# Supplementary material for: Phase separation of NELFE modulates chromatin accessibility to promote dichotomous signaling pathways in hepatocellular carcinoma
Source: Research Square preprint supplement (doi:10.21203/rs.3.rs-5843408/v1), 2025-04-25
Supplement: Supplementary file 1 [file 0d3db186af4e50bed6f4e6d6.xlsx]

## Sheet: Sheet2
Oligonucleotide	Source	Sequence	Identifier
NELFE gRNA	IDT	CCACTTTCCAGCCGTTCCAG	NELFE gRNA for KnockOut
NELFE gRNA 5	IDT	TGGCTTCTAGGGAACAGAGC	sgRNA to guide donor DNA for eGFP KI cell lines
NELFE gRNA 6	IDT	AACCTTGTGGATGGCTTCTA	sgRNA to guide donor DNA for eGFP KI cell lines
SMARCB1 1-1b	IDT	GAAGCCCGTGAAGTTCCAGC	SMARCB1 (lenti-CRISPRv2-sg1-1b) gRNA
SMARCB1 1-2b	IDT	ATGGCGCTGAGCAAGACCTT	SMARCB1 (lenti-CRISPRv2-sg1-2b)
DLCS1 gRNA 1	IDT	CCCCTCGAAGCTTTGACTGG	gRNA 1, downstream of aa147-163 in exon 6, (pSpCas9(BB)-2A-Blast.NELFE.dLCS1)
DLCS1 gRNA 2	IDT	AGTGATCGACTTCGAGAACT	gRNA 2, upstream of aa147-163 in exon 6, (pSpCas9(BB)-2A-Blast.NELFE.dLCS1)
