# Supplementary material for: Phase separation of NELFE modulates chromatin accessibility to promote dichotomous signaling pathways in hepatocellular carcinoma
Source: Research Square preprint supplement (doi:10.21203/rs.3.rs-5843408/v1), 2025-04-25
Supplement: Supplementary file 2 [file 12a521d0fce569d9b9b904a0.xlsx]

## Sheet: Group I
gene.value	PRR_EV	PRR_KO	log2FC_PRR
AAGAB	0.0432157	0.324118	2.904
AASDHPPT	0.154342	0.502728	1.703
ABAT	0.432157	2.755	2.67214
ABCB9	0.199747	0.987787	2.30545
ABCC1	0.810294	3.24118	1.99987
ABCC11	0.432157	9.0753	4.392
ABCC2	0.0978107	0.846888	3.1128
ABHD13	0.138908	0.405147	1.54364
ABHD2	0.115264	0.871066	2.91676
ABHD3	0.324118	0.972353	1.58467
ABI2	0.100322	3.88941	5.27544
ACAD9	0.648235	3.5653	2.45925
ACAD9-DT	0.202574	2.26882	3.48478
ACADVL	0.540196	2.25915	2.06402
ACOT13	0.0436496	0.242847	2.4733
ACOX1	0.036013	0.216078	2.58163
ACP1	0.0137922	0.123754	3.15629
ACP2	0.0648235	0.216078	1.73541
ACTR1B	0.176791	0.648236	1.87388
ADAL	0.0138907	0.0810294	2.53575
ADAM22	0.162059	0.648235	1.99933
ADAMTS16-DT	1.29647	9.72353	2.90679
ADAT2	0.244889	1.42612	2.54141
ADAT3	0.0829137	1.40451	4.08068
ADCK5	0.0675244	0.226882	1.74696
ADD3	0.0549352	0.573439	3.38147
ADGRG6	0.335054	3.49394	3.382
ADGRL2	5.64891	21.5538	1.93188
ADH5	0.0103552	0.0336745	1.69172
ADPRHL1	3.08946	11.02	1.83466
AFDN	0.204902	0.857958	2.06544
AFG1L	0.0518588	0.393571	2.92155
AFG3L1P	0.182969	1.53219	3.06523
AFTPH	0.0277815	0.60772	4.44627
AGPS	0.162059	0.585503	1.85252
AHDC1	0.216078	1.29647	2.58441
AHRR	0.294652	1.29647	2.13713
AIFM2	0.0540195	5.83412	6.75225
AIMP2	0.0210618	0.0597663	1.50028
AIP	0.0223529	0.259294	3.53017
AK9	0.0567206	1.29647	4.51214
AKAP1	0.190866	0.58	1.60299
AKAP13	0.125366	1.00372	3.00013
AKIP1	0.486176	4.53765	3.22213
ALDH3A2	0.0859107	0.488281	2.50542
AMDHD2	0.0488892	0.197557	2.01247
AMPD3	0.324118	1.94471	2.58459
ANAPC5	0.0810294	0.648235	2.99844
ANGEL1	0.0648235	0.972353	3.90482
ANGEL2	0.448778	9.72354	4.4371
ANKAR	0.114395	0.864314	2.91644
ANKRD12	0.72162	2.46329	1.77114
ANKRD13C	0.0083107	0.162059	4.26904
ANKRD13C-DT	0.0114394	0.0405147	1.81543
ANKRD23	0.162059	0.972353	2.58422
ANKRD39	0.162059	0.972353	2.58422
ANKRD40	0.0245543	0.324118	3.71705
ANKRD42	0.518588	2.26882	2.12907
ANKUB1	0.19447	0.648235	1.73645
ANKZF1	0.00989671	0.0585212	2.5519
ANP32A	0.151255	0.756275	2.32116
ANXA4	0.204706	1.53956	2.91028
AP1G1	0.0129647	0.324118	4.63322
AP4E1	0.324117	1.13441	1.80704
APBA2	0.0231513	0.216078	3.21684
APLF	0.0162059	0.076263	2.22748
AQP1	0.29	1.62059	2.48199
ARCN1	0.0640232	1.10475	4.10686
ARFGEF2	0.440597	2.81982	2.6778
ARHGAP1	0.405147	1.62059	1.99973
ARHGAP11B	0.324118	1.24245	1.93827
ARHGAP45	0.209108	0.648235	1.6318
ARHGAP5	1.84606	6.46615	1.8084
ARHGEF10	0.756275	4.10549	2.44042
ARHGEF10L	0.0360131	0.972353	4.75104
ARHGEF39	0.270098	0.810294	1.58461
ARHGEF7	0.177347	0.984357	2.47194
ARID1A	0.0343035	0.326986	3.24904
ARIH1	0.0687574	0.194827	1.50125
ARL14EP	0.0922823	0.283603	1.61869
ARL5B	0.122406	0.741625	2.59803
ARMC10	0.300109	7.45471	4.63413
ARMT1	0.112895	1.34277	3.57099
ARPC5L	0.111126	0.347269	1.64297
ARPIN	0.589305	7.77883	3.72224
ARRDC2	0.246947	0.837304	1.76114
ARRDC3	1.71592	29.4947	4.10333
ARSG	0.162059	1.29647	2.99922
ASF1A	0.0399213	0.154698	1.95155
ASPH	0.0257821	0.092605	1.84069
ASPRV1	0.0341176	0.134277	1.97348
ATAD3A	0.155013	0.631176	2.02495
ATAD5	0.0560972	0.76978	3.77606
ATF5	0.160122	0.92605	2.53118
ATOSA	0.324118	4.86177	3.90648
ATP1A1	0.0151761	0.0507945	1.73624
ATP5F1C	0.0872625	0.378137	2.11421
ATP5MC3	0.324118	1.62059	2.32157
ATP5MG	0.020399	0.0900327	2.1365
ATP6V0A1	0.0393437	0.243088	2.62421
ATP6V0C	0.0497781	0.221068	2.14866
ATP6V1B1	0.206257	0.972353	2.23649
ATP6V1C1	0.00679966	0.203377	4.8822
ATR	0.0381315	0.243088	2.66924
ATXN7L2	0.0546265	0.55563	3.34407
ATXN7L3	0.845524	2.59294	1.61656
AZI2	0.0463024	0.324118	2.80469
B3GALT9	0.0490557	0.304629	2.6321
B3GNT2	0.262381	1.29647	2.30442
B3GNT5	0.221879	0.731342	1.72032
BABAM2	0.204301	1.3346	2.70704
BACE1	0.332428	0.972353	1.54815
BAD	0.210466	0.818161	1.95829
BAHCC1	0.00970129	0.0300219	1.61977
BAMBI	0.034863	0.813572	4.54055
BAZ2B	0.0202573	0.120044	2.56114
BCAR3-AS1	0.432157	4.53765	3.39202
BCAS4	0.0341176	0.810295	4.56581
BCCIP	0.0196435	0.0820551	2.05697
BCL2L11	0.0146439	0.0444161	1.59421
BCL7A	0.0566969	0.371056	2.70814
BCL9L	0.324118	2.59294	2.99961
BDNF-AS	0.0202573	0.120387	2.56525
BFSP1	0.567206	1.62059	1.51441
BID	0.518588	1.62059	1.64367
BIRC6	0.099537	0.762277	2.93575
BLOC1S1	0.162059	0.648235	1.99933
BLOC1S4	0.179366	2.96336	4.0455
BOD1	0.259294	1.94471	2.90641
BPHL	0.19447	0.749522	1.94587
BPTF	0.115577	0.479862	2.05282
BRAF	0.147326	0.567206	1.94413
BRAP	0.0262798	0.0997284	1.92002
BRAT1	0.108039	0.648236	2.58385
BROX	0.176207	2.10677	3.57894
BTF3L4	0.163468	0.972353	2.57174
BTG2	0.0162059	0.163053	3.32276
BUB1B	0.164191	1.63468	3.31477
BZW2	0.121336	0.455074	1.90622
C11orf24	0.0113725	0.128529	3.48696
C11orf54	0.0138174	0.0571242	2.03973
C11orf65	0.0142993	0.144052	3.32352
C11orf71	0.0457578	0.598371	3.70604
C12orf60	0.00810294	0.0648235	2.98453
C12orf76	0.0145127	0.324118	4.47167
C14orf28	0.030386	0.831698	4.77001
C15orf39	0.216078	0.931838	2.10801
C16orf95	0.0434792	0.129647	1.57399
C16orf95-DT	0.190918	2.86304	3.90582
C17orf100	0.0373982	0.112737	1.58934
C18orf32	0.108039	0.648235	2.58385
C1orf53	0.367917	1.13843	1.62933
C21orf58	0.324118	1.29647	1.99967
C2CD2L	0.0241879	0.162059	2.7391
C2orf72	0.477229	1.49094	1.64327
C2orf92	0.0527633	0.283603	2.42404
C5orf24	0.589304	2.44169	2.05061
C7orf25	0.00900325	0.0316212	1.80099
C9orf85	0.0394197	0.218591	2.46825
CAB39	0.875578	4.19182	2.25914
CACUL1	0.0179732	0.129647	2.84377
CALCRL-AS1	0.324118	1.13441	1.80704
CALM2	0.0159402	0.0518588	1.69568
CAND1.11	0.197013	0.727075	1.88328
CAPN2	0.20208	0.930968	2.20325
CAPRIN1	0.96335	3.01309	1.64501
CAPZB	0.0810294	0.324118	1.99867
CARD10	0.324118	1.62059	2.32157
CARM1	0.463025	3.44328	2.89435
CARNMT1	0.270098	1.29647	2.26261
CASC15	0.972353	7.29265	2.90676
CASC19	0.0590839	1.51255	4.67573
CASZ1	0.0540196	0.162059	1.58318
CAVIN2-AS1	0.150483	0.594216	1.98067
CBLC	0.0457578	0.162059	1.82217
CBLL1-AS1	0.0162059	0.0507314	1.64033
CCAT1	0.042647	0.162059	1.92351
CCDC117	0.134725	0.544055	2.01293
CCDC126	0.277815	1.29647	2.22199
CCDC127	0.422762	4.86177	3.52325
CCDC134	0.0112736	0.03398	1.58323
CCDC137	0.119412	0.625084	2.38713
CCDC142	0.0360131	0.243088	2.75148
CCDC50	0.265749	0.833874	1.64939
CCDC9	4.41611	35.3288	2.99997
CCL15	0.00810293	0.0731878	3.15936
CCL15-CCL14	0.0122308	0.0731878	2.5713
CCM2	1.58007	4.48363	1.50462
CCNJ	0.367333	4.69971	3.67705
CCS	0.0468603	0.195978	2.06191
CCSER1	0.165714	0.717278	2.11317
CCSER2	0.0418216	0.283603	2.75862
CCT6P1	0.46817	4.69971	3.32719
CD24	0.0281841	0.162059	2.51934
CD2BP2	0.00611542	0.0202573	1.71162
CD2BP2-DT	0.0347269	0.129647	1.89743
CD46	0.0082055	0.0866917	3.38542
CD63-AS1	0.567206	7.45471	3.71597
CDC37L1-DT	0.139192	1.29647	3.21852
CDC42SE2	0.182316	0.661465	1.85865
CDC45	0.015361	0.176274	3.51193
CDC73	0.0130168	0.0382214	1.54674
CDCA7	0.0694538	0.504183	2.85803
CDH1	0.513186	1.72863	1.75188
CDIPTOSP	0.0147326	0.149593	3.33516
CDK1	0.0497226	0.156471	1.65194
CDK13-DT	0.00549351	0.0540196	3.27432
CDK17	0.324118	0.972354	1.58467
CDK6	0.648235	2.59294	1.99984
CDK7	0.0294652	0.648235	4.45477
CDKL3	0.00900325	0.0360131	1.98807
CDKN2D	0.121544	0.432157	1.82922
CDPF1	0.0104554	0.216078	4.35617
CDR2L	0.540196	1.62059	1.58478
CEBPA-DT	1.45853	4.69971	1.68799
CELF1	0.324118	7.77883	4.58454
CENPBD2P	0.405147	5.34795	3.72214
CENPF	0.0673167	0.300966	2.1589
CENPN-AS1	0.277815	0.810294	1.54398
CENPO	0.489778	5.67206	3.5334
CEP135	0.19447	0.713059	1.87393
CEP250	0.116682	0.648235	2.47292
CEP57L1	0.0255882	0.12207	2.24971
CERNA3	0.162059	1.62059	3.32113
CERS4	1.01287	4.05147	1.99989
CES2	0.192719	0.567206	1.55688
CHAC1	0.0421611	0.215443	2.35057
CHAMP1	0.119161	0.448778	1.9122
CHASERR	5.89049	32.0876	2.44554
CHDH	0.30251	1.55577	2.36219
CHMP3	0.0072026	0.0376881	2.37145
CHMP4B	0.0849411	0.259294	1.60891
CHMP4C	0.0523826	0.156057	1.57308
CHPF	0.842706	4.21353	2.32179
CHPT1	0.259294	2.91706	3.49135
CHROMR	0.117861	0.648235	2.45843
CHST13	0.092605	0.810294	3.1279
CHTOP	0.151413	0.861227	2.50712
CIAO1	1.70009	18.4747	3.44179
CIAO2A	0.0180065	0.0589304	1.70495
CISD1	0.0874602	0.459167	2.39098
CKAP5	1.13441	3.5653	1.65199
CLASP1	0.0324118	0.162059	2.31837
CLASP1-AS1	34.8165	192.017	2.46338
CLGN	0.0324117	0.259294	2.99611
CLK3	0.486176	2.36206	2.28026
CLN5	0.0294652	0.131104	2.14984
CLN8	0.756275	4.10549	2.44042
CLPX	0.540196	3.34922	2.63205
CLSPN	0.324118	0.972353	1.58467
CLTCL1	0.0648235	0.324118	2.32015
CLUHP3	0.259294	1.23754	2.25437
CNBP	0.00836432	0.0907529	3.42407
CNDP2	0.0326841	0.149593	2.19094
CNN2	0.018844	0.0756274	1.99907
CNOT1	0.0720261	0.324118	2.16837
CNPY2	0.0972353	5.83412	5.90543
CNPY4	0.162059	0.810294	2.32122
COA8	0.162059	0.713059	2.13682
COBL	2.01416	34.6806	4.10581
COG7	0.0540196	0.162059	1.58318
COIL	0.0694538	0.648235	3.22054
COL18A1	0.0804201	0.523575	2.70125
COL4A1	0.842706	3.88941	2.20632
COPA	0.00635525	0.0196435	1.61283
COPB2-DT	0.0114935	0.211923	4.19283
COPS2	0.0571972	0.324118	2.50043
COPS3	0.00953287	0.432157	5.48778
COPS5	0.341983	1.01048	1.56277
COPS7A	1.78265	5.83412	1.71044
COQ7-DT	0.0168879	0.0575843	1.76367
COQ8A	0.0731879	3.51128	5.58232
COX11	0.0731471	0.512315	2.80647
COX19	0.0231513	0.30251	3.70208
COX4I1	0.813137	5.29888	2.70397
CPNE2	0.324118	1.13441	1.80704
CPSF6	0.289213	0.997285	1.78552
CPT1A	0.0670588	0.68875	3.35854
CRCP	0.0314851	0.108039	1.77557
CREB1	0.727075	4.34699	2.57968
CREB3	0.234706	1.33558	2.50803
CREBZF	0.178485	2.37686	3.73443
CRELD1	0.405147	2.05275	2.34075
CRIPT	0.0186016	0.0613889	1.71717
CSE1L	0.128363	1.61283	3.65026
CSNK1A1	0.0700794	0.729264	3.37752
CSNK1G3	0.209723	3.56529	4.08682
CSPP1	0.0405147	0.162059	1.99733
CSTF1	0.222156	1.2582	2.50117
CSTF3-DT	0.00664856	0.0198439	1.5633
CTPS1	0.17899	1.31808	2.87979
CTTN	0.525071	1.49094	1.50546
CUL4A	0.867264	3.34365	1.94676
CUTC	0.246329	1.08039	2.13244
CUX1	0.0582683	0.291706	2.32175
CWF19L2	0.0648235	0.204706	1.65744
CX3CL1	0.453765	1.62059	1.83627
CXCL2	0.0231513	0.129647	2.48032
CYBC1	0.0202573	0.405147	4.31518
CYP27A1	0.210238	1.78265	3.08332
CYP51A1	0.0190657	0.129647	2.7591
CYRIB	0.0244275	0.216078	3.13975
CYSTM1	0.0842705	0.563683	2.74033
DAAM1	0.0948486	0.319908	1.75289
DAP3	0.0238614	0.0929845	1.95783
DAZAP1	0.452059	1.68882	1.9012
DBNL	0.864315	4.86177	2.49172
DCAF11	1.44052	7.90847	2.45672
DCAF16	0.0347268	0.324118	3.21869
DCAF17	0.142369	0.479694	1.75176
DCBLD1	0.777883	9.72353	3.64369
DCTN5	0.235215	0.889106	1.91792
DCUN1D4	0.669844	3.0386	2.18134
DDIT3	0.864314	4.21353	2.28527
DDN-AS1	0.162059	1.13441	2.80659
DDX50	0.0731879	0.272941	1.89747
DDX54	0.0883957	0.518588	2.55119
DDX55	0.162059	0.74084	2.19195
DDX59-AS1	5.18588	22.6883	2.12926
DEPDC5	0.249321	6.15824	4.62589
DEPTOR	0.0810294	0.324118	1.99867
DGKA	0.0162059	0.124661	2.9357
DGUOK	0.124889	0.488281	1.9662
DHFR	0.0115756	0.432157	5.21032
DHRS7	0.794088	4.86177	2.61396
DHX29	0.162059	0.486176	1.58437
DHX8	0.0355197	0.324118	3.18621
DIS3L	0.445662	2.91706	2.71022
DISC1	0.353583	1.62059	2.19608
DLGAP1-AS2	0.228996	0.930531	2.02226
DMKN	0.810295	3.24118	1.99987
DMXL1	0.111765	5.18588	5.53479
DMXL1-DT	5.37109	17.7184	1.72195
DNAAF5	0.0388941	0.234706	2.59014
DNAJA1	0.645941	2.21366	1.7768
DNAJB1	0.0162059	0.0540196	1.73076
DNAJB11	0.184534	0.567206	1.61946
DNAJB9	0.320829	2.33609	2.86383
DNAJC25	0.293249	1.00837	1.78147
DNAJC25-GNG10	0.293249	1.44052	2.296
DNAJC3-DT	0.0241364	0.0707166	1.54691
DNM1L	0.0101287	0.0581749	2.51026
DNMT1	0.108039	0.324117	1.58407
DNMT3B	0.076263	1.29647	4.08568
DOCK1	0.0972353	3.88941	5.32048
DOP1B	0.0589305	0.243088	2.04254
DPH6-DT	0.432157	2.00953	2.21697
DPY19L3	0.0216078	0.108039	2.3166
DRAM2	0.0810294	0.259294	1.67685
DSG2	0.226882	3.24118	3.83591
DSN1	0.0259294	0.324118	3.63875
DTWD1	0.0306598	0.0933599	1.6033
DUS2	0.00635524	0.0810294	3.65168
DUS3L	0.0190657	0.0547804	1.51776
DYNLL1	0.0463025	0.162059	1.80513
DYNLT4	0.119719	0.842706	2.81434
E4F1	0.121544	0.486176	1.99911
ECH1	2.14535	8.91324	2.05469
ECHDC3	0.0701697	0.435	2.63037
ECI2	0.972353	3.45725	1.82997
EEF1AKMT2	0.216078	0.648235	1.58452
EEF1E1	0.0589305	0.648235	3.45721
EEF1E1-BLOC1S5	0.0648235	0.648235	3.31993
EFCAB2	1.22167	6.63361	2.44084
EFHC1	0.00913006	0.208361	4.49729
EFR3A	0.0700094	0.283603	2.0167
EGFR	0.304671	0.979249	1.6841
EIF2AK1	0.092605	0.486177	2.39106
EIF3G	0.277815	3.24118	3.54385
EIF3M	0.0373593	0.17756	2.24572
EIF5	0.704355	2.36912	1.74984
ELAVL1	0.285986	0.810294	1.50217
ELF1	0.0747963	0.74084	3.30639
ELF3	0.145713	0.443238	1.60429
ELMOD3	0.0953286	2.59294	4.76408
ELOA	0.113441	0.324118	1.51375
ELOB	0.0405147	0.174525	2.10419
EMC1-AS1	0.174525	0.6981	1.99938
EMC4	0.0999815	0.288688	1.52883
EME1	0.0294652	0.114394	1.9533
ENDOV	0.0454901	0.356529	2.96763
ENTPD5	0.0324117	0.162059	2.31837
EPB41L5	0.0127105	0.111765	3.12636
EPS15-AS1	0.0202574	0.216078	3.4086
EPS15L1	0.0104554	0.162059	3.94135
EPS8L2	0.720262	6.80647	3.24014
ERAP1	1.78265	9.39942	2.39848
ERBB2	0.0202574	0.324118	3.99334
ERBB3	0.149593	0.635769	2.08672
ERCC6L2-AS1	0.0142469	0.0810294	2.49948
ERGIC2	0.0085294	0.108039	3.64748
ERI2	0.0154342	0.0864313	2.47778
ERICH5	0.165742	1.13441	2.77419
ERMAP	0.138908	2.755	4.30887
ERMP1	0.0648235	4.05147	5.9636
ERO1A	0.129647	0.518589	1.99917
ERRFI1-DT	0.0704603	0.206257	1.54821
ESCO1	0.0997285	0.324118	1.69944
ESF1	0.00583995	0.0360131	2.604
ESRP2	0.498643	1.471	1.56052
ESYT2	0.648235	2.26883	1.8072
ETAA1	0.100272	1.52917	3.92942
ETV1	0.324118	1.62059	2.32157
ETV6	0.108039	1.29647	3.58374
EWSR1	3.0948	13.4656	2.12133
EXO1	1.08811	4.18635	1.94377
EXOSC10-AS1	0.0128363	0.0518588	2.00594
EXOSC5	0.108039	0.972353	3.16874
EXT1	0.0168373	0.0553372	1.71065
F10	0.0453067	0.204074	2.16882
F7	0.268554	0.761332	1.50296
FADS2	0.138907	0.45481	1.71042
FAIM	0.0810294	2.10677	4.69873
FAM107B	0.111765	1.78265	3.99428
FAM110A	0.324118	1.94471	2.58459
FAM13B	0.00900327	1.29647	7.1541
FAM177A1	0.198072	1.14914	2.53586
FAM200B	0.0949999	0.341176	1.84343
FAM216A	0.0342981	0.191568	2.47821
FAM221B	0.216078	0.648235	1.58452
FAM234A	0.0589304	0.388941	2.72039
FAM76B	0.200441	2.57133	3.6806
FAM83G	0.0520903	0.713059	3.77237
FAM8A1	0.362032	1.68292	2.21647
FANCA	0.0209108	0.138908	2.72596
FANCD2	0.0574969	0.609185	3.40305
FANCG	0.0648235	0.324118	2.32015
FARP1	0.526692	2.13918	2.02182
FBN3	0.108039	0.324118	1.58407
FBXL14	0.0540196	1.13441	4.38978
FBXL19-AS1	0.535499	9.39941	4.13336
FBXO34-AS1	0.0190657	0.0810294	2.08169
FCER1G	0.936339	14.4052	3.94327
FEN1	0.152886	0.613752	2.00449
FGFR1OP2	0.00781005	0.034905	2.1458
FGFR4	0.336121	2.00473	2.57599
FH	0.0170588	0.216078	3.6552
FHIP2A	0.0388941	0.259294	2.73382
FICD	0.567206	2.26882	1.99981
FIG4	0.0324117	0.324118	3.31793
FILIP1L	0.144052	0.432157	1.58429
FIP1L1	0.204902	1.39371	2.76532
FKBP9	0.150483	0.486177	1.69122
FLJ13224	0.324118	3.5653	3.45903
FLJ20021	0.108039	1.13441	3.39111
FLVCR1	0.818823	8.10295	3.30667
FLVCR1-DT	0.00900325	1.3775	7.24156
FLVCR2	0.324118	1.29647	1.99967
FMC1-LUC7L2	0.688751	3.95887	2.52286
FMNL2	0.490129	1.41433	1.52869
FN1	0.00558823	0.0294652	2.37785
FN1-DT	0.0648235	0.364632	2.49003
FNBP1L	0.189069	4.86177	4.68377
FNBP4	0.0266398	0.162059	2.60035
FNIP2	0.0498642	0.388941	2.96096
FNTA	0.307059	4.90763	3.998
FOXA3	0.058175	0.648235	3.47579
FOXK1	1.14146	3.56529	1.64306
FOXM1	0.0324118	0.138908	2.09613
FOXP4	0.110674	0.388941	1.8123
FOXP4-AS1	0.0926051	0.648235	2.80602
FOXQ1	0.902899	2.56593	1.50674
FRAT2	0.108039	1.29647	3.58374
FRK	0.13346	0.432157	1.6944
FRMD8	0.713059	2.26882	1.66971
FSCN2	0.436567	1.8521	2.08464
FSTL3	0.615824	3.11153	2.33685
FUBP1	0.249841	1.11126	2.15267
FXN	0.129647	0.567206	2.12843
GAB1	0.185511	1.33059	2.84182
GABPB1	0.0746937	0.291706	1.96402
GABPB1-IT1	0.13346	0.388941	1.54243
GABPB2	0.648235	2.0943	1.69173
GAD1	1.42612	10.0477	2.81661
GALNT1	0.972353	2.91706	1.58486
GALNT13-AS1	1.29647	5.51	2.08738
GANC	18.734	69.3612	1.88846
GAPVD1	0.092605	1.62059	4.12781
GARS1-DT	0.00599108	0.0244374	2.01022
GART	0.378482	1.49751	1.98398
GATA4	0.277815	1.10581	1.99252
GATC	0.0189165	0.0736631	1.95565
GBA2	0.0249321	0.216078	3.11037
GCLC	0.0720262	1.45853	4.33795
GCNT2	0.162059	1.62059	3.32113
GDF9	0.00747963	0.0270098	1.83862
GGA1	0.651864	2.00953	1.62407
GGA2	0.0147326	0.0498642	1.75212
GIGYF2	0.0735834	0.373781	2.34317
GLYCTK	0.108039	1.3775	3.6712
GMEB2	0.226882	3.24118	3.83591
GMPS	0.0988833	0.518588	2.38961
GNB2	0.18521	5.83412	4.97653
GNG5	0.103962	0.486176	2.22433
GNPDA2	0.243088	3.24118	3.73642
GON4L	0.102353	0.648235	2.66178
GOPC	0.0972353	0.432157	2.15085
GORAB	0.156271	2.59294	4.0516
GOSR2	0.0110495	0.388941	5.12488
GPATCH1	0.0331154	1.94471	5.87163
GPBP1L1	0.152895	0.481874	1.65547
GPX4	3.98049	14.9713	1.91116
GRB10	0.243088	1.94471	2.99948
GSTO1	1.16811	3.61189	1.62849
GTF2B	0.324118	1.62059	2.32157
GTF2E1	0.0373982	0.479694	3.67752
GTF2H2B	0.0120043	0.0997284	3.04393
GTF2H3	0.0228789	0.119552	2.38046
GTF2IRD1	0.640573	6.15824	3.26488
GTF3C4	1.44052	11.02	2.93537
GTF3C6	0.359691	1.32734	1.88341
GTPBP4	0.0561158	0.284591	2.34035
GUF1	0.0325746	0.105119	1.68716
GUK1	0.19447	0.92605	2.25095
GYG1	0.0648235	0.226882	1.80577
H2BC7	0.0926051	0.33319	1.84606
H3C6	0.0217338	0.206257	3.2405
H4C11	0.0396301	0.146975	1.88824
H4C16	0.0280824	0.145853	2.37264
H6PD	0.0623303	0.19447	1.63997
HAT1	0.16342	2.00107	3.6133
HDAC2	0.972352	4.21353	2.11537
HDAC9	0.0270098	0.162059	2.58052
HDHD2	0.0388941	0.138908	1.83384
HEATR5A	0.0720261	0.388941	2.43133
HECTD4	0.324118	0.972353	1.58467
HERC2P2	0.108039	0.608709	2.4931
HES4	0.216078	0.864314	1.9995
HEXA	0.00841863	0.0294652	1.79521
HEXA-AS1	0.0518588	0.211381	2.02509
HGD	0.0634143	0.18521	1.54479
HGH1	1.31962	17.5024	3.72925
HHEX	0.0907529	0.422335	2.21712
HIBADH	0.0694538	1.29647	4.22043
HIF1A	0.0869836	0.254798	1.54945
HINT2	3.60131	11.02	1.6135
HMBOX1	0.0436312	0.186368	2.09219
HMGA1	0.322403	1.1281	1.80664
HMGXB4	0.151603	0.819827	2.43424
HNF1B	0.388942	3.0251	2.95903
HNF4A	0.0877817	0.429237	2.28847
HNMT	0.0348513	0.249321	2.83517
HNRNPA3	0.810294	2.96757	1.87264
HNRNPD-DT	0.477647	2.17622	2.18757
HNRNPF	0.0904513	0.810294	3.16182
HNRNPUL1	0.0648235	0.230728	1.83
HNRNPUL2	0.0270098	0.756275	4.80221
HNRNPUL2-BSCL2	0.0270098	1.13441	5.38711
HOOK1	0.2259	1.86015	3.0411
HOOK2	0.162059	0.648235	1.99933
HOOK3	0.419446	2.59294	2.62774
HOTAIRM1	0.0474318	0.324118	2.77
HOXA-AS3	1.08039	3.56529	1.72237
HOXA4	0.277815	1.83667	2.72445
HS3ST3B1	0.150215	0.91647	2.60826
HSD17B11	0.0202573	0.0810294	1.99468
HSD17B4	0.0341176	0.197013	2.52621
HSDL2	0.437559	1.31673	1.58919
HSF1	0.0435381	0.166439	1.9322
HSF2	0.0324504	0.189069	2.53893
HSF2BP	0.120044	0.756275	2.65434
HSPA14	0.0760275	1.06239	3.80288
HSPA4	0.0599209	0.421797	2.81335
HSPA9	0.324118	0.972353	1.58467
HSPB6	0.0448778	2.26882	5.65665
HSPE1	0.560113	2.72739	2.28353
HSPE1-MOB4	0.539088	2.68827	2.31787
HTATIP2	0.972353	14.9094	3.93846
ICA1-AS1	11.5866	42.945	1.89002
ICAM1	0.00926049	1.62059	7.43581
ID2-AS1	0.229583	2.0943	3.18882
ID3	0.0410275	2.91706	6.14832
IDH2	0.324118	1.29647	1.99967
IDUA	0.551	1.62059	1.55622
IFT46	0.0651552	0.361043	2.4684
IFT52	0.0342679	1.20387	5.13059
IFT70A	0.288105	1.62059	2.49144
IKBIP	0.00771707	0.0373982	2.26212
IKBKB	0.0511764	1.55576	4.92328
IL17RC	1.70162	6.15824	1.85555
IL27RA	0.108039	0.324118	1.58407
IL4R	0.324118	7.77883	4.58454
IL6R	0.251191	1.51255	2.58965
IL6ST	0.178824	0.972353	2.44229
IL6ST-DT	0.0992197	0.398914	2.00629
ILF3	1.04031	3.33378	1.68005
ILK	0.922489	2.91706	1.6608
ILRUN-AS1	0.0270098	0.540196	4.31686
INHBE	0.914402	151.039	7.36772
INPP1	0.324118	1.06496	1.7159
INSIG1	0.891324	4.37559	2.29533
IPO5	0.0948934	0.757959	2.99641
IPO9	0.060772	0.259294	2.09129
IQCH-AS1	0.0525596	0.243088	2.20731
IQCK	0.0190658	0.324118	4.08036
IQGAP1	0.0792288	0.459166	2.53342
IRAK2	0.482407	3.18716	2.72369
IREB2	0.134745	0.489313	1.85975
IRF2BPL	0.129647	1.3775	3.40838
IRS2	1.21544	4.53765	1.90038
ISCA1	0.162059	0.540196	1.73634
IST1	0.00918552	0.0379597	2.03521
ITCH	0.0578781	2.59294	5.48299
ITFG1	0.324118	0.972353	1.58467
ITFG2	0.0653921	0.186195	1.5082
ITFG2-AS1	0.0365939	0.112449	1.61694
ITGA7	0.0231513	0.129647	2.48032
ITGAE	0.00675244	0.0463025	2.75951
ITPRID2	1.1422	5.11032	2.1615
JAGN1	0.0832193	0.277815	1.73792
JAK1	0.0167647	0.0525596	1.64269
JAK2	0.46817	1.62059	1.79119
JMJD1C-AS1	3.80838	11.6682	1.61531
JOSD1	0.0118579	0.0432156	1.85692
JPT1	0.702254	2.26882	1.69174
JTB	0.162059	0.648235	1.99933
JUN	0.092605	0.405147	2.12808
KANSL1L	0.997286	3.5653	1.83784
KAT7	0.062065	1.05765	4.08875
KAT8	0.519541	1.98993	1.9372
KATNBL1	0.0648235	0.18521	1.51313
KCMF1	0.520713	6.03956	3.53563
KCTD10	0.0360131	0.162059	2.16681
KDM4A-AS1	0.477647	4.69971	3.29828
KHDRBS1	0.229485	0.858912	1.90365
KHNYN	0.509328	1.71319	1.74982
KIAA0586	9.49007	30.9524	1.70555
KIAA0753	0.162059	1.62059	3.32113
KIAA1217	0.0372787	0.210608	2.49496
KIF11	0.243088	1.29647	2.41456
KIF13A	0.202574	2.43088	3.58431
KIF18A	0.216078	0.810294	1.9064
KIF23	0.0341176	0.405147	3.56599
KIF9-AS1	0.0926051	0.388941	2.0692
KIFC1	0.0324117	0.239565	2.88199
KLC1	0.324118	1.42612	2.13716
KLC2	0.464407	1.74406	1.90876
KLF10	0.0637608	0.216078	1.75922
KLF15	1.66689	5.18588	1.63737
KLF3	0.436854	3.11153	2.83212
KLHDC10	0.388941	1.45853	1.90662
KLHL20	0.364632	1.15756	1.66631
KLLN	0.0258146	0.243088	3.23023
KMT2A	0.020399	0.0900327	2.1365
KMT5B	0.162059	0.486176	1.58437
KNSTRN	0.243088	5.59103	4.523
KRIT1	0.0202573	0.129647	2.67208
KRT10	0.162059	0.648235	1.99933
KTN1	0.380486	1.86368	2.29193
KXD1	0.424632	2.39847	2.49755
LAD1	0.0728672	0.835149	3.51689
LAMP1	0.0230746	0.111581	2.26877
LANCL2	0.613419	1.88752	1.62139
LAP3	0.0199736	0.0857958	2.09729
LARS1	0.0190657	0.0720261	1.91199
LDAH	0.0810294	0.356529	2.13613
LEAP2	0.0249321	0.648235	4.69489
LECT2	1.29647	3.88941	1.58489
LEKR1	0.278627	1.0848	1.96064
LEPROT	0.0788394	0.486176	2.62296
LGR4-AS1	0.648235	3.88941	2.58478
LIG3	0.212702	0.942887	2.14773
LIN9	0.0720261	0.457578	2.66574
LINC00265	0.405147	1.62059	1.99973
LINC00847	0.324118	0.972353	1.58467
LINC00963	0.246551	0.897557	1.86369
LINC01031	0.486176	1.62059	1.73676
LINC01134	0.00544735	0.0171491	1.63665
LINC01424	0.648235	2.26882	1.8072
LINC01503	0.445662	1.29647	1.54036
LINC01637	0.0810294	0.756274	3.2208
LINC01816	0.0294652	0.162059	2.45543
LINC01852	0.0463025	3.24118	6.12622
LINC01881	0.409412	1.26406	1.6262
LINC02015	0.162059	1.29647	2.99922
LINC02029	0.0675244	2.10677	4.96141
LINC02381	0.0648235	0.324118	2.32015
LINC02410	0.108039	0.324118	1.58407
LINC02538	0.129647	1.13441	3.1283
LINC02888	0.0264586	0.342745	3.69031
LINC02928	0.0324118	0.810294	4.63959
LINC02983	0.10569	1.03718	3.29352
LINC02987	1.78265	11.3441	2.66978
LINC03064	0.0628591	0.235722	1.90521
LIPC	0.058175	0.795561	3.77121
LLPH-DT	0.030251	0.194471	2.68048
LMBRD2	0.270098	1.58818	2.55537
LMCD1	0.157428	0.477647	1.60063
LMCD1-AS1	0.416722	1.29647	1.6372
LMTK2	0.202574	0.720261	1.82956
LOC100289495	0.00592897	0.236855	5.29656
LOC100506207	0.0155826	0.19447	3.63306
LOC100506235	0.978751	6.80647	2.79777
LOC100996437	0.0426821	0.158246	1.888
LOC101926907	0.0308683	0.206257	2.73627
LOC101927157	0.162059	0.972353	2.58422
LOC101927314	0.0360131	0.108039	1.5823
LOC101927394	0.388941	1.29647	1.73671
LOC101927942	1.35435	5.63965	2.05792
LOC101928053	0.00627324	0.0185969	1.5527
LOC101928868	0.0202573	0.0864313	2.08767
LOC101929935	0.0463025	0.324118	2.80469
LOC105369363	0.0135993	0.0810294	2.56612
LOC105369850	0.0178413	0.119064	2.73159
LOC105370805	0.324118	1.29647	1.99967
LOC105370866	0.0290874	0.436086	3.90152
LOC105372180	0.648235	2.59294	1.99983
LOC105372564	0.00720261	0.025421	1.8052
LOC105373689	0.0589305	0.324118	2.45743
LOC105374101	0.0134118	0.0641817	2.25019
LOC105374775	0.0127105	0.324118	4.66157
LOC105374914	0.0162059	0.162059	3.31394
LOC105375170	0.259294	2.4849	3.26003
LOC105375521	0.0432156	0.162059	1.90445
LOC105376286	0.108039	0.972353	3.16874
LOC105376860	2.97109	15.8818	2.41827
LOC105379091	0.265187	1.68541	2.66756
LOC107984043	0.0135049	0.231513	4.08952
LOC107984236	0.0125196	0.0585212	2.21576
LOC107984551	0.0365546	0.359476	3.29423
LOC107984867	0.092605	1.29647	3.80591
LOC107985416	0.257442	1.51255	2.5542
LOC107985502	0.445662	2.98188	2.74193
LOC107985549	0.143845	0.545506	1.92234
LOC107986160	0.347269	1.72863	2.31517
LOC107986770	0.108039	0.324118	1.58407
LOC112267952	0.0155826	0.19447	3.63306
LOC112267957	0.0324118	0.162059	2.31837
LOC115308161	0.441979	2.37686	2.42674
LOC124900354	0.324118	1.29647	1.99967
LOC124901030	2.26883	9.39942	2.05058
LOC124901255	0.0154342	0.19447	3.64678
LOC124901261	0.00926049	0.0388941	2.0586
LOC124901286	0.432157	3.5653	3.0441
LOC124901408	0.00847982	0.0542708	2.66381
LOC124901893	2.42235	17.6644	2.86631
LOC124901940	0.127683	2.46329	4.26888
LOC124902110	0.131152	0.966274	2.88024
LOC124902971	0.0632424	1.62059	4.67729
LOC124903200	0.0343761	0.972353	4.81796
LOC124903490	0.363012	3.5653	3.29558
LOC124903567	0.648235	12.3165	4.24772
LOC124903573	0.00720261	0.0883958	3.59913
LOC124903667	0.0810294	0.259294	1.67685
LOC124903684	0.0115756	0.112737	3.27266
LOC124903703	0.283603	1.20387	2.08534
LOC124903843	0.00730645	0.0499777	2.75732
LOC124904403	0.0115756	0.036013	1.62902
LOC124904480	0.0494416	0.265187	2.42084
LOC124904695	0.00661464	0.126829	4.24056
LOC124905134	0.0480174	0.19447	2.01566
LOC124907972	0.0324118	1.29647	5.3176
LOC124908047	0.324118	0.972354	1.58467
LOC128125814	0.530374	4.10549	2.95224
LOC155060	0.583412	2.26882	1.95917
LOC399900	0.0464819	0.338333	2.86103
LOC731157	0.0167071	0.0739834	2.14008
LPP-AS2	0.00982174	0.127019	3.67944
LRP1	0.136471	1.78265	3.70639
LRP11	0.0623303	0.37042	2.56923
LRP5L	0.162059	2.26882	3.80653
LRRC23	0.158106	0.562619	1.83061
LRRC45	1.35049	4.53765	1.74839
LRRC57	0.138907	0.68875	2.30903
LRRC58	0.0209108	0.0736631	1.81177
LRRC61	0.0170588	0.0597059	1.80134
LRRFIP1	1.07541	4.26071	1.9861
LSM1	0.092605	0.810294	3.1279
LSM14A	0.129647	0.396144	1.61069
LSM5	0.00724285	0.0589304	3.00705
LSR	6.96853	24.3088	1.80254
LTBP3	0.324118	0.972353	1.58467
LYPLAL1	0.0530374	0.288888	2.44321
LYSMD4	0.00600217	0.0810294	3.73283
MAD1L1	0.324118	0.972353	1.58467
MADCAM1-AS1	0.0308683	0.194471	2.65143
MAK16	0.0830383	1.16507	3.80888
MANBAL	0.0236582	0.132594	2.4816
MAP3K20	0.208361	1.40451	2.75232
MAP3K7	0.324118	0.972353	1.58467
MAP3K8	0.620051	2.05275	1.72693
MAP4K3	0.162059	2.26882	3.80653
MAPKAPK5	0.36594	3.69494	3.33552
MARCHF6	1.00975	3.94059	1.96431
MARVELD2	0.972353	3.0251	1.63733
MATCAP2	0.108039	1.62059	3.90565
MATR3	0.638531	2.17246	1.76634
MBD3L1	0.270098	1.62059	2.58452
MBNL1	0.278662	1.49557	2.42368
MCCC1	0.972353	6.15824	2.66284
MCM2	0.124245	0.910616	2.87265
MDH1	0.0224044	0.133447	2.56907
ME1	0.224389	0.810295	1.85198
MED17	0.216078	1.06496	2.30064
MED18	0.00693299	0.0257236	1.87648
MED28	0.109968	0.702255	2.6738
MEF2A	0.158106	5.34794	5.07913
MEIG1	1.03128	5.29392	2.35978
MET	0.243088	0.972353	1.99955
METAP1	0.0363805	0.356529	3.28923
METTL15	0.016299	0.0770098	2.23331
METTL16	0.129647	0.405147	1.6431
METTL23	0.032106	0.139371	2.11456
METTL25B	0.152526	0.59073	1.95275
METTL3	0.0480174	0.148391	1.62575
METTL5	0.324117	1.45853	2.16958
MEX3A	0.0216079	4.86177	7.80715
MEX3D	0.265878	0.777882	1.54843
MFN2	0.871066	13.6129	3.9659
MFSD14A	0.270098	1.29647	2.26261
MFSD6	0.324118	0.972353	1.58467
MFSD8	0.129647	1.21544	3.22783
MGAT4B	0.154342	0.891324	2.52905
MGAT5	0.0470493	0.19447	2.04498
MGMT	0.127332	0.756275	2.56937
MGST2	0.0348585	0.194044	2.47341
MICOS10	0.0552686	0.160335	1.53485
MICOS10-NBL1	0.0541752	0.159909	1.55979
MICOS13	0.299185	0.972353	1.70011
MIEF1	0.558203	3.306	2.56601
MIEF2	0.129647	1.40451	3.4364
MIER2	0.00594711	0.0463025	2.93989
MINDY2	1.03718	3.5653	1.78126
MIP	0.0720261	2.17622	4.91522
MIR3180-1	1.01557	5.34794	2.39658
MIR4442	0.0166214	0.0694538	2.05643
MIR4444-1	0.810294	2.96757	1.87264
MIR4470	0.00840304	0.0883957	3.37956
MIR4738	0.733123	3.34922	2.19154
MIR4741	0.0700795	2.26882	5.01482
MIR6125	0.0152526	0.144052	3.23104
MIR632	0.056105	0.220989	1.97586
MIR7706	0.120213	0.993264	3.04554
MIR7845	0.285986	0.929137	1.6996
MIR99AHG	1.41433	4.1325	1.54683
MIRLET7A1HG	1.81007	8.67911	2.26144
MIRLET7I	0.750588	5.09328	2.76234
MMADHC	0.516187	1.77184	1.77909
MMS22L	0.0360131	0.810295	4.48803
MOB1A	0.129647	2.59294	4.32087
MOB4	0.339552	5.83412	4.10241
MOGS	0.092605	0.513186	2.46904
MORC3	0.0617367	1.94471	4.97502
MRM3	0.100955	0.724498	2.84205
MRPL1	0.19207	0.690512	1.84549
MRPL20	0.0648235	0.324118	2.32015
MRPL24	0.108039	0.563683	2.38225
MRPL33	0.253584	1.69004	2.73604
MRPL36	0.0439481	0.30386	2.78673
MRPL40	0.0554411	0.307496	2.46941
MRPL44	0.0355197	0.196177	2.46214
MRPL46	0.182316	0.842706	2.20797
MRPL48	0.0493223	1.29647	4.7134
MRPL54	0.0445352	0.238824	2.4203
MRPL58	0.0104554	0.092605	3.13467
MRPS24	0.00982173	0.0694537	2.80946
MSANTD7	0.0760275	1.06239	3.80288
MSH6	0.015276	0.0776248	2.33769
MSI2	1.21313	3.95424	1.70459
MSL1	0.491087	2.06625	2.07274
MSRB2	0.0872624	0.259294	1.57006
MSTO1	0.0219741	0.0873084	1.98542
MTARC1	0.0556084	1.06959	4.26315
MTBP	0.0120044	0.0848879	2.81173
MTHFD1L	0.268934	0.761331	1.50093
MTIF2	0.0648235	0.270098	2.0572
MTO1	0.0140921	0.123306	3.12025
MTR	0.0555064	0.227451	2.03287
MTSS2	0.0810294	0.324118	1.99867
MTX2	0.196786	0.671387	1.77
MVP-DT	2.45948	13.7426	2.48218
MYH14	0.750588	3.07912	2.03628
MYL12B	0.242499	2.1917	3.17547
N4BP2	0.129647	0.621955	2.26134
N4BP2L1	0.0324117	0.486176	3.90274
N6AMT1	0.108039	0.324118	1.58407
NAA15	0.058617	0.218156	1.89417
NAA50	0.231513	1.45853	2.65483
NAALADL2	0.030386	0.132594	2.12188
NABP2	0.0332428	0.254664	2.93371
NACC1	0.102653	0.364632	1.82766
NADK2	0.0682353	0.238824	1.80585
NAGK	0.229829	0.692433	1.5907
NAGLU	0.336828	1.57429	2.22428
NALT1	0.324118	1.29647	1.99967
NAT9	0.129647	2.26882	4.12824
NAXD	0.0842705	0.900327	3.4158
NBEAL1	0.30251	0.972353	1.68417
NBN	0.0294652	0.259294	3.13317
NBR1	0.0362649	0.244198	2.74803
NCAPG	0.474371	2.24567	2.24282
NCAPH	0.819827	2.86304	1.80403
NCL	0.0259294	0.108039	2.05468
NCLN	0.0437302	0.132971	1.6022
NCOA3	0.0125061	0.039287	1.64359
NCOA4	0.010569	0.0305771	1.52373
NCOR1	0.0294652	0.162059	2.45543
NDC80	0.0101924	0.0887465	3.10974
NDUFA10	0.0540196	0.162059	1.58318
NDUFA2	0.00645009	0.0192273	1.56105
NDUFAB1	0.324118	1.62059	2.32157
NDUFAF5	0.62871	4.76916	2.92307
NDUFAF8	0.191146	2.08118	3.44397
NDUFB2	0.0483156	0.260875	2.43037
NDUFS1	0.00611542	0.0648235	3.38482
NDUFS2	0.111524	0.318529	1.51323
NDUFS4	0.0720261	0.68875	3.2556
NDUFV2	0.722325	2.53739	1.81248
NEK7	1.00476	7.45471	2.89117
NELFA	0.00771708	0.0648235	3.05404
NELFCD	0.0540195	0.388941	2.8457
NEMP2-DT	0.0648235	0.216078	1.73541
NEURL2	0.259294	3.88941	3.90637
NEXN	0.504183	5.83412	3.53223
NF1	0.0752234	0.38285	2.34599
NF2	0.113441	0.486177	2.09856
NFE2L1	0.585277	2.58094	2.14051
NFIA	0.145671	0.961898	2.72233
NFKBIA	0.0540196	2.26882	5.38971
NFYB	0.216078	1.94471	3.16933
NGDN	0.0369607	0.252092	2.76656
NGRN	0.216865	0.802034	1.88638
NHLRC2	0.0420477	0.157148	1.89952
NID1	0.388941	3.34922	3.10587
NINJ1	0.740841	4.53765	2.61455
NINJ2-AS1	0.972353	4.42961	2.18751
NIPA1	0.648235	2.26882	1.8072
NIPA2	0.0366234	0.277815	2.91987
NIPBL-DT	0.0373982	0.138908	1.89027
NIT2	0.022326	0.149593	2.73876
NLN	0.101287	0.74084	2.86949
NMD3	0.018983	0.105269	2.46509
NME1	0.105059	0.34905	1.73128
NME2	1.43852	13.2281	3.20085
NMT1	0.0813993	0.704333	3.1116
NNT-AS1	0.363012	1.11864	1.62338
NOCT	0.0860635	0.59367	2.78476
NOL12	0.377829	7.13059	4.23786
NOL3	0.453765	2.4633	2.44031
NOL7	0.190391	0.6612	1.79558
NOP58	0.0616615	0.274569	2.15291
NOSIP	0.0498643	0.283603	2.50541
NR2C2	1.90658	7.02255	1.88096
NR2F1	0.13592	1.00476	2.88511
NR2F1-AS1	0.376048	6.60022	4.13316
NR3C2	0.166187	1.62059	3.28486
NR5A2	0.0291998	0.202574	2.7902
NRF1	0.405147	1.94471	2.26275
NRL	1.1074	3.24118	1.54925
NSD3	0.648236	11.9924	4.20924
NSMCE1-DT	0.0115744	0.0447058	1.94034
NSRP1	0.0332822	0.125845	1.91564
NSUN3	0.0966118	0.748823	2.95305
NSUN7	1.25326	6.80647	2.44113
NUCB2	0.0311651	0.119412	1.93453
NUDT1	0.324118	0.972353	1.58467
NUDT22	0.448778	1.40451	1.64577
NUP155	0.0463025	0.432157	3.21962
NUP35	0.138148	0.41138	1.57356
NUP42	0.00885194	0.050388	2.49567
NUP85	0.132048	0.453765	1.78011
NUSAP1	0.174257	0.709972	2.02592
OBSL1	0.0720262	1.29647	4.16803
OCIAD1	0.254597	1.01287	1.99174
OCLN	0.305052	0.998633	1.71057
OGDH	0.772162	3.16915	2.03698
OGFR	0.0785739	0.252091	1.68056
OGFRL1	0.102353	1.13441	3.46904
OIP5-AS1	0.174257	1.16682	2.7426
OLFM2	0.0810294	0.972353	3.58333
OLFML3	0.922488	5.67206	2.62014
OLMALINC	0.784706	2.85813	1.86471
ONECUT1	0.129647	6.48236	5.64277
ONECUT2	4.959	39.7044	3.00115
OPA1	0.0322421	0.0972353	1.58955
ORAI1	0.223529	0.997285	2.15704
ORC1	0.0246165	0.194471	2.97675
ORC3	0.0166214	0.12656	2.9212
OTUD6B	0.101125	0.324118	1.6794
OTUD6B-AS1	0.0177599	1.37273	6.26429
OTULINL	0.283603	0.972353	1.77725
OXLD1	0.0114732	0.0694538	2.58734
OXNAD1	0.00825777	0.0504183	2.59562
PA2G4	0.0131262	0.0575911	2.12495
PAFAH1B2	0.471444	1.47654	1.64685
PAGR1	0.552907	2.71449	2.29536
PALS2	0.406227	1.22532	1.59257
PAQR9-AS1	1.13441	3.72735	1.71612
PARD3	0.144052	2.91706	4.3389
PARP10	0.0503288	0.393864	2.96575
PATL1	0.0180065	0.486176	4.7472
PATL1-DT	0.00985908	0.0617367	2.63438
PCBP1-AS1	0.0426706	0.149197	1.80349
PCCA-DT	0.0319552	0.756274	4.56047
PCCB	1.06351	3.07912	1.53359
PCID2	0.0249321	0.121544	2.28081
PCM1	0.159776	1.62059	3.34158
PCNP	0.412513	3.09121	2.90536
PCNX4	0.285867	3.65059	3.67425
PCSK6	0.0540196	0.235722	2.12347
PCYOX1	1.35049	4.75373	1.8155
PCYT1A	0.0324118	0.432157	3.73285
PDCD11	0.0324117	0.141801	2.12586
PDCD2L	0.048375	0.142612	1.55779
PDCD4	2.27735	12.4461	2.45021
PDCL3	0.238824	0.864314	1.85517
PDGFC	0.108039	0.324118	1.58407
PDGFRA	0.213623	1.32594	2.63331
PDIA4	0.216078	0.648235	1.58452
PDIK1L	0.972353	7.63343	2.97265
PDLIM1	0.324118	1.29647	1.99967
PDLIM5	4.22508	18.2561	2.1113
PELP1	0.00982174	0.0447059	2.17502
PELP1-DT	0.0196435	0.162059	3.03796
PET100	0.104096	0.405147	1.9595
PEX10	0.694537	4.53765	2.70764
PEX19	4.21353	13.9371	1.7258
PEX3	0.0766095	0.221349	1.52949
PFDN4	0.24957	0.868018	1.79787
PFKL	0.0810294	1.62059	4.32024
PFKM	1.78265	7.77883	2.12547
PGGT1B	0.0231513	0.648235	4.80136
PGM1	0.0810294	0.324118	1.99867
PGS1	0.0871036	1.23165	3.82018
PHACTR2	0.0720261	0.459167	2.67074
PHF20L1	0.127522	0.763991	2.58187
PHF3	0.153956	1.67176	3.43993
PHLDA1	0.324118	1.94471	2.58459
PHRF1	0.0911581	0.367333	2.00946
PI4K2B	0.0264052	0.107233	2.01774
PIGL	0.0121165	0.0409599	1.7489
PIGP	0.0540196	0.648235	3.58252
PIGQ	1.00837	3.88941	1.94743
PIK3C2B	0.74084	2.59294	1.80722
PIK3R2	0.0270098	0.113441	2.06633
PIK3R3	0.108039	0.324118	1.58407
PITPNB	0.108039	2.05275	4.24666
PKIB	0.0648235	0.648235	3.31993
PKMYT1	0.55563	2.07435	1.90028
PKNOX1	2.02574	8.58912	2.08401
PLA2G4E-AS1	0.0144052	0.108039	2.89825
PLCB1-IT1	0.941967	2.72259	1.53113
PLCG1-AS1	0.631176	5.58986	3.14649
PLEC	0.108039	0.324118	1.58407
PLEKHA1	0.972353	10.0477	3.3691
PLEKHA5	0.220989	1.16301	2.39529
PLEKHF2	0.323444	1.37127	2.08358
PLEKHG3	0.818265	9.23736	3.49668
PLEKHH1	0.162059	1.62059	3.32113
PLEKHM2	0.092605	0.324118	1.80624
PLEKHM3	0.162059	0.972353	2.58422
PLIN2	0.243088	0.972353	1.99955
PLK4	0.0864314	0.463025	2.42011
PLPBP	0.0350397	0.405147	3.52763
PLPP3	0.092605	0.518588	2.48415
PLS1	0.162059	0.972353	2.58422
PM20D2	0.156057	0.82276	2.39765
PNKP	0.0957481	0.595406	2.63529
PNRC2	0.335043	1.12407	1.74601
POC1B-GALNT4	0.216078	0.648235	1.58452
POGK	0.41487	1.34186	1.69326
POLG2	0.0563683	0.259294	2.19963
POLR1B	1.04438	3.13314	1.58487
POLR1D	1.62059	8.75118	2.43289
POLR2B	0.370819	1.3598	1.87433
POLR3B	0.416723	11.02	4.72456
POP1	0.154342	2.59294	4.06951
PPA1	0.0580509	0.194471	1.74242
PPCDC	0.0142157	0.0992196	2.79448
PPCS	0.0595317	0.234085	1.9735
PPFIBP1	0.0177598	0.0694538	1.96141
PPIL1	1.82316	14.4232	2.98381
PPIP5K2	0.012466	0.713059	5.82662
PPP1CB	0.286273	2.14276	2.90357
PPP1R12A-AS1	0.787142	3.88941	2.30471
PPP1R12B	0.043586	0.589304	3.75401
PPP1R1C	0.0491087	0.147326	1.58301
PPP1R8	0.0301504	0.153529	2.34443
PPP2CA	0.00900325	0.0360131	1.98807
PPP3CB	0.0324118	0.216078	2.73319
PPP3R1	0.345726	1.94471	2.49151
PPP4R1	0.162059	0.972353	2.58422
PPP6R3	0.234655	1.52724	2.70179
PPRC1	0.794948	2.93496	1.88427
PRDM10	0.0259294	0.0972353	1.90282
PRDM16	0.0463025	0.324118	2.80469
PREP	0.648235	3.24118	2.32175
PRKAA1	0.0405147	0.486176	3.5817
PRKAA2	0.648235	4.05147	2.64367
PRKAR1A	0.17894	1.76464	3.30111
PRKCE	0.610104	2.26882	1.89465
PRMT9	0.360131	1.03718	1.52581
PRNP	0.486176	1.94471	1.99978
PROSER2	0.713059	5.18589	2.86232
PROSER3	0.292906	2.34706	3.00191
PROZ	0.162059	0.702255	2.11479
PRPF19	0.324118	6.15824	4.24751
PRPF38B	0.128248	0.382565	1.57602
PRPF4B	0.0498642	0.210676	2.07675
PRR13	0.100776	0.49991	2.30938
PSAT1	0.0104861	0.0698099	2.72332
PSMA2	0.0129647	0.0498642	1.93522
PSMA4	0.104473	0.302019	1.53061
PSMB3	1.13441	4.83476	2.0914
PSMC4	1.00575	4.29456	2.09413
PSMC6	0.139595	0.632295	2.17854
PSMD11	0.0956972	0.466413	2.28386
PSMD13	0.0147326	0.149398	3.33328
PSMD3	0.0708794	0.42371	2.57794
PSMD9	0.0221998	0.756275	5.084
PSMF1	0.00904513	0.114126	3.64274
PSMG3	0.0662967	0.648235	3.28756
PSMG3-AS1	0.227572	1.55576	2.77269
PTEN	0.228789	1.26046	2.46134
PTGFRN	0.0405147	0.270098	2.73394
PTMA	0.0284547	0.0987204	1.79108
PTPN1	0.123927	0.409412	1.72325
PTPN18	0.648235	3.24118	2.32175
PTPRF	0.176791	0.90753	2.35924
PTPRG	0.324118	3.24118	3.32153
PUM1	0.410549	9.72354	4.56552
PUM2	0.0281841	0.108039	1.93482
PUS7	0.162059	0.648236	1.99933
PVR	0.0218395	0.135821	2.63116
PWP1	0.0515641	0.648235	3.6495
PXMP2	0.0352302	0.178413	2.33706
PYROXD1	0.298529	3.38008	3.50067
QKI	0.157264	0.85231	2.43744
QPCTL	0.340324	2.10676	2.62969
QRSL1	0.128529	0.372735	1.53532
R3HCC1L	0.343183	1.42612	2.05472
RAB11A	0.0202573	0.304274	3.90222
RAB11B	0.2655	1.02222	1.94451
RAB17	0.00689611	0.0540196	2.95152
RAB21	0.0845524	1.52798	4.17403
RAB23	0.405147	5.83412	3.84767
RAB24	0.0402353	0.412513	3.35468
RAB2A	0.136103	1.2799	3.23232
RAB30-DT	0.122021	0.586499	2.26407
RAB32	0.0943633	0.810294	3.1008
RAB33B	0.381015	1.67425	2.1353
RAB35-AS1	0.129647	1.56657	3.59393
RAB37	0.076263	0.299186	1.97058
RAB3B	0.108039	0.324118	1.58407
RAB3IP	0.2204	1.05338	2.25632
RAB8B	0.0296236	0.116975	1.97775
RABGAP1L	0.0926051	0.405147	2.12808
RABGEF1	0.0710015	0.262798	1.88655
RABL3	0.0294652	0.108039	1.87092
RAC1	0.0487309	0.251554	2.36557
RACK1	0.533461	1.52526	1.51543
RAD1	2.10677	6.3203	1.58492
RAD21	0.0525596	0.199799	1.9245
RAD21-AS1	0.0231512	0.364632	3.97146
RAD51AP1	0.0255882	0.277815	3.43547
RAD51B	0.116975	0.453765	1.95483
RAD9B	0.117861	0.972353	3.04332
RAF1	0.014092	0.141801	3.32173
RALGPS2	0.0909803	2.43088	4.73826
RALY-AS1	0.55984	1.58818	1.50412
RANBP2	0.0154342	0.0562704	1.85949
RASAL2	0.427835	1.62059	1.92114
RASAL2-AS1	0.108039	0.324118	1.58407
RBBP8	0.0700795	2.37686	5.08193
RBM33	0.0253217	0.191229	2.91193
RBPMS	0.493894	2.204	2.15763
RBSN	0.0249321	0.453765	4.18041
RBX1	0.251447	0.973987	1.95322
RC3H1	0.0405147	0.648235	3.99667
RC3H1-DT	0.0810294	0.238824	1.55825
RCC1L	0.0463025	0.972353	4.38935
RCC2	0.324118	2.59294	2.99961
RCCD1-AS1	0.633089	1.9447	1.61892
RCE1	0.351964	1.13088	1.68366
RCN2	0.481546	2.54664	2.4026
RCOR1	0.202573	0.842706	2.05604
RCOR3	0.202574	1.36112	2.74767
REL	0.382565	2.85224	2.89799
REPS1	0.00654782	0.0418216	2.65674
RER1	0.403346	4.59167	3.5086
REST	0.225473	2.34985	3.38096
RFC3	0.0444843	0.267971	2.58801
RFC5	0.126723	0.836433	2.72161
RFX3-DT	0.128728	0.670743	2.38054
RGP1	0.4408	7.29265	4.04794
RHNO1	0.810295	2.36143	1.54302
RHOD	0.0113726	0.0540196	2.23796
RIF1	0.213566	1.01287	2.24516
RIMOC1	0.0107545	0.0410962	1.92422
RNF11	0.847692	2.83032	1.73924
RNF121	0.0437996	0.216078	2.29994
RNF157-AS1	0.648235	5.18589	2.99981
RNF170	0.102353	1.13441	3.46904
RNF216P1	0.0311152	0.172863	2.47014
RNF217-AS1	0.0810294	0.231513	1.51342
RNF4	0.0543821	0.379774	2.80167
RNF43	0.0405147	0.162059	1.99733
RNF7	0.036013	0.142612	1.98251
RNPS1	0.378137	1.13441	1.58471
RNU5B-1	0.0188244	0.181368	3.2614
RNU5E-1	0.00686995	0.0481459	2.79119
RO60	0.0272368	0.122702	2.16742
RPA1	0.0301505	0.2755	3.18755
RPAP1	0.124661	0.648235	2.37758
RPL21	0.87659	2.57905	1.55675
RPL22L1	0.00913006	0.277815	4.91216
RPL3	0.0129647	0.162059	3.63366
RPN1	0.216078	0.972353	2.16941
RPP25L	0.0810294	0.324118	1.99867
RPS14	0.0102353	0.0368315	1.83728
RPS15A	0.0648235	0.216078	1.73541
RPS25	0.0194471	0.108039	2.46787
RPS26	1.26323	5.7909	2.19658
RPS6KB1	0.070641	0.669843	3.24342
RPS6KC1	0.324118	2.10677	2.70006
RPUSD3	0.0627324	0.518588	3.04529
RRN3P3	0.00600218	0.0617367	3.34107
RSL24D1	0.0216078	0.176791	3.02658
RTCA	0.084888	0.848879	3.3204
RTN4IP1	0.0113725	0.0648235	2.50056
RUNDC1	0.0623303	3.24118	5.69817
RWDD1	0.0360131	0.224389	2.63605
S100A16	0.0997285	0.815358	3.03009
S100A2	0.0475478	0.299185	2.65104
SAE1	0.117434	0.426155	1.85864
SAFB	0.0193766	0.105177	2.43438
SANBR	0.0810294	1.13441	3.8057
SARM1	0.324118	2.1878	2.75451
SART1	0.0166214	0.0997285	2.57776
SAXO4	0.0290874	0.115945	1.99126
SAYSD1	0.0324118	0.243088	2.90304
SCAF4	0.0810294	0.463025	2.51311
SCAF8	0.261887	0.950745	1.85971
SCAMP4	0.0829137	1.40451	4.08068
SCFD2	0.021974	0.129647	2.55528
SCMH1-DT	1.45853	4.21353	1.53045
SCYL3	0.00720261	0.0223529	1.62042
SDHAF2	0.0290874	0.115945	1.99126
SEC24B	0.129647	0.729265	2.49094
SEC62	0.440526	1.97406	2.16361
SELENOP	0.432157	1.69105	1.96804
SEPHS1	0.00635524	0.180065	4.80271
SEPTIN2	0.205878	0.718215	1.80213
SERPINA3	0.180065	1.14985	2.67417
SERPINB9P1	0.194471	0.729265	1.90635
SERTAD1	0.432157	1.29647	1.58474
SETD9	6.998	23.4754	1.74612
SF3A2	0.140778	0.639355	2.18239
SF3B3	0.00817401	0.0250606	1.60451
SFT2D2	0.0434792	0.151639	1.79988
SFT2D3	2.59294	10.2421	1.98181
SGPL1	0.416723	1.45853	1.80711
SGSH	0.108039	0.324118	1.58407
SH3BP4	0.432157	4.21353	3.2851
SH3D19	7.13059	22.5262	1.6595
SH3GLB1	0.364632	1.53956	2.0777
SH3TC1	0.246611	2.39847	3.28128
SHB	0.324118	1.94471	2.58459
SHF	0.108039	0.324118	1.58407
SIAH2	0.0294652	0.270098	3.19204
SIPA1L3	0.486176	1.78265	1.87425
SIRT1	0.0948636	0.405147	2.09336
SIVA1	0.0360131	0.486176	3.75118
SKIC2	0.162059	1.40451	3.11469
SLC18B1	0.259294	1.29647	2.32148
SLC1A4	0.59837	4.66729	2.96327
SLC1A5	0.0216078	0.216078	3.31593
SLC20A2	0.0452257	0.388941	3.10152
SLC22A9	0.123473	0.429345	1.79711
SLC25A12	0.00600217	0.0810294	3.73283
SLC25A16	0.0810294	2.4849	4.93688
SLC25A21-AS1	0.315588	1.78265	2.49753
SLC25A25	0.18754	0.972353	2.37366
SLC25A28	0.125227	2.47316	4.30264
SLC25A35	0.132048	0.907529	2.77995
SLC29A3	0.0135049	0.648235	5.57454
SLC38A6	0.141801	0.810294	2.51373
SLC39A1	0.0540196	1.29647	4.58241
SLC39A10	0.316212	1.29647	2.03528
SLC39A9	0.139446	0.529392	1.92387
SLC3A2	0.132889	0.650427	2.2903
SLC6A6	0.0116799	0.218885	4.21643
SLC7A2	0.253657	1.45853	2.52309
SLC7A5	0.0231512	0.396144	4.09101
SLMO2-ATP5E	0.324118	1.62059	2.32157
SMAD1	0.124661	1.62059	3.69937
SMAP1	0.0972353	0.705432	2.85768
SMC4	4.53765	18.4747	2.02551
SMIM19	2.70471	44.8903	4.05281
SMIM20	0.576209	1.74888	1.6016
SMIM32	1.52526	10.0477	2.71965
SMIM7	0.0249321	0.265187	3.4057
SMPD4	0.122053	0.369608	1.5977
SMPDL3A	0.246947	1.53956	2.63975
SMTN	0.126046	1.45853	3.53145
SNAP23	0.00856698	0.030386	1.81455
SNAPIN	0.120602	1.94471	4.01011
SNHG1	0.0162059	0.19447	3.57683
SNHG20	12.9769	38.8941	1.5836
SNRNP27	0.0661464	3.0251	5.51304
SNRNP35	0.189069	0.548507	1.5361
SNRPC	0.0959766	0.303539	1.6601
SNRPD1	0.0129647	0.0448778	1.78354
SNRPF	0.0195776	0.0731878	1.89702
SNX1	0.0335975	0.198072	2.55604
SNX11	0.0810294	2.05274	4.66126
SNX3	0.00720261	0.0285986	1.9745
SOAT1	0.0189266	0.0617367	1.70045
SOBP	0.274253	1.62059	2.5625
SOD2-OT1	0.0297226	0.0972353	1.70656
SON	0.0240874	0.0872624	1.85276
SPATA1	0.0240087	2.52092	6.70831
SPATS2L	0.810924	2.92559	1.85096
SPECC1	0.560636	2.37011	2.07962
SPECC1L	0.0418217	0.186368	2.15316
SPECC1L-ADORA2A	0.0418217	0.186368	2.15316
SPIN1	1.29647	12.1544	3.22872
SPMIP4	0.19447	1.13441	2.54371
SPOPL	0.142612	0.486176	1.76867
SPRED2	0.108039	0.432157	1.999
SPTAN1	0.0498642	0.270098	2.43505
SPTBN1	0.211381	1.94471	3.20102
SRCAP	0.128424	0.802577	2.64278
SRD5A3	0.113064	0.810294	2.8402
SREK1	0.303341	1.05815	1.80219
SREK1IP1	0.162059	0.810295	2.32122
SRP14	0.00904513	0.0294652	1.69283
SRP14-DT	0.0190657	0.0576209	1.59057
SRP9	0.0780856	0.268118	1.77843
SRPK1	0.991419	4.53765	2.19426
SRRM1	0.0311776	0.355484	3.50699
SRSF11	0.036013	0.226882	2.65199
SRSF8	1.17979	10.3718	3.13595
SSH1	0.0202573	0.162059	2.99379
SSNA1	0.40731	1.9041	2.22463
SSX2IP	0.18521	1.78265	3.26609
ST7-AS1	0.900327	2.83603	1.65524
STAM	0.0494081	0.432157	3.12615
STAP2	0.324118	1.62059	2.32157
STARD3NL	0.0852941	0.364632	2.09463
STBD1	0.0122309	0.0825027	2.74392
STIM1-AS1	0.0648235	0.224389	1.78983
STK11IP	0.0180065	0.108039	2.57831
STK17A	0.332308	1.27951	1.94468
STK39	0.251333	1.08039	2.10344
STMN1	0.162059	0.648235	1.99933
STMP1	0.0441978	0.162059	1.8721
STPG4	0.162059	1.29647	2.99922
STXBP2	0.195358	0.643527	1.71936
STXBP4	0.0088281	0.274253	4.94154
SUB1	0.097631	0.371549	1.92705
SUCLG2	0.259294	1.45853	2.4914
SUMF1	0.361516	3.67334	3.3446
SUMO2	0.0463025	1.29647	4.80435
SUN1	0.828301	17.1782	4.37412
SUPT6H	0.108455	0.585686	2.43195
SUPT7L	0.0432157	0.324118	2.904
SUSD6	0.0648235	0.37042	2.51274
SUV39H2	0.583412	7.77883	3.73674
SWT1	5.26691	25.2812	2.26301
SYNJ2	0.443529	4.42961	3.31979
SYNM-AS1	0.0480174	0.231513	2.26708
SZRD1	0.8283	2.4849	1.58485
TADA3	0.135049	0.416722	1.62488
TAF13	0.0553372	0.270098	2.28509
TAF1A-AS1	0.0607721	0.264096	2.11776
TAF6	0.283603	3.24118	3.51411
TAFA2	0.0810294	1.37273	4.08079
TALDO1	0.0147326	0.080805	2.44746
TANGO2	0.231513	2.26882	3.29222
TANGO6	0.0072026	0.0360131	2.30604
TASOR2	0.368882	1.08904	1.56156
TAX1BP1	0.0943327	0.325574	1.78607
TBC1D14	0.148223	0.676419	2.18939
TBC1D8	0.0360131	0.648235	4.16615
TBCC	0.648235	2.91706	2.16975
TBCCD1	0.0085294	0.0883957	3.35827
TBCE	0.0365427	0.188665	2.365
TBCEL	0.37042	4.05147	3.45086
TBL3	0.324117	4.86177	3.90648
TCERG1	0.625084	2.39847	1.93982
TCP1	0.0360131	0.324118	3.16637
TCP11L2	0.113134	0.332023	1.55241
TDG	0.184498	0.567206	1.61974
TDRD3	0.453765	2.91706	2.68423
TELO2	2.65505	7.93758	1.57993
TET2	0.140451	0.432157	1.6208
TFAP2A-AS2	0.130692	0.777882	2.57246
TFAP4	0.0589305	1.29647	4.4571
TFRC	0.108039	0.324118	1.58407
TGFB2-AS1	1.38805	5.83412	2.07137
TGFBI	0.0173634	0.0563683	1.6931
TGFBR2	0.247855	2.02573	3.03037
THAP4	0.0540196	1.40451	4.69788
THBS1	2.45146	11.02	2.16836
THNSL1	0.0585974	0.500909	3.09347
THUMPD3-AS1	0.0463025	0.324118	2.80469
TIA1	0.092605	0.356529	1.94371
TIGD7	0.0125871	0.0384139	1.60202
TIMM17A	0.17787	0.519939	1.54699
TIMM29	0.748557	5.51	2.8797
TIMMDC1	0.0474999	0.208361	2.13075
TIPIN	0.0219741	0.180065	3.0289
TIPRL	0.187747	0.58	1.62674
TJAP1	0.11297	0.424706	1.90958
TJP2	0.165005	0.567206	1.78074
TLCD4	0.729265	2.29552	1.65417
TLK1	0.648235	8.75118	3.75468
TM2D3	0.0381315	0.216078	2.49939
TM9SF2	0.0220091	0.0690375	1.64483
TMA16	0.0881095	0.252091	1.51551
TMCC1	0.324118	1.62059	2.32157
TMCO1-AS1	0.0141605	0.086291	2.59886
TMEM104	0.486177	8.10295	4.05862
TMEM105	0.162059	2.26882	3.80653
TMEM117	0.0209108	0.20019	3.25289
TMEM123-DT	0.0648235	0.30386	2.22707
TMEM129	0.0527632	0.972353	4.20129
TMEM141	1.62059	8.75118	2.43289
TMEM169	0.180065	0.972353	2.43231
TMEM177	0.365151	2.12992	2.5439
TMEM192	1.18843	4.53765	1.9328
TMEM202-AS1	0.0273104	0.112062	2.03279
TMEM217	0.0377279	0.376395	3.31511
TMEM217B	0.0352999	0.388941	3.45811
TMEM220	0.0648235	0.486177	2.90497
TMEM250	0.0694538	0.486176	2.80558
TMEM260	0.0927522	0.521734	2.49058
TMEM37	0.46817	6.80647	3.86152
TMEM44-AS1	0.100182	0.471689	2.23409
TMEM79	0.0648235	0.252091	1.95771
TMEM86B	0.243088	1.94471	2.99948
TMEM87B	0.842706	9.0753	3.42869
TMT1A	0.0405147	0.972353	4.58156
TMX4-AS1	0.100836	0.353583	1.80901
TNFRSF10B	0.167071	0.756275	2.17778
TNKS	0.411076	1.23754	1.58976
TNRC18	0.324117	1.08039	1.73665
TNRC6B	0.00769875	0.0373226	2.2626
TOB1-AS1	0.0259294	0.0958658	1.88238
TOMM40	1.24661	10.939	3.1333
TOP2B	0.0166214	0.0694538	2.05643
TOP6BL	0.0810293	0.259294	1.67685
TOR3A	0.19447	0.972353	2.32134
TOX4	0.0313936	0.0979049	1.6378
TP53INP1	0.259294	0.972353	1.90648
TPCN2	0.0441979	0.842706	4.24989
TRAF2	0.648235	3.40324	2.39214
TRAPPC2L	0.506802	3.88941	2.93981
TRIB1	0.076652	0.263723	1.78129
TRIM23	7.92615	24.741	1.6422
TRIM24	0.810294	3.78137	2.22225
TRUB1	0.0165507	0.0690742	2.05466
TSACC	0.108039	1.24245	3.52234
TSC1	0.216078	7.13059	5.04375
TSNAX	0.0556321	0.756274	3.76252
TSNAX-DISC1	0.0633613	0.756274	3.57515
TSPAN8	0.216078	1.62059	2.90631
TTC14	0.262052	0.939941	1.84232
TTC19	0.226128	0.664857	1.55548
TTC23	0.208362	0.713059	1.77444
TTC28	0.108039	0.810295	2.90573
TTC39C	0.8283	3.99745	2.27072
TTC41P	0.102713	0.324118	1.65694
TTF2	0.0511764	0.176791	1.7865
TTLL4	0.112737	0.486176	2.10754
TTLL5	0.158458	0.576209	1.86184
TUBA1C	0.00647515	0.040097	2.61199
TUFT1	0.0498642	0.33012	2.72446
TXNDC11	0.0202573	0.432157	4.40827
TXNDC5	0.147326	0.518588	1.81487
UBAP1	0.447591	2.13377	2.2529
UBE2B	0.832193	3.20516	1.94528
UBE2F-SCLY	0.0648235	0.37042	2.51274
UBE2L3	0.0577635	3.60581	5.96156
UBE2Q1	0.0747964	0.216078	1.52925
UBE2R2	4.32157	63.203	3.87033
UBE2T	0.00544735	0.0432157	2.96502
UBE2V2	0.22515	0.910389	2.01511
UBE2Z	0.0357746	0.18308	2.35223
UBE3A	0.0085294	0.162059	4.232
UBE3B	0.145853	0.465038	1.67216
UBN1	0.36501	2.01176	2.46213
UBN2	0.810294	10.3718	3.67791
UBQLN1-AS1	0.271354	0.864314	1.67101
UBR3	0.112382	0.482728	2.10181
UBTD2	0.486176	1.62059	1.73676
UBXN4	0.317153	2.41193	2.92654
UCKL1	0.108039	0.648235	2.58385
UFC1	0.00997284	0.0347579	1.79102
UFM1	0.0523726	0.273474	2.38229
UFSP1	19.7712	106.959	2.43558
UGGT1	0.128139	0.513186	2.00092
UHMK1	0.12918	0.509648	1.97928
UHRF2	0.116682	0.426155	1.8679
UIMC1	0.108039	0.324118	1.58407
UQCRC2	0.00973101	0.0455372	2.2148
USE1	0.0726469	1.102	3.92123
USP15	0.0152526	0.138907	3.17861
USP3	0.242301	0.967656	1.99725
USP39	0.042647	0.162059	1.92351
USP46	0.0240087	0.486177	4.33415
USP8	0.022538	0.22148	3.29101
UVRAG	0.0527633	0.18521	1.8096
VAMP5	0.092605	2.59294	4.80585
VAPA	0.416323	1.64652	1.98338
VAPB	0.0766494	0.232737	1.6011
VAX2	0.324118	0.972353	1.58467
VCF1	0.0202573	0.0648235	1.67319
VHL	0.162059	0.750101	2.20987
VIL1	0.123927	0.567206	2.19347
VOPP1	0.108039	0.324118	1.58407
VPS13B	1.11126	5.67206	2.35157
VPS16	0.0270098	0.252091	3.21763
VPS26A	0.116895	0.702255	2.58576
VPS28	0.162059	0.648235	1.99933
VPS37A	0.0758572	0.583412	2.9415
VPS51	0.312331	2.37686	2.92751
VPS72	0.0810295	0.324118	1.99866
VRK2	0.0892498	2.36143	4.72411
VTN	1.07512	4.35814	2.01911
WASL	0.0413766	1.53956	5.21417
WASL-DT	0.0734328	0.324118	2.1405
WBP2	0.775368	2.64612	1.77079
WDR1	0.0308683	0.136471	2.14078
WDR6	0.299185	1.94471	2.70003
WDR62	0.439127	1.45081	1.72392
WDR75	0.00605827	0.0239809	1.96729
WDR83	0.0270098	0.216078	2.99534
WFS1	0.0264586	0.265187	3.3203
WHAMMP3	0.19447	4.53765	4.54361
WNT5B	0.486177	1.52119	1.64545
WWC2	0.263346	0.864314	1.71422
WWC2-AS2	0.0249321	0.108039	2.11104
WWOX	0.0190657	0.324118	4.08036
WWP2	0.208361	2.91706	3.80671
XNDC1N-ZNF705EP-ALG1L9P	0.0810294	0.324118	1.99867
XPNPEP3	0.0710783	0.972353	3.77212
XRN2	0.299186	0.886737	1.56715
YARS1	0.46817	2.59294	2.46923
YARS2	0.332023	1.47529	2.15131
YBX3	0.457578	1.89069	2.04658
YEATS4	0.157598	0.740841	2.23219
YIF1A	0.810294	2.91706	1.84787
YIPF2	0.0553371	2.26882	5.35501
YJU2	0.0120513	0.348427	4.84208
YTHDF1	0.162059	1.62059	3.32113
YTHDF3	0.266497	1.04602	1.97231
YTHDF3-DT	0.0101287	0.0498642	2.28828
YWHAQ	0.486176	1.94471	1.99978
YY1AP1	0.0228789	0.0735835	1.68103
ZBTB25	0.0810294	0.745471	3.20005
ZBTB26	0.00648234	0.432157	6.03714
ZC3H12A	0.972353	15.8818	4.02961
ZC3H4	0.0276062	0.146706	2.40563
ZC3H7A	0.0540196	0.324118	2.58274
ZCCHC10	0.162059	1.62059	3.32113
ZCCHC4	0.0289391	0.192719	2.73118
ZDHHC24	0.615824	4.21353	2.77424
ZDHHC5	0.346934	1.30514	1.91117
ZDHHC7	0.010987	0.162059	3.87046
ZEB1	0.756274	2.26882	1.58484
ZFAND6	0.197633	3.66253	4.21126
ZFC3H1	0.0308683	0.104554	1.75676
ZFHX2	0.0648235	0.259294	1.99833
ZFP1	0.0324117	0.648235	4.31771
ZFP14	0.0190657	0.0563683	1.55891
ZFP62	0.0324118	0.324118	3.31793
ZFPL1	1.62059	5.29393	1.70776
ZFYVE19	0.324118	1.34277	2.05029
ZFYVE21	0.0945344	0.324118	1.77653
ZFYVE9	0.108039	0.549093	2.34442
ZKSCAN1	0.138512	4.82935	5.12274
ZKSCAN3	0.0747964	1.29647	4.11366
ZMIZ1	0.216078	0.648235	1.58452
ZMPSTE24	0.0176791	0.0720261	2.02034
ZMYM2	0.256593	1.11126	2.11421
ZMYND15	0.324118	1.94471	2.58459
ZNF134	0.0216078	0.294652	3.76322
ZNF141	0.069934	0.336348	2.26426
ZNF143	0.107471	0.349841	1.70183
ZNF148	0.0388941	0.648236	4.05541
ZNF181	0.121544	0.970435	2.99611
ZNF2	0.140921	3.07912	4.44859
ZNF207	0.0557014	0.219544	1.97679
ZNF24	0.0447058	0.324118	2.8552
ZNF252P-AS1	0.129647	0.648236	2.32104
ZNF267	0.0162059	0.0495466	1.6063
ZNF274	0.113021	0.379156	1.74531
ZNF277	0.0664856	2.26882	5.09065
ZNF295-AS1	0.324118	2.85224	3.13711
ZNF317	0.026002	0.113562	2.12251
ZNF384	0.216078	1.62059	2.90631
ZNF410	0.145934	0.504183	1.78793
ZNF48	0.162907	0.648235	1.9918
ZNF487	0.432156	1.29647	1.58474
ZNF496	0.108039	0.648236	2.58385
ZNF507	0.601933	7.53574	3.64585
ZNF549	0.432157	1.29647	1.58474
ZNF568	0.388941	1.18843	1.61119
ZNF569	0.0324118	0.270098	3.05498
ZNF574	0.152526	5.18588	5.08655
ZNF586	0.0300109	0.160007	2.41068
ZNF606	0.324118	2.26882	2.80697
ZNF606-AS1	1.45853	5.18588	1.83
ZNF628	0.998633	5.34303	2.41952
ZNF638	0.149781	0.813601	2.44068
ZNF644	0.416723	2.91706	2.80706
ZNF670	0.0106268	0.148554	3.79267
ZNF670-ZNF695	0.0139405	0.237686	4.082
ZNF687-AS1	0.227572	1.62059	2.83158
ZNF695	0.388941	1.62059	2.05861
ZNF697	0.0810294	0.540196	2.73545
ZNF701	0.0254765	0.101789	1.99411
ZNF714	0.0387006	0.180065	2.21517
ZNF749	0.0244617	0.0982175	2.00104
ZNF764	0.0864314	0.864314	3.32043
ZNF772	0.129647	0.463025	1.8357
ZNF783	0.583412	2.26882	1.95917
ZNF791	0.103128	0.415276	2.00858
ZNF805	0.202574	1.76791	3.1249
ZNF84	0.235722	2.51191	3.41308
ZNRF3-AS1	0.0684248	1.06959	3.96442
ZRANB2-DT	0.00810294	0.0243088	1.57319
ZSCAN2	0.371384	1.18303	1.67123
ZWILCH	0.0149823	0.0426471	1.50297

## Sheet: Group II
gene.value	PRR_EV	PRR_KO	log2FC_PI	log2FC_PRR
A1CF	36.3012	43.1077	-0.246949	0.247927
ABALON	4.69971	2.43088	0.950763	-0.951061
ABCC10	1.45853	0.999363	0.545367	-0.545388
ABCC3	2.30934	1.94471	0.247874	-0.247915
ABCC6P1	1.72863	3.72735	-1.10823	1.10848
ABCD3	0.310977	0.607077	-0.965028	0.964844
ABCF3	1.71062	2.17622	-0.347235	0.347284
ABHD18	0.182836	0.463025	-1.3405	1.34007
ABHD8	0.285986	0.324118	-0.180568	0.180514
ABL1	0.192716	0.282471	-0.551618	0.551393
ABLIM2	11.5062	20.5815	-0.83763	0.838932
ABLIM3	0.184624	0.292342	-0.66305	0.662777
ABRACL	0.175534	0.234706	-0.419095	0.418897
ABT1	1.95424	4.6817	-1.26003	1.26038
ACAD10	0.0851075	0.230484	-1.43729	1.43624
ACAP3	0.235722	0.351127	-0.574892	0.574708
ACAT2	0.723208	1.10289	-0.608748	0.608734
ACLY	0.648235	1.29647	-0.999906	0.999889
ACO2	0.405147	0.231512	0.807331	-0.807089
ACSL3	0.163203	0.304939	-0.901835	0.901444
ACSS3	0.359157	0.668492	-0.89625	0.896109
ACTB	0.810294	1.21544	-0.584904	0.584903
ACTG1	0.972353	1.51255	-0.637353	0.637378
ACTL6A	0.0574676	0.0425609	0.433218	-0.432343
ACTMAP	0.384212	0.334745	0.198837	-0.198789
ACTN4	0.0386762	0.0962224	-1.31492	1.3127
ACTR2	0.0507515	0.0353921	0.520018	-0.51879
ACTR3	0.068338	0.0634516	0.107031	-0.106869
ACTR3-AS1	3.22211	7.6978	-1.25579	1.25641
ACTR3C	0.0670588	0.0537	0.320504	-0.319972
ACTR5	0.37042	0.891323	-1.26671	1.26656
ACVR1B	0.324118	0.648235	-0.999953	0.999777
ACVR2A	0.670588	0.34905	0.941949	-0.941797
ACYP1	1.62059	3.5653	-1.13722	1.13746
ACYP2	1.37364	0.639706	1.10242	-1.10241
ADAM17	0.225473	0.0864314	1.38331	-1.3823
ADAM3A	0.972354	1.29647	-0.414991	0.415
ADAR	0.00900326	0.0162059	-0.847996	0.840936
ADCK1	0.324118	0.540196	-0.736934	0.736788
ADCY6-DT	0.648235	0.648235	0	0
ADD1	0.463025	0.297108	0.640081	-0.639931
ADIPOR2	0.317884	0.313662	0.0192898	-0.0192843
ADK	0.729265	1.51255	-1.05235	1.05237
ADNP2	9.30473	10.127	-0.122046	0.122163
ADO	2.74027	5.02383	-0.874141	0.874447
ADPRS	2.43088	4.86177	-0.999649	0.99997
ADRM1	5.24675	13.3386	-1.34495	1.3461
ADSL	0.0879957	0.202574	-1.20292	1.20201
AFDN-DT	0.833445	0.324117	1.3625	-1.3623
AFF1	2.2148	1.67461	0.403277	-0.403334
AFF1-AS1	0.152526	0.352128	-1.20701	1.20651
AFF3	0.324118	0.648235	-0.999953	0.999777
AFF4	0.180903	0.37042	-1.03392	1.03354
AFG2B	0.0540196	0.148919	-1.46296	1.46127
AGBL3	0.390335	1.04627	-1.42238	1.42225
AGFG1	0.315662	0.377276	-0.257229	0.257164
AGFG2	0.0918333	0.145437	-0.663301	0.662731
AGGF1	0.207435	0.0883956	1.2306	-1.22968
AGMO	1.29647	1.13441	0.192621	-0.192629
AGO3	0.367333	0.634143	-0.78768	0.787553
AGPAT2	0.0926051	0.129647	-0.48542	0.484981
AGPAT3	1.44011	0.857958	0.74712	-0.747136
AGTPBP1	0.648235	0.648236	-1.99902e-06	1.99884e-06
AHCTF1	0.810295	0.972353	-0.26301	0.263004
AHCYL1	0.293731	0.656338	-1.15989	1.15967
AHI1	0.0341176	0.036013	-0.0780015	0.0777799
AHI1-DT	2.204	1.42612	0.627921	-0.627997
AHR	0.369377	1.00594	-1.44529	1.44514
AIF1L	0.129647	0.162059	-0.321924	0.321706
AKIRIN1	0.290875	0.367333	-0.33668	0.336588
AKIRIN2	0.19447	0.162059	0.26303	-0.262886
AKR1A1	0.0787705	0.16591	-1.07466	1.07371
AKT1S1	1.71319	1.55577	0.139042	-0.139056
AKT2	0.324118	0.259294	0.32192	-0.321818
ALB	0.102946	0.170009	-0.723709	0.723166
ALCAM	1.54136	0.741625	1.05533	-1.05534
ALDH16A1	1.29242	2.85629	-1.14384	1.14401
ALDH1A2	0.259294	0.19447	0.415029	-0.414853
ALDH2	0.153767	0.218283	-0.505443	0.505175
ALDH4A1	0.19447	0.162059	0.26303	-0.262886
ALDOA	0.601933	1.02109	-0.762368	0.76233
ALG3	0.336122	0.576209	-0.777573	0.777429
ALG5	0.175094	0.13119	0.416462	-0.416193
ALPK3	1.76464	2.91706	-0.724976	0.72511
ALYREF	0.0324118	0.0810294	-1.32192	1.31926
AMD1	0.190716	0.129381	0.559784	-0.559434
AMN1	0.926051	0.648236	0.514533	-0.514507
AMOTL1	0.178265	0.405147	-1.18439	1.18397
AMZ1	6.15824	3.24118	0.925578	-0.925978
ANAPC11	0.255642	0.540196	-1.07932	1.07906
ANAPC13	0.190657	0.307557	-0.689853	0.689583
ANAPC4	0.126351	0.0810294	0.640913	-0.640282
ANAPC7	0.324118	0.648235	-0.999953	0.999777
ANGPTL8	0.138907	0.223529	-0.686329	0.685948
ANK2	0.27685	0.486176	-0.812344	0.81215
ANKDD1B	0.324118	0.144052	1.1699	-1.16937
ANKEF1	0.288105	0.129647	1.15198	-1.15139
ANKH	0.0648235	0.0405147	0.678069	-0.67674
ANKIB1	0.221765	0.19447	0.189474	-0.189387
ANKMY1	0.324118	0.140921	1.20161	-1.20106
ANKMY2	1.62059	0.756275	1.09941	-1.09943
ANKRD13A	2.10676	0.972353	1.11531	-1.1154
ANKRD17-DT	0.115439	0.259294	-1.16744	1.16676
ANKRD18CP	0.283603	0.486177	-0.777579	0.777397
ANKRD27	0.648235	0.486176	0.415014	-0.414964
ANKRD28	0.391177	0.648235	-0.728659	0.72855
ANKRD37	2.65187	2.39847	0.144859	-0.14489
ANKRD42-DT	0.486176	0.648235	-0.415015	0.414964
ANKRD44	0.324118	0.324118	0	0
ANKRD52	4.21354	4.05147	0.0565618	-0.0565838
ANKS1A	0.972353	0.615824	0.658912	-0.658877
ANO6	0.432157	0.208361	1.05244	-1.05211
ANO8	0.324118	0.648235	-0.999953	0.999777
ANP32B	0.08816	0.166286	-0.915464	0.914707
ANXA11	0.972353	1.45853	-0.584893	0.584913
ANXA3	0.339192	0.324117	0.0655855	-0.0655679
ANXA5	1.78265	1.62059	0.13748	-0.137495
AOPEP	1.62059	1.29647	0.321881	-0.321906
AP1AR	0.179299	0.379681	-1.08239	1.082
AP1B1	0.324118	0.162059	0.999977	-0.999555
AP1M1	0.206257	0.129647	0.669842	-0.66944
AP2M1	0.108039	0.0648235	0.736959	-0.736076
AP3D1	0.0868171	0.0463025	0.906883	-0.905438
AP4M1	1.102	0.439874	1.32487	-1.32476
AP4S1	1.08039	1.62059	-0.584884	0.584917
AP5B1	0.648236	0.432157	0.584932	-0.584852
AP5M1	0.122941	0.184567	-0.586167	0.585785
AP5S1	7.09008	10.0477	-0.502559	0.502979
AP5Z1	0.0499681	0.13224	-1.40407	1.40229
APAF1	0.0694537	0.104181	-0.58496	0.584273
APC	0.00926049	0.0170588	-0.881355	0.874293
APEX1	2.08908	0.884861	1.23917	-1.23925
APH1A	0.364632	0.777883	-1.09305	1.0929
APOC1	1.54712	3.21746	-1.0561	1.05629
APP	2.26882	0.972354	1.22221	-1.22231
APPBP2	0.138908	0.216078	-0.637419	0.63706
APTR	0.162059	0.0720261	1.16991	-1.16881
ARAP2	0.231513	0.324118	-0.485414	0.485249
ARF1	1.519	1.28104	0.245775	-0.245792
ARF6	6.97807	11.6142	-0.734324	0.734984
ARFGAP2	1.94471	3.24118	-0.736779	0.736936
ARFGEF3	0.694538	1.18843	-0.774862	0.774847
ARFRP1	0.453765	0.810294	-0.83645	0.836361
ARGLU1	1.94471	1.13441	0.777491	-0.777555
ARHGAP12	0.518588	0.231513	1.16346	-1.16315
ARHGAP24	0.0981906	0.250319	-1.35009	1.34922
ARHGAP29-AS1	0.0104554	0.0281841	-1.43063	1.42201
ARHGAP35	0.526691	0.563683	-0.0979213	0.0979087
ARHGEF16	4.21353	2.91706	0.530327	-0.530499
ARHGEF17	0.199457	0.0864313	1.20643	-1.20551
ARHGEF18	1.45853	2.67397	-0.874293	0.874424
ARHGEF28	1.72863	1.21544	0.508073	-0.508112
ARID1B	1.85322	2.23853	-0.272463	0.272505
ARID3A	0.441979	0.396144	0.157946	-0.157915
ARID4B	0.648235	0.324118	0.999953	-0.999777
ARID5A	0.412514	0.324118	0.347911	-0.347829
ARK2N	0.405147	0.486176	-0.263023	0.262975
ARL4A	2.60659	1.3011	1.00224	-1.00237
ARL6IP4	8.4282	21.4054	-1.34281	1.34467
ARL6IP6	13.5032	10.7282	0.331498	-0.331895
ARL8B	0.216078	0.377544	-0.805066	0.804804
ARMC5	9.72957	6.44844	0.592952	-0.593418
ARMC8	0.0697861	0.0762629	-0.128042	0.127868
ARMH1	0.324118	0.648235	-0.999953	0.999777
ARMH3	0.0607721	0.0405147	0.584961	-0.583779
ARPC1A	0.0396878	0.0648235	-0.707816	0.706413
ARPC3	0.18521	0.129647	0.514566	-0.51424
ARPC4	2.36606	2.59294	-0.13207	0.132097
ARRB2	0.668493	1.18843	-0.83	0.829981
ARRDC3-AS1	1.50201	0.988558	0.60342	-0.603445
ART4	0.648235	0.648235	0	0
ARV1	0.0762629	0.204706	-1.42448	1.42331
ARVCF	0.810294	0.518589	0.643813	-0.643755
AS3MT	0.607721	0.270098	1.16988	-1.16963
ASAH1	3.24118	1.3775	1.2342	-1.2344
ASAP1	3.33379	2.51191	0.408256	-0.408361
ASAP2	0.162059	0.351127	-1.11545	1.115
ASB1	1.2179	3.20066	-1.39369	1.3939
ASB3	0.0648235	0.0648235	1.66952e-06	-1.66696e-06
ASCC1	16.2059	17.1782	-0.0839235	0.0840631
ASDURF	0.0774012	0.126046	-0.703512	0.702801
ASH1L	0.0310797	0.0254472	0.288465	-0.287442
ASH1L-AS1	4.76644	5.51867	-0.211301	0.211405
ASH2L	0.227572	0.511765	-1.16912	1.16881
ASL	1.21752	1.6566	-0.444219	0.444251
ASNSD1	0.0774012	0.126046	-0.703512	0.702801
ASPSCR1	0.528823	0.792288	-0.5832	0.583148
ASS1	0.354986	0.426471	-0.264675	0.264617
ASXL1	1.84867	1.76634	0.0657117	-0.06572
ATAD2	1.29647	3.5653	-1.45911	1.45936
ATAD2B	0.0845523	0.0948636	-0.166009	0.165825
ATE1	1.78265	1.29647	0.459362	-0.459402
ATE1-AS1	0.648235	0.598371	0.115471	-0.115459
ATF1	0.0405147	0.0632425	-0.642446	0.641173
ATF3	7.57899	7.35606	0.0430391	-0.0430707
ATF4	62.5817	127.054	-1.01242	1.02163
ATF6-DT	0.217917	0.135821	0.682065	-0.681677
ATF7IP	0.506078	1.02872	-1.02335	1.02328
ATG10	0.123205	0.0627324	0.973768	-0.97265
ATG4D	0.259294	0.295933	-0.190677	0.190614
ATG9A	0.0202573	0.0180065	0.169924	-0.169039
ATIC	5.14407	2.75332	0.901395	-0.901715
ATL3	0.972353	0.432156	1.16985	-1.16974
ATMIN	0.601933	0.648235	-0.106909	0.106898
ATP11A	0.61877	1.00476	-0.699328	0.699294
ATP11B	1.55079	1.52335	0.0257479	-0.0257502
ATP13A1	0.037042	0.0810294	-1.12928	1.12717
ATP13A3	0.55563	1.29647	-1.22229	1.22224
ATP1B1	0.317815	0.700366	-1.13987	1.13967
ATP2A2	1.51306	3.16858	-1.06612	1.06631
ATP2B1	0.486177	0.540196	-0.151995	0.151973
ATP2C1	0.324118	0.324118	1.73432e-07	-1.73384e-07
ATP5F1A	0.162059	0.108039	0.584955	-0.584518
ATP5F1D	0.411617	0.414618	-0.0104803	0.0104782
ATP5MF	0.453764	0.486176	-0.0995314	0.0995149
ATP5MF-PTCD1	0.453764	0.486176	-0.0995314	0.0995149
ATP5MK	0.0565919	0.0216078	1.38904	-1.38493
ATP5PD	0.324118	0.648235	-0.999953	0.999777
ATP5PF	0.594216	1.13441	-0.932806	0.932768
ATP6V0B	1.41994	3.05597	-1.10556	1.10574
ATP8B1	0.972353	0.648235	0.584916	-0.584888
ATP9A	0.972353	1.29647	-0.414991	0.415
ATRAID	0.113786	0.25147	-1.14405	1.14337
ATRN	0.30526	0.228137	0.420127	-0.419979
ATXN10	0.277815	0.567854	-1.03135	1.03113
ATXN1L	0.0482315	0.126068	-1.38614	1.38431
ATXN2	0.0190657	0.0329611	-0.78978	0.786605
ATXN2-AS	0.412513	0.856597	-1.05411	1.05399
ATXN7L3-AS1	0.972353	1.29647	-0.414991	0.415
ATXN7L3B	1.79299	1.57683	0.185308	-0.185328
AURKA	0.702255	1.94471	-1.46931	1.46935
AURKB	1.78265	0.972353	0.874353	-0.874402
AVL9	0.153858	0.188339	-0.291722	0.291555
AXDND1	0.144052	0.162059	-0.169922	0.169814
AZIN1	0.540196	0.486176	0.151995	-0.151973
B3GALT1	1.62059	1.13441	0.514503	-0.514535
B3GLCT	2.59294	3.24118	-0.321835	0.321918
B4GALT2	1.45853	2.26882	-0.637313	0.637395
B4GALT6	0.324118	0.324118	0	0
B4GAT1-DT	0.00818938	0.0151072	-0.883407	0.875416
B9D2	0.0162059	0.0209108	-0.367731	0.365739
BABAM1	0.5985	0.248941	1.2655	-1.26521
BACH2	0.972353	2.26882	-1.22221	1.22231
BAG2	0.308683	0.552906	-0.840873	0.840702
BAG3	0.255156	0.410549	-0.68615	0.685959
BAG4	1.13441	2.26882	-0.999836	0.999936
BAG5	1.94471	0.972353	0.99986	-0.999926
BANF1	11.3441	4.92179	1.20377	-1.20468
BAZ1A	0.228789	0.364632	-0.672405	0.67219
BAZ1A-AS1	4.21353	2.26882	0.892804	-0.893055
BAZ1B	0.540196	0.37042	0.544296	-0.544198
BBOF1	0.162059	0.324118	-0.999977	0.999556
BBS4	0.0421353	0.106075	-1.33197	1.32992
BCAN-AS2	4.33507	3.83955	0.175048	-0.175115
BCAP29	1.13441	0.589305	0.944781	-0.944742
BCAS3	2.59294	1.29647	0.999813	-0.999945
BCAT2	0.0589304	0.0747964	-0.343953	0.343437
BCDIN3D	0.0281841	0.0360131	-0.353635	0.352527
BCL10-AS1	0.252092	0.277815	-0.140174	0.140124
BCL2L12	1.77617	1.46806	0.27481	-0.274837
BCL2L13	0.598371	1.43398	-1.26079	1.26077
BCL2L2	1.08811	0.787143	0.467083	-0.467076
BCL2L2-PABPN1	1.08811	0.820402	0.407381	-0.407377
BCL7C	1.102	0.972353	0.180553	-0.180555
BCLAF1	0.0222367	0.0285223	-0.359147	0.357723
BCO2	0.194471	0.134539	0.531514	-0.531193
BCS1L	1.44052	1.70162	-0.240275	0.240298
BECN1	0.0793758	0.147326	-0.892233	0.891405
BEND3	0.162059	0.0648235	1.32192	-1.3206
BEND6	2.15097	3.24118	-0.591376	0.591511
BFAR	0.0883957	0.230078	-1.38005	1.37907
BHLHE40-AS1	0.689049	0.327451	1.07328	-1.0731
BHLHE41	1.71134	4.53765	-1.40641	1.40677
BHMT2	1.1164	2.83603	-1.34476	1.34493
BICRA	0.375294	0.684248	-0.866454	0.866325
BICRAL	5.21082	3.3409	0.641002	-0.641256
BIN1	0.216078	0.162059	0.415031	-0.414816
BIRC2	1.13772	0.4408	1.36785	-1.36775
BIRC5	0.554347	0.423337	0.388964	-0.388902
BIVM	0.626627	0.919523	-0.553236	0.553205
BIVM-ERCC5	0.638325	0.288383	1.14625	-1.14603
BLOC1S1-RDH5	0.324118	0.648235	-0.999952	0.999777
BLOC1S6	0.0902074	0.0399745	1.17416	-1.17216
BLTP2	0.129647	0.324118	-1.3219	1.32126
BLTP3A	0.388941	0.308435	0.334576	-0.334491
BLTP3B	0.540196	1.29647	-1.26293	1.26288
BLVRA	0.756275	0.648235	0.222377	-0.222361
BLZF1	0.175726	0.223281	-0.345523	0.345355
BMAL2	2.26882	1.20387	0.914117	-0.914215
BMF	2.26882	3.88941	-0.777374	0.777581
BMI1	0.312941	0.30251	0.0489082	-0.0488938
BMP2	7.77882	5.51	0.497172	-0.497491
BMPR2	2.72259	4.37559	-0.68426	0.684479
BMS1	0.170963	0.450946	-1.39923	1.39875
BNIP2	2.72259	5.02383	-0.883477	0.883784
BOLA1	0.102823	0.0669664	0.618653	-0.617908
BORCS5	0.037042	0.0301973	0.294742	-0.293863
BORCS7-ASMT	0.162059	0.117861	0.459424	-0.459097
BRCA1	0.972353	1.29647	-0.41499	0.415
BRD2	1.98792	3.24118	-0.705074	0.705227
BRIX1	0.0332428	0.0682353	-1.03747	1.03526
BRMS1L	0.228789	0.453764	-0.987894	0.987614
BRPF3	0.625084	1.51255	-1.27473	1.27472
BSG	19.6577	21.1413	-0.104755	0.104968
BTAF1	0.0703511	0.197013	-1.48563	1.48433
BTBD1	0.092605	0.162059	-0.807345	0.806688
BTBD16	0.729265	0.518588	0.491823	-0.491773
BTBD19	1.2593	1.68437	-0.419528	0.41956
BTBD3	0.792287	0.810294	-0.0324194	0.0324179
BTD	0.555563	0.449676	0.305049	-0.305003
BTF3	0.0750501	0.201073	-1.42177	1.42059
BTN2A1	0.0689612	0.129647	-0.910725	0.909755
BTNL12P	0.222831	0.167647	0.410512	-0.410307
BUD31	0.597284	0.36474	0.711517	-0.711397
BZW1	0.290101	0.564741	-0.960994	0.960792
BZW1-AS1	0.00665539	0.012891	-0.953772	0.943406
C10orf95-AS1	0.92605	1.51255	-0.707735	0.707759
C11orf58	0.0460322	0.109583	-1.25129	1.24949
C14orf119	0.0312934	0.020233	0.629145	-0.626637
C15orf40	0.0589304	0.058175	0.0186145	-0.0185829
C15orf61	0.280902	0.680647	-1.27678	1.27654
C17orf58	1.3636	0.582247	1.22761	-1.22758
C17orf75	0.0294652	0.0463025	-0.652073	0.6503
C17orf80	0.0675244	0.0540196	0.321925	-0.321394
C1GALT1	1.62059	1.67952	-0.051521	0.0515264
C1orf115	0.810295	0.972353	-0.26301	0.263004
C1orf198	0.598371	0.327425	0.869837	-0.869677
C1orf220	1.29647	0.486176	1.41492	-1.41485
C1orf43	1.102	0.486177	1.18048	-1.18041
C1orf50	1.29647	1.29647	-9.40358e-08	9.40407e-08
C1orf54	0.842706	0.601933	0.485393	-0.485359
C1RL	1.25017	0.891324	0.488048	-0.488053
C1RL-AS1	0.913422	0.648235	0.494726	-0.4947
C22orf39	0.0172863	0.0219741	-0.346176	0.344405
C2CD5	0.0972353	0.138908	-0.514566	0.514128
C2orf42	0.0347269	0.0589304	-0.762958	0.761259
C2orf49	2.10676	1.56657	0.427343	-0.427398
C2orf69	0.152526	0.196435	-0.364992	0.364787
C2orf76	0.00995097	0.0111217	-0.160465	0.158954
C2orf88	0.212149	0.308683	-0.541032	0.540834
C4orf19	1.47001	3.14857	-1.09863	1.09882
C4orf36	0.162059	0.297108	-0.874448	0.874063
C5orf22	0.176791	0.324118	-0.874449	0.874099
C5orf34	0.0720261	0.194471	-1.43294	1.4317
C5orf34-AS1	0.0516912	0.0202573	1.35147	-1.34716
C6orf120	2.55693	1.54579	0.72592	-0.726029
C6orf132	0.216078	0.129647	0.736953	-0.736521
C6orf226	5.17508	3.28255	0.656491	-0.656747
C6orf52	0.0589305	0.162059	-1.45942	1.45788
C8G	0.444161	0.831902	-0.905274	0.905179
C8orf33	1.13441	0.710967	0.674028	-0.674013
C8orf44-SGK3	0.176791	0.129647	0.447453	-0.447163
C9orf163	0.226882	0.108039	1.07037	-1.06969
C9orf40	0.0704604	0.0511764	0.46133	-0.460563
CA3-AS1	0.409412	0.353583	0.211496	-0.211449
CACFD1	0.810294	0.785362	0.0450841	-0.045082
CACNA1H	1.89069	5.18589	-1.45521	1.45563
CACNB2	0.777882	0.405147	0.941053	-0.940936
CAD	0.401194	0.360131	0.155775	-0.15574
CAGE1	0.0136951	0.0123083	0.154033	-0.152856
CAHM	0.0161052	0.0294652	-0.871484	0.867444
CALCB	0.972353	1.29647	-0.414992	0.415001
CALD1	0.531978	0.472821	0.170064	-0.170039
CALM3	0.483118	0.461622	0.0656606	-0.0656498
CALR	1.29912	1.99556	-0.619159	0.619221
CAMK2D	0.108039	0.0589305	0.874461	-0.873357
CAMKK2	4.86176	2.26883	1.09916	-1.0995
CAMKMT	0.540196	0.435956	0.309285	-0.309236
CAMSAP2	0.0804201	0.204443	-1.34606	1.34499
CAMSAP3	0.293382	0.344243	-0.230636	0.230571
CAMTA2	2.99809	1.13394	1.40243	-1.40262
CAND1	0.788686	0.91647	-0.216619	0.216611
CANX	0.182196	0.462505	-1.34394	1.3435
CAPN10	0.756274	0.972353	-0.362539	0.362528
CAPN15	3.0251	8.10295	-1.42073	1.42144
CAPN3	0.972353	1.11126	-0.192625	0.192627
CAPN7	0.335693	0.842706	-1.32781	1.32763
CAPNS1	0.795219	1.35049	-0.76398	0.763985
CAPZA1	0.0280252	0.0583411	-1.05778	1.05512
CAPZA2	0.0231512	0.0627324	-1.43812	1.4342
CARD8-AS1	0.0540196	0.0540196	-2.29072e-07	2.2865e-07
CARF	0.216078	0.324118	-0.584947	0.58474
CARHSP1	0.486176	0.648235	-0.415014	0.414963
CARS2	0.162059	0.162059	-8.75302e-07	8.74777e-07
CASC11	0.568281	0.544258	0.0623099	-0.0623022
CASC3	0.417941	0.300109	0.477794	-0.477676
CASP4	0.0648235	0.162059	-1.32191	1.32059
CASP8AP2	0.19207	0.174525	0.138195	-0.138122
CAT	0.30251	0.601933	-0.992577	0.992383
CATSPERE	0.138908	0.0648235	1.09953	-1.09835
CBFA2T2	0.353583	0.713058	-1.01192	1.01177
CBFB	6.15824	6.07613	0.0193524	-0.0193639
CBLN3	0.680647	0.787143	-0.209704	0.209691
CBX3	4.35533	11.3632	-1.3825	1.38349
CBX5	0.144052	0.0648235	1.15199	-1.15078
CBY1	0.242995	0.601933	-1.30863	1.30832
CCAR1	0.139446	0.198072	-0.506311	0.506014
CCAR2	0.191524	0.246329	-0.363057	0.362897
CCDC102A	0.648235	0.37042	0.807315	-0.807188
CCDC103	0.756275	0.324118	1.22233	-1.22214
CCDC125	0.182316	0.0648235	1.49184	-1.49042
CCDC138	0.0564474	0.126046	-1.15896	1.15756
CCDC157	0.288105	0.108039	1.41501	-1.4142
CCDC167	0.409412	0.231513	0.822436	-0.822191
CCDC174	0.119783	0.0988834	0.276616	-0.276365
CCDC18	0.771086	1.59112	-1.04496	1.04499
CCDC43	0.0158106	0.0206883	-0.387926	0.385787
CCDC47	0.922489	1.59112	-0.786345	0.786376
CCDC59	0.180065	0.117861	0.611425	-0.611012
CCDC77	0.980882	0.958261	0.0336573	-0.0336571
CCDC88A	0.324118	0.648235	-0.999953	0.999777
CCDC91	0.847692	0.918333	-0.115467	0.115464
CCDC93	0.117861	0.129647	-0.137502	0.137392
CCL20	0.196328	0.527256	-1.42519	1.42478
CCN1	1.49166	1.43951	0.0513333	-0.0513373
CCNA2	0.648235	0.648235	0	0
CCNB1	0.314804	0.303429	0.0530926	-0.0530771
CCNB2	0.0591995	0.16675	-1.49402	1.49246
CCNC	0.215239	0.0810294	1.4094	-1.40831
CCNF	1.11126	0.486176	1.19255	-1.19248
CCNG1	0.62982	0.52277	0.268746	-0.268715
CCNI	0.0720262	0.0720261	7.96969e-07	-7.95869e-07
CCNJL	0.0864314	0.0405147	1.0931	-1.09122
CCNL1	0.0491348	0.0184158	1.4158	-1.41093
CCNT2	0.268377	0.383589	-0.51528	0.515135
CCNYL1	0.110495	0.169538	-0.617629	0.617183
CCR6	0.158458	0.432157	-1.44742	1.44688
CCT2	0.183897	0.347642	-0.918685	0.918339
CCT5	0.0160174	0.0391181	-1.28819	1.2829
CCT6A	0.222112	0.481974	-1.11763	1.11732
CD276	0.324118	0.388941	-0.263025	0.26296
CD2AP	0.0852941	0.175564	-1.04146	1.04061
CD63	0.756275	0.972353	-0.362539	0.362528
CDC123	0.162059	0.0620225	1.38564	-1.38422
CDC14A	1.86015	3.88941	-1.06384	1.06409
CDC16	1.09552	0.596376	0.877246	-0.877207
CDC20	2.17435	2.33673	-0.10388	0.103899
CDC25B	0.465179	0.502275	-0.110687	0.11067
CDC25C	0.108039	0.0810294	0.415034	-0.414594
CDC37L1	0.173072	0.358598	-1.05097	1.05056
CDC40	2.08651	4.32157	-1.05014	1.05043
CDC42	0.37693	0.435883	-0.209634	0.20959
CDC5L	0.020604	0.0365427	-0.826653	0.823613
CDH6	1.21544	1.62059	-0.414979	0.415008
CDIPT	0.0441978	0.0540196	-0.289505	0.288914
CDK10	0.281027	0.207722	0.436046	-0.435875
CDK12	0.387016	0.726263	-0.908051	0.907926
CDK13	0.390141	0.602401	-0.626696	0.626596
CDK14	2.64586	1.05338	1.32848	-1.32862
CDK19	0.0191306	0.0360131	-0.912633	0.909114
CDK2AP1	0.0432157	0.0565919	-0.38904	0.388254
CDK8	0.116259	0.0810294	0.520826	-0.520292
CDK9	0.363012	0.761676	-1.06911	1.06895
CDKAL1	0.124981	0.108307	0.206586	-0.206411
CDKN2A	1.17861	0.648235	0.862421	-0.862397
CDKN2AIP	0.0565321	0.109738	-0.956913	0.955685
CDKN2B-AS1	0.972353	0.436854	1.15425	-1.15415
CDS2	1.102	1.29647	-0.234437	0.234445
CDYL	1.01866	0.438512	1.21589	-1.21579
CEBPG	1.82311	3.6116	-0.985977	0.986196
CELA3B	0.324118	0.324118	0	0
CELF6	0.0082055	0.0154342	-0.911463	0.903306
CELSR1	0.486176	0.648235	-0.415014	0.414963
CENPA	1.32348	0.513186	1.36667	-1.36661
CENPC	0.648235	0.486176	0.415014	-0.414963
CENPH	0.583412	0.972353	-0.73691	0.736867
CENPL	0.0109253	0.0162059	-0.568843	0.564573
CENPN	0.966921	0.401906	1.26646	-1.26633
CENPP	0.378137	0.216078	0.807331	-0.807069
CENPS	2.79892	6.15824	-1.13716	1.13762
CENPT	0.405147	0.151255	1.42143	-1.42087
CENPV	4.63489	7.88687	-0.76645	0.766906
CEP192	0.99396	2.00953	-1.01545	1.01552
CEP20	0.324118	0.324118	0	0
CEP350	0.0693299	0.0315479	1.13593	-1.13345
CEP43	0.162059	0.432157	-1.415	1.41448
CEP57	0.701698	0.418652	0.745059	-0.74496
CEP63	0.37042	0.504183	-0.444765	0.444681
CEPT1	1.78265	1.3829	0.366265	-0.366299
CERS6	0.247508	0.298188	-0.268742	0.26865
CFAP206	3.24118	1.94471	0.736779	-0.736936
CFAP418-AS1	2.16078	1.08039	0.999844	-0.999933
CFDP1	3.45235	2.86202	0.270457	-0.270533
CFL1	1.29647	1.94471	-0.58487	0.584926
CFL1P1	0.432157	0.277815	0.637407	-0.637244
CFL2	10.3718	4.86177	1.09231	-1.09309
CFLAR-AS1	1.62059	1.86368	-0.2016	0.201623
CGN	0.243088	0.216078	0.16992	-0.16985
CGNL1	0.648235	0.324118	0.999953	-0.999777
CHAC2	0.0180065	0.018521	-0.040642	0.0404207
CHAF1A	1.79511	1.25419	0.517237	-0.51728
CHCHD1	1.01197	0.746453	0.439002	-0.43899
CHCHD2	0.0207435	0.0332428	-0.680381	0.677778
CHCHD5	0.412513	0.411002	0.0052948	-0.00529373
CHCT1	0.0265187	0.0586985	-1.14631	1.14334
CHD1L	0.546949	0.8265	-0.595567	0.595519
CHD2	0.365326	0.955797	-1.38743	1.38728
CHD8	0.324118	0.162059	0.999977	-0.999555
CHEK1	0.665961	0.873317	-0.391038	0.391017
CHFR	0.471444	0.297108	0.666074	-0.66592
CHID1	0.0720261	0.0720261	5.01752e-07	-5.0106e-07
CHKA	0.0498643	0.0945343	-0.922826	0.921467
CHKA-DT	1.70299	1.45369	0.228314	-0.228335
CHKB-DT	1.03718	0.972353	0.0931	-0.0931001
CHMP1A	0.0432157	0.0648235	-0.584959	0.583852
CHMP4A	0.204706	0.157148	0.381423	-0.381216
CHN2	0.396144	0.293967	0.430355	-0.430243
CHN2-AS1	0.459166	0.361806	0.343788	-0.343717
CHP1	0.131191	0.15193	-0.211741	0.211594
CHRAC1	1.05535	0.837719	0.333145	-0.333141
CHST12	2.59294	1.13441	1.19243	-1.19257
CIAPIN1	0.108039	0.0405147	1.41503	-1.41282
CIB1	0.294652	0.432157	-0.552522	0.552386
CIC	0.83112	0.451688	0.879675	-0.879584
CIDEB	0.720261	0.393572	0.871848	-0.871728
CIDECP1	0.0144052	0.0243088	-0.754887	0.75083
CISD3	0.615823	1.6566	-1.42749	1.42749
CKAP4	7.83284	4.53765	0.787116	-0.787578
CKS1B	0.0506595	0.108787	-1.10259	1.10108
CLASRP	0.250033	0.288105	-0.204467	0.204396
CLCN6	2.62798	2.37686	0.14486	-0.14489
CLCN7	0.0589305	0.0308683	0.932883	-0.930667
CLDN7	1.102	1.86368	-0.757918	0.757975
CLEC16A	0.0259294	0.0249321	0.0565843	-0.0563627
CLHC1	0.0405147	0.0648235	-0.678067	0.676738
CLK1	0.408148	0.162059	1.33254	-1.33204
CLUH	0.972353	0.972353	3.1225e-16	-1.59595e-16
CLYBL	0.648235	1.55576	-1.2629	1.2629
CMAHP	1.51255	3.5653	-1.23674	1.23698
CMAS	0.259294	0.453764	-0.807327	0.807116
CMIP	3.18716	4.47282	-0.48873	0.488903
CMPK1	0.231512	0.375294	-0.696911	0.696693
CMTM3	8.42706	3.88941	1.11482	-1.11546
CMTR1	0.13346	0.174525	-0.387017	0.386769
CNBD2	0.112737	0.162059	-0.523554	0.523172
CNIH3	0.528823	0.358235	0.561853	-0.561748
CNIH4	0.363805	0.445662	-0.292772	0.292711
CNKSR3	0.0734666	0.202573	-1.46327	1.46203
CNNM3	0.627546	0.266497	1.23555	-1.23529
CNOT2	0.474022	0.779191	-0.71698	0.716905
CNOT6	0.324118	0.412513	-0.34791	0.347827
CNPPD1	0.379598	0.432157	-0.187076	0.187038
CNST	0.0992792	0.0894117	0.151025	-0.150866
CNTLN	0.396144	0.972353	-1.29537	1.29524
COASY	0.783479	0.911199	-0.217853	0.217845
COBLL1	0.842706	0.842706	7.17555e-07	-7.17531e-07
COG2	0.186991	0.0810294	1.20644	-1.20544
COG8	0.0115756	0.0140921	-0.283794	0.281586
COL18A1-AS1	0.942888	1.45853	-0.629283	0.629303
COL26A1	1.62059	2.26882	-0.485333	0.485401
COLCA1	0.486176	0.648235	-0.415015	0.414964
COMMD1	0.324118	0.486176	-0.584939	0.584814
COMMD3	0.150959	0.38489	-1.35026	1.34971
COMMD3-BMI1	0.152061	0.38489	-1.33976	1.33922
COMMD5	0.162059	0.0953287	0.765525	-0.764912
COMT	1.01866	1.01866	5.52699e-08	-5.52701e-08
COPS7B	0.092605	0.216078	-1.22238	1.2215
COPS8	0.0291003	0.0423846	-0.542504	0.540956
COQ10B	0.307481	0.360263	-0.228546	0.228485
COQ4	0.194432	0.37042	-0.929871	0.929544
COQ7	0.108254	0.106324	0.0259502	-0.0259263
COQ8B	1.62059	0.810294	0.999884	-0.999912
COQ9	0.364632	0.324118	0.169919	-0.169876
COX10	0.0199457	0.0349986	-0.811219	0.808122
COX15	0.0432157	0.0810294	-0.906884	0.905334
COX18	0.19447	0.378137	-0.959332	0.958998
COX7C	0.251732	0.47487	-0.915611	0.915374
COX8A	0.545534	0.509132	0.0996236	-0.0996099
CP	0.648235	0.972353	-0.584916	0.584888
CPD	0.614841	0.648235	-0.0762982	0.0762909
CPEB2	0.324118	0.216078	0.584947	-0.58474
CPEB4	0.400882	0.804506	-1.00487	1.00475
CPNE1	0.0212924	0.0529172	-1.31339	1.30936
CPQ	1.01866	1.45853	-0.517785	0.517806
CPSF2	0.172863	0.181124	-0.0673529	0.0673161
CPSF3	0.0557077	0.0383823	0.537431	-0.536268
CPSF7	0.477173	0.285364	0.741678	-0.741503
CPVL	1.94471	0.929137	1.06544	-1.06551
CRACD	1.45853	0.526691	1.46935	-1.46931
CRADD	0.0872625	0.0589305	0.566343	-0.565554
CRAMP1	0.331014	0.324118	0.030373	-0.0303648
CRAT	0.0883957	0.108039	-0.289503	0.28921
CRB3	0.469412	0.68875	-0.553093	0.553027
CREB5	1.69159	0.900327	0.909741	-0.909781
CREBL2	0.932393	0.373982	1.31789	-1.31774
CRELD2	0.260875	0.34905	-0.420062	0.419935
CREM	1.3962	1.94471	-0.477968	0.478018
CRIM1	0.601933	0.453764	0.407637	-0.40758
CRIP1	0.810294	0.648235	0.321905	-0.321884
CRKL	0.837628	0.38166	1.13396	-1.13382
CRLF1	0.972353	0.729265	0.415002	-0.414988
CRLS1	0.0397288	0.0811825	-1.03098	1.02913
CROCC	0.808012	1.6389	-1.02016	1.02019
CRPPA	0.372735	0.135049	1.46463	-1.46399
CRTC2	0.0720262	0.108039	-0.584957	0.584295
CRTC3	0.360131	0.324118	0.151998	-0.151959
CRYM	1.81125	0.777882	1.21921	-1.21925
CSK	0.438427	0.274615	0.674903	-0.67473
CSNK1E	0.518588	0.324118	0.678044	-0.677905
CTCF	1.29647	0.498642	1.3784	-1.37834
CTCF-DT	0.108039	0.216078	-0.999984	0.999333
CTDNEP1	0.0079053	0.0180065	-1.18763	1.17748
CTDSP1	1.54374	2.08361	-0.432584	0.432638
CTIF	1.29647	0.918333	0.497445	-0.497453
CTNNA1	0.488376	0.365817	0.416853	-0.416772
CTNNAL1	0.486176	0.648235	-0.415014	0.414963
CTNND1	0.244229	0.315721	-0.370403	0.37028
CTNS	0.875117	1.18843	-0.441466	0.441467
CTRL	0.309385	0.162059	0.932866	-0.932463
CTSA	75.9517	43.1077	0.812426	-0.817135
CTSB	0.324118	0.324118	0	0
CTTN-DT	0.178823	0.199457	-0.157539	0.157459
CUL5	0.416723	0.442961	-0.0880881	0.0880714
CUL7	0.243088	0.648235	-1.41498	1.41467
CUTALP	0.828301	1.02222	-0.303447	0.303442
CWC22	0.0525596	0.0589305	-0.165059	0.164763
CWC27	0.039287	0.0700794	-0.834936	0.83333
CXCL16	0.972353	2.26882	-1.22221	1.22231
CXXC5	0.226882	0.210676	0.106913	-0.106867
CYB561A3	0.0216078	0.0113725	0.925999	-0.920031
CYB5D1	0.423444	0.63666	-0.588321	0.588238
CYB5D2	0.454606	0.849909	-0.902633	0.902543
CYC1	3.20744	2.79196	0.200085	-0.200138
CYP19A1	1.62059	1.62059	-4.25296e-07	4.25339e-07
CYP1B1-AS1	1.76791	3.81462	-1.10919	1.10945
CYP20A1	0.111313	0.106075	0.0695396	-0.0694764
CYP2R1	0.518588	0.864314	-0.736917	0.736856
CYP51A1-AS1	0.134118	0.305596	-1.1881	1.18753
CYREN	3.14708	3.83539	-0.285261	0.285352
CYTH2	0.271354	0.259294	0.0655863	-0.0655633
CZIB	0.108039	0.108039	0	0
D2HGDH	0.432157	0.918333	-1.08739	1.08729
DANCR	0.712554	1.03832	-0.543138	0.543121
DARS1	1.44052	1.29647	0.151982	-0.151992
DARS1-AS1	0.148168	0.131673	0.170275	-0.170156
DARS2	0.286924	0.342998	-0.257526	0.257452
DAZAP2	1.09492	1.62283	-0.567606	0.567639
DBI	0.469971	0.287719	0.707882	-0.707714
DCAF10	1.32131	0.860588	0.618505	-0.618513
DCAF13	0.0540195	0.0538158	0.00545268	-0.00544261
DCAF5	0.144052	0.324118	-1.1699	1.16937
DCAF6	2.49019	0.989814	1.33081	-1.33094
DCAF7	0.184067	0.375682	-1.02925	1.02888
DCAF8	0.358116	0.679104	-0.923158	0.923014
DCAF8-DT	0.608275	0.703086	-0.208963	0.208944
DCAKD	0.0926051	0.129647	-0.48542	0.48498
DCK	0.100955	0.0486176	1.05415	-1.05262
DCTN1	0.324118	0.162059	0.999977	-0.999555
DCXR	0.324118	0.648235	-0.999953	0.999777
DCXR-DT	0.648235	0.324118	0.999953	-0.999777
DDA1	0.463025	0.439874	0.0739982	-0.0739852
DDAH1	0.0817594	0.0540196	0.597898	-0.596998
DDAH2	0.648235	0.324118	0.999953	-0.999777
DDB1	2.83603	5.67206	-0.999593	0.999977
DDC-AS1	0.324118	0.324118	0	0
DDHD2	0.972353	1.62059	-0.736873	0.736907
DDI2	1.18072	2.10677	-0.835234	0.835314
DDIT4	0.745551	1.30811	-0.811018	0.811016
DDX20	0.036013	0.0634143	-0.816285	0.814562
DDX21	0.573054	0.550486	0.0579615	-0.0579545
DDX31	0.0617367	0.108039	-0.807348	0.806355
DDX5	2.51191	3.72736	-0.569192	0.569348
DDX56	38.2459	13.775	1.46973	-1.47325
DDX6	1.62059	0.615823	1.39578	-1.39578
DEAF1	1.13441	0.810294	0.48538	-0.485376
DEDD2	1.29647	1.13441	0.192621	-0.192629
DEGS1	0.324118	0.283603	0.192639	-0.192582
DENND10	0.102637	0.153529	-0.580955	0.580496
DENND3	0.777882	1.29647	-0.736891	0.736891
DENND4A	0.0765631	0.101287	-0.403719	0.403264
DENND4C	2.10677	1.24245	0.761716	-0.761793
DENND5B	0.398914	0.445662	-0.159864	0.159833
DENND5B-AS1	1.94471	3.40324	-0.807146	0.807324
DENND6B	0.0341176	0.0270098	0.337035	-0.335927
DENR	0.421353	0.815522	-0.952638	0.952529
DERA	0.810294	1.7756	-1.13165	1.13169
DET1	0.648235	0.648235	0	0
DGCR8	0.132435	0.272176	-1.03923	1.03869
DHCR24	0.648235	0.324118	0.999953	-0.999777
DHFR2	0.00944031	0.0223529	-1.24356	1.2348
DHODH	0.136471	0.259294	-0.925981	0.925498
DHPS	0.0509327	0.0589304	-0.210418	0.210036
DHRS1	0.0611543	0.0829138	-0.439155	0.43854
DHRS3	0.352716	0.291706	0.273983	-0.273906
DHRS7B	0.810294	0.810294	-5.69768e-07	5.69744e-07
DHX15	0.0493024	0.030386	0.698246	-0.696432
DHX30	0.108039	0.0720261	0.584958	-0.584296
DHX9	0.195187	0.257901	-0.401948	0.401778
DICER1	0.0720262	0.135049	-0.906881	0.905956
DICER1-AS1	0.378137	0.486177	-0.362555	0.362486
DIDO1	0.563683	0.400727	0.49224	-0.492159
DIP2B	0.19447	0.254664	-0.389035	0.388869
DIPK2A	0.231513	0.259294	-0.163495	0.163433
DIS3L2	2.46329	0.972353	1.34082	-1.34095
DISP1	0.060301	0.0900327	-0.578263	0.577479
DIXDC1	0.388941	0.324118	0.263025	-0.26296
DLAT	0.0900326	0.141801	-0.655345	0.654768
DLC1	1.29647	0.777882	0.736891	-0.736892
DLEU2	0.74084	1.21004	-0.707752	0.707744
DLG1-AS1	0.648235	0.972353	-0.584916	0.584889
DLGAP1-AS1	2.07691	3.76787	-0.859065	0.859278
DLL4	0.124889	0.335557	-1.42588	1.42518
DMAC2	0.477647	0.720261	-0.592541	0.592475
DMPK	0.972353	0.997286	-0.0365229	0.0365228
DMTF1	0.408388	0.310423	0.395691	-0.395594
DNAAF2	9.56148	6.35271	0.5894	-0.589855
DNAH14	0.159776	0.33409	-1.06416	1.06372
DNAH5	0.0209108	0.0360131	-0.78427	0.78139
DNAH6	0.216078	0.324117	-0.584947	0.58474
DNAJB2	0.74084	0.324117	1.19259	-1.1924
DNAJB4	0.062065	0.107607	-0.793913	0.792937
DNAJC14	0.589305	0.74547	-0.339114	0.339085
DNAJC19	3.83048	3.83539	-0.00184701	0.00184767
DNAJC22	14.5853	5.88814	1.30738	-1.30862
DNAJC3	0.0618162	0.0516997	0.257827	-0.257372
DNAJC9-AS1	0.00914724	0.0216801	-1.24496	1.23592
DNASE1	0.0900327	0.0810294	0.152003	-0.151827
DNLZ	0.845525	0.37042	1.19062	-1.19047
DNM2	0.0386365	0.0540196	-0.483514	0.482455
DNMT3A	0.533841	1.09701	-1.03902	1.03896
DNPH1	1.62059	0.972353	0.736872	-0.736906
DOCK8	0.486176	0.540196	-0.151995	0.151973
DOHH	0.648235	0.416723	0.637396	-0.637306
DOLK	0.0422761	0.0720261	-0.768671	0.767269
DOP1A	4.61868	8.85922	-0.939087	0.939684
DOT1L	0.248152	0.52219	-1.07331	1.07304
DPAGT1	0.463025	1.08039	-1.2223	1.22221
DPF2	0.0184457	0.0486176	-1.39819	1.39336
DPH1	1.01287	1.75024	-0.788997	0.789043
DPH3	0.162059	0.108039	0.584956	-0.584519
DPH5	0.0147326	0.0154342	-0.0671126	0.0666705
DPH5-DT	0.0736631	0.0452257	0.703796	-0.702571
DPH6	0.0360131	0.0810294	-1.16992	1.1677
DPM3	4.53765	2.80902	0.691628	-0.691858
DPP3	0.57801	0.702862	-0.28213	0.282103
DPP3-DT	0.111126	0.0761911	0.544497	-0.543907
DPY19L4	0.378137	0.810294	-1.09947	1.09933
DPYD	1.29647	0.972353	0.414991	-0.415
DPYSL2	0.594216	0.972353	-0.710439	0.710399
DR1	1.22597	0.563273	1.12192	-1.12188
DRAM1	0.191524	0.103128	0.893072	-0.89244
DRG1	0.300109	0.547399	-0.86707	0.866888
DSCAS	0.972353	0.972353	3.1225e-16	-1.59595e-16
DSE	0.0569061	0.0336746	0.756921	-0.755179
DSP	0.303281	0.540957	-0.834823	0.834648
DSP-AS1	3.13314	1.49742	1.06489	-1.06508
DST-AS1	0.486176	0.405147	0.263023	-0.262975
DTD1	0.210964	0.490129	-1.21612	1.21577
DTNA	0.982482	0.89609	0.132775	-0.132773
DTYMK	0.982666	0.621818	0.660157	-0.660123
DUS4L-BCAP29	0.432157	0.972353	-1.16985	1.16974
DUSP12	0.203372	0.245158	-0.269586	0.269472
DUSP22	0.147326	0.280902	-0.931032	0.930586
DUSP28	3.88941	2.59294	0.584776	-0.584944
DUSP3	0.0240087	0.0294652	-0.295454	0.294346
DYNC1I2	0.132771	0.13805	-0.0562511	0.0562103
DYNC2I2	3.24118	3.88941	-0.262941	0.263027
DYNC2LI1	0.123337	0.08816	0.484401	-0.48394
DYNLL2	0.162059	0.40867	-1.33438	1.33388
DYNLRB1	0.212621	0.216078	-0.0232695	0.0232591
DYRK1A	0.603055	1.27196	-1.0766	1.07657
DYRK1B	0.37042	0.199457	0.893061	-0.892752
E2F1	0.0997286	0.216078	-1.11546	1.1147
E2F3	0.124661	0.0683832	0.866284	-0.86534
E2F4	2.16079	1.3829	0.643745	-0.64382
E2F5	2.33365	1.13441	1.04047	-1.04058
E2F7	0.129647	0.108039	0.263032	-0.262813
EAF1	0.0896496	0.0831071	0.109325	-0.109199
ECHDC1	0.0540195	0.0790531	-0.549337	0.548496
ECT2	0.0244016	0.0408271	-0.742549	0.74018
EED	0.679104	0.532479	0.350886	-0.350849
EEF1A1-AS1	0.0629355	0.158019	-1.32814	1.32677
EEF1AKMT4	0.0190657	0.0249321	-0.387022	0.385251
EEF1AKMT4-ECE2	0.0190657	0.0249321	-0.387022	0.385251
EEF1B2	2.13869	3.5828	-0.744151	0.744332
EEF1G	2.59294	1.51255	0.777452	-0.777568
EEPD1	0.412823	0.505345	-0.29173	0.291679
EFCAB5	0.432157	1.05338	-1.28531	1.28521
EGFR-AS1	0.343564	0.210834	0.704456	-0.704211
EGLN1	1.13441	0.972353	0.222368	-0.222371
EGLN2	20.0172	10.7626	0.893873	-0.8952
EHBP1	1.60307	3.60131	-1.1674	1.16763
EIF1	0.944301	1.24301	-0.396471	0.396478
EIF2A	0.047521	0.116128	-1.28907	1.28728
EIF2B4	0.246946	0.324118	-0.392308	0.39218
EIF3B	9.13854	11.6219	-0.346457	0.346812
EIF3H	2.55243	1.14688	1.15396	-1.15409
EIF3J	0.50582	0.806466	-0.672946	0.672883
EIF3J-DT	0.0790638	0.10702	-0.436785	0.436313
EIF3L	1.01268	1.51891	-0.584788	0.584813
EIF4A1	0.969862	1.60387	-0.72561	0.725643
EIF4A2	0.62195	1.18992	-0.935917	0.935889
EIF4E	2.26882	3.13314	-0.465539	0.465646
EIF4E2	0.141568	0.0731878	0.951815	-0.950873
EIF4EBP1	0.274253	0.371999	-0.439775	0.43965
EIF4EBP2	0.58889	1.01557	-0.786157	0.786116
EIF4G1	0.303207	0.221051	0.455912	-0.455747
EIF4H	0.0612222	0.0515264	0.248742	-0.2483
EIF5A	0.214618	0.340513	-0.665917	0.665686
EIF6	0.0720261	0.092605	-0.362567	0.362126
ELDR	0.810295	1.29647	-0.678002	0.678005
ELK4	0.0563683	0.0395266	0.512058	-0.510973
ELL3	2.73185	6.96853	-1.35036	1.35094
ELMOD2	0.185765	0.419667	-1.17573	1.17533
ELOA-AS1	0.324117	0.270098	0.263026	-0.262945
ELP1	0.324118	0.324118	0	0
ELP2	0.0953287	0.111415	-0.224964	0.224748
ELP5	46.5287	37.5977	0.306195	-0.307478
EMC2	0.297838	0.181584	0.713873	-0.71358
EMC3	2.91706	2.755	0.0824386	-0.082459
EMC9	0.486176	0.486176	2.22045e-16	-2.22045e-16
EME2	0.753213	0.299409	1.33087	-1.33065
EMG1	0.0389916	0.0895053	-1.1988	1.19673
EMILIN2	0.388941	0.169105	1.2016	-1.20115
EML4	0.118843	0.246017	-1.04968	1.04907
EML4-AS1	3.86905	2.72941	0.503224	-0.503373
ENDOG	0.116682	0.117861	-0.0144991	0.0144869
ENO1-AS1	2.4849	2.05275	0.275572	-0.275622
ENO3	1.94471	1.29647	0.58487	-0.584926
ENPP1	0.453765	0.567206	-0.321912	0.321865
ENPP2	0.19447	0.129647	0.584953	-0.584592
ENTPD1-AS1	0.0489234	0.0339801	0.525834	-0.524542
ENTPD6	0.416723	0.324118	0.362557	-0.362471
ENTR1	0.0953288	0.0540196	0.819423	-0.818273
ENY2	0.236373	0.193527	0.288528	-0.288399
EP400	0.405147	1.05338	-1.37842	1.37829
EPAS1	1.41433	1.46933	-0.0550319	0.055036
EPB41	1.49094	0.540196	1.46453	-1.4645
EPB41L4A-AS1	4.88837	12.7564	-1.38266	1.38377
EPC1	2.55243	2.52812	0.0138031	-0.013806
EPC2	0.732544	0.484309	0.596952	-0.596887
EPCAM	0.0600217	0.0540196	0.152001	-0.151735
EPDR1	0.589305	0.378137	0.640073	-0.639967
EPHA1	1.94471	1.29647	0.584869	-0.584925
EPHA2	0.810293	0.787143	0.0418162	-0.0418143
EPHA2-AS1	0.216079	0.38489	-0.832865	0.832596
EPHX1	0.833446	0.526691	0.662086	-0.66203
EPM2A	0.205205	0.405147	-0.981353	0.981035
EPM2A-DT	0.119412	0.0682352	0.807349	-0.806451
EPN1	0.16697	0.397781	-1.25235	1.25189
EPRS1	1.62059	0.648236	1.32179	-1.32179
ERAL1	0.0756823	0.125834	-0.733486	0.732734
ERCC1	0.270098	0.162059	0.73695	-0.736609
ERCC5	0.152725	0.191845	-0.328997	0.32881
ERCC6L2	0.311887	0.720261	-1.20744	1.20724
ERGIC1	0.324118	0.405147	-0.321917	0.32184
ERICH1	0.324118	0.277815	0.222386	-0.222318
ERICH2-DT	0.216078	0.259294	-0.263029	0.262924
ERLEC1	0.172863	0.231512	-0.421455	0.421252
ERLIN1	0.0294652	0.0270098	0.125532	-0.125089
ERLIN2	0.553701	0.453765	0.287149	-0.287106
ERN1	0.810295	1.13441	-0.48538	0.485376
ERP29	0.430156	0.470366	-0.128918	0.128896
ERP44	0.648235	1.62059	-1.32179	1.32179
ERVMER34-1	0.129647	0.0729265	0.830067	-0.82921
ETFB	1.47529	1.03718	0.508277	-0.508299
ETFRF1	0.0249321	0.0365203	-0.550692	0.548864
ETNK1	0.356529	0.827059	-1.2139	1.21374
ETV4	4.32157	4.99141	-0.207795	0.207887
EVA1A	0.138908	0.324118	-1.22237	1.2218
EXOC3	0.486177	0.756275	-0.637391	0.637324
EXOC5	0.00841863	0.0140921	-0.743224	0.73639
EXOC6	0.324118	0.216078	0.584947	-0.584741
EXOC8	0.0352301	0.0571972	-0.69913	0.697565
EXOSC10	5.34795	6.80647	-0.347712	0.347916
EXOSC3	0.0872625	0.117861	-0.433647	0.433222
EXOSC4	1.06645	2.59294	-1.28155	1.28169
EXOSC6	0.648235	1.29647	-0.999906	0.999889
EXOSC8	15.2335	23.3365	-0.614171	0.615334
EXTL3	0.486176	0.583412	-0.263021	0.262986
EXTL3-AS1	0.387006	1.02097	-1.39942	1.39928
EYS	0.283032	0.162059	0.804432	-0.804069
EZH1	0.324118	0.324118	0	0
EZH2	0.036013	0.0308683	0.22239	-0.221726
F3	0.0648235	0.0540196	0.263033	-0.26259
F5	0.972353	1.89069	-0.959226	0.959286
FAAP100	0.486176	0.648235	-0.415014	0.414964
FADD	0.293732	0.472545	-0.685928	0.685768
FADS1	0.648235	0.694538	-0.099529	0.0995208
FAHD1	1.65412	0.990874	0.739191	-0.739228
FAM110C	1.62059	1.29647	0.321881	-0.321906
FAM114A1	0.552906	0.518588	0.0924403	-0.092428
FAM120B	0.0505118	0.12413	-1.29715	1.29547
FAM135A	0.0694537	0.0595318	0.22239	-0.222046
FAM136A	0.486176	0.648235	-0.415014	0.414963
FAM157A	1.94471	2.59294	-0.414944	0.415019
FAM157B	0.648235	0.648235	0	0
FAM157C	0.277815	0.388941	-0.485411	0.485279
FAM169A-AS1	0.648235	0.540196	0.263019	-0.26299
FAM171A2	0.648235	1.29647	-0.999906	0.999889
FAM174B	0.00706523	0.0180903	-1.35641	1.34408
FAM186A	0.972353	0.972353	3.1225e-16	-1.59595e-16
FAM193A	0.637666	0.678001	-0.0884819	0.0884742
FAM20B	0.986048	1.34245	-0.445082	0.445094
FAM217B	1.27621	0.719192	0.82734	-0.827332
FAM219B	0.486176	0.216078	1.16989	-1.16955
FAM227B	0.0324117	0.0810294	-1.32192	1.31926
FAM228B	0.648235	0.648235	0	0
FAM27E4	0.30251	0.324118	-0.0995331	0.0995044
FAM32A	0.0220274	0.0586498	-1.41282	1.40875
FAM50B	7.04956	3.07912	1.19444	-1.19499
FAM53B	0.648235	0.405147	0.678037	-0.677938
FAM83D	0.0589863	0.0553891	0.0907771	-0.0906191
FAM89A	0.324118	0.162059	0.999977	-0.999555
FAM89B	1.58111	2.76366	-0.805476	0.805608
FAM91A1	0.0710967	0.169105	-1.25005	1.24889
FAM98B	0.332761	0.367333	-0.1426	0.142564
FANCC	0.174525	0.0720261	1.27683	-1.27567
FANCL	0.0180065	0.0202573	-0.169924	0.169039
FARSA	0.108039	0.0511764	1.078	-1.07652
FARSB	0.324118	0.324118	0	0
FASTKD2	0.297453	0.335419	-0.173298	0.173248
FAT1	0.972353	0.432157	1.16985	-1.16974
FAXDC2	1.84747	1.11821	0.724261	-0.724315
FBLN1	0.0733357	0.0547104	0.422698	-0.422032
FBRS	3.28748	1.42612	1.20462	-1.20483
FBRSL1	3.37082	3.53583	-0.0689241	0.0689459
FBXL21P	0.216078	0.216078	-1.87537e-07	1.87455e-07
FBXL3	0.0810294	0.103718	-0.356141	0.355755
FBXL4	0.388941	0.162059	1.263	-1.26252
FBXO11	1.40451	0.567206	1.308	-1.30797
FBXO22	0.136129	0.324118	-1.25151	1.25093
FBXO28	0.294653	0.153529	0.940481	-0.940051
FBXO30	0.648235	0.396144	0.710458	-0.710352
FBXO33	0.0527633	0.0648235	-0.296982	0.296476
FBXO34	3.14585	5.40196	-0.779708	0.780014
FBXO36	0.972353	0.540196	0.847935	-0.847878
FBXO4	0.504183	0.601933	-0.25564	0.255608
FBXO5	0.385727	0.406356	-0.0751632	0.0751472
FBXO7	0.0857958	0.115009	-0.422769	0.422346
FBXW8	0.432157	0.26692	0.695121	-0.694939
FDPS	0.94698	0.740131	0.355524	-0.355511
FDX1	0.324117	0.37042	-0.192639	0.19259
FEM1B	3.16015	1.71319	0.883095	-0.883265
FER	0.324117	0.648235	-0.999954	0.999778
FES	0.810294	0.486176	0.736919	-0.736847
FEZ1	0.243088	0.540196	-1.15196	1.15168
FGFR2	1.60058	0.718461	1.15549	-1.1555
FGFR3	0.182773	0.264412	-0.53272	0.532488
FHIT	1.13441	1.94471	-0.777492	0.777556
FIGN	0.162059	0.216078	-0.415029	0.414814
FIRRM	0.0234302	0.0301505	-0.363812	0.362445
FIS1	0.648236	1.29647	-0.999906	0.999888
FIZ1	0.430646	0.308684	0.480357	-0.480242
FKBP2	5.88042	8.87254	-0.592996	0.593419
FKBP4	0.0603009	0.0664856	-0.140862	0.140641
FKBP5	0.648235	0.648235	0	0
FKRP	2.59294	1.29647	0.999813	-0.999945
FLAD1	0.0715584	0.187442	-1.38923	1.388
FLII	0.432157	0.972353	-1.16985	1.16974
FLNB	0.300966	0.756275	-1.32924	1.32902
FLRT2-AS1	0.583412	0.396144	0.558465	-0.558375
FLT3LG	0.648235	0.648235	0	0
FMO5	0.216078	0.162059	0.415029	-0.414814
FNDC3B	1.28475	1.13096	0.183918	-0.183925
FNIP1	0.106559	0.162059	-0.604856	0.604401
FOCAD	6.15823	3.56529	0.788122	-0.788479
FOSL2-AS1	2.05275	1.08039	0.925858	-0.925935
FOXJ3	0.324118	0.162059	0.999977	-0.999555
FOXK2	0.716145	0.900029	-0.329693	0.329679
FOXN2	0.634191	0.600161	0.0795643	-0.0795563
FOXO1	0.324117	0.453765	-0.485409	0.4853
FOXP1	0.243088	0.108039	1.16991	-1.16918
FRAS1	7.9949	4.76453	0.74628	-0.746734
FRAT1	0.972353	0.530374	0.874405	-0.874345
FRS2	0.0550388	0.055563	-0.013674	0.0136494
FRY	0.330992	0.239696	0.465578	-0.465425
FSD1L	0.453764	0.226882	0.999968	-0.999683
FTSJ3	0.370677	0.612222	-0.723859	0.723741
FUCA2	0.324118	0.157679	1.0395	-1.03906
FURIN	1.21544	0.976211	0.31618	-0.316186
FUS	0.0895641	0.12861	-0.522003	0.52152
FUT10	2.26882	2.59294	-0.192599	0.192638
FUT4	0.324118	0.243088	0.415027	-0.41489
FXR1	0.178157	0.15371	0.212939	-0.212814
FZD5	5.18588	2.10676	1.29912	-1.29952
FZD8	0.549591	0.864313	-0.65315	0.6531
G6PC3	0.053647	0.104715	-0.96489	0.963587
GAA	0.231512	0.138908	0.736951	-0.736549
GABPA	0.463755	0.341449	0.441675	-0.441581
GABPB1-AS1	6.84249	4.73212	0.53173	-0.532025
GADD45B	0.0427969	0.0907483	-1.08436	1.08259
GADD45GIP1	0.0825026	0.183197	-1.15087	1.14992
GALE	0.972353	1.94471	-0.99986	0.999927
GALNT13	0.206257	0.283603	-0.459419	0.45924
GALNT2	0.0700794	0.0747963	-0.093977	0.093848
GALR2	0.648235	1.29647	-0.999906	0.999889
GALT	1.102	0.713059	0.627974	-0.627959
GAMT	0.729265	1.42612	-0.967477	0.967481
GANAB	0.486176	1.29647	-1.41492	1.41485
GAR1	0.0907236	0.188008	-1.05123	1.05042
GARS1	0.0902127	0.253617	-1.49123	1.49022
GAS2	1.29647	0.891324	0.540509	-0.540517
GAS2L1	0.162059	0.226882	-0.485417	0.485172
GAS5	0.648235	1.29647	-0.999906	0.999889
GAS8	0.162059	0.360131	-1.15198	1.15151
GATA2	0.810294	2.11343	-1.38288	1.38296
GATA6	1.49094	2.26882	-0.605609	0.605688
GATA6-AS1	0.405147	0.162059	1.32189	-1.32139
GATAD1	0.492616	0.325199	0.599117	-0.59899
GATAD2A	0.224636	0.144464	0.63687	-0.636525
GATAD2B	0.972353	1.45853	-0.584894	0.584914
GATD1-DT	0.473711	0.684248	-0.530483	0.53042
GCA	0.0805188	0.160278	-0.993165	0.992286
GCC2	0.614117	0.738268	-0.265613	0.265592
GCHFR	1.01125	0.518588	0.963403	-0.963339
GCLM	0.648235	1.29647	-0.999907	0.999889
GDF15	0.18521	0.18521	6.07653e-07	-6.07336e-07
GDI2	1.94471	0.972354	0.999859	-0.999925
GEMIN4	0.518588	1.13441	-1.12919	1.12913
GEMIN7	0.926052	1.17861	-0.347885	0.347888
GEMIN7-AS1	0.0461756	0.0705127	-0.610749	0.609676
GEN1	0.0672797	0.112136	-0.737006	0.736156
GET4	0.852116	0.901892	-0.0818988	0.0818967
GFER	6.02859	5.64891	0.0937936	-0.0938468
GFOD1	0.486176	0.216078	1.16989	-1.16955
GGA3	0.0142993	0.0294652	-1.04307	1.0379
GGPS1	0.290843	0.62848	-1.11158	1.11136
GHR	1.29647	1.13441	0.192621	-0.192628
GIGYF1	0.648235	0.648235	0	0
GIN1	0.0972352	0.0648235	0.584958	-0.584222
GINS1	0.18521	0.186991	-0.0138041	0.013797
GIT2	0.0589305	0.0661465	-0.16665	0.166384
GJD3	2.10677	2.37686	-0.173991	0.174022
GLB1	0.324118	0.324118	0	0
GLCCI1	2.5722	1.32191	0.960193	-0.96032
GLI4	2.59294	6.15824	-1.24741	1.2479
GLMP	0.648236	0.324118	0.999954	-0.999778
GLRX3	0.212991	0.253657	-0.25208	0.251978
GLS	0.918908	0.423154	1.11867	-1.11856
GLTPD2	3.82459	3.04252	0.329923	-0.330026
GMCL1	0.435311	0.37042	0.232875	-0.232826
GMDS-DT	0.228789	0.553701	-1.27504	1.27472
GMNN	0.377642	0.512327	-0.440027	0.439946
GNA12	2.16078	1.94471	0.151972	-0.151995
GNAS	10.0476	14.5853	-0.537004	0.537653
GNE	0.108039	0.092605	0.222391	-0.222171
GNG12-AS1	0.540196	0.648236	-0.26302	0.262991
GNPAT	0.172863	0.482091	-1.47963	1.47914
GOLGA4	0.81734	1.15216	-0.495285	0.495282
GOLGA4-AS1	0.238824	0.183667	0.378848	-0.378675
GOLGA5	0.432157	0.153529	1.493	-1.49244
GOLGA6EP	0.0953287	0.153126	-0.683732	0.68317
GOLGA8B	0.324118	0.324118	1.16705e-06	-1.16673e-06
GOLIM4	0.243088	0.648235	-1.41498	1.41467
GOLT1B	0.0333205	0.0724735	-1.12104	1.11871
GORASP2	0.77112	1.08127	-0.487657	0.487648
GOSR1	0.493893	0.246329	1.00357	-1.00332
GOT2	0.0360131	0.0720261	-0.999995	0.998001
GPAA1	6.02684	10.8985	-0.853948	0.854639
GPAT4	0.0777881	0.206257	-1.4068	1.40566
GPAT4-AS1	0.0259294	0.0294652	-0.184425	0.18376
GPATCH4	0.274254	0.702255	-1.35642	1.35616
GPBP1	0.837878	1.27019	-0.60017	0.600174
GPC5	0.030386	0.0589304	-0.955601	0.953311
GPC6	0.480061	0.879748	-0.873816	0.873737
GPCPD1	0.388941	0.648235	-0.736927	0.736816
GPD2	0.800761	0.427835	0.904263	-0.90416
GPI	0.786157	0.810294	-0.0436244	0.0436224
GPN3	0.895719	1.24072	-0.470013	0.470018
GPNMB	0.30386	0.300966	0.013806	-0.0138018
GPR107	0.162059	0.108039	0.584955	-0.584518
GPR199P	0.324118	0.162059	0.999977	-0.999555
GPR35	0.530374	1.36129	-1.35978	1.35973
GPRC5C	1.70162	0.690512	1.30102	-1.30105
GPRIN3	0.324118	0.324118	0	0
GPS2	56.3728	25.8532	1.12027	-1.12465
GRB2	0.162059	0.324118	-0.999977	0.999556
GRB7	1.78265	1.81286	-0.0242426	0.0242456
GREB1	4.86176	6.48236	-0.414804	0.415031
GRK2	0.601933	1.16682	-0.95483	0.954796
GRK5	0.756275	1.29647	-0.777529	0.777528
GSAP	0.108039	0.092605	0.222391	-0.222171
GSE1	0.518588	0.729265	-0.491823	0.491773
GSS	0.243088	0.277815	-0.19264	0.192571
GSTZ1	0.129647	0.138907	-0.0995328	0.09946
GTDC1	0.162059	0.324118	-0.999977	0.999555
GTF2A1	1.95923	1.30375	0.587518	-0.587575
GTF2F1	0.324118	0.324118	0	0
GTF2H1	0.629169	0.8283	-0.396676	0.39665
GTF2H2C	0.092605	0.0648235	0.514569	-0.513906
GTF2I	0.127462	0.168061	-0.398913	0.398645
GTF3C2-AS2	0.684927	1.38758	-1.01845	1.01845
GTPBP2	3.37377	2.755	0.292219	-0.292298
GTPBP3	0.787143	0.781696	0.010018	-0.0100175
GTPBP8	0.0255882	0.0347712	-0.442413	0.44093
GTSE1	0.202573	0.216078	-0.093107	0.0930645
GTSE1-DT	1.76464	1.20194	0.553933	-0.553976
GUCD1	0.060409	0.0287524	1.07108	-1.06846
GULP1	1.92156	1.34277	0.516975	-0.517026
GZF1	1.13441	1.78265	-0.651983	0.652031
H1-5	16.2059	23.1204	-0.511653	0.512646
H2AC11	0.32164	0.628534	-0.966502	0.966327
H2AC12	0.214088	0.336331	-0.651658	0.651431
H2AC15	0.463025	0.623746	-0.429845	0.429788
H2AC20	0.4235	0.377202	0.167019	-0.166984
H2AC6	0.286691	0.710849	-1.30998	1.30974
H2AC7	0.07125	0.0578781	0.299871	-0.299406
H2AC8	0.166885	0.366168	-1.13362	1.13318
H2AJ	0.153281	0.286969	-0.904701	0.904282
H2AZ2-DT	0.0102682	0.0240611	-1.22852	1.22052
H2BC11	0.324117	0.182316	0.830053	-0.829728
H2BC15	0.253138	0.343643	-0.44097	0.440833
H2BC17	0.135803	0.140494	-0.0489922	0.0489574
H2BC21	1.32058	0.878857	0.587405	-0.587414
H2BC4	0.856823	0.669146	0.356649	-0.356629
H3-3A	8.42706	12.1004	-0.521424	0.521948
H3-3B	0.432157	0.864314	-0.999938	0.999833
H3C1	0.34941	0.520965	-0.576241	0.57613
H3C10	0.155013	0.259558	-0.743653	0.743294
H3C4	0.07125	0.0578781	0.299871	-0.299406
H4C3	0.0413457	0.061165	-0.564968	0.563842
H4C5	0.171784	0.385358	-1.16557	1.16514
H4C9	0.0456422	0.0684559	-0.584801	0.583753
HAAO	0.206257	0.108039	0.932871	-0.93225
HACD1	0.129647	0.144052	-0.152001	0.151892
HACD3	0.0444867	0.0264586	0.749636	-0.747435
HADHB	0.648235	0.388941	0.736929	-0.736818
HAPSTR1	0.85231	1.33248	-0.644599	0.644607
HARBI1	0.0184292	0.0452502	-1.29593	1.29131
HASPIN	0.137504	0.0889008	0.629202	-0.628635
HAUS2	0.152526	0.270098	-0.824411	0.824017
HAUS3	0.648235	0.972353	-0.584916	0.584888
HAVCR1	0.324118	0.324118	0	0
HAX1	2.311	1.088	1.08667	-1.08677
HCG27	0.0810294	0.216078	-1.41502	1.41393
HDAC1	0.0463025	0.0308683	0.58496	-0.583409
HDAC4-AS1	0.12075	0.13346	-0.144389	0.144277
HDAC7	1.62059	2.26882	-0.485334	0.485402
HDGFL3	0.648235	0.324118	0.999953	-0.999777
HDLBP	0.324118	0.423846	-0.387009	0.386919
HEATR4	1.78265	1.78265	-7.46264e-08	7.46355e-08
HECTD1	0.434892	0.76263	-0.810279	0.810183
HECTD2	3.99745	7.29265	-0.866887	0.867346
HECW2	0.324118	0.648235	-0.999953	0.999777
HELZ-AS1	11.6682	16.2059	-0.473277	0.473928
HERPUD1	1.28258	1.83146	-0.513867	0.513912
HERPUD2	1.72032	0.702255	1.29246	-1.29249
HERPUD2-AS1	0.772896	0.972353	-0.331177	0.331168
HEXD	1.6566	4.53765	-1.4533	1.45366
HEXIM2	0.648235	0.237686	1.4474	-1.44708
HFE-AS1	2.16079	2.07435	0.0588832	-0.0588929
HGS	2.40974	2.24722	0.100717	-0.100736
HHAT	0.202573	0.162059	0.321921	-0.321749
HIBCH	0.0972353	0.243088	-1.32191	1.32104
HIF1A-AS1	0.528286	0.719651	-0.445951	0.445906
HIGD2A	0.276395	0.301373	-0.124814	0.124774
HIGD2B	0.0274676	0.0463025	-0.753357	0.751229
HINT1	2.755	1.29647	1.08725	-1.0874
HINT3	0.540196	0.702255	-0.378489	0.37845
HIPK1	0.252092	0.432157	-0.77758	0.777368
HIPK1-AS1	0.60772	1.21544	-0.999914	0.999883
HIPK3	2.38669	4.94279	-1.04995	1.05029
HIRA	0.0144052	0.0219741	-0.60921	0.605781
HIRIP3	0.415276	0.159839	1.37741	-1.3769
HIVEP1	0.202573	0.084888	1.2548	-1.25383
HK2	0.361806	0.700618	-0.953364	0.95322
HM13	0.0444504	0.0481796	-0.116227	0.115977
HM13-AS1	1.30944	1.42672	-0.123744	0.123752
HMG20A	0.0412888	0.0350397	0.236759	-0.236139
HMGA2	0.494706	0.634731	-0.359553	0.359509
HMGB1	0.0675244	0.165507	-1.29339	1.29214
HMGB2	1.13441	0.972353	0.22237	-0.222372
HMGCR	0.240474	0.259294	-0.108703	0.108662
HMGN1	0.117042	0.0440159	1.41092	-1.40889
HMGN2	0.817661	0.877818	-0.102412	0.102408
HMMR	4.30357	3.5833	0.26414	-0.264237
HNF1A	0.500909	0.756275	-0.594326	0.594265
HNRNPA1	1.04025	1.43818	-0.467257	0.467276
HNRNPA2B1	0.331164	0.162059	1.031	-1.03057
HNRNPAB	0.191469	0.468061	-1.28954	1.28914
HNRNPD	0.324118	0.583412	-0.847958	0.847798
HNRNPDL	1.83667	4.53765	-1.30447	1.30481
HNRNPH1	17.6644	7.99491	1.1423	-1.14368
HNRNPH3	0.105889	0.139563	-0.39836	0.398036
HNRNPM	0.1806	0.319053	-0.820978	0.820652
HNRNPR	0.486176	0.324118	0.584938	-0.584813
HOXA-AS2	0.0308683	0.052277	-0.760048	0.758142
HOXA3	0.972353	1.29647	-0.414991	0.415
HP1BP3	0.324118	0.540196	-0.736935	0.736788
HPGD	0.216078	0.0810294	1.41502	-1.41393
HPS4	0.0405147	0.0313662	0.369232	-0.368198
HRG-AS1	2.10677	1.08039	0.963327	-0.96341
HSBP1L1	1.62059	1.70162	-0.0703783	0.0703857
HSCB	0.432157	0.486177	-0.169918	0.169889
HSD11B1L	0.346446	0.685126	-0.983691	0.983534
HSD11B2	0.686367	0.617367	0.152842	-0.152829
HSD17B1	1.08039	1.08039	3.12474e-07	-3.12478e-07
HSD17B1-AS1	3.88941	3.56529	0.125484	-0.125528
HSD17B12	0.0350047	0.0960349	-1.456	1.4534
HSD17B6	0.324118	0.324118	0	0
HSDL2-AS1	0.416723	0.265187	0.652055	-0.651879
HSP90AB1	0.415236	0.371914	0.158958	-0.158923
HSP90B1	1.33699	1.57607	-0.237318	0.237336
HSPA1B	0.598371	0.657496	-0.135932	0.135919
HSPA8	0.00599555	0.0115251	-0.942811	0.931411
HSPB1	0.489473	0.575966	-0.23474	0.234708
HSPD1	0.00624303	0.0127105	-1.0257	1.01408
HTRA2	1.34747	0.610251	1.14267	-1.14265
HTT	0.972353	0.972353	3.1225e-16	-1.59595e-16
HULC	0.157017	0.29066	-0.888395	0.887992
HUNK	0.702254	1.94471	-1.46931	1.46936
HYAL2	1.62059	0.648235	1.32179	-1.3218
HYI	0.857958	1.0884	-0.34319	0.343187
HYI-AS1	0.648235	0.818011	-0.335579	0.335557
HYPK	2.37118	2.743	-0.210095	0.210141
IARS2	0.168541	0.299563	-0.829741	0.829386
ICA1	2.33365	0.972353	1.26284	-1.26295
ICE2	0.0079053	0.0203279	-1.36257	1.35152
ID2	6.15824	6.5904	-0.0977851	0.0978459
IDE	0.648235	1.29647	-0.999908	0.99989
IDH1-AS1	0.18521	0.486176	-1.39227	1.39184
IDNK	1.18843	2.02249	-0.766957	0.767027
IER2	0.311323	0.567206	-0.865423	0.86525
IER3	0.972353	1.29647	-0.414991	0.415
IER5L-AS1	0.108039	0.259294	-1.26301	1.26226
IFI30	1.97025	2.62509	-0.413889	0.413965
IFIH1	0.150483	0.055563	1.43739	-1.43577
IFNGR1	0.259294	0.567206	-1.12924	1.12898
IFNGR2	0.243088	0.324118	-0.415025	0.414888
IFRD1	0.127302	0.122053	0.0607467	-0.0606988
IFRD2	0.0810294	0.0810294	9.40472e-08	-9.39321e-08
IFT122	0.0540196	0.0324117	0.736963	-0.73519
IFT20	1.29647	0.648236	0.999906	-0.999888
IFT70B	1.17861	2.26882	-0.944702	0.9448
IFT80	0.092605	0.216078	-1.22238	1.2215
IFT81	0.0437996	0.0720261	-0.717597	0.716312
IGDCC3	1.62059	0.972353	0.736872	-0.736906
IGDCC4	0.972353	0.810294	0.263011	-0.263005
IGF1R	1.14089	1.55113	-0.4431	0.443125
IGF2-AS	0.324118	0.648235	-0.999952	0.999776
IGF2BP1	0.141651	0.306545	-1.11373	1.11321
IGF2BP2	0.688486	1.18843	-0.787488	0.787472
IGF2R	0.556042	0.841326	-0.597432	0.597385
IGFBP3	0.486176	0.648236	-0.415015	0.414964
IGHMBP2	0.0990359	0.069025	0.520827	-0.520199
IK	0.0504614	0.039769	0.343532	-0.342767
IKBKB-DT	0.0350397	0.092605	-1.40209	1.39955
IKZF2	0.648235	0.540196	0.263018	-0.262989
IL18	0.324118	0.324118	2.22045e-16	-2.22045e-16
IL1RAP	0.510485	0.324118	0.655325	-0.655189
IL6R-AS1	1.34634	1.56657	-0.218539	0.218555
IMMT	0.0231512	0.0115756	0.999999	-0.993809
IMP3	0.186991	0.249321	-0.41503	0.414847
IMPACT	0.518588	0.486176	0.0931054	-0.0930916
INCENP	0.202574	0.193466	0.0663682	-0.066336
ING5	0.106672	0.202574	-0.925257	0.924631
INKA2	0.00887992	0.0129647	-0.545968	0.540898
INO80B-WBP1	0.907529	0.364632	1.31542	-1.31527
INO80C	0.0511765	0.0463025	0.14439	-0.144095
INO80E	0.353057	0.234985	0.587313	-0.587124
INPP5A	0.0810294	0.152526	-0.912526	0.911702
INPP5F	0.243088	0.162059	0.584951	-0.584666
INSIG2	0.729265	1.16682	-0.678009	0.677998
INSR	0.648235	0.972353	-0.584916	0.584888
INTS13	0.00589304	0.0127105	-1.10894	1.09597
INTS15	0.335851	0.433858	-0.369389	0.369306
INTS8	0.116	0.240633	-1.05269	1.05206
INVS	0.277815	0.432157	-0.637408	0.637245
IPO11	0.842707	1.6566	-0.975006	0.97504
IPO7	0.227255	0.494279	-1.12098	1.12067
IPP	0.0113725	0.0154342	-0.440574	0.437262
IQCE	0.756275	0.353583	1.0968	-1.09665
IQCG	1.82005	2.21655	-0.284281	0.284324
IQCH	0.0388941	0.0540196	-0.473929	0.472894
IRF1-AS1	0.092605	0.0810294	0.192644	-0.192423
IRF2	1.29647	2.26882	-0.807215	0.807307
IRF3	2.46329	1.32594	0.893413	-0.893527
IRGQ	2.26882	0.972353	1.22221	-1.22231
IRS1	0.432157	0.648235	-0.58493	0.58485
ISG20	0.628981	1.18414	-0.912677	0.912649
ITGA1	0.495016	0.291706	0.762932	-0.762758
ITGA6	0.363644	0.589305	-0.696455	0.696336
ITGAV	0.37344	0.536268	-0.522054	0.521961
ITGB1	1.94471	5.18588	-1.41457	1.41499
ITGB4	0.810295	0.324118	1.32186	-1.32166
ITGB5	2.59294	1.29647	0.999813	-0.999944
ITPA	0.0272368	0.0639105	-1.23049	1.22747
ITPKA	1.03553	0.994286	0.0586282	-0.0586284
ITPKC	3.88941	2.70098	0.525897	-0.526052
ITPR1	0.0152526	0.0405147	-1.40939	1.40352
ITPR2	0.324118	0.324118	0	0
ITPR3	0.770875	0.447059	0.785985	-0.785896
ITPRIPL2	3.35904	1.58499	1.08332	-1.08353
JMJD1C	0.221549	0.401906	-0.859208	0.858942
JMJD4	0.648235	0.486176	0.415014	-0.414963
JMJD8	6.8875	14.9094	-1.11302	1.11416
JPT2	0.311651	0.113064	1.46276	-1.46198
JRK	0.648235	0.648235	0	0
JUN-DT	0.121544	0.103128	0.237035	-0.236826
KANK1	0.259294	0.378137	-0.544304	0.544146
KANK4	0.092605	0.0551689	0.747229	-0.746179
KANSL1	0.33821	0.307059	0.139399	-0.13936
KAT14	0.183666	0.311153	-0.760518	0.760214
KAT5	1.94471	1.546	0.330954	-0.330992
KATNA1	0.216078	0.324118	-0.584947	0.584741
KBTBD2	2.80902	1.58647	0.82407	-0.824207
KBTBD4	0.767647	1.08811	-0.503262	0.503253
KCNMB3	0.0810294	0.162059	-0.999989	0.999111
KCNQ1	1.62059	0.972353	0.736873	-0.736907
KCNT2	0.0270098	0.0120044	1.16992	-1.16329
KCTD15	0.486176	1.35049	-1.47381	1.47374
KCTD18	0.324118	0.162059	0.999977	-0.999555
KDELR2	1.11126	0.405147	1.45558	-1.45545
KDELR3	0.270098	0.162059	0.73695	-0.73661
KDM1A	0.492179	0.469118	0.0692292	-0.0692182
KDM2A	0.350047	0.292906	0.2571	-0.257028
KDM2B	0.324118	0.648236	-0.999954	0.999778
KDM4C	0.0864313	0.236336	-1.45119	1.45015
KDM6B	1.64552	3.24118	-0.977744	0.977931
KDM8	0.0997285	0.0810294	0.299558	-0.299227
KHDRBS3	0.0283072	0.0316212	-0.159722	0.15919
KHK	0.810295	0.972353	-0.26301	0.263004
KIAA1671	1.00837	1.42612	-0.500013	0.500031
KIF12	0.324118	0.324118	0	0
KIF13B	0.0810294	0.108039	-0.415033	0.414592
KIF1C	0.396351	0.368134	0.106545	-0.106521
KIF21A	1.91351	1.89855	0.0113214	-0.0113229
KIF22	0.0648235	0.162059	-1.32191	1.32059
KIF2A	0.842707	1.6566	-0.975006	0.97504
KILH	16.8136	29.1706	-0.793107	0.794882
KIRREL1	4.21353	2.91706	0.530327	-0.530499
KISS1R	0.367333	0.93634	-1.34986	1.3497
KLB	0.0928651	0.245092	-1.4001	1.39915
KLHL12	0.0454902	0.0288105	0.658958	-0.65713
KLHL17	2.2148	1.16682	0.924441	-0.924533
KLHL21	0.0810294	0.162059	-0.999989	0.999111
KLHL23	0.247673	0.532039	-1.10305	1.10278
KLHL42	0.607721	0.274253	1.14785	-1.14761
KLHL7	0.0553371	0.0390503	0.502911	-0.501828
KLHL9	0.108039	0.0810294	0.415035	-0.414594
KMT2D	0.648235	0.648235	0	0
KMT2E-AS1	0.0182748	0.0136638	0.419504	-0.416857
KNL1	0.0405147	0.105527	-1.38108	1.3789
KPNA2	2.07107	2.2085	-0.0926696	0.0926851
KPNA4	0.412514	0.237435	0.796884	-0.796651
KPNA5	0.266239	0.149814	0.829532	-0.829128
KPNA6	0.0978468	0.200644	-1.03603	1.03529
KRAS	0.486177	1.29647	-1.41492	1.41485
KRBOX5	0.206037	0.236989	-0.20191	0.201823
KRT8	2.63692	3.39473	-0.364335	0.364432
L3MBTL1	0.711311	0.396681	0.842454	-0.842339
L3MBTL3	0.648235	1.62059	-1.32179	1.3218
LACTB	0.140569	0.275868	-0.97268	0.972196
LAMC1	1.1648	1.18028	-0.0190441	0.0190447
LAMTOR2	0.55563	0.355894	0.642648	-0.642531
LAPTM4A	0.0294652	0.0405147	-0.459431	0.458101
LAPTM4B	0.897059	0.908262	-0.0179047	0.0179043
LARP1	1.29647	1.35762	-0.0664865	0.0664903
LARP1B	0.648235	0.802577	-0.3081	0.30808
LARP4	0.0942775	0.19396	-1.04076	1.03999
LARP4B	0.127332	0.341176	-1.4219	1.42122
LASP1	0.027061	0.0291907	-0.109292	0.108905
LATS1	0.138908	0.0810294	0.7776	-0.776867
LATS2	0.0196435	0.0463025	-1.23704	1.23283
LBHD1	0.0190657	0.0111765	0.770517	-0.765215
LBR	0.540196	0.324117	0.736935	-0.736788
LBX2	0.983157	0.918333	0.0983954	-0.0983944
LBX2-AS1	0.273069	0.195995	0.478438	-0.478242
LCMT1	0.0480174	0.126829	-1.40124	1.39939
LDHA	0.324118	0.158376	1.03314	-1.0327
LDLR	0.391405	1.10472	-1.49684	1.4967
LEMD2	1.16682	2.59294	-1.1518	1.15194
LEMD3	0.0842706	0.0921293	-0.12863	0.128485
LGALS8	1.68934	1.68811	0.00105063	-0.00105075
LGALS8-AS1	0.0789516	0.111641	-0.499815	0.499285
LHFPL2	1.13441	2.34985	-1.05045	1.05056
LIAS	0.0762629	0.097989	-0.361636	0.36122
LIMASI	0.792534	1.92156	-1.27757	1.27762
LIMK1	1.04715	0.373982	1.48533	-1.48518
LIMK2	0.0660239	0.172187	-1.3829	1.38157
LIMS1	5.99618	12.3165	-1.03756	1.03846
LIN28B	0.906017	0.728814	0.313963	-0.31395
LIN7A	0.324118	0.486176	-0.584939	0.584814
LINC-PINT	1.62059	3.88941	-1.26271	1.26298
LINC00205	1.20386	1.29647	-0.106903	0.106907
LINC00235	0.324118	0.324118	2.22045e-16	-2.22045e-16
LINC00261	6.48235	2.91706	1.15149	-1.15198
LINC00324	3.88941	4.86177	-0.321788	0.321921
LINC00339	0.0231512	0.0496396	-1.1004	1.09709
LINC00467	0.0154587	0.0261569	-0.758768	0.754972
LINC00513	0.162059	0.367333	-1.18054	1.18008
LINC00857	0.623303	0.972353	-0.641497	0.641464
LINC00880	0.648235	0.972353	-0.584916	0.584888
LINC00881	1.29647	1.29647	8.75203e-07	-8.75249e-07
LINC00886	0.380486	0.864314	-1.18364	1.1835
LINC00910	0.388942	0.138907	1.48539	-1.48476
LINC00933	1.29647	1.29647	0	0
LINC01011	19.9956	48.6177	-1.27768	1.2818
LINC01012	0.0623303	0.149593	-1.26302	1.26168
LINC01122	0.324118	0.144052	1.1699	-1.16937
LINC01132	0.343761	0.731342	-1.08909	1.08892
LINC01191	0.466883	0.424954	0.135748	-0.135724
LINC01521	2.18479	1.69054	0.369939	-0.369991
LINC01607	1.29647	0.583412	1.1519	-1.15187
LINC01635	5.32681	2.59294	1.03829	-1.03865
LINC01762	1.44052	0.648235	1.15189	-1.15188
LINC01823	0.243088	0.486176	-0.999966	0.999704
LINC01836	0.162059	0.0810294	0.999989	-0.999112
LINC02026	0.129647	0.360131	-1.4739	1.47322
LINC02210-CRHR1	0.388941	0.432157	-0.151997	0.151967
LINC02435	0.283603	0.216078	0.392308	-0.392159
LINC02453	1.5643	1.66825	-0.0928012	0.0928105
LINC02542	0.170588	0.0648235	1.39591	-1.39455
LINC02608	0.108039	0.0810294	0.415034	-0.414593
LINC02766	0.243088	0.162059	0.584952	-0.584667
LINC02777	0.0162059	0.0249321	-0.621487	0.618388
LINC02891	0.324118	0.648235	-0.999953	0.999777
LINC02901	0.0778724	0.176791	-1.18285	1.18183
LINC02916	0.324117	0.144052	1.1699	-1.16937
LINC02934	0.0153529	0.0430646	-1.48798	1.48197
LINC03006	0.0202573	0.0373982	-0.884521	0.881271
LINC03009	0.135049	0.147326	-0.125529	0.125442
LIPT1	0.109049	0.0782577	0.478665	-0.47815
LLGL2	0.729264	1.13441	-0.637372	0.63736
LMF2	0.324118	0.324118	0	0
LMNA	0.915155	1.29647	-0.502446	0.502455
LMO4	0.419446	0.360131	0.219956	-0.219908
LNPEP	0.486176	0.810294	-0.736919	0.736847
LNPK	0.0149593	0.0249321	-0.736964	0.733128
LOC100129931	0.518588	0.453765	0.192635	-0.192605
LOC100130283	0.109287	0.195557	-0.839451	0.838882
LOC100288637	0.542401	0.674694	-0.314854	0.314821
LOC100289230	0.261095	0.324118	-0.311935	0.311837
LOC100505985	0.13592	0.282564	-1.0558	1.05527
LOC100506639	0.109701	0.259294	-1.24099	1.24025
LOC100507250	1.36129	2.67397	-0.973816	0.973953
LOC100630923	0.102691	0.206884	-1.0105	1.00981
LOC100652758	1.62059	4.21353	-1.37814	1.37846
LOC100996664	0.129647	0.0498642	1.3785	-1.37673
LOC101927259	0.0769488	0.042808	0.846013	-0.844526
LOC101927385	0.505242	1.20887	-1.25851	1.25845
LOC101927604	0.92605	1.37922	-0.57463	0.574644
LOC101927609	0.78153	0.326857	1.25758	-1.25739
LOC101927702	11.1497	10.3718	0.104225	-0.104336
LOC101927741	0.0649548	0.0638846	0.0239685	-0.0239315
LOC101927896	0.162059	0.324118	-0.999977	0.999555
LOC101928180	1.5628	1.59646	-0.0307432	0.0307461
LOC101928565	0.142612	0.168541	-0.241004	0.240852
LOC101928953	0.563683	0.648235	-0.201621	0.2016
LOC101929004	0.0972353	0.108039	-0.152001	0.151854
LOC101929128	0.648236	0.324118	0.999954	-0.999778
LOC101929185	0.972353	0.486176	0.999929	-0.999851
LOC101929200	0.378137	0.324118	0.222385	-0.222329
LOC101929633	0.713058	0.509328	0.485396	-0.485345
LOC101929710	1.9447	1.94471	-1.13254e-06	1.13271e-06
LOC101929767	0.161071	0.346997	-1.1072	1.10675
LOC101929918	0.261385	0.0982175	1.4121	-1.41121
LOC102723701	8.10294	3.24118	1.32123	-1.3219
LOC102723834	0.092605	0.0810294	0.192644	-0.192423
LOC102724389	1.23165	0.680647	0.855531	-0.855516
LOC102724474	1.62059	1.29647	0.321882	-0.321907
LOC102724830	0.0907529	0.142246	-0.648365	0.647797
LOC105369373	15.1795	12.9971	0.22362	-0.223933
LOC105369705	6.80647	6.48235	0.0703426	-0.0703882
LOC105370327	0.562941	1.24245	-1.14204	1.14199
LOC105370420	1.53956	0.648235	1.2478	-1.2478
LOC105370461	0.0596376	0.0675244	-0.179186	0.178905
LOC105370462	0.0622305	0.0675244	-0.117786	0.117605
LOC105370532	0.0344473	0.0632425	-0.876499	0.874601
LOC105370834	0.178823	0.474319	-1.40728	1.40682
LOC105370906	0.648236	1.29647	-0.999906	0.999888
LOC105371038	4.01906	5.51	-0.45498	0.455185
LOC105371059	0.0391176	0.0376881	0.0537095	-0.0535701
LOC105371348	0.0536882	0.0961668	-0.840928	0.839749
LOC105371716	0.0569396	0.122444	-1.10461	1.10327
LOC105371756	1.29647	0.648235	0.999907	-0.999889
LOC105372430	0.145853	0.121544	0.26303	-0.262836
LOC105372468	0.114395	0.108039	0.0824618	-0.0823886
LOC105372988	0.176791	0.362249	-1.03491	1.03452
LOC105373835	2.67397	3.74536	-0.485966	0.486105
LOC105374114	0.324118	0.324118	0	0
LOC105374511	0.203368	0.324118	-0.672408	0.672162
LOC105374576	1.94471	1.78265	0.125507	-0.125523
LOC105374764	0.972353	1.62059	-0.736872	0.736906
LOC105374800	0.810294	0.324118	1.32186	-1.32166
LOC105374813	0.324118	0.567206	-0.80732	0.807164
LOC105374928	0.324118	0.648235	-0.999953	0.999777
LOC105374971	4.53765	1.72863	1.39191	-1.39227
LOC105375501	0.648235	0.972353	-0.584916	0.584888
LOC105375509	0.0436522	0.0477228	-0.128624	0.128344
LOC105376041	5.18588	2.16078	1.2626	-1.263
LOC105376042	0.0917314	0.144052	-0.651097	0.650534
LOC105376431	0.0505118	0.138908	-1.45942	1.45762
LOC105376494	0.245278	0.138908	0.820277	-0.819842
LOC105376781	0.277815	0.486176	-0.807325	0.807133
LOC105377261	5.2399	2.26882	1.20717	-1.20756
LOC105377286	14.2612	6.15824	1.21034	-1.21149
LOC105377294	0.648236	0.972353	-0.584916	0.584888
LOC105377921	0.324118	0.162059	0.999977	-0.999555
LOC105377927	0.108039	0.0405147	1.41503	-1.41282
LOC105378268	0.0180065	0.0486176	-1.43296	1.42794
LOC105378560	0.648235	0.972353	-0.584916	0.584888
LOC105378895	0.18521	0.0810294	1.19263	-1.19164
LOC105379356	0.432157	0.648235	-0.584931	0.584851
LOC105379385	3.24118	1.45853	1.15175	-1.15195
LOC107983990	0.206589	0.238025	-0.204346	0.204259
LOC107983998	0.17188	0.232519	-0.435935	0.435725
LOC107984282	1.72863	1.29647	0.414976	-0.41501
LOC107984755	0.55563	0.648235	-0.222379	0.222355
LOC107985068	0.0243088	0.0432157	-0.830073	0.827488
LOC107985152	0.0494416	0.036013	0.457205	-0.456122
LOC107985388	0.036013	0.0413767	-0.200298	0.199781
LOC107985532	0.486176	0.457578	0.0874589	-0.0874445
LOC107985892	1.23165	0.680647	0.855531	-0.855516
LOC107986064	0.878964	0.74084	0.246622	-0.246612
LOC107986166	0.324118	0.648235	-0.999953	0.999777
LOC107986434	1.50201	0.988558	0.60342	-0.603445
LOC107986579	2.28908	3.24677	-0.504097	0.504216
LOC107987007	0.486176	0.324118	0.584939	-0.584814
LOC112267899	0.0609065	0.0675244	-0.148813	0.148582
LOC112268030	0.0737828	0.092605	-0.327802	0.327408
LOC112694756	0.762596	1.31069	-0.781254	0.781254
LOC114841035	7.41891	9.72353	-0.389942	0.39027
LOC118567325	0.106351	0.094686	0.167609	-0.167444
LOC124900165	0.121544	0.092605	0.392313	-0.391947
LOC124900190	0.144052	0.113441	0.344643	-0.344377
LOC124900217	4.94279	9.72354	-0.975465	0.97614
LOC124900275	0.324117	0.792287	-1.28944	1.28924
LOC124900276	0.810295	1.94471	-1.26287	1.26293
LOC124900301	0.473711	0.648235	-0.452486	0.452429
LOC124900387	0.0504183	0.0810293	-0.684492	0.683418
LOC124900391	0.161071	0.342962	-1.09033	1.08988
LOC124900605	0.0762629	0.131814	-0.789441	0.788652
LOC124900718	0.0294652	0.0810294	-1.45942	1.45632
LOC124900809	1.77493	4.86177	-1.45327	1.45367
LOC124900944	0.486176	0.216078	1.16989	-1.16955
LOC124900982	9.8856	12.4245	-0.329423	0.329786
LOC124901011	0.940646	0.376395	1.32132	-1.32118
LOC124901081	0.00868171	0.0211381	-1.28379	1.27408
LOC124901281	1.51255	3.5653	-1.23674	1.23698
LOC124901321	0.324118	0.324118	0	0
LOC124901339	0.648235	0.324118	0.999953	-0.999777
LOC124901365	0.854493	0.648235	0.398521	-0.398497
LOC124901389	0.724093	0.37042	0.966961	-0.966822
LOC124901391	0.283603	0.375976	-0.406756	0.406644
LOC124901581	0.648235	0.265187	1.28945	-1.28919
LOC124901899	0.129647	0.324118	-1.3219	1.32126
LOC124901950	0.648236	1.62059	-1.32179	1.32179
LOC124901992	0.291706	0.226882	0.362562	-0.36243
LOC124902204	0.270098	0.136471	0.984875	-0.984371
LOC124902437	0.854492	0.540196	0.661538	-0.661485
LOC124902695	0.657115	0.3436	0.935371	-0.935216
LOC124902923	7.61677	2.78741	1.44956	-1.45022
LOC124902941	4.39127	1.94471	1.17473	-1.17504
LOC124902947	1.18843	1.62059	-0.447398	0.447428
LOC124902988	1.29647	0.540196	1.26293	-1.26288
LOC124903189	7.83776	4.93122	0.668077	-0.668485
LOC124903194	0.648236	0.432157	0.584932	-0.584852
LOC124903296	0.972353	0.810294	0.263011	-0.263005
LOC124903388	0.228476	0.245221	-0.102034	0.101993
LOC124903450	2.26882	2.755	-0.280038	0.280097
LOC124903478	0.642002	0.482021	0.413458	-0.413407
LOC124903507	0.55563	0.237686	1.22502	-1.22472
LOC124903554	0.432157	0.648235	-0.584931	0.584851
LOC124903558	0.00838958	0.0194172	-1.21066	1.20098
LOC124903687	0.0617366	0.0714965	-0.211746	0.211429
LOC124903722	0.0320555	0.0158106	1.01968	-1.01508
LOC124903933	0.252091	0.162059	0.637418	-0.637113
LOC124904060	0.0463025	0.092605	-0.999991	0.998443
LOC124904167	0.57147	0.720261	-0.333821	0.33379
LOC124904223	0.0341176	0.0589304	-0.788494	0.786721
LOC124904420	3.306	1.89069	0.805973	-0.806144
LOC124904558	2.43088	3.45726	-0.508	0.508131
LOC124904611	4.21353	2.73699	0.622224	-0.622419
LOC124904707	1.62059	1.08039	0.584884	-0.584917
LOC124904771	0.274253	0.347269	-0.340534	0.340434
LOC124904993	0.216078	0.092605	1.22238	-1.2215
LOC124905080	0.648235	1.13441	-0.807285	0.80726
LOC124905135	1.76908	1.42993	0.307007	-0.307037
LOC124906071	3.04311	6.84249	-1.16843	1.16895
LOC124906074	0.216078	0.162059	0.41503	-0.414815
LOC124906110	0.672896	1.26082	-0.905818	0.905803
LOC124907725	0.108039	0.121544	-0.169922	0.169775
LOC124907753	2.26882	0.810294	1.48522	-1.48531
LOC124907768	0.378137	0.665294	-0.815041	0.814918
LOC124907771	0.0720262	0.168061	-1.22238	1.22125
LOC124907968	0.18521	0.129647	0.514565	-0.51424
LOC124908062	0.0762629	0.131814	-0.789441	0.788652
LOC125312414	0.142612	0.168541	-0.241004	0.240852
LOC128092252	0.0115756	0.0108039	0.0995344	-0.0986522
LOC388282	0.121544	0.0540196	1.16992	-1.16844
LOC440982	0.789156	0.55563	0.506151	-0.506108
LOC644656	0.972353	0.713059	0.447422	-0.447405
LOC645485	0.108039	0.117861	-0.125529	0.12542
LOC645967	2.26882	1.94471	0.222346	-0.222382
LOC728743	0.351128	0.141801	1.30809	-1.30752
LOC729291	0.0360131	0.0463025	-0.362569	0.361682
LONP1	3.21575	3.39077	-0.0764297	0.0764526
LPIN2	0.0810294	0.0810294	9.40472e-08	-9.39321e-08
LPP	0.603529	0.648235	-0.103088	0.103078
LRCH3	0.0463025	0.0568627	-0.296391	0.295815
LRG1	0.108039	0.0747963	0.530511	-0.529923
LRIF1	1.45853	1.29647	0.169901	-0.169912
LRIG3-DT	0.0589305	0.162059	-1.45942	1.45788
LRP3	0.189069	0.486176	-1.36253	1.3621
LRP5	0.956147	1.97029	-1.04296	1.04303
LRRC1	0.972353	0.453765	1.09946	-1.09937
LRRC37A2	2.05274	1.36129	0.592475	-0.592539
LRRC3C	0.0166214	0.0262798	-0.66091	0.657737
LRRC8A	0.453764	0.171592	1.40292	-1.40244
LRRC8D	0.648235	0.427246	0.601418	-0.601335
LRRC9	0.324117	0.324118	-7.00231e-07	7.00037e-07
LRSAM1	0.495709	0.648235	-0.387001	0.386954
LRTOMT	0.162059	0.0810294	0.999989	-0.999112
LSM14B	0.179299	0.264412	-0.560405	0.560159
LSM3	0.00701553	0.0193503	-1.46373	1.45075
LSM4	0.486176	0.324118	0.584939	-0.584814
LSM7	0.0231513	0.0540196	-1.22239	1.21884
LSM8	0.698879	0.707941	-0.0185861	0.0185848
LSP1P4	0.324118	0.216078	0.584947	-0.58474
LTB4R2	0.51158	0.610656	-0.255386	0.255355
LTBP1	0.532479	0.405147	0.394262	-0.394195
LTBR	1.31056	1.90731	-0.541264	0.541316
LUC7L	0.0810294	0.0432157	0.906885	-0.905336
LUC7L2	0.33821	0.670858	-0.988042	0.987879
LUC7L3	0.0702254	0.0693763	0.0175502	-0.0175252
LURAP1L	1.10348	0.754586	0.548257	-0.548247
LURAP1L-AS1	0.180065	0.222831	-0.307422	0.307275
LYPD6B	2.22831	0.864314	1.36613	-1.36622
LYPLA2	0.50594	0.816101	-0.689736	0.689673
LYRM1	1.4874	4.14871	-1.47949	1.47981
LYRM4	8.10295	4.69971	0.785386	-0.785864
LYSMD1	0.0463025	0.0243088	0.929608	-0.926801
LYST	0.243088	0.324118	-0.415026	0.414889
LZTR1	0.0607721	0.0525596	0.209453	-0.209084
LZTS2	2.26882	0.972353	1.22221	-1.22231
MACF1	0.324118	0.351127	-0.115472	0.115442
MACIR	0.648236	0.850809	-0.392288	0.392264
MACO1	0.324118	0.810294	-1.32186	1.32166
MACROH2A2	1.05338	0.494199	1.09178	-1.09171
MAD2L1BP	0.348112	0.23351	0.57605	-0.575863
MADD	0.239348	0.516177	-1.10871	1.10843
MAEA	0.100837	0.187765	-0.896895	0.896245
MAF1	0.698568	1.36027	-0.961329	0.961324
MAFF	2.58177	2.30695	0.16233	-0.162363
MAFK	0.54559	0.99403	-0.865407	0.865353
MAGI2	0.324118	0.324118	0	0
MAGI3	0.30251	0.224389	0.430968	-0.430814
MAGOHB	0.0795006	0.0511764	0.635482	-0.634483
MAIP1	0.621699	0.820565	-0.400371	0.400344
MAL2	2.66497	3.88941	-0.545257	0.545416
MALAT1	74.7465	105.814	-0.497005	0.501447
MALSU1	0.336122	0.446008	-0.408068	0.407978
MALT1	0.388941	0.324118	0.263025	-0.26296
MALT1-AS1	0.243088	0.19447	0.321922	-0.321781
MAML1	0.500909	0.410549	0.286983	-0.286932
MAML3	0.540196	0.540196	5.89328e-07	-5.89251e-07
MAN1B1	0.291562	0.216078	0.432236	-0.432074
MAN1B1-DT	0.162059	0.324118	-0.999977	0.999556
MAN2A2	8.42706	3.07912	1.45174	-1.45248
MAN2B1	0.324118	0.324118	0	0
MAN2C1	0.0481546	0.0655952	-0.445913	0.445121
MANSC4	0.231513	0.0997284	1.21499	-1.21419
MAP1LC3B	0.60772	0.583412	0.058889	-0.0588826
MAP1S	0.0156201	0.0418216	-1.42084	1.41508
MAP2	0.200862	0.518588	-1.36834	1.36795
MAP2K4	1.45853	0.530374	1.4593	-1.45926
MAP3K1	1.94471	0.864314	1.16977	-1.16983
MAP3K11	1.08039	2.00953	-0.895169	0.895241
MAP3K2	0.0542766	0.0461377	0.234381	-0.233914
MAP3K21	4.53765	2.755	0.719634	-0.719871
MAP3K4	0.243088	0.194471	0.321922	-0.321781
MAP3K4-AS1	0.694537	0.713059	-0.0379662	0.0379634
MAP4K3-DT	1.86368	2.26882	-0.283735	0.283779
MAP4K4	0.328815	0.341425	-0.0542915	0.0542772
MAP7D1	0.972353	1.94471	-0.99986	0.999926
MAPK1	0.0648235	0.092605	-0.514568	0.513906
MAPK13	2.95934	2.65371	0.157217	-0.157256
MAPK14	0.467332	0.673168	-0.526488	0.526423
MAPK1IP1L	0.297783	0.200744	0.568891	-0.568671
MAPK6	6.01193	8.01381	-0.414372	0.414655
MAPK7	0.972353	1.55173	-0.674246	0.674274
MAPK9	0.0810294	0.144052	-0.830066	0.829296
MAPKAPK5-AS1	0.427835	0.47371	-0.146945	0.146919
MAPRE1	0.756275	0.452414	0.741222	-0.741138
MARCHF5	0.453765	0.577775	-0.348545	0.348494
MARCHF6-DT	0.0506433	0.0894118	-0.820087	0.818859
MARCHF7	0.11533	0.287172	-1.31612	1.3154
MARCKS	0.265428	0.452955	-0.771018	0.77082
MARK2	0.777882	1.13441	-0.544269	0.544262
MARK3	0.469971	1.01287	-1.10772	1.10764
MARK4	0.323798	0.256727	0.33485	-0.334743
MARS1	0.490012	0.992255	-1.01782	1.01774
MARVELD3	0.129647	0.216078	-0.736953	0.736521
MAST2	0.166214	0.37042	-1.15609	1.15564
MAST3	1.32164	0.727611	0.86101	-0.861006
MASTL	0.199457	0.21404	-0.101801	0.101754
MAVS	0.0709647	0.0667301	0.0887626	-0.0886344
MAZ	1.46736	2.67566	-0.866495	0.866625
MBD6	0.197289	0.20326	-0.0430156	0.042995
MBIP	0.513186	0.324118	0.662938	-0.662801
MBLAC1	0.249321	0.648235	-1.37845	1.37816
MBNL2	0.127648	0.34209	-1.42217	1.42149
MBTD1	0.162059	0.324118	-0.999978	0.999556
MCFD2	0.486176	1.05338	-1.1154	1.11532
MCL1	0.44353	0.486176	-0.132443	0.132421
MCM3AP	0.0540196	0.0518588	0.0588931	-0.0587824
MCM4	1.41753	1.75651	-0.309285	0.309314
MCM5	0.209108	0.326353	-0.642167	0.641937
MCM7	0.583412	0.702255	-0.267464	0.267439
MCM8	0.615824	1.16682	-0.921918	0.921887
MCM9	0.145081	0.324118	-1.15963	1.15911
MCMBP	0.486176	0.324118	0.584939	-0.584814
MCRIP2	0.864313	1.62059	-0.906783	0.906814
MCTS2	1.26608	1.32082	-0.0610491	0.0610523
MCU	0.226882	0.202574	0.163495	-0.163422
MDH2	0.0741255	0.155306	-1.06706	1.06606
MDK	7.19543	4.34289	0.728013	-0.728411
MDM2	0.463668	0.536711	-0.211041	0.211009
MDM4	0.264931	0.583412	-1.13885	1.1386
MDN1	0.0218506	0.018521	0.238512	-0.237332
MED11	0.0341176	0.0641483	-0.910889	0.908918
MED13L	3.72735	1.55576	1.26021	-1.26047
MED15	0.358427	0.198072	0.85563	-0.855328
MED20	0.0294652	0.0810294	-1.45942	1.45632
MED25	0.243088	0.500909	-1.04303	1.04276
MED26	0.324118	0.324118	0	0
MED29	0.162059	0.219741	-0.439276	0.439051
MED9	0.0841863	0.147326	-0.807347	0.806623
MEGF8	0.561804	0.216078	1.37846	-1.3781
MEIS1	1.11126	1.11126	-1.17677e-07	1.17679e-07
MEIS2	0.567206	0.648235	-0.192634	0.192614
MELTF	0.486176	0.30251	0.684471	-0.684318
MELTF-AS1	1.94471	1.62059	0.262987	-0.263019
MEPCE	0.259625	0.2327	0.157955	-0.157894
METAP2	0.281259	0.39875	-0.503569	0.503435
METTL13	0.0365426	0.0676556	-0.888624	0.886817
METTL21A	0.667878	0.362367	0.882088	-0.88195
METTL22	0.283603	0.10197	1.47571	-1.47483
METTL25	0.252092	0.235722	0.0968594	-0.096822
METTL8	1.00647	0.864314	0.219659	-0.219656
METTL9	0.044016	0.109561	-1.31563	1.31368
MFF	0.223529	0.280902	-0.329594	0.329471
MFF-DT	0.0388941	0.0216078	0.847995	-0.845041
MFSD11	4.19447	8.21316	-0.968871	0.969433
MGA	0.498643	0.648235	-0.37849	0.378444
MGARP	0.0836431	0.181125	-1.11465	1.11374
MGAT2	0.396878	0.788525	-0.990403	0.990279
MGLL	0.46817	0.324118	0.530495	-0.530379
MGME1	0.248405	0.327236	-0.397624	0.397496
MGRN1	0.0869583	0.108039	-0.313156	0.312836
MGST1	0.0879625	0.20562	-1.225	1.22408
MHENCR	6.43606	5.26691	0.289052	-0.289215
MIA2-AS1	0.0972353	0.223281	-1.19929	1.19847
MIA3	0.284103	0.306392	-0.108962	0.108929
MIATNB	0.262381	0.252091	0.0577152	-0.0576943
MIB1	0.972353	0.972353	3.1225e-16	-1.59595e-16
MIB2	0.648235	0.810294	-0.321904	0.321883
MICAL2	0.388941	0.810295	-1.05883	1.0587
MICU3	0.243088	0.162059	0.58495	-0.584665
MIEN1	1.18843	1.29647	-0.125516	0.125521
MINDY1	0.0409804	0.0571972	-0.48101	0.480016
MINDY4	0.567206	0.486176	0.222381	-0.22235
MINK1	0.601933	1.64877	-1.45357	1.45357
MIOS	0.557482	0.523575	0.0905264	-0.0905146
MIR17HG	4.33701	3.29754	0.395157	-0.395297
MIR181A1HG	5.39475	4.90498	0.137239	-0.137307
MIR1908	0.648235	0.756274	-0.222377	0.222361
MIR2861	0.213918	0.553701	-1.372	1.37164
MIR3175	0.601933	0.881195	-0.549819	0.549783
MIR34AHG	1.62059	0.648235	1.32179	-1.3218
MIR3610	0.0945342	0.224389	-1.24708	1.24621
MIR3655	0.049491	0.039769	0.315518	-0.314809
MIR3677HG	0.453765	0.486176	-0.0995312	0.0995147
MIR3960	1.94471	2.18779	-0.169889	0.169916
MIR4435-2HG	0.180065	0.138907	0.374392	-0.37416
MIR4519	0.0540196	0.0249321	1.11547	-1.11237
MIR4638	1.29647	0.756275	0.77753	-0.777528
MIR5703	0.318431	0.398505	-0.323605	0.323525
MIR639	0.0407268	0.0864313	-1.08557	1.08371
MIR658	0.648235	0.324118	0.999953	-0.999777
MIR6875	0.523574	0.2204	1.24823	-1.24789
MIR762	0.567206	1.29647	-1.19254	1.1925
MIR762HG	0.138908	0.165828	-0.255556	0.255391
MIRLET7IHG	0.350685	0.981886	-1.48529	1.48512
MIS12	0.514608	0.544698	-0.0819781	0.0819669
MKI67	0.324118	0.149593	1.11545	-1.11496
MKLN1	0.307059	0.238824	0.36256	-0.362435
MKLN1-AS	0.410549	0.201846	1.02427	-1.02394
MKRN2	1.94471	2.65776	-0.450558	0.450641
MLF2	16.2059	8.21098	0.97974	-0.980883
MLST8	3.0386	2.16079	0.491725	-0.491832
MLX	0.972355	0.948044	0.0365247	-0.0365245
MLXIPL	0.432157	0.729264	-0.754844	0.754751
MMD	0.972353	2.59294	-1.4148	1.41494
MMP14	0.172863	0.295934	-0.775628	0.775299
MNX1	1.29647	2.91706	-1.16969	1.16986
MNX1-AS1	0.486176	0.567206	-0.22238	0.22235
MOB1B	0.129647	0.129647	7.61751e-07	-7.61174e-07
MOCS3	0.993265	2.63924	-1.40964	1.40978
MON1B	0.550609	0.788051	-0.517226	0.517181
MON2	0.0823155	0.0945343	-0.199671	0.199447
MORF4L1	0.249832	0.616392	-1.30284	1.30255
MOV10	0.137338	0.0755226	0.862741	-0.861891
MPC1	0.0199457	0.0563683	-1.4988	1.49415
MPC2	1.32888	0.859904	0.627899	-0.627908
MPDU1	0.0723584	0.165206	-1.19102	1.18991
MPDU1-AS1	0.0139029	0.0207563	-0.578162	0.574757
MPHOSPH10	6.37432	3.72735	0.773737	-0.774102
MPST	0.324118	0.787143	-1.28004	1.27985
MPZL3	0.486176	0.432157	0.169916	-0.169887
MRAS	0.756275	1.62059	-1.09941	1.09943
MRFAP1	1.41403	1.72045	-0.282929	0.282955
MRFAP1L1	0.0810294	0.108039	-0.415034	0.414594
MRI1	2.13343	1.42612	0.580981	-0.581049
MRNIP	0.162059	0.432157	-1.415	1.41448
MRNIP-DT	0.432157	0.324118	0.415022	-0.414926
MROH1	1.58007	2.37686	-0.588952	0.589036
MROH8	0.494706	0.631176	-0.351451	0.351408
MRPL12	4.38022	1.75772	1.31692	-1.31725
MRPL18	0.253344	0.297926	-0.233854	0.233775
MRPL19	3.95424	2.05275	0.945571	-0.945811
MRPL20-AS1	4.60699	5.99618	-0.38002	0.380213
MRPL30	0.108039	0.0558823	0.951084	-0.949847
MRPL32	0.0145671	0.0217691	-0.57957	0.576314
MRPL37	0.171581	0.0675245	1.3454	-1.34412
MRPL38	0.594216	0.864314	-0.54053	0.540493
MRPL4	0.836432	0.891323	-0.0916926	0.0916899
MRPL42	0.151255	0.294107	-0.959338	0.958895
MRPL43	0.93634	1.03128	-0.139323	0.139322
MRPL50	1.102	2.26882	-1.04165	1.04175
MRPL52	0.269182	0.284314	-0.0788975	0.0788711
MRPL57	0.254059	0.183358	0.470491	-0.470282
MRPS11	0.303207	0.471444	-0.636757	0.636612
MRPS12	0.606904	0.407031	0.5763	-0.576212
MRPS16	0.0170588	0.0180065	-0.0780035	0.0775611
MRPS17	1.49499	1.17365	0.349093	-0.349113
MRPS18C	0.0280628	0.0296191	-0.0778673	0.0775983
MRPS21	0.240927	0.349739	-0.537664	0.537493
MRPS25	0.0432157	0.0810294	-0.906885	0.905335
MRPS26	1.28694	1.46558	-0.187499	0.187511
MRPS30	0.0967514	0.1521	-0.652656	0.652121
MRPS35	0.0980523	0.0980882	-0.000528265	0.000527732
MRPS35-DT	0.64955	0.571471	0.184749	-0.18473
MRPS7	0.537898	1.28634	-1.25776	1.25771
MRPS9	0.0571972	0.10569	-0.885822	0.884673
MRPS9-AS2	3.80838	1.36129	1.48385	-1.48413
MRS2	0.0883957	0.0443997	0.993422	-0.991814
MRTFB	0.353583	0.648236	-0.874426	0.874283
MRTO4	0.0707165	0.197289	-1.48017	1.47888
MSANTD2	0.324118	0.324118	2.22045e-16	-2.22045e-16
MSH2	0.126608	0.243088	-0.94109	0.940561
MSH3	1.04059	2.755	-1.40441	1.40457
MSL2	0.270098	0.0972353	1.47391	-1.47298
MSMO1	0.237108	0.637431	-1.42667	1.42634
MSRB1	3.56529	4.05147	-0.184355	0.184421
MTA2	0.648235	0.405147	0.678037	-0.677939
MTAP	0.169425	0.108039	0.649084	-0.648609
MTARC2	0.0498643	0.0347269	0.521952	-0.520696
MTCH1	0.0540196	0.0405147	0.415037	-0.41415
MTCL1	0.564205	1.29647	-1.20019	1.20015
MTDH	0.316056	0.415687	-0.395304	0.395209
MTF2	0.127185	0.106768	0.252447	-0.252233
MTG1	0.213235	0.255882	-0.263029	0.262922
MTG2	2.51191	1.06959	1.23152	-1.23165
MTHFD2	0.0850408	0.096175	-0.177506	0.177311
MTHFD2L	0.152237	0.30386	-0.997067	0.996616
MTHFR	0.648235	0.405147	0.678037	-0.677938
MTHFS	0.0617367	0.0540196	0.192644	-0.192312
MTIF3	0.110495	0.144052	-0.38261	0.382311
MTMR10	0.0648235	0.0405147	0.678069	-0.67674
MTMR3	0.0664856	0.0883957	-0.410932	0.410398
MTMR4	0.216078	0.0810294	1.41502	-1.41393
MTRES1	0.129647	0.324118	-1.3219	1.32126
MTRFR	0.0949999	0.0869584	0.127599	-0.12746
MTRR	0.62917	0.448778	0.48742	-0.487354
MTX1	0.236518	0.381837	-0.690986	0.690774
MUTYH	0.0264586	0.019447	0.444182	-0.442226
MVK	0.567206	0.324118	0.80732	-0.807165
MYADM	0.412864	1.06228	-1.36333	1.36321
MYBL2	0.0383048	0.0429295	-0.164443	0.164039
MYC	0.583791	0.808134	-0.46911	0.469074
MYCBP2-AS1	3.24118	1.29647	1.32165	-1.32186
MYDGF	0.756275	0.324118	1.22233	-1.22214
MYH10	1.29647	0.648235	0.999906	-0.999889
MYL12-AS1	1.13441	1.45853	-0.362525	0.362543
MYL12A	0.207932	0.427961	-1.04133	1.04101
MYLK-AS1	0.105119	0.131908	-0.327505	0.32723
MYLK4	0.548507	0.242537	1.17726	-1.17697
MYNN	0.240773	0.564592	-1.22949	1.22919
MYO18A	24.633	9.72354	1.33889	-1.34103
MYO1C	1.06959	0.777882	0.45939	-0.459382
MYO1D-DT	0.972353	1.08039	-0.151988	0.151989
MYO6	0.216078	0.116682	0.888955	-0.888401
MYO9B	1.94471	0.972353	0.99986	-0.999926
MYOSLID	1.47654	2.45403	-0.732797	0.732899
MYRF	0.0915984	0.156831	-0.775807	0.775162
MYSM1	2.26882	0.972353	1.22221	-1.22231
MZF1	0.583412	0.648235	-0.151994	0.151978
MZF1-AS1	0.132048	0.367333	-1.47599	1.47533
MZT2A	0.216078	0.194471	0.152	-0.151929
NAA16	0.144052	0.263345	-0.870347	0.86991
NAA20	1.34277	2.80267	-1.06137	1.06153
NAA35	1.67461	0.939941	0.833075	-0.833114
NAA38	0.674983	1.38832	-1.04031	1.04031
NABP1	0.0762629	0.131814	-0.789441	0.788652
NACC2	0.324118	0.810294	-1.32186	1.32166
NAIF1	0.324118	0.648235	-0.999953	0.999777
NANOS3	0.37042	0.648235	-0.807315	0.807188
NAPA	0.324118	0.324118	0	0
NAPA-AS1	0.0810294	0.0720261	0.169924	-0.169703
NAPB	0.972352	0.648235	0.584915	-0.584888
NAPSB	0.55563	0.315358	0.817102	-0.816939
NAT10	0.829419	0.406321	1.02942	-1.0293
NAXE	1.9703	0.872031	1.1758	-1.17587
NBR2	0.0944531	0.0952645	-0.0123407	0.0123278
NCBP1	0.194471	0.383048	-0.977946	0.977608
NCBP2	0.4518	0.89609	-0.987895	0.987801
NCBP2-AS1	1.48168	1.33248	0.153095	-0.153105
NCBP2AS2	0.559364	0.536041	0.061443	-0.0614352
NCBP3	1.13441	0.648235	0.807284	-0.807259
NCKAP1	0.432157	0.486176	-0.169918	0.169889
NCOA2	0.350685	0.31658	0.1476	-0.14756
NCOA6	0.0486177	0.0648235	-0.415034	0.414296
NCOA7	2.59294	2.83603	-0.129248	0.129278
NCSTN	0.21378	0.491087	-1.19981	1.19947
NDE1	0.324118	0.216078	0.584947	-0.58474
NDEL1	0.81801	0.810294	0.0136723	-0.0136717
NDFIP1	0.592448	0.853476	-0.526624	0.526587
NDRG2	0.486176	0.324118	0.584939	-0.584814
NDST1	1.15009	1.21544	-0.0797188	0.0797215
NDUFA13	0.0204168	0.0203634	0.00378143	-0.00376299
NDUFA9	0.0237884	0.010903	1.12553	-1.11841
NDUFAF1	0.324118	0.344375	-0.0874596	0.0874364
NDUFAF3	0.80497	2.204	-1.45292	1.453
NDUFAF6	1.62059	2.59294	-0.677931	0.678038
NDUFB1	0.0447059	0.108039	-1.27301	1.27113
NDUFB2-AS1	0.409198	0.189069	1.11386	-1.11348
NDUFB4	0.042613	0.0764428	-0.843081	0.84159
NDUFB5	0.0721668	0.148168	-1.03782	1.0368
NDUFC1	4.39874	1.59112	1.46664	-1.46699
NDUFC2	0.324118	0.162059	0.999978	-0.999556
NDUFC2-KCTD14	0.324118	0.180065	0.847977	-0.847642
NDUFS3	2.0569	1.75771	0.226728	-0.22676
NDUFS5	0.0496984	0.0888643	-0.838401	0.837129
NDUFV1	1.56319	0.995098	0.651503	-0.651532
NDUFV2-AS1	1.00322	1.28659	-0.35887	0.35888
NDUFV3	0.102353	0.18521	-0.855598	0.85498
NECAB3	0.162059	0.324118	-0.999977	0.999555
NEDD4L	0.734667	1.44052	-0.971329	0.971334
NEK2-DT	0.324118	0.162059	0.999977	-0.999555
NEK6	2.83815	1.06496	1.4139	-1.41407
NEK8	0.110022	0.0786693	0.483908	-0.48339
NEK9	0.0341176	0.0170588	0.999997	-0.99579
NELFB	1.55577	2.52812	-0.7003	0.700404
NENF	0.0589305	0.0324117	0.862493	-0.860498
NEPRO	0.972353	0.486176	0.999931	-0.999852
NEPRO-AS1	0.324118	0.216078	0.584947	-0.58474
NETO2	1.29647	0.648235	0.999906	-0.999889
NEURL1B	21.7159	8.10296	1.42027	-1.42222
NEXN-AS1	0.324118	0.324117	9.69333e-07	-9.69065e-07
NFAT5	0.103222	0.144052	-0.480834	0.480444
NFATC2IP	0.17595	0.41138	-1.22528	1.22484
NFATC4	0.648235	0.324118	0.999953	-0.999777
NFE2L3	0.157557	0.076263	1.04681	-1.04584
NFIB	0.756275	0.810295	-0.0995282	0.0995232
NFIC	1.14394	0.405147	1.49739	-1.49727
NFIL3	0.567206	0.540196	0.0703863	-0.0703775
NFIX	2.99809	3.24118	-0.11244	0.112471
NFKB1	1.04415	1.62059	-0.634109	0.634143
NFKBIZ	0.138908	0.162059	-0.222388	0.222243
NFX1	0.37042	0.489293	-0.40152	0.401443
NFXL1	2.91706	1.51255	0.94733	-0.947486
NFYC	0.388942	0.276801	0.490687	-0.490553
NFYC-AS1	0.648235	1.51255	-1.22227	1.22227
NHERF1	0.283783	0.145593	0.962827	-0.962365
NHERF2	0.0648235	0.162059	-1.32191	1.32059
NHLRC3	1.32859	1.16682	0.187286	-0.187294
NHSL3	7.13059	2.91706	1.2889	-1.28948
NIF3L1	0.308655	0.266462	0.212059	-0.211991
NIFK-AS1	0.018864	0.0208361	-0.143453	0.142733
NINJ2	0.648235	0.324118	0.999954	-0.999778
NINL	0.216078	0.121544	0.830062	-0.829556
NIP7	0.766494	0.632552	0.277071	-0.277051
NIPAL2	1.94471	1.29647	0.584869	-0.584925
NIPBL	0.367918	0.193766	0.925042	-0.924715
NIPSNAP1	6.15824	11.9924	-0.960685	0.961515
NIPSNAP2	1.29647	0.891324	0.54051	-0.540517
NIPSNAP3A	0.0810294	0.162059	-0.999987	0.99911
NIT1	0.942887	0.480174	0.97346	-0.973379
NKAIN2	0.0360131	0.0405147	-0.169923	0.169479
NKAPD1	0.310025	0.702255	-1.17955	1.17935
NME1-NME2	0.101425	0.18178	-0.841777	0.84116
NME4	1.0984	0.864314	0.345741	-0.34574
NNT	0.252091	0.277815	-0.140174	0.140125
NOL11	0.512558	0.440519	0.2185	-0.218464
NOMO2	0.0324118	0.0648235	-0.999994	0.997778
NOP53	0.284698	0.583412	-1.03504	1.03482
NOP56	3.79473	7.85329	-1.04872	1.04928
NOP9	0.698654	0.517209	0.433804	-0.433757
NOS1AP	0.504183	0.918334	-0.865011	0.864941
NOSTRIN	0.0705998	0.110999	-0.652807	0.65207
NOXA1	1.70162	1.62059	0.0703777	-0.0703851
NPAS2	0.788135	0.854886	-0.11728	0.117276
NPEPPS	0.131026	0.277815	-1.08425	1.08369
NPHP3-ACAD11	1.52798	0.991419	0.623985	-0.624011
NPM1	0.125416	0.323556	-1.36726	1.36659
NPPA-AS1	2.23936	2.4849	-0.150069	0.150098
[truncated: 1,599 more rows]
