# Supplementary material for: Phase separation of NELFE modulates chromatin accessibility to promote dichotomous signaling pathways in hepatocellular carcinoma
Source: Research Square preprint supplement (doi:10.21203/rs.3.rs-5843408/v1), 2025-04-25
Supplement: Supplementary file 3 [file 67890afc23c9399681f7a4c0.docx]

**Supplemental Material and Methods**

**CRISPR/Cas9 Cell Models**

NELFE knockout cell lines were generated using sgRNA (HD90) F’AAATTAGCCAAGCATGGTAGA and R’ CCAAGGACTCAGGCAATCAAC and cloned into lenti-CRISPRv2 (RRID: Addgene_52961) plasmid at the U6 promoter and packaged using HEK293T cells with the GeneCopoeia Lenti-Pac HIV Expression packaging kit (LT002). Hep3B, Huh1 and HLE cell lines were transduced with lenti-CRISPRv2-sgNELFE and lenti-CRISPRv2-sgCtrl virus supplemented with 10 mg/ml polybrene and incubated overnight. The media was changed the day after. Cells were selected 72 hours later using 2 ug/ml puromycin and the media was changed followed by adding fresh puromycin every 3 days. Once the cells reached 70-80% of confluency, single clones were selected, cultured, and verified via Western blot and Sanger sequencing. sgCtrls were not selected and they were used as a pooled cell population.

To generate the eNELFE.eGFP knock-in cell lines in Hep3B and HLE cells, we used homology directed repair (HDR) and generated a donor plasmid using the pCRIS-PITChv2-FBL donor vector (RRID:Addgene_63672)) and removed the FBL locus and replaced it with PCR amplified human NELFE 800bp homology arms that were complementary to the NELFE locus surrounding the stop codon (800bp upstream and 800bp downstream of the stop codon). We used the px330A-1x2 vector (RRID: Addgene_58766) to clone in sgRNA5 (TGGCTTCTAGGGAACAGAGC) and sgRNA6 (AACCTTGTGGATGGCTTCTA) downstream of the U6 promoter. Hep3B and HLE cells were electroporated using the Neon™ Transfection System (Thermo, MPK5000) with the 100uL kit (Thermo, MPK10025). Briefly, 5x105 (Hep3B) -1x106 (HLE) cells were transfected in a 6-well plate with 4ug DNA (2ug donor + 1ug sgRNA5 +1ug sgRNA6) and for Hep3B and 5ug DNA (2.5ug sgRNA5 + 2ug donor) for HLE; 1,275V, 40 pulse width, and 1 pulse. The media was changed the next day, and puromycin selection (2ug/mL) began 48 hours post transfection for 1 week. Surviving cells were single cell cloned and validated with PCR using NELFE guide test TAG F (ATGGGTTGGCACAAAGGAGCT) and NELFE guide test TAG R (ACGCCCGAGACTTTCACATCA), Sanger sequencing using primers NELFE TAG F, NELFE Tag R, Puro-F Seq (GCAACCTCCCCTTCTACGAGC), pCRIS eGFP-N R (CGTCGCCGTCCAGCTCGACCAG) and western blot. For Hep3B cells, sgRNA5+sgRNA6 had the best cutting efficiency and sgRNA5 worked the best for HLE cells. Once both cell lines were validated, we performed TA cloning to confirm the number of NELFE alleles that were successfully tagged with GFP. The Hep3B.eNELFE+eGFP knockin cell line has 2 of the 3 alleles tagged and it’s a heterozygous knockin model. The HLE eNELFE-eGFP knockin cell line has all 3 alleles tagged and is a homozygous knockin model.

To generate eNE∆LCS1m-eGFP mutant cells, sgRNAs (∆LCS1left) F’caccgAGTGATCGACTTCGAGAACT and R’aaacAGTTCTCGAAGTCGATCACTc, and sgRNAs (∆LCS1right) F’ caccgCCCCTCGAAGCTTTGACTGG and R’ aaacCCAGTCAAAGCTTCGAGGGGC were cloned together into pSpCas9(BB)-2A-Blast (RRID: Addgene_62988) downstream of the U6 promoter. Hep3B and HLE eNELFE.eGFP were transfect with the plasmid using Fugene in 3:1 ratio. After 48 hours of transfection, cells were selected with 2ug/mL puromycin, and surviving cells were single cell cloned and validated by western blot using NELFE antibody from ProteinTech (10705-1-AP) and with Sanger sequencing using NELFE ∆LCS1 Test Forward F’(CCATTTGGTGGAGTTGATTGC) and NELFE ∆LCS1 Test Reverse R’(CTCTCTGTCTCTGTCTCGA).

The endogenous eNELFE.mAID (mini auxin inducible degron) knock-in cell lines were made using Hep3B and HLE cells by first generating a lentiviral plasmid expressing OsTIR1F74G that was isolated from the pMK381 plasmid (RRID: Addgene_140536) and cloned into the lentiCRISPRv2 vector replacing the Cas9 gene. This plasmid was then packaged using HEK293T cells with the GeneCopoeia Lenti-Pac HIV Expression packaging kit. To generate the OsTIR1 cell lines, 1x10^5 Hep3B or HLE cells were reverse transduced with 50uL of lentiOsTIR1 virus and 8ug/mL polybrene in a 6-well plate. Two days post transduction, cells were selected with Blasticidin (5ug/mL Hep3B, 20ug/mL HLE) for 1 week and OsTIR1 protein expression was validated via western blot. The NELFE+mAID-Hygro donor plasmid was generated using InFusion (Takara, 638947) PCR and restriction enzyme cloning. Three separate PCR reactions were performed; one to amplify NELFE 800bp upstream of the stop codon, second to amplify NELFE 800bp downstream of the stop codon, and third to amplify the mAID+Hygro fragment from the pMK287 plasmid (RRID: Addgene_72825). Next, all three fragments were combined using overlap extension PCR to generate the NELFE800+mAID-Hygro+NELFE800 fragment with EcoRV restriction sites on the 5’ and 3’ end of the fragment. Next, the donor vector pBluescript II KS(-) (Agilent, 212208) and overlap PCR fragment were digested with EcoRV at 37C for 2 hours, followed by T4 PNK incubation of the PCR fragment and phosphorylation of the donor with CIP for 1 hour at 37C in a thermocycler. The linear donor and PCR fragment were ligated using T4 ligase at 16C overnight in a thermocycler and heat-inactivated at 65C for 10min the next day. Plasmids were transformed into E.coli, single colonies were inoculated, mini-prepped, and sent for Sanger Sequencing to confirm successful InFusion. The mAID knockin cell lines were generated using Fugene™ HD transfection system. Briefly, 4x104 cells Hep3B.lentiOsTIR1 cells were then transfected with 1.5ug plasmid DNA (500ng px330A.sgRNA5 + 1ug donor) with Fugene™ HD at a 3:1 ratio in a 6-well plate. 48 hours after transfection, cells were selected with 100ug/mL Hygromycin for 1 week and validated via PCR, Sanger sequencing and western blot. PCR primers used were NELFE guide test TAG F NELFE guide test TAG R.

SMARCB1 knockout cell lines were generated using sgRNA (SMARCB1 1-1b) F’ caccgGAAGCCCGTGAAGTTCCAGC and R’ aaacGCTGGAACTTCACGGGCTTCc and sgRNA (SMARCB1 1-2b) F’ caccgATGGCGCTGAGCAAGACCTT and R’ aaacAAGGTCTTGCTCAGCGCCATc cloned into lenti-CRISPRv2 plasmid at the U6 promoter and packaged using HEK293T cells with the GeneCopoeia Lenti-Pac HIV Expression packaging kit (LT002). Hep3B and HLE cell lines were transduced with lenti-CRISPRv2-sg1-1b, lenti-CRISPRv2-sg1-2b and lenti-CRISPRv2-sgCtrl virus supplemented with 10 mg/ml polybrene and incubated overnight. The media was changed the day after. Cells were selected 72 hours later using 2 ug/ml puromycin for Hep3B and 3 ug/ml for HLE and the media was changed followed by adding fresh puromycin every 3 days. Once the cells reached 70-80%, SMARCB1 knockdown was verified via Western blot and Sanger sequencing. sgCtrls were not selected and they were used as a pooled cell population.

**Plasmid Details**

pLKO.1 shNELFE, pLKO.1 shNELFA and pLKO shCtrl were purchased from Origene Technologies and packaged using HEK293T cells. An MOI of 0.5 was used for transduction of 1 x 105 HCC cells.

NELFE full-length (FL) mGFP overexpression plasmid was purchased from Origene (RC208658L2). NELFE∆LCS1-mGFP, ∆LCS2-mGFP and DRRM-mGFP were cloned using InFusion cloning kit (Takara) with the NELFE FL plasmid as a template. The cloning primers for NELFE ∆LCS1, ∆LCS2, were as follows: AGATCTGCCGCCGCGATCGCATGTTGGTGATACCCCCCGGA (F) and GCGGCCGCGTACGCGTGAAGCCATCCACAAGGTTTTCCTTG (R), and for the DRRM the reverse primer was GCGGCCGCGTACGCGTattccctttcctaggggctcg (R). Briefly, full length NELFE-mGFP was used as a PCR template with the above primers and gel purified using the Monarch gel extraction kit (New England Biolabs, T1020L). The purified product (2uL) was used for the InFusion reaction for 15min at 50C. InFusion products were then used for bacterial transformation using 25uL of NEB Stbl3 competent cells (New England Biolabs, C3040H) and plated onto LB+Chloramphenicol 34ug/mL agarose plates and grown at 37C overnight. Next day, single clones were inoculated and grown at 37C overnight. DNA was isolated using the Monarch plasmid miniprep kit (New England Biolabs, T1010S) and sent for sequencing to confirm successful cloning using the pLenti-3-seqR reverse primer GATGCCGTAGCAGAGGGTGGT (R).

For in vitro phase separation assays, plasmids were cloned using the pJ4M (Addgene RRID: Addgene_139109) and pTHMT (Addgene RRID: Addgene_98662) backbones. The following plasmids were generated: pJ4M.NELFE, pJ4M.NELFE-mGFP, pJ4M.NELFEΔLCS1, pJ4M.NELFE∆LCS1-mGFP, pJ4M.NELFE∆LCS2, pJ4MNELFE∆LCS2-mGFP, pJ4M.NELFEDRRM and pJ4M.NELFEDRRM-mGFP were generated by digesting the pJ4M plasmid with NdeI and XhoI restriction enzymes at 37C for 1 hour. Each fragment to be cloned was amplified with PCR and the template was pLenti-c-NELFE-mGFP overexpression plasmids (Origene) with either NELFE, NELFEDLCS1, NELFEΔLCS2, or NELFEDRRM coding sequences. PCR primers for amplifying NELFE FL+mGFP, DLCS1+mGFP, DLCS2+mGFP and DRRM+mGFP were as follows: GGAGATATACCCATATGATGTTGGTGATACCCCCCGG (F), and ACAGGTTCTCCTCGAGTCTGAGTCCGGACCTGTACAG (R). For NELFE FL, DLCS1 and DLCS2 the reverse primer was ACAGGTTCTCCTCGAGGAAGCCATCCACAAGGTTTTCC (R), and for DRRM the reverse primer was ACAGGTTCTCCTCGAGattccctttcctaggggctcg with 15bp at each end for InFusion into the digested pJ4M backbone. The digested plasmid and amplified PCR products were gel purified using the Monarch Gel Extraction Kit (New England Biolabs, T1020L) and used for the InFusion reaction (2uL) for 15min at 50C. InFusion products were then used for bacterial transformation using 25uL of NEB Stbl3 competent cells (New England Biolabs, C3040H) and plated onto LB+Kanamycin 30ug/mL agarose plates and grown at 37C overnight. Next day, single clones were inoculated and grown at 37C overnight. DNA was isolated using the NEB mini prep kit (New England Biolabs, T1010S) and sent for sequencing to confirm successful plasmid generation using universal T7 forward primer and MBPR reverse primer.

To make pJ4M plasmids with NELFE D145-166 (NELFE∆LCS1m), we used InFusion site directed mutagenesis. The NELFE∆145-166 fragment was PCR amplified using pLenti-c-NELFE.eGFP as a template and the following primers: CTGGGGCTATGAAGAACGCAG (F) and TCTTCATAGCCCCAGTCTCGAAGTCGATCACTAGAA (R). The PCR product was gel purified using the Monarch gel extraction kit (New England Biolabs, T1020L) and the purified product (2uL) was used for the InFusion reaction for 15min at 50C. InFusion products were then used for bacterial transformation using 25uL of NEB Stbl3 competent cells (New England Biolabs, C3040H) and plated onto LB+Kanamycin 30ug/mL agarose plates and grown at 37C overnight. Next day, single clones were inoculated and grown at 37C overnight. DNA was isolated using the Monarch plasmid miniprep kit (New Englad Biolabs, T1010S) and sent for sequencing to confirm successful cloning using the universal T7 forward primer.

To make pTHMT.SMARCB1, the pTHMT plasmid was digested with NdeI and XhoI restriction enzymes at 37C for 1 hour. The SMARCB1 fragment to be cloned was amplified with PCR and the template was pLenti-SMARCB1-mGFP overexpression plasmid (Origene) using the PCR primers ACTTCCAGGGTCATATGATGATGATGG (F) and GGTGGTGGTGCTCGAGCCAGGCCGGGGCCGTGTTGG (R) with 15bp at each end for InFusion into the digested pTHMT backbone. The digested plasmid and amplified PCR product were gel purified using the Monarch Gel Extraction Kit (New England Biolabs, T1020L) and used for the InFusion reaction (2uL) for 15min at 50C. The InFusion product was then used for bacterial transformation using 25uL of NEB Stbl3 competent cells (New England Biolabs, C3040H) and plated onto an LB+Kanamycin 30ug/mL agarose plate and grown at 37C overnight. Next day, single clones were inoculated and grown at 37C overnight. DNA was isolated using the NEB mini prep kit (New England Biolabs, T1010S) and sent for sequencing to confirm successful plasmid generation using the MBP forward primers TATGCCGTGCGTACTGCGGTGATC and CTAATTCGGGATCTGATATCACAA and F1ori R reverse primer AGGGAAGAAAGCGAAAGGAG.

**Immunoblotting**

Protein lysates (10-40ug) were prepared using RIPA Buffer (Cell Signaling Technologies, 9806) emented with protease inhibitors (Roche, 11836153001). Protein concentration was determined using the Pierce Rapid Gold BCA Protein Assay Kit (Thermo A53225). Samples were prepared using NuPage Sample Reducing Agent (Thermo NP0009), and NuPage LDS Sample Buffer (Thermo, NP0007) and boiled at 70C for 10 minutes. Equal amounts of protein were separated on a Bis-Tris 4-12% polyacrylamide gel (Thermo, NP0336BOX) and transferred to a nitrocellulose membrane using the iBlot dry transfer system (Thermo, IB31001). Membranes were blocked in 5% milk in 1XPBST followed by primary antibody incubation at 4C overnight using anti-NELFE (Abcam, ab170104), anti-WSHC2 (Santa Cruz, sc-365004 clone G-11), anti-TH1L (Cell Signaling Technologies, 12265S), anti-COBRA1 (Cell Signaling Technologies, 14894S), anti-GAPDH (Cell Signaling Technologies,5174S). After washing in 1XPBST, membranes were incubated with HRP-conjugated secondary antibodies and imaged using the ChemiDoc Imaging System (Bio-Rad).

**In vitro expression and purification of SMARCB1, NELFE full length protein, ∆LCS1, ∆LCS2 and ∆RRM domains**

C-terminally MBP tagged (pJ4M) NELFE full-length (NELFE-mGFP), ∆LCS1 (-mGFP), ∆LCS2 (-mGFP) and ∆RRM domains and SMARCB1 were expressed in E. coli BL21 star (DE3) cells (C600003; Thermo). Bacterial cultures were grown to an optical density at 600 nm of 0.7-0.9 before induction with 1 mM isopropyl-â-D-1-thiogalactopyranoside (IPTG) for 4 hours at 37° C. Cell pellets were harvested by centrifugation and stored at -80°C. Cells were resuspended in ~40 mL of 20 mM Tris, 1 M NaCl, 10 mM Imidazole, 1 mM DTT pH 8.0, with one Roche EDTA-free protease inhibitor tablet (11697498001; Sigma Aldrich) for ~4 g cell pellet, and lysed using the Avestin Emulsiflex C3 (Ottawa, Ontario, Canada). The lysate was cleared by centrifugation at 47,850 x g (20,000 rpm) for 50 min at 4°C, filtered using a 0.2 µm syringe filter, and loaded onto a HisTrap HP 5 ml column (17524701; Cytiva, Marlborough, MA, USA). The protein was eluted with a gradient from 10 to 500 mM imidazole in 20 mM Tris, 1 M NaCl, 1 mM DTT pH 8.0. Fractions containing MBP-tagged NELFE full length were loaded onto a HiLoad 26/600 Superdex 200 pg column (28-9893-36; Cytiva) equilibrated in 20 mM Tris, 300 mM NaCl, and 1 mM dithiothreitol (DTT). Fractions containing MBP-tagged ∆LCS1, ∆LCS2, or ∆RRM were loaded onto a HiLoad 26/600 Superdex 200 pg (28-9893-36; Cytiva) equilibrated in 20 mM Tris, 300 mM NaCl and 1 mM DTT. Fractions with high purity were identified by SDS-PAGE and concentrated using a centrifugation filter with a 10 kDa cutoff (ACS501024; MilliporeSigma, Burlington, MA, USA). MBP-tagged NELFE full length, ∆LCS1, ∆LCS2 and ∆RRM domains were flash frozen in liquid nitrogen in 20 mM Tris, 300 mM NaCl and 1 mM DTT and stored at -80 °C.

**Differential interference contrast microscopy**

Droplets were prepared in the purification buffer at 50 µM protein concentration for MBP-tagged NELFE full length, ∆LCS1, ∆LCS2 and ∆RRM domains in 20 mM NaPi, pH 7.4, 150 mM NaCl, in the absence and presence of 0.5 mg/mL Polyadenylic acid (Poly A) potassium salt. The samples were incubated with 0.03 mg ml-1 TEV protease for ~20 minutes before visualization. Samples were spotted onto a glass coverslip and droplet formation was evaluated by imaging with differential interference contrast (DIC) on a Ti2-E Fluorescence microscope (Nikon).

For co-phase separation studies, purified SMARCB1 was labeled with alexa-fluor 647. Droplets were prepared in purification buffer at 1 uM NELFE-FL-mGFP, 0.20 uM SMARCB1-alexa-flour-647, +/- 0.175 mg/mL Poly A RNA in 20mM NaPi pH 7.4, 150 mM NaCl. The samples were incubated with 0.03 mg ml-1 TEV protease for ~20 minutes before visualization. Samples were spotted onto a glass coverslip and droplet formation was evaluated by imaging with on a Ti2-E Fluorescence microscope (Nikon).

**Turbidity Measurements**

Turbidity was used to evaluate phase separation of 50 µM NELFE full length in the presence of 0.06 mg mL-1 TEV protease (~0.3 mg mL-1 in 50 mM Tris-HCl pH 7.5, 1 mM EDTA, 5 mM dithiothreitol, 50% glycerol and 0.1% Triton X-100). The experiment was performed in 20 mM NaPi pH 7.4 and 150 mM NaCl with the indicated poly adenylic Poly(A) potassium salt concentrations. Turbidity experiments were performed in a 96-well clear plate with 100 µL samples sealed with optical adhesive film to prevent evaporation (4311971; Thermo). The absorbance at 600 nm (A600) was monitored over time using a Biotek Syngery H1 Plate Reader (BioTek Instruments, Winooski, Vt, USA) at 5 min time intervals for up to three hours.

**Confocal Microscopy**

Live cell imaging and z-stacks were conducted using a Nikon A1R confocal microscope with a Plan Apo VC 60x/1.4 oil immersion objective (Nikon, MRD01602). Z-stacks and movies were taken using the Galvano scanner FRAP using the resonant scanner. For live cell imaging, the Nikon A1R was equipped with a CO2 y and heated, humidified incubation chamber.

**1,6 Hexanediol Treatment**

HCC cells (3.0x10^4) were seeded onto a 35mm glass bottom dish (Thermo, 150682) and incubated for 24-72 hours. To prepare for treatment, 30% 1,6-hexanediol (Sigma, 240117) was diluted in DMEM or MEM complete media for a 10% working solution in 2mL total volume. Cells were then treated with 10% 1,6 hexanediol for 5 minutes and z-stack images (2.0um step size, 17 slices) of before and after treatment were captured using a laser scanning confocal microscope (Nikon A1 R).

**Confocal Photobleaching Experiments**

HLE eNE-eGFP and Hep3B eNE-eGFPcells were plated onto 35mm glass bottom dishes (Thermo, 150682) and imaged the next day using a Nikon A1R+ at the TJU Bioimaging Shared Resource Core Facility (Bioimaging Shared Resource of the Sidney Kimmel Cancer Center (NCI 5 P30 CA-56036)or a Zeiss LSM780 NLO confocal/multiphoton microscope. Fluorescence Recover After Photobleaching (FRAP) experiments were carried out using a 405nm laser at 100% intensity to photo bleach a specific region of interest (ROI) after 5 seconds. Fluorescence recovery was imaged every 1 second over a period of 30 seconds and analyzed using FIJI (ImageJ2). For analysis, the fluorescence intensity of each ROI was subtracted with a rolling ball of 10.

**Foci Analysis and Measurements**

Image stacks were collected for quantification on a laser scanning confocal microscope (Nikon A1 R). Maximum intensity projections were used to ensure no foci was excluded per cell.  A two-stage analysis was performed to segment nuclei separately from foci. All quantitative analysis was performed in the General Analysis dialogue of NIS-Elements (Nikon Instruments Inc., build 1973). Nuclear segmentation consisted of either a manual identification using built-in region of interest (ROI) auto-detection functionality and manual adjustment (for the DLCS1 cell line) with low mean intensities or an automated segmentation in the case of cell lines with better signal to noise. For these brighter samples, an Advanced Denoising (power = 9) was used before an interactive range-based thresholding, binary refinement (16x smooth; 6x clean; 4x separate) and a size exclusion of objects smaller than 6.9um). Any nuclei touching the image border was excluded from analysis. Foci segmentation consisted of an image pre-process (Advanced Denoise, power =4; Detect Peaks, kernel 1, count 5x), range-based threshold, minor binary refinement (1x smooth, 1x clean), and binary restrictions to filter non-foci (size <7um, circularity>0.66).  Any foci touching the image border was excluded from measurement. Foci demonstrated slight elongation so to normalize foci orientation, equivalent diameter (EqDiameter) was compared across cell lines. Images were collected with a pixel size of 140nm, allowing for Nyquist measurement of objects 322nm and larger.

**Immunofluorescence on fixed cells**

Acid washed round glass coverslips, 12mm, #1 (Fisher, 50-194-4702) were prepared by washing in 1M HCL at 50°C shaking water bath overnight. Next day, coverslips were cooled to room temperature and washed 3 times with ddH2O for 30 minutes at 50°C followed by ethanol washes. The first wash with 50% ethanol, second wash with 70% ethanol, and third wash with 95% ethanol all for 30 minutes, shaking at 50°C. Acid washed coverslips were placed in Nunc 24-well tissue culture treated plates (Thermo, 142475) then washed five times with 1X PBS (Thermo, 10010023). Cells were seeded onto the coverslips (3.0x10^5 cells) and grown until 70-80% confluency, then fixed with 2-4% paraformaldehyde (2% for endogenous NELFE+GFP knock-in cell lines and 4% for all others0 for 30 minutes at room temperature. Then, cells were permeabilized with 0.05% Triton X-100 for 5 minutes at room temperature, and 500uL of filtered blocking solution (1.5% BSA, 0.15% glycine, 2% normal goat serum) was added to each well and incubated for 1 hour at room temperature with gentle rocking. Primary antibody at the appropriate dilution was added to each appropriate well and incubated overnight. NELFE antibodies used for IF were from Abcam for N’ terminal NELFE (ab170104, 1:500), Proteintech for full length NELFE (107105-1-AP, 1:750) and Santa Cruz for C’ terminal NELFE (sc-377052, 1:200). For GFP+NELFE co-localization immunofluorescence, NELFE (Abcam, ab170104) and GFP (Sigma, 11814460001, 1:500)were used. The next day, coverslips were washed and anti-rabbit secondary antibody (Thermo, A-11005 or A-11012 1:400) was added to each appropriate well at a 1:400 dilution and incubated for 1 hour at room temperature. For GFP+NELFE co-localization, both secondary antibodies for NELFE (Thermo, A-11005 1:500) and GFP (Thermo, A-11001 1:500) were incubated for 1 hour at room temperature followed by washing and mounting. To determine if NELFE co-localized with various nuclear organelles in Hep3B cells, we used NELFE Santa Cruz (sc-377052 1:200, mouse), NELFE Abcam (ab170104 1:500), SC35 Abcam (ab11826 1:1000, mouse) PML MBL (M041-3 1:2000, mouse), SMN Abcam (ab5831 1:2000, mouse), HP1 CST (2616S 1:200, rabbit), and Coilin Abcam (ab87913 1:2000). The next day, coverslips were washed and anti-rabbit secondary, or anti-mouse secondary antibody (Thermo) was added to each appropriate well at a 1:400 dilution and incubated for 1 hour at room temperature. Coverslips were mounted onto uncharged microscope slides (Fisher, 12-544-7) with Prolong Gold Anti-Fade Mounting Media with DAPI (Thermo, P36931) and let dry for 24 hours at room temperature before imaging.

**Cell Proliferation Assay**

Cell proliferation assay was carried out using the Real Time Cell Analysis (RTCA) dual purpose xCELLigence analyzer (Agilent). 1.0x10^5 HCC cells were plated into 6-well plates and lentivirus overexpressing NELFE CDS (full length, ∆LCS1, ∆LCS2) were added to each well with an MOI of 0.5. The media was changed next day followed by transduction of lentivirus expressing shNELFE or shCtrl supplemented with 10 mg/ml polybrene and incubated overnight. The next day, the media was changed to remove the polybrene. Three days post overexpression, a total of 3.0x10^3 cells were plated into 16-well RTCA E-Plate VIEW microplates (Agilent, 300601150) in quadruplicates.

**Cell Colony Formation**

1.0x10^5 HCC cells were plated into 6-well plates and reverse transduced with lentivirus overexpressing NELFE CDS (full length, ∆LCS1, ∆LCS2) was added to each well with an MOI of 0.5. The media was changed next day followed by a forward transduction of lentivirus containing pLKO1-shNELFE or shCtrl supplemented with 10 mg/ml polybrene and incubated overnight. The next day, the media was changed, and cells were cultured for 10 days. Cells were then washed with ice cold 1X PBS, fixed with ice-cold 10% formalin for 1 hour at room temperature, washed with ice cold 1X PBS, stained with 0.05% crystal violet for 2 hours, and finally washed three times with 1X PBS. All colonies were then manually counted using the Bel-Art™ SP SciencewareTM Handheld Colony Counter (Fisher, 07-910-018) and graphed using GraphPad Prism 10.

**Immunoprecipitation assay**

Hep3B and HLE cell lines grew in a 15cm plate until 80% confluency. Cells were washed with ice cold 1XPBS twice and 1 ml of IP lysis buffer (Thermo, Cat. 87787) supplemented with PMSF (1 mM final concentration) have been added and cells were scraped and incubated on ice for 10 min. The whole cell lysates were centrifuged at 13K RPM for 20 min. Then cells were sonicated for 5 minutes with an amplitude of 40% one second on, one second off. The whole cell lysates were centrifuged at 13K RPM for 10 min The IP was performed using NELFE and SMARCB1 agarose beads from Santa Cruz Biotechnology (sc-377052 AC and sc-166165 AC, respectively) for pulling down and IgG agarose beads from Santa Cruz Biotechnology (sc-2343) as a control. Lysates and beads were incubated overnight and then IP products were resuspended with 2 ul of reducing buffer (Thermo), 5 ul of LDS buffer (Thermo), and 13 ul of elution buffer (Thermo) and heated at 70°C for 10 min. Beads were removed from the IP product and the last were loaded into 10% Tris-glycine gels and ran for 1.5 hr at 180 volts. Gel was then transferred onto nitrocellulose membrane for 7 min at 15 volts (iBlot) and blotted using NELFE (sc377052) and SMARCB1 (Abcam ab192864).

**Chip-seq**

ChIP experiments were performed following standard protocols optimized by (<https://www.encodeproject.org/documents/e8a2fef1-580b-45ad-b29c-fffc3d527202/@@download/attachment/ChIP-seq_Protocol_for_RNA-Binding_Proteins_ENCODE_Fu_lab_RuiXiao.pdf>) with minor modifications. Briefly, 3.0x106 Hep3B sgNELFE and Hep3B sgControl cells were plated into 15 cm dish cells and then were cross-linked for 10 min with 1% formaldehyde at 37 °C. This reaction was subsequently quenched with 125 mM glycine for 15 min followed by sonication with an amplitude of 40% one second on, one second off for 15 minutes. Fragmented chromatin fractions were examined on agarose gel to ensure the size range from 100–300 bp. The 95% of whole lysate diluted in the final concentration of 1% Triton X-100, 0.1% sodium deoxycholate and 1X proteinase inhibitor cocktail underwent immunoprecipitation with antibodies bound to beads and the 5% rest was saved as an input control. After decrosslinking, recovered DNA was sent to CD Genomics (Shirley, NY 11967) to sequencing and library construction. The beads and antibodies used for this assay were Dynabeads from Thermo (10004D), H3Kac27 from Abcam (ab4729) and SMARCB1 agarose beads from Santa Cruz Biotechnology (sc-166165 AC).

**Immunohistochemistry**

For IHC assay, formalin-fixed paraffin-embedded (FFPE) tissue sections were used after antigen retrieval with pH9 in Citrat buffer with 1 hour of incubation. Nelfe antibody (Santa Cruz Biotechnology, sc-377052) was used in a dilution of 1/500. The samples were scored according to the Allred score(*1*) (cases with an Allred-score of 5 or less were considered low expressors, 6 or more were considered high expressors.

**Proximity Ligation Assay**

Proximity ligation assay in HCC cell lines was performed using the Duolink® Proximity Ligation Assay (PLA) kit (Sigma-Aldrich), following the Duolink® PLA Fluorescence protocol provided by Sigma-Aldrich with minor modifications. Primary antibodies used were: GFP (Sigma, 11814460001) and SNF5/SMARCB1 (Abcam ab192864). Briefly, HCC cells were grown on coverslips and then fixed with PFA. Duolink® blocking buffer was added to each sample followed by primary antibody incubation and PLA probe incubation. Following appropriate washes, each sample underwent ligation and amplification using the provided kit buffers. The samples were then washed and mounted on glass slides for confocal imaging.

PLA assay was performed in human HCC samples on a tissue microarray using the Duolink® Proximity Ligation Assay (PLA) kit (Sigma-Aldrich), following the Duolink® PLA Fluorescence protocol provided by Sigma-Aldrich with minor modifications. Formalin-fixed paraffin-embedded (FFPE) tissue sections were used after antigen retrieval with pH9 in Citrat buffer. Prior to staining, samples were bleaching with 10% H2O2 in PBS with 0.1% Primary antibodies used were: Nelfe (Santa Cruz Biotechnology, sc-377052) and SMARCB1 (ThermoFisher, MA5-42799).

**Analysis of ATAC-seq**

HEP3B NELFE mAID cell models including those treated at 0,2,24 hours to induce NELFE degradation, as well as LCS rescue cell models including empty vector (EV), full-length (FL), knockdown (KD), deletions ΔLCS1 and ΔLCS2 were utilized alongside sgEV and sgNELFE cell models to assess the role of NELFE in chromatin accessibility. ATAC-seq libraries were prepared from these cells and sequencing on the Illumina HiSeq PE150 platform to a sequencing depth of ~x3 reads and coverage of approximately 50 million paired-ended reads per sample. Raw paired-ended ATAC-seq data were subjected to quality control using FASTQC (v0.12.1). Low-quality bases and adapter sequences were trimmed using Cutadapt (v4.5)(*2*). Reads shorter than 50 bp and those with a Phred score below 20 were discarded to ensure high-quality data for downstream analysis. Cleaned reads were aligned to the GRCh38 human reference genome using BWA-mem (v0.7.17)(*3*) with default parameters to generate binary alignment map (BAMs) files. Aligned reads were indexed and sorted using SAMtools (v1.18)(*4*) marked for PCR duplicates using Picard (v2.27.5). Reads mapping to mitochondrial DNA and ENCODE blacklist regions were removed using bedtools intersect (v 2.31)(*5*) to minimize potential artifacts. Peak calling was performed using MACS3 (v3.0.1)(*6*) at a false detection rate (FDR) threshold of 0.05. Reads were shifted and extended by 75 bp and 150 bp, to account for Tn5 transposase insertion bias respectively. Additional parameters, --nomodel --nolambda --call-summits --keep-dup, were applied to ensure accurate identification of accessible chromatin regions(*7*). A consensus peakset was generated using DiffBind (3.14.0) integrating ATAC-seq and H3K27ac CHIP-seq replicates across all experimental conditions. Overlapping peak regions were identified to represent open and actively transcribed chromatin regions. Genomic coverage signal profiles were extracted using bigwigcompare from the DeepTools suite (v3.5.4) at a resolution of 1 bp. Changes in chromatin accessibility were then visualized by utilizing the computeMatrix and plotHeatmap utilities across consensus peak regions.

**Analysis of SMARCB1 and H3K27AC ChIP-seq**

HEP3B sgNELFE and sgEV cell models were used for H3K27ac chromatin immunoprecipitation sequencing (ChIP-seq) to investigate the impact of NELFE knockdown on histone acetylation patterns associated with active enhancers. ChIP-seq libraries were sequencing on the illumina HiSeq platform with a sequencing depth of approximately 20 million reads. Initial quality control was performed using FASTQC (v0.12.1). Adapter sequences were trimmed using Cutadapt (v4.5)(*2*), discarding reads shorter than 50 bp or with Phred scores below 20. Cleaned reads were aligned to the GRCh38 human reference genome using BWA-MEM (v0.7.17)(*3*) with default parameters. Aligned reads were sorted and indexed using SAMtools (v1.18)(*4*). reads mapping to mitochondrial DNA and ENCODE blacklist regions were removed using Bedtools intersect as described above. Peak calling was conducted using MACS3 (v3.0.1)(*6*) at an FDR of 0.01. The additional parameters, –broad, –broad-cutoff -0.01 and –keep-dup-all were applied to capture broad H3K27ac-enriched regions characteristic of histone modifications. Input DNA from sgEV cells was used as a control for peak calling to normalize background signal. Peaks regions were annotated using HOMER (v4.11)(*4*), assigning nearby genes to peaks for functional analysis. ChIP-seq signal tracks were generated for visualization using DeepTools, and signal coverage was computed across the genome. Pearson correlation analysis was carried between matched ATAC-seq and HE3K27ac regions from counts data extracted with the Subread (v2.0.6)(*8*) package.

**Analysis of GRO-seq**

Global Run-on sequencing (GRO-seq) was conducted to profile nascent transcription and investigate the effects of NELFE knockout on RNA polymerase II dynamics. Sequencing was carried out to a sequencing depth of 40 reads. Standard preprocessing and alignment was conducted as described above. Cleaned reads were aligned to the human GRCh38 reference genome using a Bowtie2 (v0.7.17), employing the –very-sensitive option for accurate alignment of nascent transcripts. A gene counts matrix, including all conditions and biological replicates was loaded into R (v4.3.1). Normalization was performed using the DESeq2 package (v1.32.0) to account for differences in sequencing depth and library size. The RNA polymerase II pausing index was calculated by dividing the read density in promoter regions (defined as -250 bp to 300 bp) by the read density in the gene body (from +301 bp +2 kb). The proximal release ratio was computed as the inverse of PI and was visualized by empirical distribution plots. Genes were further classified into high and moderate to low pausing groups, i.e., Group I and Group II based on the pausing index values.

Reference

1. M. F. Ahmad Fauzi *et al.*, Allred Scoring of ER-IHC Stained Whole-Slide Images for Hormone Receptor Status in Breast Carcinoma. *Diagnostics (Basel)* **12**, (2022).

2. M. Martin, Cutadapt removes adapter sequences from high-throughput sequencing reads. *EMBnet.journal* **17**, (2011).

3. H. Li, R. Durbin, Fast and accurate short read alignment with Burrows-Wheeler transform. *Bioinformatics* **25**, 1754-1760 (2009).

4. H. Li *et al.*, The Sequence Alignment/Map format and SAMtools. *Bioinformatics* **25**, 2078-2079 (2009).

5. A. R. Quinlan, I. M. Hall, BEDTools: a flexible suite of utilities for comparing genomic features. *Bioinformatics* **26**, 841-842 (2010).

6. Y. Zhang *et al.*, Model-based analysis of ChIP-Seq (MACS). *Genome Biol* **9**, R137 (2008).

7. F. Yan, D. R. Powell, D. J. Curtis, N. C. Wong, From reads to insight: a hitchhiker's guide to ATAC-seq data analysis. *Genome Biol* **21**, 22 (2020).

8. Y. Liao, G. K. Smyth, W. Shi, The Subread aligner: fast, accurate and scalable read mapping by seed-and-vote. *Nucleic Acids Res* **41**, e108 (2013).
