# Supplementary material for: Phase separation of NELFE modulates chromatin accessibility to promote dichotomous signaling pathways in hepatocellular carcinoma
Source: Research Square preprint supplement (doi:10.21203/rs.3.rs-5843408/v1), 2025-04-25
Supplement: Supplementary file 4 [file 8b2810ab9d8bb31ebd2daf7c.docx]

**Supplementary Figures**

**Supplementary Figure 1. NELFE undergoes phase separation independent of NELF** (**A**) Co-localization analyses of NELFE and nuclear organelles, including COILIN, HP1, PML, and SC35 in Hep3B cells. Images are at 63X and the scale bar is 10uM. (**B**) Co-localization analyses were performed in Image J (FIJI)’s Coloc 2 package using the Costes algorithm. (**C**) Plot of NELFE turbidity assay controls at various time points. (**D**) Confocal microscopy analysis of Hep3B eNE-eGFP. Images are at 63X, and scale bar is 10uM. (**E**) (left) Schematic of CRISPR/Cas9 guided Homology donated repair (HDR) GFP knockin cell model. gRNA is designed at the stop codon in exon 11. The donor plasmid consists of eGFP and 800bp homology arms. (Right) Immunoblotting of NELFE of Hep3B and HLE eNE-eGFP. GAPDH is used as a loading control. (**F**) Immunofluorescence analyses of two different NELFE antibodies (epitope in the N terminus region and recombinant full length NELFE). Confocal microscopy analysis of Hep3B and HLE eNE-eGFP. Images are at 63X, and scale bar is 10uM. (**G**) (Top) Fluorescent recovery after photobleaching (FRAP) analyses over time of NELFE foci in Hep3B eNE-eGFP cells treated with shCtrl or shNELFA. N=30 cells, data represents mean±SD. (Bottom) confocal images of Hep3B eNE-eGFP cells imaged before and after bleaching. Images are 63X and scale bar are 10 uM.

**Supplementary Figure 2. NELFE modulates chromatin accessibility.** (**A**,**B**) (Left) Immunoblot of NELFE and (Right) DNAse I assay agarose gel of sgEV, sgNELFE, and sgNELFE + eNE-eGFP in Hep3B and HLE respectively.

**Supplementary Figure 3. NELFE depletion affects both paused and non-paused genes.** (**A**) Representatives immunoblot of HCC cells with CRISPR/Cas9 mediated knockout of NELFE (sgNELFE) for NELFA, NELFB, NELFC/D, and NELFE. GAPDH is used as a loading control. (**B**) Schematic of pausing index formula. (**C**) Empirical cumulative distribution function (ECDF) plot of sgEV and sgNELFE in Hep3B CRISPR cells. (**D**) DNAse I digestion assay of Hep3B eNELFE-mAID. gDNA from each group was treated with DNAse I (0, 15, 20, 25, 30, 35, 40 U). (**E**) Heatmap of 11,858 ATAC peaks at 0, 2, and 24 h of 5-Ph-IAA treatment. (**F**) Representatives immunoblot of NELF complex protein expression in Hep3B and Huh1 cells after 72 hours of shRNA mediated knockdown of NELFE (shNELFE), NELFA (shNELFA) or control (shCrtl). Actin is used as a loading control.

**Supplementary Figure 4. NELFE undergoes phase separation to promote HCC progression** (**A**) Schematic of full length NELFE and the LCS mutants. (**B**) Agarose gel of Hep3B and HLE cells treated with shNELFE and overexpressed with various mutants. gDNA from each group was treated with DNASe I (0, 15, 20, 25, 30, 35, 40 U) and (**C**) Immunoblotting of NELF complex proteins in HLE cells and (**D**) NELFE in Hep3B, Huh1, and HLE.(**E**) Cell proliferation and (**F**) colony formation assay in HLE cells. (*p-value < 0.05, One-way ANOVA with Tukey’s posthoc test, data represents mean±SD. (**G**) Images of bioluminescence signal of tumors in NOD/SCID mice at six weeks (left panel). On the right panel, representative livers of one mouse in each group. Scale bars are 1 cm. (**H**) Immunoblotting of NELFE expression in mice tumors. GAPDH was used as a loading control.

**Supplementary Figure 5.** Immunoblottingof NELFC, NELFA and NELFB in Hep3B and HLE eNE-eGFP after deleting DLCS1 region.

**Supplementary Figure 6. NELFE LLPS with SMARCB1 to modulate the chromatin.** (**A**) Centered heatmap of SMARCB1 ChIP-seq signal for 2,325 peaks FDR < 0.01) in Hep3B cells (**B**) (Left)DNAse I digestion assay in parental (sgEV), and SMARCB1 knockout using two different sgRNAs (1-1b, 1-2b) in Hep3B and HLE cell lines.gDNA from each group was treated with DNASe I (0, 15, 20, 25, 30, 35, 40 U). (Right) immunoblot of SMARCB1 in both cell lines. GAPDH is used as a loading control.(**C**)Confocal microscopy showing co-localization between NELFE and SMARCB1 in one of the eNE-DLCS1-eGFP HCC cell lines. Images are at 63X, scale bar is 10uM. (**D**)Proximity ligation assay on Hep3B cells. (Left) Violin plot of nuclear granularity using SMARCB1 and GFP antibody together. Dashed lines represent quartiles, and darker line represents the median (*p-value < 0.05, Student’s t-test, data represents mean±SEM). (Right) Representative images showing the merged red (probe signal) and blue (DAPI) channels using both antibodies together and separately as a negative control. Images are at 40X, and scale bar is 10 uM. (**E**) Proximity ligation assay controls on HLE and Hep3B cell lines. The graph shows the quantification of nuclear granularity using GFP and SMARB1 antibodies alone as a negative control in both cell lines. Dashed lines represent quartiles, and darker line represents the median. (**F**) Immunohistochemistry of human tissue samples of high and low NELFE expression. Images are at 40X, and scale bar is 100 uM. (**G**) Proximity ligation assay controls on human samples. (Left) Representative images showing the merged yellow (probe signal) and blue (DAPI) channels using both antibodies together separately as a negative control. Images are at 40X, and scale bar is 20 uM. (Right) Violin plot of nuclear granularity using NELFE and SMARB1 antibodies alone. Dashed lines represent quartiles, and darker line represents the median.
