# Supplementary material for: Phase separation of NELFE modulates chromatin accessibility to promote dichotomous signaling pathways in hepatocellular carcinoma
Source: Research Square preprint supplement (doi:10.21203/rs.3.rs-5843408/v1), 2025-04-25
Supplement: Supplementary file 5 [file b09cd54b0c9c0d8c662dd773.xlsx]

## Sheet: Summary
Wistar Proteomics and Metabolomics Facility
Sample Preparation and LC-MS/MS analysis
1	Two gels with a total of 12 samples were processed.
2	The entire stained gel regions were excised, reduced with TCEP, alkylated with iodoacetamide, and digested with trypsin (see PowerPoint).
3	Tryptic digests were analyzed using a standard 1.5-hr LC gradient on the Thermo Q Exactive HF mass spectrometer.
Data Analysis
1	MS data were searched with full tryptic specificity against the UniProt human proteome database (10/02/2020) and a common contaminant database using MaxQuant 1.6.17.0.
2	Variable modifications considered in the search were protein N-terminal acetylation, Asn deamidation, and Met oxidation.
3	“Match between runs” feature was not enabled.
4	Protein and peptide false discovery rate was set at 1%.
5	The "All Proteins" sheet contains the entire output of MaxQuant.
6	The "Filtered Proteins" sheet contains a filtered list of proteins with common contaminants and incorrect protein identifications removed. This is the main sheet to look at. Some columns were hidden to simplify the sheet.
		Each row contains a protein group, i.e. a group of proteins that are sufficiently similar (e.g. homologs, isoforms, redundant database entries) and cannot be distinguished based on their identified peptides.
		Protein quantification was performed using Razor + unique peptides. Razor peptides are shared (non-unique) peptides assigned to the protein group with the most other peptides (Occam's razor principle).
		Proteins identified by a single razor+unique peptide are considered low confidence.
		MS/MS count refers to how many times peptides belonging to the protein were sequenced. The more abundant the protein, the more MS/MS counts will be generated.
		Intensity is the sum of the peptide MS peak intensities for the protein. Quantitation based on intensity is more accurate than MS/MS count.
		iBAQ (Intensity Based Absolute Quantification) is protein intensity divided by the number of theoretical peptides.
			iBAQ values are roughly considered to be proportional to the molar quantities of the proteins.
			You can sort (largest to smallest order) on the iBAQ columns to determine which proteins are more abundant WITHIN a sample.
		LFQ (Label-free quantification) intensity is Intensity normalized on multiple levels to ensure that profiles of LFQ intensities across samples accurately reflect the amount of proteins in the samples.
			LFQ is used for global proteomic comparison between cells where we do not expect a lot of changes in one condition.
			For pulldown or immunoprecipitation experiments where significant changes in the proteomes are expected, LFQ intensities should NOT be used for quantitative comparison between samples.
			LFQ normalization is done using the MaxLFQ algorithm (http://www.ncbi.nlm.nih.gov/pmc/articles/PMC4159666/).
7	Fold change was calculated based on Intensity. You can sort on the fold change columns to see which proteins are uniquely found or more abundant in one sample versus the other.
		To calculate the fold change, proteins not identified in one of the samples compared were assigned the Intensity value 100,000 (which is ~4x lower than the minimum value).
		The formula for calculating fold change is left intact.
		Be aware that proteins identified by a single razor+unique peptide are considered low confidence.
8	The "Filtered Peptides" sheet shows the peptides identified.

## Sheet: labels
UIgGCE: HUH1,IgG, Cyto
UIPCE: HUH1,NELFE-IP, Cyto
UIgGNE: HUH1,IgG, Nuclear
UIPNE: HUH1,NELFE-IP, Nuclear
BIgGCE: Hep3B,IgG, Cyto
BIPCE: Hep3B,NELFE-IP, Cyto
BIgGNE: Hep3B,IgG, Nuclear
BIPNE: Hep3B,NELFE-IP, Nuclear

## Sheet: All Proteins
id	Protein IDs	Majority protein IDs	Peptide counts (all)	Peptide counts (razor+unique)	Peptide counts (unique)	Protein names	Gene names	Fasta headers	Number of proteins	Peptides	Razor + unique peptides	Unique peptides	Peptides 1-UIgGC	Peptides 1-UIgGN	Peptides 1-UIPAC	Peptides 1-UIPAN	Peptides 1-UIPC	Peptides 1-UIPN	Peptides 2-BIgGC	Peptides 2-BIgGN	Peptides 2-BIPAC	Peptides 2-BIPAN	Peptides 2-BIPC	Peptides 2-BIPN	Razor + unique peptides 1-UIgGC	Razor + unique peptides 1-UIgGN	Razor + unique peptides 1-UIPAC	Razor + unique peptides 1-UIPAN	Razor + unique peptides 1-UIPC	Razor + unique peptides 1-UIPN	Razor + unique peptides 2-BIgGC	Razor + unique peptides 2-BIgGN	Razor + unique peptides 2-BIPAC	Razor + unique peptides 2-BIPAN	Razor + unique peptides 2-BIPC	Razor + unique peptides 2-BIPN	Unique peptides 1-UIgGC	Unique peptides 1-UIgGN	Unique peptides 1-UIPAC	Unique peptides 1-UIPAN	Unique peptides 1-UIPC	Unique peptides 1-UIPN	Unique peptides 2-BIgGC	Unique peptides 2-BIgGN	Unique peptides 2-BIPAC	Unique peptides 2-BIPAN	Unique peptides 2-BIPC	Unique peptides 2-BIPN	Sequence coverage [%]
0	A0A024QYW1	A0A024QYW1	1	1	1		DKFZp434N035	tr|A0A024QYW1|A0A024QYW1_HUMAN Transmembrane protein 191C OS=Homo sapiens OX=9606 GN=TMEM191C PE=4 SV=1	1	1	1	1	0	0	1	0	0	0	0	0	0	0	0	0	0	0	1	0	0	0	0	0	0	0	0	0	0	0	1	0	0	0	0	0	0	0	0	0	9.4
1	P35237;A0A2R8YD12;A0A024QZX5;A0A087X1N8;A0A2R8Y6A7	P35237;A0A2R8YD12;A0A024QZX5;A0A087X1N8;A0A2R8Y6A7	3;3;3;3;2	3;3;3;3;2	3;3;3;3;2	Serpin B6	SERPINB6	sp|P35237|SPB6_HUMAN Serpin B6 OS=Homo sapiens OX=9606 GN=SERPINB6 PE=1 SV=3;tr|A0A2R8YD12|A0A2R8YD12_HUMAN Serpin B6 OS=Homo sapiens OX=9606 GN=SERPINB6 PE=1 SV=1;tr|A0A024QZX5|A0A024QZX5_HUMAN Serpin B6 OS=Homo sapiens OX=9606 GN=SERPINB6 PE=1 SV=1;tr|A0	5	3	3	3	0	0	0	0	1	0	1	0	0	0	3	0	0	0	0	0	1	0	1	0	0	0	3	0	0	0	0	0	1	0	1	0	0	0	3	0	12.2
2	A0A024R4E5;Q00341;Q00341-2;H0Y394;H7C0A4;C9JIZ1;C9JZI8;C9J5E5;H7C2D1;C9JHZ8;C9JES8;H7BZC3;C9JHS7;C9JK79;C9JT62;C9JHN6;C9JEJ8;C9JBS3;C9JQ82;C9JMQ6;C9J739;C9JHS9	A0A024R4E5;Q00341;Q00341-2;H0Y394	31;30;27;21;12;9;7;7;6;6;6;5;5;4;4;3;3;3;2;2;1;1	31;30;27;21;12;9;7;7;6;6;6;5;5;4;4;3;3;3;2;2;1;1	31;30;27;21;12;9;7;7;6;6;6;5;5;4;4;3;3;3;2;2;1;1	Vigilin	HDLBP	tr|A0A024R4E5|A0A024R4E5_HUMAN High density lipoprotein binding protein (Vigilin), isoform CRA_a OS=Homo sapiens OX=9606 GN=HDLBP PE=1 SV=1;sp|Q00341|VIGLN_HUMAN Vigilin OS=Homo sapiens OX=9606 GN=HDLBP PE=1 SV=2;sp|Q00341-2|VIGLN_HUMAN Isoform 2 of Vigili	22	31	31	31	10	0	6	0	10	0	2	0	20	0	10	0	10	0	6	0	10	0	2	0	20	0	10	0	10	0	6	0	10	0	2	0	20	0	10	0	33.9
3	Q9BXJ8;A0A087WZA9;A0A024R4K9;A0A087X266;Q9BXJ8-2	Q9BXJ8;A0A087WZA9;A0A024R4K9;A0A087X266;Q9BXJ8-2	6;6;6;6;6	6;6;6;6;6	6;6;6;6;6	Transmembrane protein 120A	TMEM120A;TMPIT	sp|Q9BXJ8|TACAN_HUMAN Ion channel TACAN OS=Homo sapiens OX=9606 GN=TMEM120A PE=1 SV=1;tr|A0A087WZA9|A0A087WZA9_HUMAN Ion channel TACAN (Fragment) OS=Homo sapiens OX=9606 GN=TMEM120A PE=1 SV=1;tr|A0A024R4K9|A0A024R4K9_HUMAN Transmembrane protein 120A OS=Hom	5	6	6	6	0	0	6	0	0	0	0	0	0	0	0	0	0	0	6	0	0	0	0	0	0	0	0	0	0	0	6	0	0	0	0	0	0	0	0	0	22.2
4	P01009;A0A024R6I7;A0A0G2JRN3;P01009-2	P01009;A0A024R6I7;A0A0G2JRN3;P01009-2	2;2;1;1	2;2;1;1	2;2;1;1	Alpha-1-antitrypsin;Short peptide from AAT	SERPINA1	sp|P01009|A1AT_HUMAN Alpha-1-antitrypsin OS=Homo sapiens OX=9606 GN=SERPINA1 PE=1 SV=3;tr|A0A024R6I7|A0A024R6I7_HUMAN Alpha-1-antitrypsin OS=Homo sapiens OX=9606 GN=SERPINA1 PE=1 SV=1;tr|A0A0G2JRN3|A0A0G2JRN3_HUMAN Alpha-1-antitrypsin OS=Homo sapiens OX=96	4	2	2	2	2	0	0	0	0	0	0	0	0	0	0	0	2	0	0	0	0	0	0	0	0	0	0	0	2	0	0	0	0	0	0	0	0	0	0	0	7.9
5	Q7Z739;A0A024R7W5;A0A087X0Q1;A0A087WY31	Q7Z739;A0A024R7W5;A0A087X0Q1;A0A087WY31	9;9;9;9	4;4;4;4	4;4;4;4	YTH domain-containing family protein 3	YTHDF3	sp|Q7Z739|YTHD3_HUMAN YTH domain-containing family protein 3 OS=Homo sapiens OX=9606 GN=YTHDF3 PE=1 SV=1;tr|A0A024R7W5|A0A024R7W5_HUMAN YTH domain family, member 3, isoform CRA_a OS=Homo sapiens OX=9606 GN=YTHDF3 PE=1 SV=1;tr|A0A087X0Q1|A0A087X0Q1_HUMAN YT	4	9	4	4	3	0	1	1	3	3	3	1	7	1	4	4	0	0	0	0	0	0	0	0	4	0	0	0	0	0	0	0	0	0	0	0	4	0	0	0	22.2
6	P25787;H7C402;H3BT36;A0A024RA52	P25787;H7C402;H3BT36;A0A024RA52	1;1;1;1	1;1;1;1	1;1;1;1	Proteasome subunit alpha type-2;Proteasome subunit alpha type	PSMA2	sp|P25787|PSA2_HUMAN Proteasome subunit alpha type-2 OS=Homo sapiens OX=9606 GN=PSMA2 PE=1 SV=2;tr|H7C402|H7C402_HUMAN Proteasome subunit alpha type-2 (Fragment) OS=Homo sapiens OX=9606 GN=PSMA2 PE=1 SV=1;tr|H3BT36|H3BT36_HUMAN PROTEASOME_ALPHA_1 domain-co	4	1	1	1	0	0	1	0	0	0	0	0	0	0	0	0	0	0	1	0	0	0	0	0	0	0	0	0	0	0	1	0	0	0	0	0	0	0	0	0	9
7	Q14241;A0A024RAC6	Q14241;A0A024RAC6	6;6	6;6	6;6	Transcription elongation factor B polypeptide 3	TCEB3	sp|Q14241|ELOA1_HUMAN Elongin-A OS=Homo sapiens OX=9606 GN=ELOA PE=1 SV=2;tr|A0A024RAC6|A0A024RAC6_HUMAN Elongin-A OS=Homo sapiens OX=9606 GN=ELOA PE=1 SV=1	2	6	6	6	0	0	6	0	0	0	0	0	0	0	0	0	0	0	6	0	0	0	0	0	0	0	0	0	0	0	6	0	0	0	0	0	0	0	0	0	11.9
8	Q96BI1;A0A024RCG2;E9PRM7;A0A0J9YWM3	Q96BI1;A0A024RCG2;E9PRM7;A0A0J9YWM3	5;5;3;3	5;5;3;3	5;5;3;3	Solute carrier family 22 member 18	SLC22A18	sp|Q96BI1|S22AI_HUMAN Solute carrier family 22 member 18 OS=Homo sapiens OX=9606 GN=SLC22A18 PE=1 SV=3;tr|A0A024RCG2|A0A024RCG2_HUMAN Solute carrier family 22 (Organic cation transporter), member 18, isoform CRA_a OS=Homo sapiens OX=9606 GN=SLC22A18 PE=1 S	4	5	5	5	1	1	5	0	2	0	0	0	3	0	1	0	1	1	5	0	2	0	0	0	3	0	1	0	1	1	5	0	2	0	0	0	3	0	1	0	18.2
9	Q14135;G5E9M7;G5E9M9;A0A075B6E4;A0A0A6YYI5;Q14135-5;Q14135-6;Q14135-2;Q14135-4;F8W708;E7ERW0;E7EQU6;E7EWF5	Q14135;G5E9M7;G5E9M9;A0A075B6E4;A0A0A6YYI5;Q14135-5;Q14135-6;Q14135-2;Q14135-4;F8W708;E7ERW0;E7EQU6;E7EWF5	2;2;2;2;2;2;2;2;2;1;1;1;1	2;2;2;2;2;2;2;2;2;1;1;1;1	2;2;2;2;2;2;2;2;2;1;1;1;1	Transcription cofactor vestigial-like protein 4	VGLL4	sp|Q14135|VGLL4_HUMAN Transcription cofactor vestigial-like protein 4 OS=Homo sapiens OX=9606 GN=VGLL4 PE=1 SV=4;tr|G5E9M7|G5E9M7_HUMAN Transcription cofactor vestigial-like protein 4 OS=Homo sapiens OX=9606 GN=VGLL4 PE=1 SV=1;tr|G5E9M9|G5E9M9_HUMAN Transc	13	2	2	2	0	0	0	0	0	0	2	0	0	0	0	0	0	0	0	0	0	0	2	0	0	0	0	0	0	0	0	0	0	0	2	0	0	0	0	0	12.8
10	A0A075B6E5	A0A075B6E5	11	1	1		ENAH	tr|A0A075B6E5|A0A075B6E5_HUMAN Protein enabled homolog (Fragment) OS=Homo sapiens OX=9606 GN=ENAH PE=1 SV=2	1	11	1	1	1	0	0	0	1	0	10	0	0	0	8	0	0	0	0	0	0	0	1	0	0	0	0	0	0	0	0	0	0	0	1	0	0	0	0	0	52.1
11	P11532;A0A087WTU7;A0A5H1ZRP8;A0A087WV90;A0A075B6G3;P11532-4;P11532-11;P11532-2;H0Y304;P11532-3;A0A5H1ZRQ8;A0A5H1ZRP9;A0A5H1ZRQ1;A0A5H1ZRP7;P11532-13;P11532-9;A0A5H1ZRR9;P11532-5;P11532-7;P11532-16;P11532-14;P11532-6;P11532-17;P11532-12;P11532-8;P11532-15;P11532-18;H0Y3E8	P11532;A0A087WTU7;A0A5H1ZRP8;A0A087WV90;A0A075B6G3;P11532-4;P11532-11;P11532-2;H0Y304;P11532-3;A0A5H1ZRQ8;A0A5H1ZRP9;A0A5H1ZRQ1;A0A5H1ZRP7;P11532-13;P11532-9;A0A5H1ZRR9;P11532-5;P11532-7;P11532-16;P11532-14;P11532-6;P11532-17;P11532-12;P11532-8;P11532-15	5;5;5;5;5;5;5;4;4;4;3;3;3;3;3;3;3;3;3;3;3;3;3;3;3;3;2;2	3;3;3;3;3;3;3;3;3;3;2;2;2;2;2;2;2;2;2;2;2;2;2;2;2;2;2;2	3;3;3;3;3;3;3;3;3;3;2;2;2;2;2;2;2;2;2;2;2;2;2;2;2;2;2;2	Dystrophin	DMD	sp|P11532|DMD_HUMAN Dystrophin OS=Homo sapiens OX=9606 GN=DMD PE=1 SV=3;tr|A0A087WTU7|A0A087WTU7_HUMAN Dystrophin OS=Homo sapiens OX=9606 GN=DMD PE=1 SV=1;tr|A0A5H1ZRP8|A0A5H1ZRP8_HUMAN Dystrophin OS=Homo sapiens OX=9606 GN=DMD PE=1 SV=1;tr|A0A087WV90|A0A0	28	5	3	3	0	0	3	0	1	0	1	0	1	0	1	0	0	0	2	0	1	0	1	0	0	0	0	0	0	0	2	0	1	0	1	0	0	0	0	0	1.4
12	A0A0C4DH90;A0A075B6H7;A0A0C4DH55;P01624	A0A0C4DH90;A0A075B6H7;A0A0C4DH55;P01624	1;1;1;1	1;1;1;1	1;1;1;1	Ig kappa chain V-III region POM	IGKV3OR2-268;IGKV3-7;IGKV3D-7	tr|A0A0C4DH90|A0A0C4DH90_HUMAN Immunoglobulin kappa variable 3/OR2-268 (non-functional) (Fragment) OS=Homo sapiens OX=9606 GN=IGKV3OR2-268 PE=4 SV=5;sp|A0A075B6H7|KV37_HUMAN Probable non-functional immunoglobulin kappa variable 3-7 OS=Homo sapiens OX=9606	4	1	1	1	1	1	0	1	1	1	1	1	0	1	1	0	1	1	0	1	1	1	1	1	0	1	1	0	1	1	0	1	1	1	1	1	0	1	1	0	7.8
13	A0A075B6I0	A0A075B6I0	1	1	1		IGLV8-61	sp|A0A075B6I0|LV861_HUMAN Immunoglobulin lambda variable 8-61 OS=Homo sapiens OX=9606 GN=IGLV8-61 PE=3 SV=7	1	1	1	1	1	1	0	0	0	0	1	1	0	0	0	0	1	1	0	0	0	0	1	1	0	0	0	0	1	1	0	0	0	0	1	1	0	0	0	0	7.4
14	A0A075B6J2	A0A075B6J2	1	1	1		IGLV2-33	sp|A0A075B6J2|LV233_HUMAN Probable non-functional immunoglobulin lambda variable 2-33 OS=Homo sapiens OX=9606 GN=IGLV2-33 PE=5 SV=2	1	1	1	1	1	1	0	0	0	0	1	1	0	0	0	0	1	1	0	0	0	0	1	1	0	0	0	0	1	1	0	0	0	0	1	1	0	0	0	0	7.6
15	A0A5H1ZRS2;A0A075B6P5;P01615	A0A5H1ZRS2;A0A075B6P5;P01615	3;3;3	1;1;1	1;1;1	Ig kappa chain V-II region FR	IGKV2D-28	tr|A0A5H1ZRS2|A0A5H1ZRS2_HUMAN Immunoglobulin kappa variable 2D-28 OS=Homo sapiens OX=9606 GN=IGKV2D-28 PE=1 SV=1;sp|A0A075B6P5|KV228_HUMAN Immunoglobulin kappa variable 2-28 OS=Homo sapiens OX=9606 GN=IGKV2-28 PE=3 SV=1;sp|P01615|KVD28_HUMAN Immunoglobuli	3	3	1	1	2	2	0	1	1	1	1	2	0	0	1	1	1	1	0	0	0	0	0	0	0	0	0	0	1	1	0	0	0	0	0	0	0	0	0	0	30.4
16	Q5T0N5;Q5T0N5-4;A0A075B6Q2;S4R347;Q5T0N5-3;Q5T0N5-2;Q5T0N5-5	Q5T0N5;Q5T0N5-4;A0A075B6Q2;S4R347;Q5T0N5-3;Q5T0N5-2;Q5T0N5-5	2;2;2;2;2;2;2	2;2;2;2;2;2;2	2;2;2;2;2;2;2	Formin-binding protein 1-like	FNBP1L	sp|Q5T0N5|FBP1L_HUMAN Formin-binding protein 1-like OS=Homo sapiens OX=9606 GN=FNBP1L PE=1 SV=3;sp|Q5T0N5-4|FBP1L_HUMAN Isoform 4 of Formin-binding protein 1-like OS=Homo sapiens OX=9606 GN=FNBP1L;tr|A0A075B6Q2|A0A075B6Q2_HUMAN Formin-binding protein 1-lik	7	2	2	2	0	0	1	0	0	0	0	0	0	0	2	0	0	0	1	0	0	0	0	0	0	0	2	0	0	0	1	0	0	0	0	0	0	0	2	0	6
17	A0A0C4DH68;A0A075B6R9	A0A0C4DH68;A0A075B6R9	1;1	1;1	1;1		IGKV2-24;IGKV2D-24	sp|A0A0C4DH68|KV224_HUMAN Immunoglobulin kappa variable 2-24 OS=Homo sapiens OX=9606 GN=IGKV2-24 PE=3 SV=1;sp|A0A075B6R9|KVD24_HUMAN Probable non-functional immunoglobulin kappa variable 2D-24 OS=Homo sapiens OX=9606 GN=IGKV2D-24 PE=5 SV=1	2	1	1	1	0	0	0	0	0	0	1	0	0	0	0	0	0	0	0	0	0	0	1	0	0	0	0	0	0	0	0	0	0	0	1	0	0	0	0	0	10.8
18	A0A5H1ZRS9;A2NJV5;A0A075B6S2;A0A0A0MRZ7;P01614;A0A087X0Q4;A0A075B6S6;A0A087WW87;P06310	A0A5H1ZRS9;A2NJV5;A0A075B6S2;A0A0A0MRZ7;P01614;A0A087X0Q4;A0A075B6S6;A0A087WW87;P06310	4;4;4;3;2;2;2;2;2	4;4;4;3;2;2;2;2;2	2;2;2;1;0;0;0;0;0	Ig kappa chain V-II region Cum;Ig kappa chain V-II region RPMI 6410	IGKV A18;IGKV2D-29;IGKV2D-26;IGKV2-40;IGKV2D-30	tr|A0A5H1ZRS9|A0A5H1ZRS9_HUMAN Immunoglobulin kappa variable 2D-29 OS=Homo sapiens OX=9606 GN=IGKV2D-29 PE=1 SV=1;sp|A2NJV5|KV229_HUMAN Immunoglobulin kappa variable 2-29 OS=Homo sapiens OX=9606 GN=IGKV2-29 PE=3 SV=2;sp|A0A075B6S2|KVD29_HUMAN Immunoglobuli	9	4	4	2	2	2	0	1	1	1	2	4	0	0	1	1	2	2	0	1	1	1	2	4	0	0	1	1	1	1	0	0	0	0	1	2	0	0	0	0	33.3
19	Q9C0C7;A0A075B6T1;Q9C0C7-4;Q9C0C7-2;Q9C0C7-3;Q9C0C7-5;Q9C0C7-6;H0YE34	Q9C0C7;A0A075B6T1;Q9C0C7-4;Q9C0C7-2;Q9C0C7-3;Q9C0C7-5;Q9C0C7-6	4;4;4;4;4;4;3;1	4;4;4;4;4;4;3;1	4;4;4;4;4;4;3;1	Activating molecule in BECN1-regulated autophagy protein 1	AMBRA1	sp|Q9C0C7|AMRA1_HUMAN Activating molecule in BECN1-regulated autophagy protein 1 OS=Homo sapiens OX=9606 GN=AMBRA1 PE=1 SV=2;tr|A0A075B6T1|A0A075B6T1_HUMAN Activating molecule in BECN1-regulated autophagy protein 1 OS=Homo sapiens OX=9606 GN=AMBRA1 PE=1 SV	8	4	4	4	0	0	0	0	2	0	0	0	0	0	3	0	0	0	0	0	2	0	0	0	0	0	3	0	0	0	0	0	2	0	0	0	0	0	3	0	7.8
20	A0A075B730	A0A075B730	130	1	1		EPPK1	tr|A0A075B730|A0A075B730_HUMAN Epiplakin OS=Homo sapiens OX=9606 GN=EPPK1 PE=1 SV=2	1	130	1	1	5	5	8	6	20	4	51	26	49	23	120	29	0	0	0	0	0	0	0	0	0	0	1	0	0	0	0	0	0	0	0	0	0	0	1	0	70.6
21	O00623;A0A075B773	O00623;A0A075B773	1;1	1;1	1;1	Peroxisome assembly protein 12	PEX12	sp|O00623|PEX12_HUMAN Peroxisome assembly protein 12 OS=Homo sapiens OX=9606 GN=PEX12 PE=1 SV=1;tr|A0A075B773|A0A075B773_HUMAN Peroxisome assembly protein 12 OS=Homo sapiens OX=9606 GN=PEX12 PE=1 SV=2	2	1	1	1	0	0	0	0	0	0	0	0	1	0	0	0	0	0	0	0	0	0	0	0	1	0	0	0	0	0	0	0	0	0	0	0	1	0	0	0	7
22	Q16787;A0A075B783;A0A0A0MSA0;Q16787-3	Q16787;A0A075B783;A0A0A0MSA0;Q16787-3	2;2;2;2	1;1;1;1	1;1;1;1	Laminin subunit alpha-3	LAMA3	sp|Q16787|LAMA3_HUMAN Laminin subunit alpha-3 OS=Homo sapiens OX=9606 GN=LAMA3 PE=1 SV=2;tr|A0A075B783|A0A075B783_HUMAN Laminin subunit alpha-3 OS=Homo sapiens OX=9606 GN=LAMA3 PE=1 SV=1;tr|A0A0A0MSA0|A0A0A0MSA0_HUMAN Laminin subunit alpha-3 OS=Homo sapien	4	2	1	1	0	0	0	0	0	0	1	0	0	0	1	0	0	0	0	0	0	0	1	0	0	0	0	0	0	0	0	0	0	0	1	0	0	0	0	0	1.1
23	Q9P260;A0A075B785;A0A2R8Y566;Q9P260-2	Q9P260;A0A075B785;A0A2R8Y566;Q9P260-2	1;1;1;1	1;1;1;1	1;1;1;1	LisH domain and HEAT repeat-containing protein KIAA1468	KIAA1468	sp|Q9P260|RELCH_HUMAN RAB11-binding protein RELCH OS=Homo sapiens OX=9606 GN=RELCH PE=1 SV=2;tr|A0A075B785|A0A075B785_HUMAN RAB11-binding protein RELCH OS=Homo sapiens OX=9606 GN=RELCH PE=1 SV=7;tr|A0A2R8Y566|A0A2R8Y566_HUMAN RAB11-binding protein RELCH OS	4	1	1	1	0	0	1	0	0	0	0	0	1	0	0	0	0	0	1	0	0	0	0	0	1	0	0	0	0	0	1	0	0	0	0	0	1	0	0	0	1
24	Q9Y314;A0A075B797;M0R3B2;A0A075B6F9	Q9Y314;A0A075B797;M0R3B2;A0A075B6F9	2;2;2;1	2;2;2;1	2;2;2;1	Nitric oxide synthase-interacting protein	NOSIP	sp|Q9Y314|NOSIP_HUMAN Nitric oxide synthase-interacting protein OS=Homo sapiens OX=9606 GN=NOSIP PE=1 SV=1;tr|A0A075B797|A0A075B797_HUMAN E3 ubiquitin-protein ligase NOSIP (Fragment) OS=Homo sapiens OX=9606 GN=NOSIP PE=1 SV=1;tr|M0R3B2|M0R3B2_HUMAN E3 ubiq	4	2	2	2	0	0	2	0	0	0	0	0	1	0	0	0	0	0	2	0	0	0	0	0	1	0	0	0	0	0	2	0	0	0	0	0	1	0	0	0	12
25	Q9NRA0;Q9NRA0-3;M0R0E9;A0A075B7A1;M0R344;Q9NRA0-4;Q9NRA0-2;Q9NRA0-5	Q9NRA0;Q9NRA0-3;M0R0E9;A0A075B7A1;M0R344;Q9NRA0-4;Q9NRA0-2;Q9NRA0-5	1;1;1;1;1;1;1;1	1;1;1;1;1;1;1;1	1;1;1;1;1;1;1;1	Sphingosine kinase 2	SPHK2	sp|Q9NRA0|SPHK2_HUMAN Sphingosine kinase 2 OS=Homo sapiens OX=9606 GN=SPHK2 PE=1 SV=2;sp|Q9NRA0-3|SPHK2_HUMAN Isoform 3 of Sphingosine kinase 2 OS=Homo sapiens OX=9606 GN=SPHK2;tr|M0R0E9|M0R0E9_HUMAN Sphingosine kinase 2 OS=Homo sapiens OX=9606 GN=SPHK2 PE	8	1	1	1	0	0	0	0	0	0	0	0	1	1	1	0	0	0	0	0	0	0	0	0	1	1	1	0	0	0	0	0	0	0	0	0	1	1	1	0	1.7
26	O75044;Q7Z6B7;A0A075B7B5;G5EA48;B7ZM87;Q7Z6B7-2;P0DJJ0;P0DMP2;A0A075B7C8;A0A075B743;Q5VZB4;A0A286YEY3	O75044;Q7Z6B7;A0A075B7B5;G5EA48;B7ZM87;Q7Z6B7-2;P0DJJ0;P0DMP2;A0A075B7C8;A0A075B743;Q5VZB4;A0A286YEY3	2;2;2;2;2;2;1;1;1;1;1;1	2;2;2;2;2;2;1;1;1;1;1;1	2;2;2;2;2;2;1;1;1;1;1;1	SLIT-ROBO Rho GTPase-activating protein 2;SLIT-ROBO Rho GTPase-activating protein 1;SLIT-ROBO Rho GTPase-activating protein 2C;SLIT-ROBO Rho GTPase-activating protein 2B	SRGAP2;SRGAP1;SRGAP2C;SRGAP2B	sp|O75044|SRGP2_HUMAN SLIT-ROBO Rho GTPase-activating protein 2 OS=Homo sapiens OX=9606 GN=SRGAP2 PE=1 SV=3;sp|Q7Z6B7|SRGP1_HUMAN SLIT-ROBO Rho GTPase-activating protein 1 OS=Homo sapiens OX=9606 GN=SRGAP1 PE=1 SV=1;tr|A0A075B7B5|A0A075B7B5_HUMAN SLIT-ROBO	12	2	2	2	0	0	1	0	1	0	0	0	0	0	1	0	0	0	1	0	1	0	0	0	0	0	1	0	0	0	1	0	1	0	0	0	0	0	1	0	2.2
27	A0A075B7D0	A0A075B7D0	1	1	1		IGHV1OR15-1	tr|A0A075B7D0|A0A075B7D0_HUMAN Immunoglobulin heavy variable 1/OR15-1 (non-functional) (Fragment) OS=Homo sapiens OX=9606 GN=IGHV1OR15-1 PE=1 SV=1	1	1	1	1	1	1	0	0	0	0	1	1	0	0	0	0	1	1	0	0	0	0	1	1	0	0	0	0	1	1	0	0	0	0	1	1	0	0	0	0	9.4
28	Q16881;E9PIR7;Q16881-4;Q16881-6;Q16881-2;Q16881-5;A0A087WSY9;A0A182DWI3;Q16881-3;A0A087WSW9;F8W809;E2QRB9;Q16881-7;E9PKD3;A0A0B4J225;E9PIZ5;E9PQI3;E9PKI4;E9PLT3;E9PRI8	Q16881;E9PIR7;Q16881-4;Q16881-6;Q16881-2;Q16881-5;A0A087WSY9;A0A182DWI3;Q16881-3;A0A087WSW9;F8W809;E2QRB9;Q16881-7	13;13;13;13;13;13;13;13;13;13;13;12;12;6;3;3;1;1;1;1	13;13;13;13;13;13;13;13;13;13;13;12;12;6;3;3;1;1;1;1	13;13;13;13;13;13;13;13;13;13;13;12;12;6;3;3;1;1;1;1	Thioredoxin reductase 1, cytoplasmic	TXNRD1	sp|Q16881|TRXR1_HUMAN Thioredoxin reductase 1, cytoplasmic OS=Homo sapiens OX=9606 GN=TXNRD1 PE=1 SV=3;tr|E9PIR7|E9PIR7_HUMAN Thioredoxin-disulfide reductase OS=Homo sapiens OX=9606 GN=TXNRD1 PE=1 SV=1;sp|Q16881-4|TRXR1_HUMAN Isoform 4 of Thioredoxin reduc	20	13	13	13	11	0	5	0	7	0	0	0	0	0	0	0	11	0	5	0	7	0	0	0	0	0	0	0	11	0	5	0	7	0	0	0	0	0	0	0	28.2
29	Q5EBL2;A0A087WSX5	Q5EBL2;A0A087WSX5	4;4	4;4	4;4	Zinc finger protein 628	ZNF628	sp|Q5EBL2|ZN628_HUMAN Zinc finger protein 628 OS=Homo sapiens OX=9606 GN=ZNF628 PE=1 SV=3;tr|A0A087WSX5|A0A087WSX5_HUMAN Zinc finger protein 628 OS=Homo sapiens OX=9606 GN=ZNF628 PE=1 SV=1	2	4	4	4	0	2	0	0	0	2	0	0	0	0	0	0	0	2	0	0	0	2	0	0	0	0	0	0	0	2	0	0	0	2	0	0	0	0	0	0	7.8
30	A0A087WSY6	A0A087WSY6	1	1	1		IGKV3D-15	sp|A0A087WSY6|KVD15_HUMAN Immunoglobulin kappa variable 3D-15 OS=Homo sapiens OX=9606 GN=IGKV3D-15 PE=3 SV=6	1	1	1	1	1	1	0	0	0	0	1	1	0	0	0	0	1	1	0	0	0	0	1	1	0	0	0	0	1	1	0	0	0	0	1	1	0	0	0	0	7.8
31	P36969;K7ERP4;A0A087X2I2;A0A087WT12;P36969-2;K7EKX7;K7ENB4;K7EJ20;R4GNE4;A0A0A0MTT1;A0A087X247	P36969;K7ERP4;A0A087X2I2;A0A087WT12;P36969-2;K7EKX7;K7ENB4;K7EJ20;R4GNE4;A0A0A0MTT1	8;8;8;8;8;7;7;7;6;4;3	8;8;8;8;8;7;7;7;6;4;3	8;8;8;8;8;7;7;7;6;4;3	Phospholipid hydroperoxide glutathione peroxidase, mitochondrial;Glutathione peroxidase	GPX4	sp|P36969|GPX4_HUMAN Phospholipid hydroperoxide glutathione peroxidase OS=Homo sapiens OX=9606 GN=GPX4 PE=1 SV=3;tr|K7ERP4|K7ERP4_HUMAN Glutathione peroxidase (Fragment) OS=Homo sapiens OX=9606 GN=GPX4 PE=1 SV=1;tr|A0A087X2I2|A0A087X2I2_HUMAN Glutathione p	11	8	8	8	0	0	0	0	0	0	6	0	3	5	6	3	0	0	0	0	0	0	6	0	3	5	6	3	0	0	0	0	0	0	6	0	3	5	6	3	45.2
32	Q9NV06;A0A087WT20;A0A087X1F8;B3KME9;E5RHM4	Q9NV06;A0A087WT20;A0A087X1F8;B3KME9	4;4;2;2;1	4;4;2;2;1	4;4;2;2;1	DDB1- and CUL4-associated factor 13	DCAF13	sp|Q9NV06|DCA13_HUMAN DDB1- and CUL4-associated factor 13 OS=Homo sapiens OX=9606 GN=DCAF13 PE=1 SV=2;tr|A0A087WT20|A0A087WT20_HUMAN DDB1- and CUL4-associated factor 13 OS=Homo sapiens OX=9606 GN=DCAF13 PE=1 SV=1;tr|A0A087X1F8|A0A087X1F8_HUMAN DDB1- and CU	5	4	4	4	0	2	0	4	0	2	0	0	0	0	0	0	0	2	0	4	0	2	0	0	0	0	0	0	0	2	0	4	0	2	0	0	0	0	0	0	8.3
33	Q9BXF3;A0A087WT21;Q9BXF3-3;A0A0R4J2E1;B7WPH3;Q9BXF3-2	Q9BXF3;A0A087WT21;Q9BXF3-3;A0A0R4J2E1;B7WPH3	13;13;13;11;10;4	13;13;13;11;10;4	13;13;13;11;10;4	Cat eye syndrome critical region protein 2	CECR2	sp|Q9BXF3|CECR2_HUMAN Cat eye syndrome critical region protein 2 OS=Homo sapiens OX=9606 GN=CECR2 PE=1 SV=2;tr|A0A087WT21|A0A087WT21_HUMAN Cat eye syndrome critical region protein 2 OS=Homo sapiens OX=9606 GN=CECR2 PE=1 SV=1;sp|Q9BXF3-3|CECR2_HUMAN Isoform	6	13	13	13	3	5	0	7	0	12	0	0	0	0	0	0	3	5	0	7	0	12	0	0	0	0	0	0	3	5	0	7	0	12	0	0	0	0	0	0	20.9
34	Q96I51;A0A087WT38;Q96I51-2;Q96I51-3	Q96I51;A0A087WT38;Q96I51-2;Q96I51-3	1;1;1;1	1;1;1;1	1;1;1;1	Williams-Beuren syndrome chromosomal region 16 protein	WBSCR16	sp|Q96I51|RCC1L_HUMAN RCC1-like G exchanging factor-like protein OS=Homo sapiens OX=9606 GN=RCC1L PE=1 SV=2;tr|A0A087WT38|A0A087WT38_HUMAN RCC1-like G exchanging factor-like protein (Fragment) OS=Homo sapiens OX=9606 GN=RCC1L PE=1 SV=1;sp|Q96I51-2|RCC1L_HU	4	1	1	1	1	0	0	0	0	0	0	0	0	0	0	0	1	0	0	0	0	0	0	0	0	0	0	0	1	0	0	0	0	0	0	0	0	0	0	0	2.8
35	Q96QZ7;Q96QZ7-3;A0A087WXD2;H7C5T8;H7C4U7;H7C535;A0A087WT53;Q96QZ7-4;Q96QZ7-5;Q96QZ7-7;Q96QZ7-6;Q96QZ7-2	Q96QZ7;Q96QZ7-3;A0A087WXD2;H7C5T8;H7C4U7;H7C535;A0A087WT53;Q96QZ7-4;Q96QZ7-5;Q96QZ7-7;Q96QZ7-6;Q96QZ7-2	2;2;2;2;2;2;2;2;2;2;2;2	2;2;2;2;2;2;2;2;2;2;2;2	2;2;2;2;2;2;2;2;2;2;2;2	Membrane-associated guanylate kinase, WW and PDZ domain-containing protein 1	MAGI1	sp|Q96QZ7|MAGI1_HUMAN Membrane-associated guanylate kinase, WW and PDZ domain-containing protein 1 OS=Homo sapiens OX=9606 GN=MAGI1 PE=1 SV=3;sp|Q96QZ7-3|MAGI1_HUMAN Isoform 3 of Membrane-associated guanylate kinase, WW and PDZ domain-containing protein 1	12	2	2	2	0	1	1	0	0	0	0	0	0	0	0	0	0	1	1	0	0	0	0	0	0	0	0	0	0	1	1	0	0	0	0	0	0	0	0	0	3.1
36	A0A087WT67;O14628-7;O14628-6;O14628;E9PIY8;O14628-4;O14628-5;E9PLF5;E9PMX5;E9PNM0;O14628-8	A0A087WT67;O14628-7;O14628-6;O14628;E9PIY8;O14628-4;O14628-5	4;4;4;3;3;3;3;1;1;1;1	4;4;4;3;3;3;3;1;1;1;1	4;4;4;3;3;3;3;1;1;1;1	Zinc finger protein 195	ZNF195	tr|A0A087WT67|A0A087WT67_HUMAN Zinc finger protein 195 OS=Homo sapiens OX=9606 GN=ZNF195 PE=1 SV=1;sp|O14628-7|ZN195_HUMAN Isoform 7 of Zinc finger protein 195 OS=Homo sapiens OX=9606 GN=ZNF195;sp|O14628-6|ZN195_HUMAN Isoform 6 of Zinc finger protein 195 O	11	4	4	4	0	3	0	0	0	3	0	4	0	0	0	2	0	3	0	0	0	3	0	4	0	0	0	2	0	3	0	0	0	3	0	4	0	0	0	2	6.8
37	Q9UI10;Q9UI10-2;A0A087WTA5;E7ERK9;Q9UI10-3	Q9UI10;Q9UI10-2;A0A087WTA5;E7ERK9;Q9UI10-3	3;3;3;3;3	3;3;3;3;3	3;3;3;3;3	Translation initiation factor eIF-2B subunit delta	EIF2B4	sp|Q9UI10|EI2BD_HUMAN Translation initiation factor eIF-2B subunit delta OS=Homo sapiens OX=9606 GN=EIF2B4 PE=1 SV=2;sp|Q9UI10-2|EI2BD_HUMAN Isoform 2 of Translation initiation factor eIF-2B subunit delta OS=Homo sapiens OX=9606 GN=EIF2B4;tr|A0A087WTA5|A0A	5	3	3	3	0	0	1	0	0	0	0	0	2	0	0	0	0	0	1	0	0	0	0	0	2	0	0	0	0	0	1	0	0	0	0	0	2	0	0	0	10.3
38	Q9Y6N7;Q9Y6N7-4;A0A087WTM1;Q9Y6N7-5;Q9Y6N7-2;Q9Y6N7-3;A0A087WZ85;A0A0A0MSX4;Q9Y6N7-6;H7C4Y7;Q9HCK4-2;Q9HCK4;F8W703;F8WBR3;R4GMM8;Q9HCK4-3;H7C545	Q9Y6N7;Q9Y6N7-4;A0A087WTM1;Q9Y6N7-5;Q9Y6N7-2;Q9Y6N7-3;A0A087WZ85;A0A0A0MSX4;Q9Y6N7-6	19;19;19;19;19;19;18;18;17;3;1;1;1;1;1;1;1	19;19;19;19;19;19;18;18;17;3;1;1;1;1;1;1;1	19;19;19;19;19;19;18;18;17;3;1;1;1;1;1;1;1	Roundabout homolog 1	ROBO1	sp|Q9Y6N7|ROBO1_HUMAN Roundabout homolog 1 OS=Homo sapiens OX=9606 GN=ROBO1 PE=1 SV=1;sp|Q9Y6N7-4|ROBO1_HUMAN Isoform 4 of Roundabout homolog 1 OS=Homo sapiens OX=9606 GN=ROBO1;tr|A0A087WTM1|A0A087WTM1_HUMAN Roundabout homolog 1 OS=Homo sapiens OX=9606 GN=	17	19	19	19	0	0	0	0	9	0	0	0	2	0	16	0	0	0	0	0	9	0	0	0	2	0	16	0	0	0	0	0	9	0	0	0	2	0	16	0	17
39	Q969K3;A0A087WTM5;H7BYJ1;Q969K3-2	Q969K3;A0A087WTM5;H7BYJ1;Q969K3-2	1;1;1;1	1;1;1;1	1;1;1;1	E3 ubiquitin-protein ligase RNF34	RNF34	sp|Q969K3|RNF34_HUMAN E3 ubiquitin-protein ligase RNF34 OS=Homo sapiens OX=9606 GN=RNF34 PE=1 SV=1;tr|A0A087WTM5|A0A087WTM5_HUMAN E3 ubiquitin-protein ligase RNF34 OS=Homo sapiens OX=9606 GN=RNF34 PE=1 SV=1;tr|H7BYJ1|H7BYJ1_HUMAN E3 ubiquitin-protein ligas	4	1	1	1	0	0	0	0	0	0	0	0	1	0	0	0	0	0	0	0	0	0	0	0	1	0	0	0	0	0	0	0	0	0	0	0	1	0	0	0	3.5
40	Q9Y6I9;A0A087WTU3;C9JL43;C9JUC3;C9J7N0;C9JXQ7;C9JHH5	Q9Y6I9;A0A087WTU3;C9JL43;C9JUC3;C9J7N0;C9JXQ7;C9JHH5	2;2;1;1;1;1;1	2;2;1;1;1;1;1	2;2;1;1;1;1;1	Testis-expressed sequence 264 protein	TEX264	sp|Q9Y6I9|TX264_HUMAN Testis-expressed protein 264 OS=Homo sapiens OX=9606 GN=TEX264 PE=1 SV=1;tr|A0A087WTU3|A0A087WTU3_HUMAN Testis-expressed protein 264 OS=Homo sapiens OX=9606 GN=TEX264 PE=1 SV=1;tr|C9JL43|C9JL43_HUMAN Testis-expressed protein 264 (Frag	7	2	2	2	0	0	2	0	0	0	0	0	0	0	0	0	0	0	2	0	0	0	0	0	0	0	0	0	0	0	2	0	0	0	0	0	0	0	0	0	7.3
41	Q8TCU4;A0A494C0F1;A0A087WTU9;Q8TCU4-2	Q8TCU4;A0A494C0F1;A0A087WTU9;Q8TCU4-2	1;1;1;1	1;1;1;1	1;1;1;1	Alstrom syndrome protein 1	ALMS1	sp|Q8TCU4|ALMS1_HUMAN Alstrom syndrome protein 1 OS=Homo sapiens OX=9606 GN=ALMS1 PE=1 SV=4;tr|A0A494C0F1|A0A494C0F1_HUMAN Alstrom syndrome protein 1 (Fragment) OS=Homo sapiens OX=9606 GN=ALMS1 PE=1 SV=1;tr|A0A087WTU9|A0A087WTU9_HUMAN Alstrom syndrome prot	4	1	1	1	1	0	0	0	0	0	0	0	0	0	0	0	1	0	0	0	0	0	0	0	0	0	0	0	1	0	0	0	0	0	0	0	0	0	0	0	0.2
42	Q96C36;A0A087WTV6;J3KR12;A0A087WZR9;A0A087WX69;A0A087WZF0	Q96C36;A0A087WTV6;J3KR12;A0A087WZR9	6;6;5;3;1;1	5;5;4;2;1;1	5;5;4;2;1;1	Pyrroline-5-carboxylate reductase 2;Pyrroline-5-carboxylate reductase	PYCR2	sp|Q96C36|P5CR2_HUMAN Pyrroline-5-carboxylate reductase 2 OS=Homo sapiens OX=9606 GN=PYCR2 PE=1 SV=1;tr|A0A087WTV6|A0A087WTV6_HUMAN Pyrroline-5-carboxylate reductase OS=Homo sapiens OX=9606 GN=PYCR2 PE=1 SV=1;tr|J3KR12|J3KR12_HUMAN Pyrroline-5-carboxylate	6	6	5	5	1	0	4	0	1	0	1	0	4	0	0	0	1	0	4	0	1	0	1	0	3	0	0	0	1	0	4	0	1	0	1	0	3	0	0	0	35.9
43	Q96T88;Q96T88-2;A0A087WVR3;A0A087WTW0;A0A087WWG9	Q96T88;Q96T88-2;A0A087WVR3;A0A087WTW0;A0A087WWG9	17;17;17;17;11	17;17;17;17;11	16;16;16;16;10	E3 ubiquitin-protein ligase UHRF1	UHRF1	sp|Q96T88|UHRF1_HUMAN E3 ubiquitin-protein ligase UHRF1 OS=Homo sapiens OX=9606 GN=UHRF1 PE=1 SV=1;sp|Q96T88-2|UHRF1_HUMAN Isoform 2 of E3 ubiquitin-protein ligase UHRF1 OS=Homo sapiens OX=9606 GN=UHRF1;tr|A0A087WVR3|A0A087WVR3_HUMAN RING-type E3 ubiquitin	5	17	17	16	0	1	0	2	0	1	0	9	0	13	0	7	0	1	0	2	0	1	0	9	0	13	0	7	0	1	0	2	0	1	0	8	0	13	0	6	27.6
44	Q9Y605;A0A087WTY9	Q9Y605;A0A087WTY9	1;1	1;1	1;1	MORF4 family-associated protein 1	MRFAP1	sp|Q9Y605|MOFA1_HUMAN MORF4 family-associated protein 1 OS=Homo sapiens OX=9606 GN=MRFAP1 PE=1 SV=1;tr|A0A087WTY9|A0A087WTY9_HUMAN MORF4 family-associated protein 1 OS=Homo sapiens OX=9606 GN=MRFAP1 PE=1 SV=1	2	1	1	1	0	0	1	0	0	0	0	0	0	0	0	0	0	0	1	0	0	0	0	0	0	0	0	0	0	0	1	0	0	0	0	0	0	0	0	0	18.9
45	Q96RQ1;A0A087WU02;H0YI58;H0YI50;H0YHS0;H0YHJ8;F8W0R1;F8VR88;F8VUZ2;F8VPA6	Q96RQ1;A0A087WU02;H0YI58;H0YI50	5;5;4;4;1;1;1;1;1;1	5;5;4;4;1;1;1;1;1;1	5;5;4;4;1;1;1;1;1;1	Endoplasmic reticulum-Golgi intermediate compartment protein 2	ERGIC2	sp|Q96RQ1|ERGI2_HUMAN Endoplasmic reticulum-Golgi intermediate compartment protein 2 OS=Homo sapiens OX=9606 GN=ERGIC2 PE=1 SV=2;tr|A0A087WU02|A0A087WU02_HUMAN Endoplasmic reticulum-Golgi intermediate compartment protein 2 OS=Homo sapiens OX=9606 GN=ERGIC2	10	5	5	5	0	0	4	0	1	0	0	0	0	0	0	0	0	0	4	0	1	0	0	0	0	0	0	0	0	0	4	0	1	0	0	0	0	0	0	0	22.3
46	Q9H0U3;A0A087WU53;Q9H0U3-2	Q9H0U3;A0A087WU53	6;6;2	6;6;2	6;6;2	Magnesium transporter protein 1	MAGT1	sp|Q9H0U3|MAGT1_HUMAN Magnesium transporter protein 1 OS=Homo sapiens OX=9606 GN=MAGT1 PE=1 SV=1;tr|A0A087WU53|A0A087WU53_HUMAN Dolichyl-diphosphooligosaccharide--protein glycosyltransferase subunit MAGT1 OS=Homo sapiens OX=9606 GN=MAGT1 PE=1 SV=1	3	6	6	6	2	0	5	0	0	0	0	0	2	0	1	0	2	0	5	0	0	0	0	0	2	0	1	0	2	0	5	0	0	0	0	0	2	0	1	0	18.8
47	Q9NRW7;A0A087WU65;A0A2R8YE10;B7Z7G7;A0A2R8YF01;A0A1B0GXI6;A0A2R8YD95;Q9NRW7-2	Q9NRW7;A0A087WU65;A0A2R8YE10;B7Z7G7;A0A2R8YF01;A0A1B0GXI6;A0A2R8YD95;Q9NRW7-2	2;2;2;1;1;1;1;1	2;2;2;1;1;1;1;1	2;2;2;1;1;1;1;1	Vacuolar protein sorting-associated protein 45	VPS45	sp|Q9NRW7|VPS45_HUMAN Vacuolar protein sorting-associated protein 45 OS=Homo sapiens OX=9606 GN=VPS45 PE=1 SV=1;tr|A0A087WU65|A0A087WU65_HUMAN Vacuolar protein sorting-associated protein 45 OS=Homo sapiens OX=9606 GN=VPS45 PE=1 SV=1;tr|A0A2R8YE10|A0A2R8YE1	8	2	2	2	0	0	2	0	0	0	0	0	0	0	0	0	0	0	2	0	0	0	0	0	0	0	0	0	0	0	2	0	0	0	0	0	0	0	0	0	4.6
48	P21580;A0A087WXL5;A0A087X1N1;D3TTY5;A0A087WU80;A0A087WVN3;Q5VXQ8;Q5VXQ9;Q5VXR0	P21580;A0A087WXL5;A0A087X1N1;D3TTY5;A0A087WU80	11;11;11;11;11;5;4;3;1	11;11;11;11;11;5;4;3;1	11;11;11;11;11;5;4;3;1	Tumor necrosis factor alpha-induced protein 3;A20p50;A20p37	TNFAIP3	sp|P21580|TNAP3_HUMAN Tumor necrosis factor alpha-induced protein 3 OS=Homo sapiens OX=9606 GN=TNFAIP3 PE=1 SV=1;tr|A0A087WXL5|A0A087WXL5_HUMAN Ubiquitinyl hydrolase 1 OS=Homo sapiens OX=9606 GN=TNFAIP3 PE=1 SV=2;tr|A0A087X1N1|A0A087X1N1_HUMAN Ubiquitinyl	9	11	11	11	5	0	0	0	7	1	8	0	0	0	2	0	5	0	0	0	7	1	8	0	0	0	2	0	5	0	0	0	7	1	8	0	0	0	2	0	16.6
49	Q8WYA6;A0A087WUB9;Q8WYA6-4;Q8WYA6-3;Q8WYA6-2;A2A2P1	Q8WYA6;A0A087WUB9;Q8WYA6-4;Q8WYA6-3;Q8WYA6-2	14;14;13;10;10;3	14;14;13;10;10;3	14;14;13;10;10;3	Beta-catenin-like protein 1	CTNNBL1	sp|Q8WYA6|CTBL1_HUMAN Beta-catenin-like protein 1 OS=Homo sapiens OX=9606 GN=CTNNBL1 PE=1 SV=1;tr|A0A087WUB9|A0A087WUB9_HUMAN Beta-catenin-like protein 1 OS=Homo sapiens OX=9606 GN=CTNNBL1 PE=1 SV=1;sp|Q8WYA6-4|CTBL1_HUMAN Isoform 4 of Beta-catenin-like pr	6	14	14	14	0	0	13	1	0	0	0	0	7	0	1	0	0	0	13	1	0	0	0	0	7	0	1	0	0	0	13	1	0	0	0	0	7	0	1	0	30.9
50	Q15005;A0A087WUC6;E9PI68;E9PL01;E9PRB9;H0YE04	Q15005;A0A087WUC6;E9PI68;E9PL01;E9PRB9	9;9;9;8;6;2	9;9;9;8;6;2	9;9;9;8;6;2	Signal peptidase complex subunit 2	SPCS2	sp|Q15005|SPCS2_HUMAN Signal peptidase complex subunit 2 OS=Homo sapiens OX=9606 GN=SPCS2 PE=1 SV=3;tr|A0A087WUC6|A0A087WUC6_HUMAN Microsomal signal peptidase 25 kDa subunit OS=Homo sapiens OX=9606 GN=SPCS2 PE=1 SV=1;tr|E9PI68|E9PI68_HUMAN Microsomal signa	6	9	9	9	1	2	6	0	1	1	1	0	2	2	1	2	1	2	6	0	1	1	1	0	2	2	1	2	1	2	6	0	1	1	1	0	2	2	1	2	33.6
51	Q9NRP0;A0A087WUD3;Q9NRP0-2	Q9NRP0;A0A087WUD3;Q9NRP0-2	2;2;2	2;2;2	2;2;2	Oligosaccharyltransferase complex subunit OSTC	OSTC	sp|Q9NRP0|OSTC_HUMAN Oligosaccharyltransferase complex subunit OSTC OS=Homo sapiens OX=9606 GN=OSTC PE=1 SV=1;tr|A0A087WUD3|A0A087WUD3_HUMAN Oligosaccharyltransferase complex subunit OS=Homo sapiens OX=9606 GN=OSTC PE=1 SV=1;sp|Q9NRP0-2|OSTC_HUMAN Isoform	3	2	2	2	0	0	2	0	0	0	0	0	1	0	0	0	0	0	2	0	0	0	0	0	1	0	0	0	0	0	2	0	0	0	0	0	1	0	0	0	13.4
52	O14979;A0A087WUK2	O14979;A0A087WUK2	8;8	1;1	1;1	Heterogeneous nuclear ribonucleoprotein D-like	HNRNPDL	sp|O14979|HNRDL_HUMAN Heterogeneous nuclear ribonucleoprotein D-like OS=Homo sapiens OX=9606 GN=HNRNPDL PE=1 SV=3;tr|A0A087WUK2|A0A087WUK2_HUMAN Heterogeneous nuclear ribonucleoprotein D-like OS=Homo sapiens OX=9606 GN=HNRNPDL PE=1 SV=1	2	8	1	1	1	6	1	7	1	6	1	5	1	5	0	4	0	0	0	1	0	0	0	0	0	0	0	1	0	0	0	1	0	0	0	0	0	0	0	1	21.7
53	Q86TG7;A0A087WXK2;A0A087WUL4;A0A087WX23;Q86TG7-2;A0A087WZG9;B4DSP0;A0A087WYS2	Q86TG7;A0A087WXK2;A0A087WUL4;A0A087WX23;Q86TG7-2;A0A087WZG9;B4DSP0	15;15;15;15;10;10;10;1	15;15;15;15;10;10;10;1	15;15;15;15;10;10;10;1	Retrotransposon-derived protein PEG10	PEG10	sp|Q86TG7|PEG10_HUMAN Retrotransposon-derived protein PEG10 OS=Homo sapiens OX=9606 GN=PEG10 PE=1 SV=2;tr|A0A087WXK2|A0A087WXK2_HUMAN Retrotransposon-derived protein PEG10 OS=Homo sapiens OX=9606 GN=PEG10 PE=1 SV=1;tr|A0A087WUL4|A0A087WUL4_HUMAN Retrotrans	8	15	15	15	5	1	11	1	8	2	0	0	0	0	0	0	5	1	11	1	8	2	0	0	0	0	0	0	5	1	11	1	8	2	0	0	0	0	0	0	40.4
54	Q9UNM6;E9PQG3;E9PL38;J3KNQ3;A0A087WUL9;Q9UNM6-2	Q9UNM6;E9PQG3;E9PL38;J3KNQ3;A0A087WUL9;Q9UNM6-2	1;1;1;1;1;1	1;1;1;1;1;1	1;1;1;1;1;1	26S proteasome non-ATPase regulatory subunit 13	PSMD13	sp|Q9UNM6|PSD13_HUMAN 26S proteasome non-ATPase regulatory subunit 13 OS=Homo sapiens OX=9606 GN=PSMD13 PE=1 SV=2;tr|E9PQG3|E9PQG3_HUMAN 26S proteasome non-ATPase regulatory subunit 13 OS=Homo sapiens OX=9606 GN=PSMD13 PE=1 SV=1;tr|E9PL38|E9PL38_HUMAN 26S	6	1	1	1	1	0	1	0	1	0	0	0	1	0	0	0	1	0	1	0	1	0	0	0	1	0	0	0	1	0	1	0	1	0	0	0	1	0	0	0	4
55	Q9GZT3;A0A087WUN7;H0YJ40;G3V4X6;G3V2S9;Q9GZT3-2;H0YJW7;H0YJI1;H0YJ07;H0YJU7	Q9GZT3;A0A087WUN7;H0YJ40;G3V4X6;G3V2S9;Q9GZT3-2;H0YJW7	3;3;3;3;3;3;2;1;1;1	3;3;3;3;3;3;2;1;1;1	3;3;3;3;3;3;2;1;1;1	SRA stem-loop-interacting RNA-binding protein, mitochondrial	SLIRP	sp|Q9GZT3|SLIRP_HUMAN SRA stem-loop-interacting RNA-binding protein, mitochondrial OS=Homo sapiens OX=9606 GN=SLIRP PE=1 SV=1;tr|A0A087WUN7|A0A087WUN7_HUMAN SRA stem-loop-interacting RNA-binding protein, mitochondrial OS=Homo sapiens OX=9606 GN=SLIRP PE=1	10	3	3	3	0	0	3	0	0	0	0	0	0	0	0	0	0	0	3	0	0	0	0	0	0	0	0	0	0	0	3	0	0	0	0	0	0	0	0	0	32.1
56	O60841;A0A087WUT6	O60841;A0A087WUT6	47;47	47;47	47;47	Eukaryotic translation initiation factor 5B	EIF5B	sp|O60841|IF2P_HUMAN Eukaryotic translation initiation factor 5B OS=Homo sapiens OX=9606 GN=EIF5B PE=1 SV=4;tr|A0A087WUT6|A0A087WUT6_HUMAN Eukaryotic translation initiation factor 5B OS=Homo sapiens OX=9606 GN=EIF5B PE=1 SV=1	2	47	47	47	0	0	44	0	1	0	0	1	27	0	0	0	0	0	44	0	1	0	0	1	27	0	0	0	0	0	44	0	1	0	0	1	27	0	0	0	48.5
57	Q96GX5;Q96GX5-2;A0A087WUU7;Q96GX5-3	Q96GX5;Q96GX5-2;A0A087WUU7;Q96GX5-3	1;1;1;1	1;1;1;1	1;1;1;1	Serine/threonine-protein kinase greatwall	MASTL	sp|Q96GX5|GWL_HUMAN Serine/threonine-protein kinase greatwall OS=Homo sapiens OX=9606 GN=MASTL PE=1 SV=1;sp|Q96GX5-2|GWL_HUMAN Isoform 2 of Serine/threonine-protein kinase greatwall OS=Homo sapiens OX=9606 GN=MASTL;tr|A0A087WUU7|A0A087WUU7_HUMAN Serine/thr	4	1	1	1	0	0	0	0	1	0	0	0	0	0	0	0	0	0	0	0	1	0	0	0	0	0	0	0	0	0	0	0	1	0	0	0	0	0	0	0	1.8
58	Q9Y6K9;A0A087X0G7;A0A087WUW6;A0A087X1B1;Q9Y6K9-2;Q9Y6K9-3;A0A087WV30;C9JH59;C9J2V2;C9JN51	Q9Y6K9;A0A087X0G7;A0A087WUW6;A0A087X1B1;Q9Y6K9-2;Q9Y6K9-3	3;3;3;3;3;2;1;1;1;1	3;3;3;3;3;2;1;1;1;1	3;3;3;3;3;2;1;1;1;1	NF-kappa-B essential modulator	IKBKG	sp|Q9Y6K9|NEMO_HUMAN NF-kappa-B essential modulator OS=Homo sapiens OX=9606 GN=IKBKG PE=1 SV=2;tr|A0A087X0G7|A0A087X0G7_HUMAN NF-kappa-B essential modulator OS=Homo sapiens OX=9606 GN=IKBKG PE=1 SV=1;tr|A0A087WUW6|A0A087WUW6_HUMAN NF-kappa-B essential modu	10	3	3	3	0	0	2	0	1	0	0	0	1	0	2	0	0	0	2	0	1	0	0	0	1	0	2	0	0	0	2	0	1	0	0	0	1	0	2	0	9.8
59	O95684;O95684-2;A0A087WV25;Q8N103-3	O95684;O95684-2;A0A087WV25;Q8N103-3	1;1;1;1	1;1;1;1	1;1;1;1	FGFR1 oncogene partner	FGFR1OP	sp|O95684|CEP43_HUMAN Centrosomal protein 43 OS=Homo sapiens OX=9606 GN=CEP43 PE=1 SV=1;sp|O95684-2|CEP43_HUMAN Isoform 2 of Centrosomal protein 43 OS=Homo sapiens OX=9606 GN=CEP43;tr|A0A087WV25|A0A087WV25_HUMAN Centrosomal protein 43 OS=Homo sapiens OX=96	4	1	1	1	0	0	1	0	0	0	0	0	0	0	0	0	0	0	1	0	0	0	0	0	0	0	0	0	0	0	1	0	0	0	0	0	0	0	0	0	7.8
60	P22694;B1APF9;A0A0A0MS54;B1APG1;B1APG3;A0A087WVC4;B1APF8;B1APG2;B1APG0;B1APF7;P22694-2;P22694-4;P22694-3;P22694-5;P22694-7;P22694-6;P22694-9;P22694-8;P22694-10	P22694;B1APF9;A0A0A0MS54;B1APG1;B1APG3;A0A087WVC4;B1APF8;B1APG2;B1APG0;B1APF7;P22694-2;P22694-4;P22694-3;P22694-5;P22694-7;P22694-6;P22694-9;P22694-8;P22694-10	2;2;2;2;2;2;2;2;2;2;2;2;2;2;2;2;2;2;1	1;1;1;1;1;1;1;1;1;1;1;1;1;1;1;1;1;1;0	1;1;1;1;1;1;1;1;1;1;1;1;1;1;1;1;1;1;0	cAMP-dependent protein kinase catalytic subunit beta	PRKACB	sp|P22694|KAPCB_HUMAN cAMP-dependent protein kinase catalytic subunit beta OS=Homo sapiens OX=9606 GN=PRKACB PE=1 SV=2;tr|B1APF9|B1APF9_HUMAN cAMP-dependent protein kinase catalytic subunit beta OS=Homo sapiens OX=9606 GN=PRKACB PE=1 SV=1;tr|A0A0A0MS54|A0A	19	2	1	1	0	0	1	0	1	0	0	0	1	0	0	0	0	0	1	0	1	0	0	0	0	0	0	0	0	0	1	0	1	0	0	0	0	0	0	0	9.7
61	A0A087WVD1	A0A087WVD1	1	1	1		LENG9	tr|A0A087WVD1|A0A087WVD1_HUMAN Leukocyte receptor cluster member 9 OS=Homo sapiens OX=9606 GN=LENG9 PE=1 SV=1	1	1	1	1	0	0	1	0	0	0	0	0	0	0	0	0	0	0	1	0	0	0	0	0	0	0	0	0	0	0	1	0	0	0	0	0	0	0	0	0	3.1
62	Q6UB35;A0A087WVM4;B7ZM99;H0Y327;Q4VXM1;Q4VXM0;Q5JYA8;Q5JYA3;Q6UB35-2	Q6UB35;A0A087WVM4;B7ZM99	6;6;6;2;1;1;1;1;1	6;6;6;2;1;1;1;1;1	6;6;6;2;1;1;1;1;1	Monofunctional C1-tetrahydrofolate synthase, mitochondrial	MTHFD1L	sp|Q6UB35|C1TM_HUMAN Monofunctional C1-tetrahydrofolate synthase, mitochondrial OS=Homo sapiens OX=9606 GN=MTHFD1L PE=1 SV=1;tr|A0A087WVM4|A0A087WVM4_HUMAN Formyltetrahydrofolate synthetase OS=Homo sapiens OX=9606 GN=MTHFD1L PE=1 SV=1;tr|B7ZM99|B7ZM99_HUMA	9	6	6	6	0	0	0	0	2	0	3	0	0	0	3	0	0	0	0	0	2	0	3	0	0	0	3	0	0	0	0	0	2	0	3	0	0	0	3	0	7.8
63	Q14517;A0A087WVP1;H0Y9H4;D6RCE4;H0Y9C8;H0Y8F5	Q14517;A0A087WVP1	20;20;4;3;2;1	20;20;4;3;2;1	20;20;4;3;2;1	Protocadherin Fat 1;Protocadherin Fat 1, nuclear form	FAT1	sp|Q14517|FAT1_HUMAN Protocadherin Fat 1 OS=Homo sapiens OX=9606 GN=FAT1 PE=1 SV=2;tr|A0A087WVP1|A0A087WVP1_HUMAN Protocadherin Fat 1 OS=Homo sapiens OX=9606 GN=FAT1 PE=1 SV=1	6	20	20	20	0	0	0	0	11	0	0	0	1	1	11	0	0	0	0	0	11	0	0	0	1	1	11	0	0	0	0	0	11	0	0	0	1	1	11	0	7.8
64	Q00610;A0A087WVQ6;Q00610-2;J3KS13;K7EJJ5;J3KSQ2;J3QL20;J3KRF5;F5H5N6;A0A087WV74;A0A087WXH4	Q00610;A0A087WVQ6;Q00610-2	98;98;98;32;10;8;6;5;1;1;1	98;98;98;32;10;8;6;5;1;1;1	79;79;79;30;10;7;6;5;0;0;0	Clathrin heavy chain 1;Clathrin heavy chain	CLTC	sp|Q00610|CLH1_HUMAN Clathrin heavy chain 1 OS=Homo sapiens OX=9606 GN=CLTC PE=1 SV=5;tr|A0A087WVQ6|A0A087WVQ6_HUMAN Clathrin heavy chain OS=Homo sapiens OX=9606 GN=CLTC PE=1 SV=1;sp|Q00610-2|CLH1_HUMAN Isoform 2 of Clathrin heavy chain 1 OS=Homo sapiens O	11	98	98	79	67	51	41	66	82	60	67	21	67	55	78	39	67	51	41	66	82	60	67	21	67	55	78	39	55	42	33	56	65	51	53	16	53	46	66	31	74
65	Q9BWW4;A0A087WVT6;Q9BWW4-2;Q9BWW4-3;P81877;D6RAC5;A0A087X159;P81877-2;P81877-4;P81877-5;P81877-3;Q9BWG4;U3KQ46;Q9NW25;Q9BWG4-2	Q9BWW4;A0A087WVT6;Q9BWW4-2;Q9BWW4-3;P81877;D6RAC5;A0A087X159;P81877-2;P81877-4;P81877-5;P81877-3	3;3;3;3;2;2;2;2;2;2;2;1;1;1;1	3;3;3;3;2;2;2;2;2;2;2;1;1;1;1	3;3;3;3;2;2;2;2;2;2;2;1;1;1;1	Single-stranded DNA-binding protein 3;Single-stranded DNA-binding protein 2	SSBP3;SSBP2	sp|Q9BWW4|SSBP3_HUMAN Single-stranded DNA-binding protein 3 OS=Homo sapiens OX=9606 GN=SSBP3 PE=1 SV=1;tr|A0A087WVT6|A0A087WVT6_HUMAN Single-stranded DNA-binding protein 3 OS=Homo sapiens OX=9606 GN=SSBP3 PE=1 SV=1;sp|Q9BWW4-2|SSBP3_HUMAN Isoform 2 of Sing	15	3	3	3	2	0	2	2	2	0	2	1	0	2	3	2	2	0	2	2	2	0	2	1	0	2	3	2	2	0	2	2	2	0	2	1	0	2	3	2	11.1
66	P49721;A0A087WVV1	P49721;A0A087WVV1	2;2	2;2	2;2	Proteasome subunit beta type-2	PSMB2	sp|P49721|PSB2_HUMAN Proteasome subunit beta type-2 OS=Homo sapiens OX=9606 GN=PSMB2 PE=1 SV=1;tr|A0A087WVV1|A0A087WVV1_HUMAN Proteasome endopeptidase complex OS=Homo sapiens OX=9606 GN=PSMB2 PE=1 SV=1	2	2	2	2	0	0	1	0	1	0	0	0	1	0	0	0	0	0	1	0	1	0	0	0	1	0	0	0	0	0	1	0	1	0	0	0	1	0	0	0	14.9
67	Q9C0H9;A0A087WVV7;A0A590UJ70;A0A087X165;Q9C0H9-2	Q9C0H9;A0A087WVV7;A0A590UJ70;A0A087X165;Q9C0H9-2	1;1;1;1;1	1;1;1;1;1	1;1;1;1;1	SRC kinase signaling inhibitor 1	SRCIN1	sp|Q9C0H9|SRCN1_HUMAN SRC kinase signaling inhibitor 1 OS=Homo sapiens OX=9606 GN=SRCIN1 PE=1 SV=4;tr|A0A087WVV7|A0A087WVV7_HUMAN SRC kinase-signaling inhibitor 1 (Fragment) OS=Homo sapiens OX=9606 GN=SRCIN1 PE=1 SV=1;tr|A0A590UJ70|A0A590UJ70_HUMAN SRC kin	5	1	1	1	0	0	1	0	0	0	0	0	0	0	0	0	0	0	1	0	0	0	0	0	0	0	0	0	0	0	1	0	0	0	0	0	0	0	0	0	1.6
68	P19388;A0A087WVZ9;A0A0A0MQR7;A0A087WWX0;A0A087WVN5	P19388;A0A087WVZ9;A0A0A0MQR7;A0A087WWX0	3;3;3;2;1	3;3;3;2;1	3;3;3;2;1	DNA-directed RNA polymerases I, II, and III subunit RPABC1	POLR2E	sp|P19388|RPAB1_HUMAN DNA-directed RNA polymerases I, II, and III subunit RPABC1 OS=Homo sapiens OX=9606 GN=POLR2E PE=1 SV=4;tr|A0A087WVZ9|A0A087WVZ9_HUMAN DNA-directed RNA polymerase II subunit E OS=Homo sapiens OX=9606 GN=POLR2E PE=1 SV=1;tr|A0A0A0MQR7|A	5	3	3	3	0	0	1	0	3	0	1	0	1	0	0	0	0	0	1	0	3	0	1	0	1	0	0	0	0	0	1	0	3	0	1	0	1	0	0	0	23.8
69	P61077;P62837;Q9Y2X8;P51668;P61077-3;D6RAW0;D6RA11;D6RFM0;A0A087WW00;D6RAH7;C9J9H9;H9KV45;A0A0A0MQU3;A0A087WY85;P62837-2;P61077-2	P61077;P62837;Q9Y2X8;P51668;P61077-3;D6RAW0;D6RA11;D6RFM0;A0A087WW00;D6RAH7;C9J9H9;H9KV45;A0A0A0MQU3;A0A087WY85;P62837-2;P61077-2	1;1;1;1;1;1;1;1;1;1;1;1;1;1;1;1	1;1;1;1;1;1;1;1;1;1;1;1;1;1;1;1	1;1;1;1;1;1;1;1;1;1;1;1;1;1;1;1	Ubiquitin-conjugating enzyme E2 D3;Ubiquitin-conjugating enzyme E2 D2;Ubiquitin-conjugating enzyme E2 D4;Ubiquitin-conjugating enzyme E2 D1	UBE2D3;UBE2D2;UBE2D4;UBE2D1	sp|P61077|UB2D3_HUMAN Ubiquitin-conjugating enzyme E2 D3 OS=Homo sapiens OX=9606 GN=UBE2D3 PE=1 SV=1;sp|P62837|UB2D2_HUMAN Ubiquitin-conjugating enzyme E2 D2 OS=Homo sapiens OX=9606 GN=UBE2D2 PE=1 SV=1;sp|Q9Y2X8|UB2D4_HUMAN Ubiquitin-conjugating enzyme E2	16	1	1	1	0	0	1	0	0	0	0	0	0	0	0	0	0	0	1	0	0	0	0	0	0	0	0	0	0	0	1	0	0	0	0	0	0	0	0	0	12.2
70	Q9C0D9;A0A087WW58;C9JAG1;C9JEZ2	Q9C0D9;A0A087WW58;C9JAG1	5;5;3;1	5;5;3;1	5;5;3;1	Ethanolaminephosphotransferase 1	EPT1	sp|Q9C0D9|EPT1_HUMAN Ethanolaminephosphotransferase 1 OS=Homo sapiens OX=9606 GN=SELENOI PE=1 SV=3;tr|A0A087WW58|A0A087WW58_HUMAN Ethanolaminephosphotransferase 1 OS=Homo sapiens OX=9606 GN=SELENOI PE=1 SV=1;tr|C9JAG1|C9JAG1_HUMAN Ethanolaminephosphotransf	4	5	5	5	0	0	4	0	0	0	0	0	3	0	0	0	0	0	4	0	0	0	0	0	3	0	0	0	0	0	4	0	0	0	0	0	3	0	0	0	20.4
71	Q5T5U3;A0A087WW76;A0A452Q6Z5;A0A1B0GV73;E7ESW5;Q5T5U3-3;A0A1B0GTZ9;Q5JSD8;H0Y468	Q5T5U3;A0A087WW76;A0A452Q6Z5;A0A1B0GV73	11;11;11;8;5;5;3;2;2	11;11;11;8;5;5;3;2;2	11;11;11;8;5;5;3;2;2	Rho GTPase-activating protein 21	ARHGAP21	sp|Q5T5U3|RHG21_HUMAN Rho GTPase-activating protein 21 OS=Homo sapiens OX=9606 GN=ARHGAP21 PE=1 SV=2;tr|A0A087WW76|A0A087WW76_HUMAN Rho GTPase-activating protein 21 OS=Homo sapiens OX=9606 GN=ARHGAP21 PE=1 SV=1;tr|A0A452Q6Z5|A0A452Q6Z5_HUMAN Rho GTPase-act	9	11	11	11	1	2	1	2	0	2	1	1	3	1	0	4	1	2	1	2	0	2	1	1	3	1	0	4	1	2	1	2	0	2	1	1	3	1	0	4	9.1
72	P49005;F8W8R3;A0A087WWF6;C9JLE1;C9JHC7;H7C1B3;C9IZD2;C9J8Z7	P49005;F8W8R3;A0A087WWF6;C9JLE1;C9JHC7	4;4;4;2;2;1;1;1	4;4;4;2;2;1;1;1	4;4;4;2;2;1;1;1	DNA polymerase delta subunit 2	POLD2	sp|P49005|DPOD2_HUMAN DNA polymerase delta subunit 2 OS=Homo sapiens OX=9606 GN=POLD2 PE=1 SV=1;tr|F8W8R3|F8W8R3_HUMAN DNA polymerase delta subunit 2 OS=Homo sapiens OX=9606 GN=POLD2 PE=1 SV=1;tr|A0A087WWF6|A0A087WWF6_HUMAN DNA polymerase delta subunit 2 O	8	4	4	4	1	0	0	0	1	0	4	0	1	0	2	0	1	0	0	0	1	0	4	0	1	0	2	0	1	0	0	0	1	0	4	0	1	0	2	0	12.2
73	Q96T37;A0A087WWP4;A0A499FJY3;Q96T37-4;Q96T37-2;Q96T37-3;A0A494C001	Q96T37;A0A087WWP4;A0A499FJY3;Q96T37-4;Q96T37-2;Q96T37-3;A0A494C001	35;35;34;34;34;34;32	35;35;34;34;34;34;32	34;34;33;33;33;33;31	Putative RNA-binding protein 15	RBM15	sp|Q96T37|RBM15_HUMAN RNA-binding protein 15 OS=Homo sapiens OX=9606 GN=RBM15 PE=1 SV=2;tr|A0A087WWP4|A0A087WWP4_HUMAN RNA-binding protein 15 OS=Homo sapiens OX=9606 GN=RBM15 PE=1 SV=1;tr|A0A499FJY3|A0A499FJY3_HUMAN RNA-binding protein 15 OS=Homo sapiens O	7	35	35	34	0	24	2	25	0	28	0	22	2	21	0	20	0	24	2	25	0	28	0	22	2	21	0	20	0	23	1	24	0	27	0	22	2	21	0	19	46
74	Q96FV9;A0A087WWS1;R4GMN4;Q96FV9-2;A0A087WY84;J3KRD7;J3QQZ3;J3KT14;R4GN58	Q96FV9;A0A087WWS1	11;11;5;4;3;2;2;2;1	11;11;5;4;3;2;2;2;1	11;11;5;4;3;2;2;2;1	THO complex subunit 1	THOC1	sp|Q96FV9|THOC1_HUMAN THO complex subunit 1 OS=Homo sapiens OX=9606 GN=THOC1 PE=1 SV=1;tr|A0A087WWS1|A0A087WWS1_HUMAN THO complex subunit 1 OS=Homo sapiens OX=9606 GN=THOC1 PE=1 SV=1	9	11	11	11	0	3	0	10	0	3	0	0	0	3	0	0	0	3	0	10	0	3	0	0	0	3	0	0	0	3	0	10	0	3	0	0	0	3	0	0	22.7
75	Q8TF40;Q9P278;D6RFH5;A0A087WX11;J3KNG8;Q9P278-2;Q8TF40-3	Q8TF40;Q9P278;D6RFH5;A0A087WX11;J3KNG8;Q9P278-2;Q8TF40-3	1;1;1;1;1;1;1	1;1;1;1;1;1;1	1;1;1;1;1;1;1	Folliculin-interacting protein 1;Folliculin-interacting protein 2	FNIP1;FNIP2	sp|Q8TF40|FNIP1_HUMAN Folliculin-interacting protein 1 OS=Homo sapiens OX=9606 GN=FNIP1 PE=1 SV=3;sp|Q9P278|FNIP2_HUMAN Folliculin-interacting protein 2 OS=Homo sapiens OX=9606 GN=FNIP2 PE=1 SV=2;tr|D6RFH5|D6RFH5_HUMAN Folliculin-interacting protein 2 (Fra	7	1	1	1	0	0	0	0	0	0	1	0	0	0	0	0	0	0	0	0	0	0	1	0	0	0	0	0	0	0	0	0	0	0	1	0	0	0	0	0	2
76	Q8N5Z5;H0Y731;A0A087WX35;Q8N5Z5-2;H7C323	Q8N5Z5;H0Y731;A0A087WX35;Q8N5Z5-2;H7C323	2;2;2;2;1	2;2;2;2;1	2;2;2;2;1	BTB/POZ domain-containing protein KCTD17	KCTD17	sp|Q8N5Z5|KCD17_HUMAN BTB/POZ domain-containing protein KCTD17 OS=Homo sapiens OX=9606 GN=KCTD17 PE=1 SV=3;tr|H0Y731|H0Y731_HUMAN BTB/POZ domain-containing protein KCTD17 (Fragment) OS=Homo sapiens OX=9606 GN=KCTD17 PE=1 SV=1;tr|A0A087WX35|A0A087WX35_HUMAN	5	2	2	2	0	0	0	0	1	0	0	0	0	0	1	0	0	0	0	0	1	0	0	0	0	0	1	0	0	0	0	0	1	0	0	0	0	0	1	0	12.8
77	Q16186;A0A087WX59;A0A087WUX6	Q16186;A0A087WX59;A0A087WUX6	2;2;1	2;2;1	2;2;1	Proteasomal ubiquitin receptor ADRM1	ADRM1	sp|Q16186|ADRM1_HUMAN Proteasomal ubiquitin receptor ADRM1 OS=Homo sapiens OX=9606 GN=ADRM1 PE=1 SV=2;tr|A0A087WX59|A0A087WX59_HUMAN Proteasomal ubiquitin receptor ADRM1 OS=Homo sapiens OX=9606 GN=ADRM1 PE=1 SV=1;tr|A0A087WUX6|A0A087WUX6_HUMAN Proteasomal	3	2	2	2	2	0	0	0	1	0	0	0	1	0	1	0	2	0	0	0	1	0	0	0	1	0	1	0	2	0	0	0	1	0	0	0	1	0	1	0	7.6
78	Q9BXK5;A0A087WX97;Q9BXK5-2	Q9BXK5;A0A087WX97;Q9BXK5-2	1;1;1	1;1;1	1;1;1	Bcl-2-like protein 13	BCL2L13	sp|Q9BXK5|B2L13_HUMAN Bcl-2-like protein 13 OS=Homo sapiens OX=9606 GN=BCL2L13 PE=1 SV=1;tr|A0A087WX97|A0A087WX97_HUMAN Bcl-2-like protein 13 OS=Homo sapiens OX=9606 GN=BCL2L13 PE=1 SV=1;sp|Q9BXK5-2|B2L13_HUMAN Isoform 1 of Bcl-2-like protein 13 OS=Homo sa	3	1	1	1	0	0	1	0	0	0	0	0	1	0	0	0	0	0	1	0	0	0	0	0	1	0	0	0	0	0	1	0	0	0	0	0	1	0	0	0	1.9
79	O95299;A0A087WXC5;E7ESZ7;O95299-2;C9J6X0;Q8N1B9;H7C2W5;H7C1Y7;H7C2X4	O95299;A0A087WXC5;E7ESZ7;O95299-2	15;15;15;12;7;6;4;4;4	15;15;15;12;7;6;4;4;4	15;15;15;12;7;6;4;4;4	NADH dehydrogenase [ubiquinone] 1 alpha subcomplex subunit 10, mitochondrial	NDUFA10	sp|O95299|NDUAA_HUMAN NADH dehydrogenase [ubiquinone] 1 alpha subcomplex subunit 10, mitochondrial OS=Homo sapiens OX=9606 GN=NDUFA10 PE=1 SV=1;tr|A0A087WXC5|A0A087WXC5_HUMAN NADH dehydrogenase [ubiquinone] 1 alpha subcomplex subunit 10, mitochondrial OS=H	9	15	15	15	5	1	12	4	3	2	1	1	7	1	1	1	5	1	12	4	3	2	1	1	7	1	1	1	5	1	12	4	3	2	1	1	7	1	1	1	57.2
80	Q9NP64;A0A087WYV3;A0A0D9SEW3;A0A087WXF8;Q9NP64-2;Q9NP64-3	Q9NP64;A0A087WYV3;A0A0D9SEW3;A0A087WXF8;Q9NP64-2;Q9NP64-3	2;2;2;2;2;2	2;2;2;2;2;2	2;2;2;2;2;2	Nucleolar protein of 40 kDa	ZCCHC17	sp|Q9NP64|NO40_HUMAN Nucleolar protein of 40 kDa OS=Homo sapiens OX=9606 GN=ZCCHC17 PE=1 SV=1;tr|A0A087WYV3|A0A087WYV3_HUMAN Nucleolar protein of 40 kDa OS=Homo sapiens OX=9606 GN=ZCCHC17 PE=1 SV=1;tr|A0A0D9SEW3|A0A0D9SEW3_HUMAN Nucleolar protein of 40 kDa	6	2	2	2	0	0	1	0	0	0	0	0	1	0	0	0	0	0	1	0	0	0	0	0	1	0	0	0	0	0	1	0	0	0	0	0	1	0	0	0	12.4
81	P12830;A0A087WXI5;P12830-2	P12830;A0A087WXI5;P12830-2	1;1;1	1;1;1	1;1;1	Cadherin-1;E-Cad/CTF1;E-Cad/CTF2;E-Cad/CTF3	CDH1	sp|P12830|CADH1_HUMAN Cadherin-1 OS=Homo sapiens OX=9606 GN=CDH1 PE=1 SV=3;tr|A0A087WXI5|A0A087WXI5_HUMAN Cadherin-1 OS=Homo sapiens OX=9606 GN=CDH1 PE=1 SV=1;sp|P12830-2|CADH1_HUMAN Isoform 2 of Cadherin-1 OS=Homo sapiens OX=9606 GN=CDH1	3	1	1	1	0	0	0	0	0	0	0	0	1	1	1	0	0	0	0	0	0	0	0	0	1	1	1	0	0	0	0	0	0	0	0	0	1	1	1	0	1.8
82	Q9H270;A0A087WXL6;B7Z879;A0A0G2JS92	Q9H270;A0A087WXL6;B7Z879;A0A0G2JS92	5;5;4;3	5;5;4;3	5;5;4;3	Vacuolar protein sorting-associated protein 11 homolog	VPS11	sp|Q9H270|VPS11_HUMAN Vacuolar protein sorting-associated protein 11 homolog OS=Homo sapiens OX=9606 GN=VPS11 PE=1 SV=1;tr|A0A087WXL6|A0A087WXL6_HUMAN Vacuolar protein sorting-associated protein 11 homolog OS=Homo sapiens OX=9606 GN=VPS11 PE=1 SV=1;tr|B7Z8	4	5	5	5	0	0	0	0	0	0	0	0	4	0	2	0	0	0	0	0	0	0	0	0	4	0	2	0	0	0	0	0	0	0	0	0	4	0	2	0	6.9
83	P18621;A0A087WXM6;J3QQT2;J3KRX5;A0A0A6YYL6;P18621-3;J3QLC8;A0A0A0MRF8;P18621-2;J3KRB3;A0A087WWH0;J3QS96;A0A087WY81;J3KSJ0	P18621;A0A087WXM6;J3QQT2;J3KRX5;A0A0A6YYL6;P18621-3;J3QLC8;A0A0A0MRF8;P18621-2;J3KRB3;A0A087WWH0;J3QS96	15;15;15;15;15;15;13;13;13;11;11;11;6;3	15;15;15;15;15;15;13;13;13;11;11;11;6;3	15;15;15;15;15;15;13;13;13;11;11;11;6;3	60S ribosomal protein L17	RPL17;RPL17-C18orf32	sp|P18621|RL17_HUMAN 60S ribosomal protein L17 OS=Homo sapiens OX=9606 GN=RPL17 PE=1 SV=3;tr|A0A087WXM6|A0A087WXM6_HUMAN 60S ribosomal protein L17 (Fragment) OS=Homo sapiens OX=9606 GN=RPL17 PE=1 SV=1;tr|J3QQT2|J3QQT2_HUMAN 60S ribosomal protein L17 (Fragm	14	15	15	15	7	7	13	7	7	7	6	12	9	6	5	7	7	7	13	7	7	7	6	12	9	6	5	7	7	7	13	7	7	7	6	12	9	6	5	7	54.9
84	Q765P7;A0A087WXN9;Q765P7-2	Q765P7;A0A087WXN9	5;5;1	5;5;1	5;5;1	MTSS1-like protein	MTSS1L	sp|Q765P7|MTSS2_HUMAN Protein MTSS 2 OS=Homo sapiens OX=9606 GN=MTSS2 PE=1 SV=1;tr|A0A087WXN9|A0A087WXN9_HUMAN Protein MTSS 2 OS=Homo sapiens OX=9606 GN=MTSS2 PE=1 SV=1	3	5	5	5	0	0	0	0	0	0	0	0	2	0	5	0	0	0	0	0	0	0	0	0	2	0	5	0	0	0	0	0	0	0	0	0	2	0	5	0	12
85	A0FGR8;A0FGR8-2;A0A499FIX8;H7BXI1;A0A087WXU3;A0FGR8-6;A0FGR8-4;A0FGR8-5	A0FGR8;A0FGR8-2;A0A499FIX8;H7BXI1;A0A087WXU3;A0FGR8-6;A0FGR8-4	15;15;15;15;15;15;8;6	15;15;15;15;15;15;8;6	15;15;15;15;15;15;8;6	Extended synaptotagmin-2	ESYT2	sp|A0FGR8|ESYT2_HUMAN Extended synaptotagmin-2 OS=Homo sapiens OX=9606 GN=ESYT2 PE=1 SV=1;sp|A0FGR8-2|ESYT2_HUMAN Isoform 2 of Extended synaptotagmin-2 OS=Homo sapiens OX=9606 GN=ESYT2;tr|A0A499FIX8|A0A499FIX8_HUMAN Extended synaptotagmin-2 OS=Homo sapiens	8	15	15	15	1	0	11	0	3	0	0	0	3	0	0	0	1	0	11	0	3	0	0	0	3	0	0	0	1	0	11	0	3	0	0	0	3	0	0	0	25.5
86	P41235;A0A087WXV4;P41235-5;P41235-4;P41235-6;P41235-2;P41235-7;P41235-3	P41235;A0A087WXV4;P41235-5;P41235-4;P41235-6;P41235-2;P41235-7;P41235-3	12;12;12;12;11;11;10;10	12;12;12;12;11;11;10;10	10;10;10;10;9;9;8;8	Hepatocyte nuclear factor 4-alpha	HNF4A	sp|P41235|HNF4A_HUMAN Hepatocyte nuclear factor 4-alpha OS=Homo sapiens OX=9606 GN=HNF4A PE=1 SV=3;tr|A0A087WXV4|A0A087WXV4_HUMAN Hepatocyte nuclear factor 4-alpha OS=Homo sapiens OX=9606 GN=HNF4A PE=1 SV=1;sp|P41235-5|HNF4A_HUMAN Isoform HNF4-Alpha-7 of H	8	12	12	10	0	5	5	11	1	5	0	3	3	9	0	3	0	5	5	11	1	5	0	3	3	9	0	3	0	3	4	9	1	3	0	2	2	7	0	1	40.5
87	Q96G74;H7BZQ3;A0A087WXV6;Q96G74-2;Q96G74-3;Q96G74-5;Q96G74-4	Q96G74;H7BZQ3;A0A087WXV6;Q96G74-2;Q96G74-3;Q96G74-5;Q96G74-4	2;2;2;2;2;2;1	2;2;2;2;2;2;1	2;2;2;2;2;2;1	OTU domain-containing protein 5	OTUD5	sp|Q96G74|OTUD5_HUMAN OTU domain-containing protein 5 OS=Homo sapiens OX=9606 GN=OTUD5 PE=1 SV=1;tr|H7BZQ3|H7BZQ3_HUMAN Deubiquitinating enzyme A (Fragment) OS=Homo sapiens OX=9606 GN=OTUD5 PE=1 SV=1;tr|A0A087WXV6|A0A087WXV6_HUMAN Deubiquitinating enzyme A	7	2	2	2	0	0	0	0	2	0	0	0	0	0	0	0	0	0	0	0	2	0	0	0	0	0	0	0	0	0	0	0	2	0	0	0	0	0	0	0	5.3
88	Q9BRV3;Q5SR67;A0A087WXX5;Q9BRV3-2;Q9BRV3-3	Q9BRV3;Q5SR67;A0A087WXX5;Q9BRV3-2;Q9BRV3-3	1;1;1;1;1	1;1;1;1;1	1;1;1;1;1	Sugar transporter SWEET1;Sugar transporter SWEET	SLC50A1	sp|Q9BRV3|SWET1_HUMAN Sugar transporter SWEET1 OS=Homo sapiens OX=9606 GN=SLC50A1 PE=1 SV=1;tr|Q5SR67|Q5SR67_HUMAN Solute carrier family 50 member 1 OS=Homo sapiens OX=9606 GN=SLC50A1 PE=1 SV=1;tr|A0A087WXX5|A0A087WXX5_HUMAN Solute carrier family 50 member	5	1	1	1	0	0	1	0	0	0	0	0	0	0	0	0	0	0	1	0	0	0	0	0	0	0	0	0	0	0	1	0	0	0	0	0	0	0	0	0	9
89	P54646;A0A087WXX9	P54646;A0A087WXX9	4;4	1;1	1;1	5-AMP-activated protein kinase catalytic subunit alpha-2	PRKAA2	sp|P54646|AAPK2_HUMAN 5-AMP-activated protein kinase catalytic subunit alpha-2 OS=Homo sapiens OX=9606 GN=PRKAA2 PE=1 SV=2;tr|A0A087WXX9|A0A087WXX9_HUMAN Acetyl-CoA carboxylase kinase OS=Homo sapiens OX=9606 GN=PRKAA2 PE=1 SV=1	2	4	1	1	0	0	1	0	2	0	0	0	3	0	2	0	0	0	0	0	1	0	0	0	0	0	0	0	0	0	0	0	1	0	0	0	0	0	0	0	12.1
90	P29122;H7BXT3;H0Y3Q0;A0A087WZR0;A0A087WY68;P29122-6;P29122-5;P29122-4;P29122-2;P29122-8;P29122-7;P29122-3	P29122;H7BXT3;H0Y3Q0;A0A087WZR0;A0A087WY68;P29122-6;P29122-5;P29122-4;P29122-2;P29122-8;P29122-7;P29122-3	2;2;2;2;2;2;2;2;2;2;2;1	2;2;2;2;2;2;2;2;2;2;2;1	2;2;2;2;2;2;2;2;2;2;2;1	Proprotein convertase subtilisin/kexin type 6	PCSK6	sp|P29122|PCSK6_HUMAN Proprotein convertase subtilisin/kexin type 6 OS=Homo sapiens OX=9606 GN=PCSK6 PE=1 SV=1;tr|H7BXT3|H7BXT3_HUMAN Proprotein convertase subtilisin/kexin type 6 OS=Homo sapiens OX=9606 GN=PCSK6 PE=1 SV=2;tr|H0Y3Q0|H0Y3Q0_HUMAN Proprotein	12	2	2	2	0	0	0	0	0	0	0	0	2	0	0	0	0	0	0	0	0	0	0	0	2	0	0	0	0	0	0	0	0	0	0	0	2	0	0	0	2.3
91	Q96CW1;Q96CW1-2;A0A087WY71;E9PFW3;C9JJ47;C9JTK4;C9JGT8;C9JJD3;C9JPV8;H7C4C3	Q96CW1;Q96CW1-2;A0A087WY71;E9PFW3;C9JJ47	14;14;14;14;9;5;5;3;3;2	14;14;14;14;9;5;5;3;3;2	14;14;14;14;9;5;5;3;3;2	AP-2 complex subunit mu	AP2M1	sp|Q96CW1|AP2M1_HUMAN AP-2 complex subunit mu OS=Homo sapiens OX=9606 GN=AP2M1 PE=1 SV=2;sp|Q96CW1-2|AP2M1_HUMAN Isoform 2 of AP-2 complex subunit mu OS=Homo sapiens OX=9606 GN=AP2M1;tr|A0A087WY71|A0A087WY71_HUMAN AP-2 complex subunit mu OS=Homo sapiens OX	10	14	14	14	4	9	4	8	8	9	3	3	4	6	4	6	4	9	4	8	8	9	3	3	4	6	4	6	4	9	4	8	8	9	3	3	4	6	4	6	45.7
92	P34932;A0A087WYC1;A0A087WTS8;P34932-2	P34932;A0A087WYC1;A0A087WTS8	3;3;2;1	3;3;2;1	3;3;2;1	Heat shock 70 kDa protein 4	HSPA4	sp|P34932|HSP74_HUMAN Heat shock 70 kDa protein 4 OS=Homo sapiens OX=9606 GN=HSPA4 PE=1 SV=4;tr|A0A087WYC1|A0A087WYC1_HUMAN Heat shock 70 kDa protein 4 OS=Homo sapiens OX=9606 GN=HSPA4 PE=1 SV=1;tr|A0A087WTS8|A0A087WTS8_HUMAN Heat shock 70 kDa protein 4 OS	4	3	3	3	1	0	2	0	0	0	0	0	0	0	0	0	1	0	2	0	0	0	0	0	0	0	0	0	1	0	2	0	0	0	0	0	0	0	0	0	5
93	A0A0B4J2B8;A0A087WYE8	A0A0B4J2B8;A0A087WYE8	1;1	1;1	1;1		IGHV1OR15-9;IGHV1OR21-1	tr|A0A0B4J2B8|A0A0B4J2B8_HUMAN Immunoglobulin heavy variable 1/OR15-9 (non-functional) (Fragment) OS=Homo sapiens OX=9606 GN=IGHV1OR15-9 PE=1 SV=1;tr|A0A087WYE8|A0A087WYE8_HUMAN Immunoglobulin heavy variable 1/OR21-1 (non-functional) (Fragment) OS=Homo sap	2	1	1	1	1	1	0	0	0	0	1	0	0	0	0	0	1	1	0	0	0	0	1	0	0	0	0	0	1	1	0	0	0	0	1	0	0	0	0	0	9.4
94	Q6UXV4;A0A087WYF7;A0A087WUX8	Q6UXV4;A0A087WYF7;A0A087WUX8	10;10;8	10;10;8	10;10;8	MICOS complex subunit MIC27	APOOL	sp|Q6UXV4|MIC27_HUMAN MICOS complex subunit MIC27 OS=Homo sapiens OX=9606 GN=APOOL PE=1 SV=1;tr|A0A087WYF7|A0A087WYF7_HUMAN MICOS complex subunit OS=Homo sapiens OX=9606 GN=APOOL PE=1 SV=1;tr|A0A087WUX8|A0A087WUX8_HUMAN MICOS complex subunit OS=Homo sapien	3	10	10	10	0	0	9	0	0	0	0	0	7	0	0	0	0	0	9	0	0	0	0	0	7	0	0	0	0	0	9	0	0	0	0	0	7	0	0	0	54.9
95	Q5TA45;C9IYS7;A0A087WYI0;Q5TA45-2;Q5TA45-4;Q5TA45-3;Q5TA45-5;J3QRY6;C9J979	Q5TA45;C9IYS7;A0A087WYI0;Q5TA45-2;Q5TA45-4;Q5TA45-3;Q5TA45-5;J3QRY6;C9J979	2;2;2;2;2;2;2;1;1	2;2;2;2;2;2;2;1;1	2;2;2;2;2;2;2;1;1	Integrator complex subunit 11	CPSF3L	sp|Q5TA45|INT11_HUMAN Integrator complex subunit 11 OS=Homo sapiens OX=9606 GN=INTS11 PE=1 SV=2;tr|C9IYS7|C9IYS7_HUMAN Cleavage and polyadenylation specific factor 3-like, isoform CRA_i OS=Homo sapiens OX=9606 GN=INTS11 PE=1 SV=1;tr|A0A087WYI0|A0A087WYI0_H	9	2	2	2	0	1	0	0	0	2	0	0	1	0	1	0	0	1	0	0	0	2	0	0	1	0	1	0	0	1	0	0	0	2	0	0	1	0	1	0	5.3
96	P28340;A0A2R8Y7K6;M0QZR8;A0A087WYJ2;M0R2B7;A0A2R8Y705	P28340;A0A2R8Y7K6;M0QZR8;A0A087WYJ2;M0R2B7;A0A2R8Y705	5;5;5;5;5;3	5;5;5;5;5;3	5;5;5;5;5;3	DNA polymerase delta catalytic subunit;DNA polymerase	POLD1	sp|P28340|DPOD1_HUMAN DNA polymerase delta catalytic subunit OS=Homo sapiens OX=9606 GN=POLD1 PE=1 SV=2;tr|A0A2R8Y7K6|A0A2R8Y7K6_HUMAN DNA-directed DNA polymerase OS=Homo sapiens OX=9606 GN=POLD1 PE=1 SV=1;tr|M0QZR8|M0QZR8_HUMAN DNA polymerase OS=Homo sapi	6	5	5	5	0	0	2	0	0	0	0	0	2	0	2	0	0	0	2	0	0	0	0	0	2	0	2	0	0	0	2	0	0	0	0	0	2	0	2	0	9.6
97	Q7Z478;A0A087WYN9	Q7Z478;A0A087WYN9	19;19	18;18	18;18	ATP-dependent RNA helicase DHX29	DHX29	sp|Q7Z478|DHX29_HUMAN ATP-dependent RNA helicase DHX29 OS=Homo sapiens OX=9606 GN=DHX29 PE=1 SV=2;tr|A0A087WYN9|A0A087WYN9_HUMAN ATP-dependent RNA helicase DHX29 OS=Homo sapiens OX=9606 GN=DHX29 PE=1 SV=1	2	19	18	18	0	1	18	0	0	0	0	0	1	0	0	0	0	1	17	0	0	0	0	0	1	0	0	0	0	1	17	0	0	0	0	0	1	0	0	0	24.5
98	A0A087WYS9	A0A087WYS9	2	1	1		SURF1	tr|A0A087WYS9|A0A087WYS9_HUMAN SURF1-like protein OS=Homo sapiens OX=9606 GN=SURF1 PE=1 SV=1	1	2	1	1	1	0	1	0	0	0	0	0	0	0	0	0	1	0	0	0	0	0	0	0	0	0	0	0	1	0	0	0	0	0	0	0	0	0	0	0	18.3
99	Q15185;A0A087WYT3;Q15185-4;B4DDC6;Q15185-3;Q15185-2	Q15185;A0A087WYT3;Q15185-4;B4DDC6;Q15185-3;Q15185-2	10;10;9;6;6;5	10;10;9;6;6;5	10;10;9;6;6;5	Prostaglandin E synthase 3	PTGES3	sp|Q15185|TEBP_HUMAN Prostaglandin E synthase 3 OS=Homo sapiens OX=9606 GN=PTGES3 PE=1 SV=1;tr|A0A087WYT3|A0A087WYT3_HUMAN Prostaglandin E synthase 3 OS=Homo sapiens OX=9606 GN=PTGES3 PE=1 SV=1;sp|Q15185-4|TEBP_HUMAN Isoform 4 of Prostaglandin E synthase 3	6	10	10	10	1	0	9	0	1	0	0	1	5	0	0	0	1	0	9	0	1	0	0	1	5	0	0	0	1	0	9	0	1	0	0	1	5	0	0	0	84.4
100	O94813;A0A087WYV5;X6R3P0;O94813-3;O94813-2	O94813;A0A087WYV5;X6R3P0;O94813-3;O94813-2	1;1;1;1;1	1;1;1;1;1	1;1;1;1;1	Slit homolog 2 protein;Slit homolog 2 protein N-product;Slit homolog 2 protein C-product	SLIT2	sp|O94813|SLIT2_HUMAN Slit homolog 2 protein OS=Homo sapiens OX=9606 GN=SLIT2 PE=1 SV=1;tr|A0A087WYV5|A0A087WYV5_HUMAN Slit homolog 2 protein OS=Homo sapiens OX=9606 GN=SLIT2 PE=1 SV=1;tr|X6R3P0|X6R3P0_HUMAN Slit homolog 2 protein OS=Homo sapiens OX=9606 G	5	1	1	1	0	0	0	0	0	0	0	1	0	0	0	0	0	0	0	0	0	0	0	1	0	0	0	0	0	0	0	0	0	0	0	1	0	0	0	0	1.2
101	P57105;A0A087WYV9;A0A087X1F5	P57105;A0A087WYV9;A0A087X1F5	1;1;1	1;1;1	1;1;1	Synaptojanin-2-binding protein	SYNJ2BP;SYNJ2BP-COX16	sp|P57105|SYJ2B_HUMAN Synaptojanin-2-binding protein OS=Homo sapiens OX=9606 GN=SYNJ2BP PE=1 SV=2;tr|A0A087WYV9|A0A087WYV9_HUMAN Cytochrome c oxidase assembly protein COX16 homolog, mitochondrial OS=Homo sapiens OX=9606 GN=SYNJ2BP-COX16 PE=3 SV=1;tr|A0A087	3	1	1	1	0	0	1	0	0	0	0	0	0	0	0	0	0	0	1	0	0	0	0	0	0	0	0	0	0	0	1	0	0	0	0	0	0	0	0	0	8.3
102	A0A087WZ13;E9PAU2;Q8IY67-2;Q8IY67;K7EKR9;Q8IY67-3;K7EQG2	A0A087WZ13;E9PAU2;Q8IY67-2;Q8IY67	11;11;10;7;3;2;1	11;11;10;7;3;2;1	11;11;10;7;3;2;1	Ribonucleoprotein PTB-binding 1	RAVER1	tr|A0A087WZ13|A0A087WZ13_HUMAN Ribonucleoprotein PTB-binding 1 OS=Homo sapiens OX=9606 GN=RAVER1 PE=1 SV=1;tr|E9PAU2|E9PAU2_HUMAN Ribonucleoprotein PTB-binding 1 OS=Homo sapiens OX=9606 GN=RAVER1 PE=1 SV=1;sp|Q8IY67-2|RAVR1_HUMAN Isoform 2 of Ribonucleopro	7	11	11	11	0	4	0	2	0	4	0	3	2	11	0	5	0	4	0	2	0	4	0	3	2	11	0	5	0	4	0	2	0	4	0	3	2	11	0	5	30.3
103	Q9HB19;A0A087WZ32;A0A087X038;A8K727;E5RHB5	Q9HB19;A0A087WZ32;A0A087X038;A8K727	6;6;6;6;2	6;6;6;6;2	6;6;6;6;2	Pleckstrin homology domain-containing family A member 2	PLEKHA2	sp|Q9HB19|PKHA2_HUMAN Pleckstrin homology domain-containing family A member 2 OS=Homo sapiens OX=9606 GN=PLEKHA2 PE=1 SV=2;tr|A0A087WZ32|A0A087WZ32_HUMAN Pleckstrin homology domain-containing family A member 2 OS=Homo sapiens OX=9606 GN=PLEKHA2 PE=1 SV=1;t	5	6	6	6	0	0	1	0	0	0	5	0	0	0	1	0	0	0	1	0	0	0	5	0	0	0	1	0	0	0	1	0	0	0	5	0	0	0	1	0	19.8
104	Q9HBI1;A0A087WZB5;Q9HBI1-3;Q9HBI1-2;Q9NVD7;B0QYP8	Q9HBI1;A0A087WZB5;Q9HBI1-3;Q9HBI1-2;Q9NVD7;B0QYP8	2;2;2;2;1;1	2;2;2;2;1;1	2;2;2;2;1;1	Beta-parvin;Alpha-parvin	PARVB;PARVA	sp|Q9HBI1|PARVB_HUMAN Beta-parvin OS=Homo sapiens OX=9606 GN=PARVB PE=1 SV=1;tr|A0A087WZB5|A0A087WZB5_HUMAN Beta-parvin OS=Homo sapiens OX=9606 GN=PARVB PE=1 SV=1;sp|Q9HBI1-3|PARVB_HUMAN Isoform 3 of Beta-parvin OS=Homo sapiens OX=9606 GN=PARVB;sp|Q9HBI1-2	6	2	2	2	0	0	0	1	0	0	0	0	1	0	0	0	0	0	0	1	0	0	0	0	1	0	0	0	0	0	0	1	0	0	0	0	1	0	0	0	6.3
105	P35680;E0YMJ8;A0A087WZC2;P35680-3;A0A0C4DGS8;P35680-2;A0A087WXS2;P35680-4	P35680;E0YMJ8;A0A087WZC2;P35680-3;A0A0C4DGS8;P35680-2;A0A087WXS2;P35680-4	9;9;9;9;8;8;6;6	9;9;9;9;8;8;6;6	7;7;7;7;6;6;5;4	Hepatocyte nuclear factor 1-beta	HNF1B	sp|P35680|HNF1B_HUMAN Hepatocyte nuclear factor 1-beta OS=Homo sapiens OX=9606 GN=HNF1B PE=1 SV=1;tr|E0YMJ8|E0YMJ8_HUMAN HNF1 beta A splice variant 3 OS=Homo sapiens OX=9606 GN=HNF1B PE=1 SV=1;tr|A0A087WZC2|A0A087WZC2_HUMAN Hepatocyte nuclear factor 1-beta	8	9	9	7	0	0	0	0	0	0	0	2	0	6	0	7	0	0	0	0	0	0	0	2	0	6	0	7	0	0	0	0	0	0	0	1	0	5	0	5	20.8
106	Q6ZSZ5;A0A3B3IPE9;A0A087WZG4;Q6ZSZ5-2;Q6ZSZ5-1;Q6ZSZ5-6;Q6ZSZ5-5;A0A590UK10;M0QZS0	Q6ZSZ5;A0A3B3IPE9;A0A087WZG4;Q6ZSZ5-2;Q6ZSZ5-1;Q6ZSZ5-6;Q6ZSZ5-5;A0A590UK10;M0QZS0	11;11;11;11;11;11;11;10;7	11;11;11;11;11;11;11;10;7	11;11;11;11;11;11;11;10;7	Rho guanine nucleotide exchange factor 18	ARHGEF18	sp|Q6ZSZ5|ARHGI_HUMAN Rho guanine nucleotide exchange factor 18 OS=Homo sapiens OX=9606 GN=ARHGEF18 PE=1 SV=4;tr|A0A3B3IPE9|A0A3B3IPE9_HUMAN Rho guanine nucleotide exchange factor 18 OS=Homo sapiens OX=9606 GN=ARHGEF18 PE=1 SV=2;tr|A0A087WZG4|A0A087WZG4_HU	9	11	11	11	0	0	0	0	0	0	0	0	10	0	3	0	0	0	0	0	0	0	0	0	10	0	3	0	0	0	0	0	0	0	0	0	10	0	3	0	12.1
107	O15372;A0A087WZK9;B3KS98;E5RJT0;E5RGU4;E5RFH0;E5RFW7	O15372;A0A087WZK9;B3KS98;E5RJT0	10;10;10;6;4;2;1	10;10;10;6;4;2;1	10;10;10;6;4;2;1	Eukaryotic translation initiation factor 3 subunit H	EIF3H	sp|O15372|EIF3H_HUMAN Eukaryotic translation initiation factor 3 subunit H OS=Homo sapiens OX=9606 GN=EIF3H PE=1 SV=1;tr|A0A087WZK9|A0A087WZK9_HUMAN Eukaryotic translation initiation factor 3 subunit H OS=Homo sapiens OX=9606 GN=EIF3H PE=1 SV=1;tr|B3KS98|B	7	10	10	10	0	0	10	0	0	0	0	0	0	0	0	0	0	0	10	0	0	0	0	0	0	0	0	0	0	0	10	0	0	0	0	0	0	0	0	0	50
108	O43837;A0A087WZN1;O43837-2;A0A087X2E5;O43837-3;A0A0D9SG66	O43837;A0A087WZN1;O43837-2;A0A087X2E5	17;17;15;15;8;6	17;17;15;15;8;6	17;17;15;15;8;6	Isocitrate dehydrogenase [NAD] subunit beta, mitochondrial;Isocitrate dehydrogenase [NAD] subunit, mitochondrial	IDH3B	sp|O43837|IDH3B_HUMAN Isocitrate dehydrogenase [NAD] subunit beta, mitochondrial OS=Homo sapiens OX=9606 GN=IDH3B PE=1 SV=2;tr|A0A087WZN1|A0A087WZN1_HUMAN Isocitrate dehydrogenase [NAD] subunit, mitochondrial OS=Homo sapiens OX=9606 GN=IDH3B PE=1 SV=1;sp|O	6	17	17	17	11	0	10	1	11	0	7	0	5	0	8	0	11	0	10	1	11	0	7	0	5	0	8	0	11	0	10	1	11	0	7	0	5	0	8	0	51.7
109	Q6UX53;A0A087WZT2	Q6UX53;A0A087WZT2	8;8	8;8	8;8	Methyltransferase-like protein 7B	METTL7B	sp|Q6UX53|MET7B_HUMAN Methyltransferase-like protein 7B OS=Homo sapiens OX=9606 GN=METTL7B PE=1 SV=2;tr|A0A087WZT2|A0A087WZT2_HUMAN Methyltransferase-like protein 7B OS=Homo sapiens OX=9606 GN=METTL7B PE=1 SV=1	2	8	8	8	3	2	7	2	4	0	0	0	0	0	0	0	3	2	7	2	4	0	0	0	0	0	0	0	3	2	7	2	4	0	0	0	0	0	0	0	38.1
110	P04637;P04637-4;A0A087WZU8;A0A0U1RQC9;P04637-7;A0A087X1Q1;P04637-2;P04637-6;P04637-8;P04637-9;P04637-3;A0A087WT22;E7ESS1;A0A087WXZ1;J3KP33;P04637-5;E7EQX7;E9PFT5	P04637;P04637-4;A0A087WZU8;A0A0U1RQC9;P04637-7;A0A087X1Q1;P04637-2;P04637-6;P04637-8;P04637-9;P04637-3;A0A087WT22;E7ESS1;A0A087WXZ1;J3KP33;P04637-5	3;3;3;3;3;3;2;2;2;2;2;2;2;2;2;2;1;1	3;3;3;3;3;3;2;2;2;2;2;2;2;2;2;2;1;1	3;3;3;3;3;3;2;2;2;2;2;2;2;2;2;2;1;1	Cellular tumor antigen p53	TP53	sp|P04637|P53_HUMAN Cellular tumor antigen p53 OS=Homo sapiens OX=9606 GN=TP53 PE=1 SV=4;sp|P04637-4|P53_HUMAN Isoform 4 of Cellular tumor antigen p53 OS=Homo sapiens OX=9606 GN=TP53;tr|A0A087WZU8|A0A087WZU8_HUMAN Cellular tumor antigen p53 OS=Homo sapiens	18	3	3	3	0	0	3	1	0	0	0	0	0	0	0	0	0	0	3	1	0	0	0	0	0	0	0	0	0	0	3	1	0	0	0	0	0	0	0	0	11.2
111	Q86UU0;A0A087WZX0;Q86UU0-4;Q86UU0-2;Q86UU0-3	Q86UU0;A0A087WZX0;Q86UU0-4;Q86UU0-2;Q86UU0-3	37;37;37;37;32	37;37;37;37;32	37;37;37;37;32	B-cell CLL/lymphoma 9-like protein	BCL9L	sp|Q86UU0|BCL9L_HUMAN B-cell CLL/lymphoma 9-like protein OS=Homo sapiens OX=9606 GN=BCL9L PE=1 SV=1;tr|A0A087WZX0|A0A087WZX0_HUMAN B-cell CLL/lymphoma 9-like protein OS=Homo sapiens OX=9606 GN=BCL9L PE=1 SV=1;sp|Q86UU0-4|BCL9L_HUMAN Isoform 4 of B-cell CLL	5	37	37	37	29	0	2	0	32	0	17	0	7	0	21	0	29	0	2	0	32	0	17	0	7	0	21	0	29	0	2	0	32	0	17	0	7	0	21	0	38.7
112	Q9Y496;J3KPF9;A0A087X011;E9PES4;H7C2F6;C9J9X2	Q9Y496;J3KPF9;A0A087X011;E9PES4	6;6;6;6;2;1	5;5;5;5;2;1	5;5;5;5;2;1	Kinesin-like protein KIF3A;Kinesin-like protein	KIF3A	sp|Q9Y496|KIF3A_HUMAN Kinesin-like protein KIF3A OS=Homo sapiens OX=9606 GN=KIF3A PE=1 SV=4;tr|J3KPF9|J3KPF9_HUMAN Kinesin-like protein OS=Homo sapiens OX=9606 GN=KIF3A PE=1 SV=1;tr|A0A087X011|A0A087X011_HUMAN Kinesin-like protein OS=Homo sapiens OX=9606 G	6	6	5	5	0	0	5	1	0	0	0	0	1	0	1	0	0	0	4	0	0	0	0	0	1	0	1	0	0	0	4	0	0	0	0	0	1	0	1	0	10
113	Q9Y3A5;A0A087X020	Q9Y3A5;A0A087X020	3;3	3;3	3;3	Ribosome maturation protein SBDS	SBDS	sp|Q9Y3A5|SBDS_HUMAN Ribosome maturation protein SBDS OS=Homo sapiens OX=9606 GN=SBDS PE=1 SV=4;tr|A0A087X020|A0A087X020_HUMAN Ribosome maturation protein SBDS OS=Homo sapiens OX=9606 GN=SBDS PE=1 SV=1	2	3	3	3	1	0	3	0	2	0	0	0	0	0	0	0	1	0	3	0	2	0	0	0	0	0	0	0	1	0	3	0	2	0	0	0	0	0	0	0	11.2
114	Q9Y4L1;A0A087X054;A0A494C039;E9PJ21;A0A087WWI4;K7EQK2;Q9Y4L1-2;J3QL06;J3KTF1;A0A087X214;A0A087WW13;Q9BST8;J3QQH7;J3QLE9	Q9Y4L1;A0A087X054;A0A494C039;E9PJ21;A0A087WWI4;K7EQK2;Q9Y4L1-2	5;5;5;4;4;4;3;2;2;1;1;1;1;1	5;5;5;4;4;4;3;2;2;1;1;1;1;1	5;5;5;4;4;4;3;2;2;1;1;1;1;1	Hypoxia up-regulated protein 1	HYOU1	sp|Q9Y4L1|HYOU1_HUMAN Hypoxia up-regulated protein 1 OS=Homo sapiens OX=9606 GN=HYOU1 PE=1 SV=1;tr|A0A087X054|A0A087X054_HUMAN Hypoxia up-regulated protein 1 OS=Homo sapiens OX=9606 GN=HYOU1 PE=1 SV=1;tr|A0A494C039|A0A494C039_HUMAN Hypoxia up-regulated pro	14	5	5	5	0	0	2	0	0	0	0	0	4	0	0	0	0	0	2	0	0	0	0	0	4	0	0	0	0	0	2	0	0	0	0	0	4	0	0	0	8.8
115	Q5SQN1;A0A087X0B7;H7C3C7;Q5SQN1-2	Q5SQN1;A0A087X0B7;H7C3C7;Q5SQN1-2	1;1;1;1	1;1;1;1	1;1;1;1	Synaptosomal-associated protein 47	SNAP47	sp|Q5SQN1|SNP47_HUMAN Synaptosomal-associated protein 47 OS=Homo sapiens OX=9606 GN=SNAP47 PE=1 SV=3;tr|A0A087X0B7|A0A087X0B7_HUMAN Synaptosomal-associated protein 47 OS=Homo sapiens OX=9606 GN=SNAP47 PE=1 SV=1;tr|H7C3C7|H7C3C7_HUMAN Synaptosomal-associate	4	1	1	1	0	0	1	0	0	0	0	0	0	0	0	0	0	0	1	0	0	0	0	0	0	0	0	0	0	0	1	0	0	0	0	0	0	0	0	0	2.6
116	Q8NEL9;A0A6E1W401;A0A087X0H7;Q8NEL9-3;Q8NEL9-2;Q8NEL9-4;A0A669KAW5;A0A669KB51;A0A669KB64	Q8NEL9;A0A6E1W401;A0A087X0H7;Q8NEL9-3;Q8NEL9-2;Q8NEL9-4;A0A669KAW5;A0A669KB51	4;4;4;4;4;4;3;3;1	4;4;4;4;4;4;3;3;1	4;4;4;4;4;4;3;3;1	Phospholipase DDHD1	DDHD1	sp|Q8NEL9|DDHD1_HUMAN Phospholipase DDHD1 OS=Homo sapiens OX=9606 GN=DDHD1 PE=1 SV=2;tr|A0A6E1W401|A0A6E1W401_HUMAN Phospholipase DDHD1 (Fragment) OS=Homo sapiens OX=9606 GN=DDHD1 PE=4 SV=1;tr|A0A087X0H7|A0A087X0H7_HUMAN Phospholipase DDHD1 OS=Homo sapiens	9	4	4	4	0	0	0	0	1	0	0	0	1	1	2	0	0	0	0	0	1	0	0	0	1	1	2	0	0	0	0	0	1	0	0	0	1	1	2	0	5.1
117	Q5T8P6;Q5T8P6-3;A0A087X0H9;Q5T8P6-5;Q5T8P6-4;Q5T8P6-2	Q5T8P6;Q5T8P6-3;A0A087X0H9;Q5T8P6-5;Q5T8P6-4;Q5T8P6-2	3;3;3;3;3;3	1;1;1;1;1;1	1;1;1;1;1;1	RNA-binding protein 26	RBM26	sp|Q5T8P6|RBM26_HUMAN RNA-binding protein 26 OS=Homo sapiens OX=9606 GN=RBM26 PE=1 SV=3;sp|Q5T8P6-3|RBM26_HUMAN Isoform 3 of RNA-binding protein 26 OS=Homo sapiens OX=9606 GN=RBM26;tr|A0A087X0H9|A0A087X0H9_HUMAN RNA-binding protein 26 OS=Homo sapiens OX=96	6	3	1	1	0	2	1	0	0	2	0	2	1	2	0	2	0	0	0	0	0	0	0	0	1	0	0	0	0	0	0	0	0	0	0	0	1	0	0	0	2.9
118	Q15070;A0A087X0L7;J3KNA0;Q15070-2;E7EVY0;C9JC63;Q15070-3	Q15070;A0A087X0L7;J3KNA0;Q15070-2;E7EVY0	11;11;11;11;10;4;3	11;11;11;11;10;4;3	11;11;11;11;10;4;3	Mitochondrial inner membrane protein OXA1L	OXA1L	sp|Q15070|OXA1L_HUMAN Mitochondrial inner membrane protein OXA1L OS=Homo sapiens OX=9606 GN=OXA1L PE=1 SV=3;tr|A0A087X0L7|A0A087X0L7_HUMAN Mitochondrial inner membrane protein OXA1L OS=Homo sapiens OX=9606 GN=OXA1L PE=1 SV=1;tr|J3KNA0|J3KNA0_HUMAN Mitochon	7	11	11	11	1	0	8	0	4	0	3	0	4	2	3	0	1	0	8	0	4	0	3	0	4	2	3	0	1	0	8	0	4	0	3	0	4	2	3	0	26.9
119	A8MQ14;A0A087X0M6	A8MQ14;A0A087X0M6	3;3	2;2	2;2	Zinc finger protein 850	ZNF850	sp|A8MQ14|ZN850_HUMAN Zinc finger protein 850 OS=Homo sapiens OX=9606 GN=ZNF850 PE=3 SV=2;tr|A0A087X0M6|A0A087X0M6_HUMAN Zinc finger protein 850 OS=Homo sapiens OX=9606 GN=ZNF850 PE=1 SV=1	2	3	2	2	0	0	0	0	0	2	0	2	0	0	0	1	0	0	0	0	0	1	0	1	0	0	0	0	0	0	0	0	0	1	0	1	0	0	0	0	4.4
120	Q96CW6;A0A087X0P9	Q96CW6;A0A087X0P9	1;1	1;1	1;1	Probable RNA polymerase II nuclear localization protein SLC7A6OS	SLC7A6OS	sp|Q96CW6|S7A6O_HUMAN Probable RNA polymerase II nuclear localization protein SLC7A6OS OS=Homo sapiens OX=9606 GN=SLC7A6OS PE=1 SV=2;tr|A0A087X0P9|A0A087X0P9_HUMAN Probable RNA polymerase II nuclear localization protein SLC7A6OS (Fragment) OS=Homo sapiens	2	1	1	1	0	0	1	0	0	0	0	0	1	0	0	0	0	0	1	0	0	0	0	0	1	0	0	0	0	0	1	0	0	0	0	0	1	0	0	0	8.1
121	Q8IXZ3;A0A087X0Q6;Q8IXZ3-2;Q8IXZ3-1;Q8IXZ3-4;P0CG40	Q8IXZ3;A0A087X0Q6;Q8IXZ3-2;Q8IXZ3-1;Q8IXZ3-4;P0CG40	4;4;4;4;4;2	4;4;4;4;4;2	4;4;4;4;4;2	Transcription factor Sp8;Transcription factor Sp9	SP8;SP9	sp|Q8IXZ3|SP8_HUMAN Transcription factor Sp8 OS=Homo sapiens OX=9606 GN=SP8 PE=1 SV=3;tr|A0A087X0Q6|A0A087X0Q6_HUMAN Sp8 transcription factor, isoform CRA_d OS=Homo sapiens OX=9606 GN=SP8 PE=1 SV=1;sp|Q8IXZ3-2|SP8_HUMAN Isoform 2 of Transcription factor Sp	6	4	4	4	0	2	0	0	0	1	0	3	0	0	1	4	0	2	0	0	0	1	0	3	0	0	1	4	0	2	0	0	0	1	0	3	0	0	1	4	10.4
122	O15550;F5H6S1;F8W8R6;A0A087X0R0;H0Y6I7;H0Y6V5;A0A087WUN6	O15550;F5H6S1;F8W8R6;A0A087X0R0;H0Y6I7	10;10;10;10;6;1;1	10;10;10;10;6;1;1	1;1;1;1;1;1;0	Lysine-specific demethylase 6A	KDM6A	sp|O15550|KDM6A_HUMAN Lysine-specific demethylase 6A OS=Homo sapiens OX=9606 GN=KDM6A PE=1 SV=2;tr|F5H6S1|F5H6S1_HUMAN Lysine-specific demethylase 6A OS=Homo sapiens OX=9606 GN=KDM6A PE=1 SV=2;tr|F8W8R6|F8W8R6_HUMAN Lysine-specific demethylase 6A OS=Homo s	7	10	10	1	1	5	0	5	2	6	0	2	0	1	0	6	1	5	0	5	2	6	0	2	0	1	0	6	0	0	0	1	0	0	0	0	0	0	0	1	10.5
123	A0A087X0S4	A0A087X0S4	3	1	1		KLF4	tr|A0A087X0S4|A0A087X0S4_HUMAN Krueppel-like factor 4 OS=Homo sapiens OX=9606 GN=KLF4 PE=1 SV=1	1	3	1	1	0	2	0	1	0	3	0	0	0	0	0	0	0	1	0	1	0	1	0	0	0	0	0	0	0	1	0	1	0	1	0	0	0	0	0	0	32.4
124	Q5TC63;A0A087X0Y1;Q5TC63-3	Q5TC63;A0A087X0Y1;Q5TC63-3	1;1;1	1;1;1	1;1;1	Growth hormone-regulated TBC protein 1	GRTP1	sp|Q5TC63|GRTP1_HUMAN Growth hormone-regulated TBC protein 1 OS=Homo sapiens OX=9606 GN=GRTP1 PE=1 SV=4;tr|A0A087X0Y1|A0A087X0Y1_HUMAN Growth hormone-regulated TBC protein 1 OS=Homo sapiens OX=9606 GN=GRTP1 PE=1 SV=1;sp|Q5TC63-3|GRTP1_HUMAN Isoform 3 of Gr	3	1	1	1	0	0	0	1	0	0	0	0	0	0	0	0	0	0	0	1	0	0	0	0	0	0	0	0	0	0	0	1	0	0	0	0	0	0	0	0	3.3
125	Q5JPE7;Q15155;P69849;J3KN36;A0A0G2JN29;A0A087X117;Q5JPE7-2;A0A0G2JP90;A0A087WW46;Q5JPE7-3;A0A087WTD5;H3BUC9;H3BPS9	Q5JPE7;Q15155;P69849;J3KN36;A0A0G2JN29;A0A087X117;Q5JPE7-2;A0A0G2JP90;A0A087WW46;Q5JPE7-3	9;9;9;9;9;9;9;8;8;8;3;1;1	9;9;9;9;9;9;9;8;8;8;3;1;1	9;9;9;9;9;9;9;8;8;8;3;1;1	Nodal modulator 2;Nodal modulator 1;Nodal modulator 3	NOMO2;NOMO1;NOMO3	sp|Q5JPE7|NOMO2_HUMAN Nodal modulator 2 OS=Homo sapiens OX=9606 GN=NOMO2 PE=1 SV=1;sp|Q15155|NOMO1_HUMAN Nodal modulator 1 OS=Homo sapiens OX=9606 GN=NOMO1 PE=1 SV=5;sp|P69849|NOMO3_HUMAN Nodal modulator 3 OS=Homo sapiens OX=9606 GN=NOMO3 PE=1 SV=2;tr|J3KN	13	9	9	9	0	0	7	0	0	0	0	0	4	0	0	0	0	0	7	0	0	0	0	0	4	0	0	0	0	0	7	0	0	0	0	0	4	0	0	0	10.1
126	Q8NF64;E7EWM3;A0A087X127;Q8NF64-3;Q8NF64-2	Q8NF64;E7EWM3;A0A087X127;Q8NF64-3;Q8NF64-2	20;20;20;20;20	12;12;12;12;12	12;12;12;12;12	Zinc finger MIZ domain-containing protein 2	ZMIZ2	sp|Q8NF64|ZMIZ2_HUMAN Zinc finger MIZ domain-containing protein 2 OS=Homo sapiens OX=9606 GN=ZMIZ2 PE=1 SV=2;tr|E7EWM3|E7EWM3_HUMAN Zinc finger MIZ domain-containing protein 2 OS=Homo sapiens OX=9606 GN=ZMIZ2 PE=1 SV=1;tr|A0A087X127|A0A087X127_HUMAN Zinc f	5	20	12	12	14	1	5	1	18	1	17	2	7	1	15	3	7	0	1	0	10	0	11	0	7	0	9	1	7	0	1	0	10	0	11	0	7	0	9	1	36.6
127	Q9NP72;A0A087X163;Q9NP72-2;Q5W0J0;Q9NP72-3;H0Y6T8	Q9NP72;A0A087X163;Q9NP72-2;Q5W0J0;Q9NP72-3	3;3;3;2;2;1	3;3;3;2;2;1	3;3;3;2;2;1	Ras-related protein Rab-18	RAB18	sp|Q9NP72|RAB18_HUMAN Ras-related protein Rab-18 OS=Homo sapiens OX=9606 GN=RAB18 PE=1 SV=1;tr|A0A087X163|A0A087X163_HUMAN Ras-related protein Rab-18 OS=Homo sapiens OX=9606 GN=RAB18 PE=1 SV=1;sp|Q9NP72-2|RAB18_HUMAN Isoform 2 of Ras-related protein Rab-18	6	3	3	3	0	0	0	0	0	0	0	0	3	0	0	0	0	0	0	0	0	0	0	0	3	0	0	0	0	0	0	0	0	0	0	0	3	0	0	0	18.9
128	A0A087X172	A0A087X172	1	1	1		OR4C3	tr|A0A087X172|A0A087X172_HUMAN Olfactory receptor 4C3 OS=Homo sapiens OX=9606 GN=OR4C3 PE=4 SV=1	1	1	1	1	0	0	0	0	1	1	0	0	0	0	1	1	0	0	0	0	1	1	0	0	0	0	1	1	0	0	0	0	1	1	0	0	0	0	1	1	5
129	Q53GS9;A0A087X1B2;B9A018;Q53GS9-2;Q53GS9-3;A0A087WW31	Q53GS9;A0A087X1B2;B9A018;Q53GS9-2;Q53GS9-3	4;4;4;4;3;1	4;4;4;4;3;1	4;4;4;4;3;1	U4/U6.U5 tri-snRNP-associated protein 2	USP39	sp|Q53GS9|SNUT2_HUMAN U4/U6.U5 tri-snRNP-associated protein 2 OS=Homo sapiens OX=9606 GN=USP39 PE=1 SV=2;tr|A0A087X1B2|A0A087X1B2_HUMAN U4/U6.U5 tri-snRNP-associated protein 2 OS=Homo sapiens OX=9606 GN=USP39 PE=1 SV=1;tr|B9A018|B9A018_HUMAN U4/U6.U5 tri-s	6	4	4	4	0	0	3	1	0	0	0	0	0	0	0	0	0	0	3	1	0	0	0	0	0	0	0	0	0	0	3	1	0	0	0	0	0	0	0	0	11.9
130	O60613;A0A087X1G7	O60613;A0A087X1G7	1;1	1;1	1;1	15 kDa selenoprotein	SELENOF	sp|O60613|SEP15_HUMAN Selenoprotein F OS=Homo sapiens OX=9606 GN=SELENOF PE=1 SV=4;tr|A0A087X1G7|A0A087X1G7_HUMAN Selenoprotein F OS=Homo sapiens OX=9606 GN=SELENOF PE=1 SV=1	2	1	1	1	0	0	0	0	0	0	0	0	0	0	1	0	0	0	0	0	0	0	0	0	0	0	1	0	0	0	0	0	0	0	0	0	0	0	1	0	7.9
131	P22352;A0A087X1J7	P22352;A0A087X1J7	1;1	1;1	1;1	Glutathione peroxidase 3;Glutathione peroxidase	GPX3	sp|P22352|GPX3_HUMAN Glutathione peroxidase 3 OS=Homo sapiens OX=9606 GN=GPX3 PE=1 SV=2;tr|A0A087X1J7|A0A087X1J7_HUMAN Glutathione peroxidase OS=Homo sapiens OX=9606 GN=GPX3 PE=1 SV=1	2	1	1	1	0	0	0	1	0	1	0	0	0	1	0	1	0	0	0	1	0	1	0	0	0	1	0	1	0	0	0	1	0	1	0	0	0	1	0	1	5.3
132	Q9Y2Y9;A0A087X1K6;H0YK05	Q9Y2Y9;A0A087X1K6	4;4;1	4;4;1	4;4;1	Krueppel-like factor 13	KLF13	sp|Q9Y2Y9|KLF13_HUMAN Krueppel-like factor 13 OS=Homo sapiens OX=9606 GN=KLF13 PE=1 SV=1;tr|A0A087X1K6|A0A087X1K6_HUMAN Krueppel-like factor 13 OS=Homo sapiens OX=9606 GN=KLF13 PE=1 SV=1	3	4	4	4	0	3	0	2	0	3	0	3	0	3	0	2	0	3	0	2	0	3	0	3	0	3	0	2	0	3	0	2	0	3	0	3	0	3	0	2	23.6
133	P20929;P20929-3;A0A087X1N7;P20929-4;P20929-2;H0Y786	P20929;P20929-3;A0A087X1N7;P20929-4;P20929-2;H0Y786	2;2;2;2;2;1	2;2;2;2;2;1	2;2;2;2;2;1	Nebulin	NEB	sp|P20929|NEBU_HUMAN Nebulin OS=Homo sapiens OX=9606 GN=NEB PE=1 SV=5;sp|P20929-3|NEBU_HUMAN Isoform 3 of Nebulin OS=Homo sapiens OX=9606 GN=NEB;tr|A0A087X1N7|A0A087X1N7_HUMAN Nebulin OS=Homo sapiens OX=9606 GN=NEB PE=1 SV=1;sp|P20929-4|NEBU_HUMAN Isoform	6	2	2	2	0	0	1	0	0	0	0	0	0	0	1	0	0	0	1	0	0	0	0	0	0	0	1	0	0	0	1	0	0	0	0	0	0	0	1	0	0.3
134	Q96RT8;Q96RT8-2;A0A0G2JQX1;A0A0G2JPW5;A0A0G2JSA7;A0A087X1Z1;A0A0G2JQI0;A0A087X006	Q96RT8;Q96RT8-2;A0A0G2JQX1;A0A0G2JPW5;A0A0G2JSA7;A0A087X1Z1;A0A0G2JQI0;A0A087X006	2;2;2;2;2;2;1;1	2;2;2;2;2;2;1;1	2;2;2;2;2;2;1;1	Gamma-tubulin complex component 5	TUBGCP5	sp|Q96RT8|GCP5_HUMAN Gamma-tubulin complex component 5 OS=Homo sapiens OX=9606 GN=TUBGCP5 PE=1 SV=1;sp|Q96RT8-2|GCP5_HUMAN Isoform 2 of Gamma-tubulin complex component 5 OS=Homo sapiens OX=9606 GN=TUBGCP5;tr|A0A0G2JQX1|A0A0G2JQX1_HUMAN Gamma-tubulin comple	8	2	2	2	0	0	0	0	1	0	0	0	1	0	0	0	0	0	0	0	1	0	0	0	1	0	0	0	0	0	0	0	1	0	0	0	1	0	0	0	2.7
135	Q9UL46;H0YM70;A0A087X1Z3;H0YKU2	Q9UL46;H0YM70;A0A087X1Z3	3;3;3;1	3;3;3;1	3;3;3;1	Proteasome activator complex subunit 2	PSME2	sp|Q9UL46|PSME2_HUMAN Proteasome activator complex subunit 2 OS=Homo sapiens OX=9606 GN=PSME2 PE=1 SV=4;tr|H0YM70|H0YM70_HUMAN Proteasome activator complex subunit 2 OS=Homo sapiens OX=9606 GN=PSME2 PE=1 SV=1;tr|A0A087X1Z3|A0A087X1Z3_HUMAN Proteasome activ	4	3	3	3	3	0	0	0	0	0	0	0	0	0	0	0	3	0	0	0	0	0	0	0	0	0	0	0	3	0	0	0	0	0	0	0	0	0	0	0	15.5
136	Q8TCG1;A0A087X211;Q8TCG1-2;F8WF26;F8WAX6	Q8TCG1;A0A087X211;Q8TCG1-2	4;4;3;1;1	4;4;3;1;1	4;4;3;1;1	Protein CIP2A	KIAA1524	sp|Q8TCG1|CIP2A_HUMAN Protein CIP2A OS=Homo sapiens OX=9606 GN=CIP2A PE=1 SV=2;tr|A0A087X211|A0A087X211_HUMAN Protein CIP2A OS=Homo sapiens OX=9606 GN=CIP2A PE=1 SV=1;sp|Q8TCG1-2|CIP2A_HUMAN Isoform 2 of Protein CIP2A OS=Homo sapiens OX=9606 GN=CIP2A	5	4	4	4	0	0	4	0	0	0	0	0	1	0	0	0	0	0	4	0	0	0	0	0	1	0	0	0	0	0	4	0	0	0	0	0	1	0	0	0	5.9
137	Q2M389;A0A087X256;Q2M389-2;F8VYH7;F8W1W1	Q2M389;A0A087X256;Q2M389-2	13;13;10;3;2	13;13;10;3;2	13;13;10;3;2	WASH complex subunit 7	KIAA1033	sp|Q2M389|WASC4_HUMAN WASH complex subunit 4 OS=Homo sapiens OX=9606 GN=WASHC4 PE=1 SV=2;tr|A0A087X256|A0A087X256_HUMAN WASH complex subunit 4 OS=Homo sapiens OX=9606 GN=WASHC4 PE=1 SV=1;sp|Q2M389-2|WASC4_HUMAN Isoform 2 of WASH complex subunit 4 OS=Homo s	5	13	13	13	0	0	13	0	0	0	0	0	5	0	0	0	0	0	13	0	0	0	0	0	5	0	0	0	0	0	13	0	0	0	0	0	5	0	0	0	19.7
138	Q9BRJ2;A0A087X2D5;A0A0G2JMS5;A0A087WU62	Q9BRJ2;A0A087X2D5;A0A0G2JMS5;A0A087WU62	8;8;5;5	8;8;5;5	8;8;5;5	39S ribosomal protein L45, mitochondrial	MRPL45	sp|Q9BRJ2|RM45_HUMAN 39S ribosomal protein L45, mitochondrial OS=Homo sapiens OX=9606 GN=MRPL45 PE=1 SV=2;tr|A0A087X2D5|A0A087X2D5_HUMAN 39S ribosomal protein L45, mitochondrial OS=Homo sapiens OX=9606 GN=MRPL45 PE=1 SV=1;tr|A0A0G2JMS5|A0A0G2JMS5_HUMAN 39S	4	8	8	8	0	0	7	0	0	0	0	0	3	1	0	0	0	0	7	0	0	0	0	0	3	1	0	0	0	0	7	0	0	0	0	0	3	1	0	0	41.8
139	A0A087X2F1;Q16670;A0A024RCN4;Q16670-2;B4DMT1;A0A087WXM4	A0A087X2F1;Q16670;A0A024RCN4;Q16670-2;B4DMT1	6;5;5;4;3;2	6;5;5;4;3;2	6;5;5;4;3;2	Zinc finger and SCAN domain-containing protein 26	ZSCAN26;ZNF187	tr|A0A087X2F1|A0A087X2F1_HUMAN Zinc finger and SCAN domain-containing protein 26 OS=Homo sapiens OX=9606 GN=ZSCAN26 PE=1 SV=1;sp|Q16670|ZSC26_HUMAN Zinc finger and SCAN domain-containing protein 26 OS=Homo sapiens OX=9606 GN=ZSCAN26 PE=1 SV=2;tr|A0A024RCN4	6	6	6	6	0	2	0	0	0	2	0	5	0	0	0	2	0	2	0	0	0	2	0	5	0	0	0	2	0	2	0	0	0	2	0	5	0	0	0	2	23
140	Q9ULT8;G3V4V5;A0A087X2H1;A0A087WVU6;H0YJP0	Q9ULT8;G3V4V5;A0A087X2H1	4;4;4;1;1	4;4;4;1;1	4;4;4;1;1	E3 ubiquitin-protein ligase HECTD1	HECTD1	sp|Q9ULT8|HECD1_HUMAN E3 ubiquitin-protein ligase HECTD1 OS=Homo sapiens OX=9606 GN=HECTD1 PE=1 SV=3;tr|G3V4V5|G3V4V5_HUMAN E3 ubiquitin-protein ligase HECTD1 (Fragment) OS=Homo sapiens OX=9606 GN=HECTD1 PE=1 SV=1;tr|A0A087X2H1|A0A087X2H1_HUMAN HECT-type E	5	4	4	4	0	0	3	0	0	0	0	0	1	0	0	0	0	0	3	0	0	0	0	0	1	0	0	0	0	0	3	0	0	0	0	0	1	0	0	0	2.9
141	P62333;H0YJC0;A0A087X2I1;H0YJE9;H0YJT1;H0YJS8	P62333;H0YJC0;A0A087X2I1	3;3;3;1;1;1	3;3;3;1;1;1	3;3;3;1;1;1	26S protease regulatory subunit 10B	PSMC6	sp|P62333|PRS10_HUMAN 26S proteasome regulatory subunit 10B OS=Homo sapiens OX=9606 GN=PSMC6 PE=1 SV=1;tr|H0YJC0|H0YJC0_HUMAN 26S proteasome regulatory subunit 10B (Fragment) OS=Homo sapiens OX=9606 GN=PSMC6 PE=1 SV=1;tr|A0A087X2I1|A0A087X2I1_HUMAN 26S pro	6	3	3	3	2	0	1	0	0	0	0	0	3	1	1	0	2	0	1	0	0	0	0	0	3	1	1	0	2	0	1	0	0	0	0	0	3	1	1	0	10.3
142	Q9BZ29;Q9BZ29-5;X6RGR3;Q5JUD8;H0Y3S1;A0A088AWN3;A0A0A0MSY4;Q9BZ29-3;Q9BZ29-4	Q9BZ29;Q9BZ29-5;X6RGR3;Q5JUD8;H0Y3S1;A0A088AWN3;A0A0A0MSY4;Q9BZ29-3;Q9BZ29-4	1;1;1;1;1;1;1;1;1	1;1;1;1;1;1;1;1;1	1;1;1;1;1;1;1;1;1	Dedicator of cytokinesis protein 9	DOCK9	sp|Q9BZ29|DOCK9_HUMAN Dedicator of cytokinesis protein 9 OS=Homo sapiens OX=9606 GN=DOCK9 PE=1 SV=2;sp|Q9BZ29-5|DOCK9_HUMAN Isoform 2 of Dedicator of cytokinesis protein 9 OS=Homo sapiens OX=9606 GN=DOCK9;tr|X6RGR3|X6RGR3_HUMAN Dedicator of cytokinesis pro	9	1	1	1	0	0	1	0	0	0	0	0	0	0	0	0	0	0	1	0	0	0	0	0	0	0	0	0	0	0	1	0	0	0	0	0	0	0	0	0	0.5
143	Q9UHQ1;E7EP87;A0A088AWN8;Q9UHQ1-4;Q9UHQ1-3;Q9UHQ1-2;J3KT43;J3QL28;J3QSD9;J3KTP5;J3QRB0;J3KTG5;J3KRH7;J3KS48;E9PH27	Q9UHQ1;E7EP87;A0A088AWN8;Q9UHQ1-4;Q9UHQ1-3;Q9UHQ1-2	6;6;6;6;6;6;2;1;1;1;1;1;1;1;1	6;6;6;6;6;6;2;1;1;1;1;1;1;1;1	6;6;6;6;6;6;2;1;1;1;1;1;1;1;1	Nuclear prelamin A recognition factor	NARF	sp|Q9UHQ1|NARF_HUMAN Nuclear prelamin A recognition factor OS=Homo sapiens OX=9606 GN=NARF PE=1 SV=1;tr|E7EP87|E7EP87_HUMAN Nuclear prelamin A recognition factor OS=Homo sapiens OX=9606 GN=NARF PE=1 SV=2;tr|A0A088AWN8|A0A088AWN8_HUMAN Nuclear prelamin A re	15	6	6	6	0	0	0	0	0	0	5	0	0	0	5	0	0	0	0	0	0	0	5	0	0	0	5	0	0	0	0	0	0	0	5	0	0	0	5	0	17.8
144	P23508;P23508-2;A0A096LNU0;D6REY2	P23508;P23508-2;A0A096LNU0;D6REY2	1;1;1;1	1;1;1;1	1;1;1;1	Colorectal mutant cancer protein	MCC	sp|P23508|CRCM_HUMAN Colorectal mutant cancer protein OS=Homo sapiens OX=9606 GN=MCC PE=1 SV=2;sp|P23508-2|CRCM_HUMAN Isoform 2 of Colorectal mutant cancer protein OS=Homo sapiens OX=9606 GN=MCC;tr|A0A096LNU0|A0A096LNU0_HUMAN Colorectal mutant cancer prote	4	1	1	1	1	0	0	0	0	0	0	0	0	0	0	0	1	0	0	0	0	0	0	0	0	0	0	0	1	0	0	0	0	0	0	0	0	0	0	0	1.3
145	Q86Y79;A0A096LP22;A0A096LP34;A0A096LPA3;C9J7Z1	Q86Y79;A0A096LP22;A0A096LP34;A0A096LPA3;C9J7Z1	2;2;1;1;1	2;2;1;1;1	2;2;1;1;1	Probable peptidyl-tRNA hydrolase	PTRH1	sp|Q86Y79|PTH_HUMAN Probable peptidyl-tRNA hydrolase OS=Homo sapiens OX=9606 GN=PTRH1 PE=1 SV=1;tr|A0A096LP22|A0A096LP22_HUMAN Probable peptidyl-tRNA hydrolase (Fragment) OS=Homo sapiens OX=9606 GN=PTRH1 PE=1 SV=1;tr|A0A096LP34|A0A096LP34_HUMAN Probable pe	5	2	2	2	0	0	2	0	0	0	0	0	0	0	0	0	0	0	2	0	0	0	0	0	0	0	0	0	0	0	2	0	0	0	0	0	0	0	0	0	15.9
146	A0A096LP25;Q6ZSR9;A0A096LNZ0	A0A096LP25;Q6ZSR9;A0A096LNZ0	15;11;10	12;11;7	12;11;7	Uncharacterized protein FLJ45252	AAK1	tr|A0A096LP25|A0A096LP25_HUMAN AP2-associated protein kinase 1 (Fragment) OS=Homo sapiens OX=9606 GN=AAK1 PE=1 SV=1;sp|Q6ZSR9|YJ005_HUMAN Uncharacterized protein FLJ45252 OS=Homo sapiens OX=9606 PE=2 SV=2;tr|A0A096LNZ0|A0A096LNZ0_HUMAN AP2-associated prote	3	15	12	12	7	0	1	0	14	0	13	0	11	4	14	2	6	0	1	0	11	0	11	0	8	3	11	1	6	0	1	0	11	0	11	0	8	3	11	1	49.7
147	A0A096LPK8	A0A096LPK8	8	1	1		ZNF638	tr|A0A096LPK8|A0A096LPK8_HUMAN Zinc finger protein 638 (Fragment) OS=Homo sapiens OX=9606 GN=ZNF638 PE=1 SV=1	1	8	1	1	0	4	1	3	0	4	0	8	0	7	0	6	0	0	0	0	0	0	0	1	0	1	0	0	0	0	0	0	0	0	0	1	0	1	0	0	41.4
148	Q9BY42;A0A0A0MQR2;A2A2L5;A2A2L6	Q9BY42;A0A0A0MQR2;A2A2L5	3;3;2;1	3;3;2;1	3;3;2;1	Protein RTF2 homolog	RTFDC1	sp|Q9BY42|RTF2_HUMAN Replication termination factor 2 OS=Homo sapiens OX=9606 GN=RTF2 PE=1 SV=3;tr|A0A0A0MQR2|A0A0A0MQR2_HUMAN Replication termination factor 2 OS=Homo sapiens OX=9606 GN=RTF2 PE=1 SV=1;tr|A2A2L5|A2A2L5_HUMAN Replication termination factor	4	3	3	3	1	0	1	0	2	0	0	0	0	0	2	0	1	0	1	0	2	0	0	0	0	0	2	0	1	0	1	0	2	0	0	0	0	0	2	0	13.4
149	Q53H96;A0A0A0MQS1;Q53H96-2;B5MD87	Q53H96;A0A0A0MQS1;Q53H96-2;B5MD87	4;4;4;3	4;4;4;3	4;4;4;3	Pyrroline-5-carboxylate reductase 3;Pyrroline-5-carboxylate reductase	PYCRL	sp|Q53H96|P5CR3_HUMAN Pyrroline-5-carboxylate reductase 3 OS=Homo sapiens OX=9606 GN=PYCR3 PE=1 SV=3;tr|A0A0A0MQS1|A0A0A0MQS1_HUMAN Pyrroline-5-carboxylate reductase OS=Homo sapiens OX=9606 GN=PYCR3 PE=1 SV=1;sp|Q53H96-2|P5CR3_HUMAN Isoform 2 of Pyrroline-	4	4	4	4	0	0	0	0	1	0	0	0	1	0	4	0	0	0	0	0	1	0	0	0	1	0	4	0	0	0	0	0	1	0	0	0	1	0	4	0	22.3
150	Q9BV38;U3KQC1;A0A0A0MQU0;K7EIR0;K7EML4;A0A087X237;K7EKX5	Q9BV38;U3KQC1;A0A0A0MQU0;K7EIR0;K7EML4	8;8;8;7;4;2;2	8;8;8;7;4;2;2	8;8;8;7;4;2;2	WD repeat-containing protein 18	WDR18	sp|Q9BV38|WDR18_HUMAN WD repeat-containing protein 18 OS=Homo sapiens OX=9606 GN=WDR18 PE=1 SV=2;tr|U3KQC1|U3KQC1_HUMAN WD repeat-containing protein 18 (Fragment) OS=Homo sapiens OX=9606 GN=WDR18 PE=1 SV=1;tr|A0A0A0MQU0|A0A0A0MQU0_HUMAN WD repeat-containin	7	8	8	8	0	4	0	5	0	5	1	0	1	1	4	1	0	4	0	5	0	5	1	0	1	1	4	1	0	4	0	5	0	5	1	0	1	1	4	1	21.3
151	A0A0A0MTK8;P20823-7;P20823-2;P20823-3;F5H0K0;P20823;A0A0A0MQU7;U3KQS6;P20823-6;P20823-5;H0YND5;E0YMI9;A0A087WYP0;P20823-4;Q6NT76;Q6NT76-2;H0YKJ1;E5RGZ2;Q6NT76-3;Q6NT76-5	A0A0A0MTK8;P20823-7;P20823-2;P20823-3;F5H0K0;P20823;A0A0A0MQU7;U3KQS6;P20823-6;P20823-5;H0YND5;E0YMI9	6;6;6;6;6;6;6;6;5;4;4;3;2;2;1;1;1;1;1;1	4;4;4;4;4;4;4;4;3;3;3;2;1;1;0;0;0;0;0;0	4;4;4;4;4;4;4;4;3;3;3;2;1;1;0;0;0;0;0;0	Hepatocyte nuclear factor 1-alpha	HNF1A	tr|A0A0A0MTK8|A0A0A0MTK8_HUMAN Hepatocyte nuclear factor 1-alpha OS=Homo sapiens OX=9606 GN=HNF1A PE=1 SV=1;sp|P20823-7|HNF1A_HUMAN Isoform 7 of Hepatocyte nuclear factor 1-alpha OS=Homo sapiens OX=9606 GN=HNF1A;sp|P20823-2|HNF1A_HUMAN Isoform B of Hepatoc	20	6	4	4	0	0	0	4	0	0	0	1	0	1	0	2	0	0	0	4	0	0	0	0	0	0	0	0	0	0	0	4	0	0	0	0	0	0	0	0	13.6
152	Q9UPS6;A0A0A0MQV9;Q9UPS6-2	Q9UPS6;A0A0A0MQV9;Q9UPS6-2	4;4;4	3;3;3	3;3;3	Histone-lysine N-methyltransferase SETD1B;Histone-lysine N-methyltransferase	SETD1B	sp|Q9UPS6|SET1B_HUMAN Histone-lysine N-methyltransferase SETD1B OS=Homo sapiens OX=9606 GN=SETD1B PE=1 SV=3;tr|A0A0A0MQV9|A0A0A0MQV9_HUMAN Histone-lysine N-methyltransferase SETD1B OS=Homo sapiens OX=9606 GN=SETD1B PE=1 SV=1;sp|Q9UPS6-2|SET1B_HUMAN Isoform	3	4	3	3	0	1	2	1	0	2	0	0	0	1	0	1	0	1	2	0	0	1	0	0	0	0	0	0	0	1	2	0	0	1	0	0	0	0	0	0	3.3
153	Q9P2K5;Q9P2K5-2;A0A0A0MQW0;A0A0A0MR39;A0A087WUT0;Q9P2K5-3;H0YKS1;A0A087WWC8;A0A0C4DGV1;H0YN19;Q9P2K5-4	Q9P2K5;Q9P2K5-2;A0A0A0MQW0;A0A0A0MR39;A0A087WUT0	5;5;5;5;3;2;2;2;2;2;2	5;5;5;5;3;2;2;2;2;2;2	5;5;5;5;3;2;2;2;2;2;2	Myelin expression factor 2	MYEF2	sp|Q9P2K5|MYEF2_HUMAN Myelin expression factor 2 OS=Homo sapiens OX=9606 GN=MYEF2 PE=1 SV=3;sp|Q9P2K5-2|MYEF2_HUMAN Isoform 2 of Myelin expression factor 2 OS=Homo sapiens OX=9606 GN=MYEF2;tr|A0A0A0MQW0|A0A0A0MQW0_HUMAN Myelin expression factor 2 OS=Homo s	11	5	5	5	0	0	0	0	0	0	0	1	0	4	0	0	0	0	0	0	0	0	0	1	0	4	0	0	0	0	0	0	0	0	0	1	0	4	0	0	11.7
154	Q8IVT5;A8MY87;A0A2R8Y4X0;A0A0A0MQW1;A0A2R8Y5H9;Q8IVT5-4;Q8IVT5-3;Q8IVT5-2;J3QSG8;J3QQL4	Q8IVT5;A8MY87;A0A2R8Y4X0;A0A0A0MQW1;A0A2R8Y5H9;Q8IVT5-4;Q8IVT5-3;Q8IVT5-2;J3QSG8;J3QQL4	2;2;2;2;2;2;2;2;1;1	2;2;2;2;2;2;2;2;1;1	2;2;2;2;2;2;2;2;1;1	Kinase suppressor of Ras 1	KSR1	sp|Q8IVT5|KSR1_HUMAN Kinase suppressor of Ras 1 OS=Homo sapiens OX=9606 GN=KSR1 PE=1 SV=3;tr|A8MY87|A8MY87_HUMAN Kinase suppressor of Ras 1 (Fragment) OS=Homo sapiens OX=9606 GN=KSR1 PE=1 SV=2;tr|A0A2R8Y4X0|A0A2R8Y4X0_HUMAN Kinase suppressor of Ras 1 OS=Ho	10	2	2	2	0	0	2	0	0	0	0	0	0	0	0	0	0	0	2	0	0	0	0	0	0	0	0	0	0	0	2	0	0	0	0	0	0	0	0	0	3.5
155	Q9NR56;C9JP00;A0A0A0MQX8;Q9NR56-3;Q9NR56-4;Q9NR56-7;Q9NR56-6;Q9NR56-2;Q9NR56-5;H7C4T5;Q86VM6;C9JCX1;H7C4Y1	Q9NR56;C9JP00;A0A0A0MQX8;Q9NR56-3;Q9NR56-4;Q9NR56-7;Q9NR56-6;Q9NR56-2;Q9NR56-5;H7C4T5;Q86VM6	6;6;6;4;4;4;4;4;4;3;3;1;1	3;3;3;1;1;1;1;1;1;0;2;0;0	3;3;3;1;1;1;1;1;1;0;2;0;0	Muscleblind-like protein 1	MBNL1	sp|Q9NR56|MBNL1_HUMAN Muscleblind-like protein 1 OS=Homo sapiens OX=9606 GN=MBNL1 PE=1 SV=2;tr|C9JP00|C9JP00_HUMAN Muscleblind-like protein 1 OS=Homo sapiens OX=9606 GN=MBNL1 PE=1 SV=1;tr|A0A0A0MQX8|A0A0A0MQX8_HUMAN Muscleblind-like protein 1 OS=Homo sapie	13	6	3	3	0	4	0	3	0	2	0	3	0	3	0	2	0	3	0	1	0	1	0	1	0	2	0	1	0	3	0	1	0	1	0	1	0	2	0	1	22.4
156	P47736;P47736-2;F2Z357;A0A0A0MQY8;J3KPC5;X6R8W7;P47736-4;P47736-3	P47736;P47736-2;F2Z357;A0A0A0MQY8;J3KPC5;X6R8W7;P47736-4;P47736-3	5;5;5;5;5;5;5;4	5;5;5;5;5;5;5;4	5;5;5;5;5;5;5;4	Rap1 GTPase-activating protein 1	RAP1GAP	sp|P47736|RPGP1_HUMAN Rap1 GTPase-activating protein 1 OS=Homo sapiens OX=9606 GN=RAP1GAP PE=1 SV=2;sp|P47736-2|RPGP1_HUMAN Isoform 2 of Rap1 GTPase-activating protein 1 OS=Homo sapiens OX=9606 GN=RAP1GAP;tr|F2Z357|F2Z357_HUMAN Rap1 GTPase-activating prote	8	5	5	5	0	0	0	0	0	0	0	0	0	0	5	0	0	0	0	0	0	0	0	0	0	0	5	0	0	0	0	0	0	0	0	0	0	0	5	0	12.5
157	P45880;A0A0A0MR02;P45880-1;Q5JSD2;Q5JSD1;A2A3S1	P45880;A0A0A0MR02;P45880-1;Q5JSD2;Q5JSD1	17;17;15;11;11;5	17;17;15;11;11;5	2;2;0;2;2;0	Voltage-dependent anion-selective channel protein 2	VDAC2	sp|P45880|VDAC2_HUMAN Voltage-dependent anion-selective channel protein 2 OS=Homo sapiens OX=9606 GN=VDAC2 PE=1 SV=2;tr|A0A0A0MR02|A0A0A0MR02_HUMAN Outer mitochondrial membrane protein porin 2 (Fragment) OS=Homo sapiens OX=9606 GN=VDAC2 PE=1 SV=1;sp|P45880	6	17	17	2	11	7	17	7	8	6	3	5	9	4	3	5	11	7	17	7	8	6	3	5	9	4	3	5	0	0	2	0	0	0	0	0	0	0	0	0	68
158	Q9BVC4;Q9BVC4-4;H3BR38;H3BM50;H3BPU5;H3BR25;H3BPT1;H3BN58;H3BSZ4;A0A0A0MR05	Q9BVC4;Q9BVC4-4;H3BR38;H3BM50;H3BPU5;H3BR25;H3BPT1;H3BN58;H3BSZ4;A0A0A0MR05	1;1;1;1;1;1;1;1;1;1	1;1;1;1;1;1;1;1;1;1	1;1;1;1;1;1;1;1;1;1	Target of rapamycin complex subunit LST8	MLST8	sp|Q9BVC4|LST8_HUMAN Target of rapamycin complex subunit LST8 OS=Homo sapiens OX=9606 GN=MLST8 PE=1 SV=1;sp|Q9BVC4-4|LST8_HUMAN Isoform 3 of Target of rapamycin complex subunit LST8 OS=Homo sapiens OX=9606 GN=MLST8;tr|H3BR38|H3BR38_HUMAN Target of rapamyci	10	1	1	1	0	0	1	0	0	0	0	0	0	0	0	0	0	0	1	0	0	0	0	0	0	0	0	0	0	0	1	0	0	0	0	0	0	0	0	0	5.5
159	P43378;A0A0A0MR09;H3BQT6	P43378;A0A0A0MR09	7;7;1	7;7;1	7;7;1	Tyrosine-protein phosphatase non-receptor type 9;Protein-tyrosine-phosphatase	PTPN9	sp|P43378|PTN9_HUMAN Tyrosine-protein phosphatase non-receptor type 9 OS=Homo sapiens OX=9606 GN=PTPN9 PE=1 SV=1;tr|A0A0A0MR09|A0A0A0MR09_HUMAN Tyrosine-protein phosphatase non-receptor type 9 OS=Homo sapiens OX=9606 GN=PTPN9 PE=1 SV=1	3	7	7	7	0	0	1	0	0	0	4	0	1	0	2	0	0	0	1	0	0	0	4	0	1	0	2	0	0	0	1	0	0	0	4	0	1	0	2	0	15.3
160	Q13619;A0A0A0MR50;Q13619-2;Q13620-1;Q13620;A0A669KAX4;K4DI93;Q13620-3;A0A087WWN2	Q13619;A0A0A0MR50;Q13619-2;Q13620-1;Q13620;A0A669KAX4;K4DI93;Q13620-3	5;5;5;3;3;3;3;3;1	5;5;5;3;3;3;3;3;1	5;5;5;3;3;3;3;3;1	Cullin-4A;Cullin-4B	CUL4A;CUL4B	sp|Q13619|CUL4A_HUMAN Cullin-4A OS=Homo sapiens OX=9606 GN=CUL4A PE=1 SV=3;tr|A0A0A0MR50|A0A0A0MR50_HUMAN Cullin-4A OS=Homo sapiens OX=9606 GN=CUL4A PE=1 SV=1;sp|Q13619-2|CUL4A_HUMAN Isoform 2 of Cullin-4A OS=Homo sapiens OX=9606 GN=CUL4A;sp|Q13620-1|CUL4B	9	5	5	5	0	0	2	1	0	1	0	0	1	5	1	0	0	0	2	1	0	1	0	0	1	5	1	0	0	0	2	1	0	1	0	0	1	5	1	0	6.9
161	O60427;A0A0A0MR51;F5H3P6;H0YB97;F5H3U5;H7C2V0;O60427-2	O60427;A0A0A0MR51;F5H3P6;H0YB97;F5H3U5;H7C2V0;O60427-2	2;2;1;1;1;1;1	2;2;1;1;1;1;1	2;2;1;1;1;1;1	Fatty acid desaturase 1	FADS1	sp|O60427|FADS1_HUMAN Acyl-CoA (8-3)-desaturase OS=Homo sapiens OX=9606 GN=FADS1 PE=1 SV=3;tr|A0A0A0MR51|A0A0A0MR51_HUMAN Acyl-CoA (8-3)-desaturase OS=Homo sapiens OX=9606 GN=FADS1 PE=1 SV=1;tr|F5H3P6|F5H3P6_HUMAN Acyl-CoA (8-3)-desaturase OS=Homo sapiens	7	2	2	2	0	0	2	0	0	0	0	0	0	0	0	0	0	0	2	0	0	0	0	0	0	0	0	0	0	0	2	0	0	0	0	0	0	0	0	0	5.4
162	Q8TB72;Q8TB72-4;Q8TB72-3;A0A0C4DG68;A0A0A0MR59;Q8TB72-2	Q8TB72;Q8TB72-4;Q8TB72-3;A0A0C4DG68;A0A0A0MR59;Q8TB72-2	4;4;4;4;4;4	1;1;1;1;1;1	1;1;1;1;1;1	Pumilio homolog 2	PUM2	sp|Q8TB72|PUM2_HUMAN Pumilio homolog 2 OS=Homo sapiens OX=9606 GN=PUM2 PE=1 SV=2;sp|Q8TB72-4|PUM2_HUMAN Isoform 4 of Pumilio homolog 2 OS=Homo sapiens OX=9606 GN=PUM2;sp|Q8TB72-3|PUM2_HUMAN Isoform 3 of Pumilio homolog 2 OS=Homo sapiens OX=9606 GN=PUM2;tr|	6	4	1	1	3	2	2	1	3	1	3	3	1	2	3	2	0	0	1	0	0	0	0	1	1	0	0	0	0	0	1	0	0	0	0	1	1	0	0	0	4.3
163	Q8WXG6;Q8WXG6-3;Q8WXG6-2;A0A0U1RR25;A0A0A0MRB5;Q8WXG6-8;Q8WXG6-5;Q8WXG6-4	Q8WXG6;Q8WXG6-3;Q8WXG6-2;A0A0U1RR25;A0A0A0MRB5;Q8WXG6-8;Q8WXG6-5;Q8WXG6-4	1;1;1;1;1;1;1;1	1;1;1;1;1;1;1;1	1;1;1;1;1;1;1;1	MAP kinase-activating death domain protein	MADD	sp|Q8WXG6|MADD_HUMAN MAP kinase-activating death domain protein OS=Homo sapiens OX=9606 GN=MADD PE=1 SV=2;sp|Q8WXG6-3|MADD_HUMAN Isoform 3 of MAP kinase-activating death domain protein OS=Homo sapiens OX=9606 GN=MADD;sp|Q8WXG6-2|MADD_HUMAN Isoform 2 of MAP	8	1	1	1	0	0	0	0	0	0	0	0	1	0	0	0	0	0	0	0	0	0	0	0	1	0	0	0	0	0	0	0	0	0	0	0	1	0	0	0	0.8
164	Q86YR5;A0A0A0MSK4;A0A0A0MRC4;Q86YR5-4;Q86YR5-2;A0A087WVF5;Q86YR5-3	Q86YR5;A0A0A0MSK4;A0A0A0MRC4;Q86YR5-4	5;5;5;5;2;1;1	5;5;5;5;2;1;1	5;5;5;5;2;1;1	G-protein-signaling modulator 1	GPSM1	sp|Q86YR5|GPSM1_HUMAN G-protein-signaling modulator 1 OS=Homo sapiens OX=9606 GN=GPSM1 PE=1 SV=2;tr|A0A0A0MSK4|A0A0A0MSK4_HUMAN G-protein-signaling modulator 1 OS=Homo sapiens OX=9606 GN=GPSM1 PE=1 SV=1;tr|A0A0A0MRC4|A0A0A0MRC4_HUMAN G-protein-signaling mo	7	5	5	5	0	0	0	0	0	0	0	0	0	0	5	0	0	0	0	0	0	0	0	0	0	0	5	0	0	0	0	0	0	0	0	0	0	0	5	0	12.1
165	P05067;P05067-4;P05067-8;A0A0A0MRG2;E9PG40;P05067-10;P05067-6;P05067-11;P05067-3;P05067-5;P05067-7;P05067-9;H7C0V9;P05067-2	P05067;P05067-4;P05067-8;A0A0A0MRG2;E9PG40;P05067-10;P05067-6;P05067-11;P05067-3;P05067-5;P05067-7;P05067-9;H7C0V9	4;4;4;4;4;4;4;4;3;3;3;3;2;1	4;4;4;4;4;4;4;4;3;3;3;3;2;1	4;4;4;4;4;4;4;4;3;3;3;3;2;1	Amyloid beta A4 protein;N-APP;Soluble APP-alpha;Soluble APP-beta;C99;Beta-amyloid protein 42;Beta-amyloid protein 40;C83;P3(42);P3(40);C80;Gamma-secretase C-terminal fragment 59;Gamma-secretase C-terminal fragment 57;Gamma-secretase C-terminal fragment 50;C31	APP	sp|P05067|A4_HUMAN Amyloid-beta precursor protein OS=Homo sapiens OX=9606 GN=APP PE=1 SV=3;sp|P05067-4|A4_HUMAN Isoform APP695 of Amyloid-beta precursor protein OS=Homo sapiens OX=9606 GN=APP;sp|P05067-8|A4_HUMAN Isoform APP751 of Amyloid-beta precursor pr	14	4	4	4	0	0	0	0	0	0	0	0	4	0	0	0	0	0	0	0	0	0	0	0	4	0	0	0	0	0	0	0	0	0	0	0	4	0	0	0	11.8
166	Q9Y2W7;A0A0A0MRH3;Q9Y2W7-3;Q9Y2W7-2	Q9Y2W7;A0A0A0MRH3;Q9Y2W7-3;Q9Y2W7-2	1;1;1;1	1;1;1;1	1;1;1;1	Calsenilin	KCNIP3	sp|Q9Y2W7|CSEN_HUMAN Calsenilin OS=Homo sapiens OX=9606 GN=KCNIP3 PE=1 SV=1;tr|A0A0A0MRH3|A0A0A0MRH3_HUMAN Calsenilin OS=Homo sapiens OX=9606 GN=KCNIP3 PE=1 SV=1;sp|Q9Y2W7-3|CSEN_HUMAN Isoform 3 of Calsenilin OS=Homo sapiens OX=9606 GN=KCNIP3;sp|Q9Y2W7-2|C	4	1	1	1	0	0	0	0	0	0	0	0	1	1	0	0	0	0	0	0	0	0	0	0	1	1	0	0	0	0	0	0	0	0	0	0	1	1	0	0	3.1
167	Q9UNH7;A0A0A0MRI2;Q9UNH7-2;G3V5X9;G3V2U1;H0YJF8;G3V4Z5	Q9UNH7;A0A0A0MRI2;Q9UNH7-2;G3V5X9	5;5;4;3;1;1;1	5;5;4;3;1;1;1	5;5;4;3;1;1;1	Sorting nexin-6;Sorting nexin-6, N-terminally processed	SNX6	sp|Q9UNH7|SNX6_HUMAN Sorting nexin-6 OS=Homo sapiens OX=9606 GN=SNX6 PE=1 SV=1;tr|A0A0A0MRI2|A0A0A0MRI2_HUMAN Sorting nexin OS=Homo sapiens OX=9606 GN=SNX6 PE=1 SV=1;sp|Q9UNH7-2|SNX6_HUMAN Isoform 2 of Sorting nexin-6 OS=Homo sapiens OX=9606 GN=SNX6;tr|G3V	7	5	5	5	0	0	4	0	0	0	0	0	2	0	0	0	0	0	4	0	0	0	0	0	2	0	0	0	0	0	4	0	0	0	0	0	2	0	0	0	15.8
168	Q9H2C2;A0A0A0MRI7;H7C484;H0YEB4;F6QB42;H7C0E7	Q9H2C2;A0A0A0MRI7;H7C484;H0YEB4;F6QB42;H7C0E7	4;4;4;3;3;3	4;4;4;3;3;3	4;4;4;3;3;3	Protein ARV1	ARV1	sp|Q9H2C2|ARV1_HUMAN Protein ARV1 OS=Homo sapiens OX=9606 GN=ARV1 PE=1 SV=1;tr|A0A0A0MRI7|A0A0A0MRI7_HUMAN Protein ARV1 OS=Homo sapiens OX=9606 GN=ARV1 PE=1 SV=1;tr|H7C484|H7C484_HUMAN Protein ARV1 (Fragment) OS=Homo sapiens OX=9606 GN=ARV1 PE=1 SV=1;tr|H0	6	4	4	4	0	0	2	0	0	0	0	0	2	0	0	0	0	0	2	0	0	0	0	0	2	0	0	0	0	0	2	0	0	0	0	0	2	0	0	0	22.5
169	P22061;A0A0A0MRJ6;P22061-2;F6S8N6;A0A3F2YNX8;F8WDT3;F8WAV5;F8WAX2;C9J0F2;H7C4X2	P22061;A0A0A0MRJ6;P22061-2;F6S8N6;A0A3F2YNX8	13;13;13;12;10;4;4;4;3;1	13;13;13;12;10;4;4;4;3;1	13;13;13;12;10;4;4;4;3;1	Protein-L-isoaspartate(D-aspartate) O-methyltransferase;Protein-L-isoaspartate O-methyltransferase	PCMT1	sp|P22061|PIMT_HUMAN Protein-L-isoaspartate(D-aspartate) O-methyltransferase OS=Homo sapiens OX=9606 GN=PCMT1 PE=1 SV=4;tr|A0A0A0MRJ6|A0A0A0MRJ6_HUMAN Protein-L-isoaspartate O-methyltransferase OS=Homo sapiens OX=9606 GN=PCMT1 PE=1 SV=1;sp|P22061-2|PIMT_HU	10	13	13	13	7	1	0	2	9	0	10	1	5	0	11	0	7	1	0	2	9	0	10	1	5	0	11	0	7	1	0	2	9	0	10	1	5	0	11	0	70.9
170	A0A0A0MRL7;P55210;Q5SVL2;A0A5F9ZHZ6;P55210-4;P55210-3	A0A0A0MRL7;P55210;Q5SVL2;A0A5F9ZHZ6;P55210-4;P55210-3	2;1;1;1;1;1	1;0;0;0;0;0	1;0;0;0;0;0	Caspase-7;Caspase-7 subunit p20;Caspase-7 subunit p11	CASP7	tr|A0A0A0MRL7|A0A0A0MRL7_HUMAN Caspase-7 OS=Homo sapiens OX=9606 GN=CASP7 PE=1 SV=1;sp|P55210|CASP7_HUMAN Caspase-7 OS=Homo sapiens OX=9606 GN=CASP7 PE=1 SV=1;tr|Q5SVL2|Q5SVL2_HUMAN Caspase-7 (Fragment) OS=Homo sapiens OX=9606 GN=CASP7 PE=1 SV=1;tr|A0A5F9Z	6	2	1	1	1	1	0	0	1	0	1	0	0	0	0	0	1	1	0	0	0	0	1	0	0	0	0	0	1	1	0	0	0	0	1	0	0	0	0	0	3.9
171	Q9UM54-6;A0A1Y0BRN3;A0A0A0MRM8;Q9UM54;Q9UM54-4;Q9UM54-1;Q9UM54-2;E7EW20;A0A590UJ40;Q9UM54-5;A0A590UJ75;A0A590UKB0;A0A0D9SGC1;A0A590UK22;A0A590UJY4;A0A590UK86;A0A5F9ZI03;A0A590UK71;A0A590UJW9;Q5JVM0	Q9UM54-6;A0A1Y0BRN3;A0A0A0MRM8;Q9UM54;Q9UM54-4;Q9UM54-1;Q9UM54-2;E7EW20;A0A590UJ40;Q9UM54-5;A0A590UJ75;A0A590UKB0;A0A0D9SGC1;A0A590UK22;A0A590UJY4;A0A590UK86;A0A5F9ZI03;A0A590UK71	19;19;19;18;18;18;18;18;18;18;15;15;15;14;13;13;13;13;2;1	19;19;19;18;18;18;18;18;18;18;15;15;15;14;13;13;13;13;2;1	19;19;19;18;18;18;18;18;18;18;15;15;15;14;13;13;13;13;2;1	Unconventional myosin-VI	MYO6	sp|Q9UM54-6|MYO6_HUMAN Isoform 6 of Unconventional myosin-VI OS=Homo sapiens OX=9606 GN=MYO6;tr|A0A1Y0BRN3|A0A1Y0BRN3_HUMAN Unconventional myosin-6 OS=Homo sapiens OX=9606 GN=MYO6 PE=1 SV=1;tr|A0A0A0MRM8|A0A0A0MRM8_HUMAN Unconventional myosin-6 OS=Homo sap	20	19	19	19	0	4	0	5	0	3	0	1	1	18	0	1	0	4	0	5	0	3	0	1	1	18	0	1	0	4	0	5	0	3	0	1	1	18	0	1	21.2
172	Q8IWC1;A0A0A0MRP0;Q8IWC1-2;Q8IWC1-4;Q8IWC1-3	Q8IWC1;A0A0A0MRP0;Q8IWC1-2;Q8IWC1-4;Q8IWC1-3	3;3;3;3;2	3;3;3;3;2	3;3;3;3;2	MAP7 domain-containing protein 3	MAP7D3	sp|Q8IWC1|MA7D3_HUMAN MAP7 domain-containing protein 3 OS=Homo sapiens OX=9606 GN=MAP7D3 PE=1 SV=2;tr|A0A0A0MRP0|A0A0A0MRP0_HUMAN MAP7 domain-containing protein 3 (Fragment) OS=Homo sapiens OX=9606 GN=MAP7D3 PE=1 SV=1;sp|Q8IWC1-2|MA7D3_HUMAN Isoform 2 of M	5	3	3	3	0	0	3	0	0	0	0	0	0	0	0	0	0	0	3	0	0	0	0	0	0	0	0	0	0	0	3	0	0	0	0	0	0	0	0	0	4.6
173	A0A0A0MRP6;P28370-2	A0A0A0MRP6;P28370-2	42;42	1;1	1;1	Probable global transcription activator SNF2L1	SMARCA1	tr|A0A0A0MRP6|A0A0A0MRP6_HUMAN Probable global transcription activator SNF2L1 OS=Homo sapiens OX=9606 GN=SMARCA1 PE=1 SV=1;sp|P28370-2|SMCA1_HUMAN Isoform 2 of Probable global transcription activator SNF2L1 OS=Homo sapiens OX=9606 GN=SMARCA1	2	42	1	1	1	22	18	26	0	27	0	6	13	11	0	7	0	0	1	0	0	0	0	0	0	0	0	0	0	0	1	0	0	0	0	0	0	0	0	0	42.2
174	Q5VV52;A0A0A0MRR1;Q5VV50;Q5VV52-3;Q5VV51	Q5VV52;A0A0A0MRR1;Q5VV50;Q5VV52-3	4;4;4;4;1	4;4;4;4;1	4;4;4;4;1	Zinc finger protein 691	ZNF691	sp|Q5VV52|ZN691_HUMAN Zinc finger protein 691 OS=Homo sapiens OX=9606 GN=ZNF691 PE=1 SV=2;tr|A0A0A0MRR1|A0A0A0MRR1_HUMAN Zinc finger protein 691 (Fragment) OS=Homo sapiens OX=9606 GN=ZNF691 PE=1 SV=1;tr|Q5VV50|Q5VV50_HUMAN Zinc finger protein 691 OS=Homo s	5	4	4	4	0	2	0	4	0	1	0	1	0	2	0	1	0	2	0	4	0	1	0	1	0	2	0	1	0	2	0	4	0	1	0	1	0	2	0	1	17.8
175	Q7Z7C8;C9J7M8;A0A0A0MRR3;Q7Z7C8-2;Q7Z7C8-4	Q7Z7C8;C9J7M8;A0A0A0MRR3;Q7Z7C8-2;Q7Z7C8-4	1;1;1;1;1	1;1;1;1;1	1;1;1;1;1	Transcription initiation factor TFIID subunit 8	TAF8	sp|Q7Z7C8|TAF8_HUMAN Transcription initiation factor TFIID subunit 8 OS=Homo sapiens OX=9606 GN=TAF8 PE=1 SV=1;tr|C9J7M8|C9J7M8_HUMAN Transcription initiation factor TFIID subunit 8 OS=Homo sapiens OX=9606 GN=TAF8 PE=1 SV=1;tr|A0A0A0MRR3|A0A0A0MRR3_HUMAN T	5	1	1	1	0	0	0	0	0	1	0	0	0	0	0	0	0	0	0	0	0	1	0	0	0	0	0	0	0	0	0	0	0	1	0	0	0	0	0	0	4.8
176	P09234;A0A0A0MRR7;Q5TAL2	P09234;A0A0A0MRR7	3;3;1	3;3;1	3;3;1	U1 small nuclear ribonucleoprotein C	SNRPC	sp|P09234|RU1C_HUMAN U1 small nuclear ribonucleoprotein C OS=Homo sapiens OX=9606 GN=SNRPC PE=1 SV=1;tr|A0A0A0MRR7|A0A0A0MRR7_HUMAN U1 small nuclear ribonucleoprotein C OS=Homo sapiens OX=9606 GN=SNRPC PE=1 SV=1	3	3	3	3	0	2	1	3	0	2	1	0	1	3	0	0	0	2	1	3	0	2	1	0	1	3	0	0	0	2	1	3	0	2	1	0	1	3	0	0	24.5
177	A0A0A0MRV2;Q9BY08-4;Q9BY08-3;Q9BY08-5;Q9BY08-2;Q9BY08	A0A0A0MRV2;Q9BY08-4;Q9BY08-3;Q9BY08-5;Q9BY08-2;Q9BY08	1;1;1;1;1;1	1;1;1;1;1;1	1;1;1;1;1;1	Emopamil-binding protein-like	EBPL	tr|A0A0A0MRV2|A0A0A0MRV2_HUMAN Emopamil binding protein-like, isoform CRA_b OS=Homo sapiens OX=9606 GN=EBPL PE=1 SV=1;sp|Q9BY08-4|EBPL_HUMAN Isoform 4 of Emopamil-binding protein-like OS=Homo sapiens OX=9606 GN=EBPL;sp|Q9BY08-3|EBPL_HUMAN Isoform 3 of Emop	6	1	1	1	0	0	0	0	0	0	0	1	0	0	0	0	0	0	0	0	0	0	0	1	0	0	0	0	0	0	0	0	0	0	0	1	0	0	0	0	22.4
178	Q96HY6;A0A0A0MRX2;Q96HY6-2	Q96HY6;A0A0A0MRX2;Q96HY6-2	1;1;1	1;1;1	1;1;1	DDRGK domain-containing protein 1	DDRGK1	sp|Q96HY6|DDRGK_HUMAN DDRGK domain-containing protein 1 OS=Homo sapiens OX=9606 GN=DDRGK1 PE=1 SV=2;tr|A0A0A0MRX2|A0A0A0MRX2_HUMAN DDRGK domain-containing protein 1 OS=Homo sapiens OX=9606 GN=DDRGK1 PE=1 SV=1;sp|Q96HY6-2|DDRGK_HUMAN Isoform 2 of DDRGK doma	3	1	1	1	0	0	1	0	0	0	0	0	0	0	0	0	0	0	1	0	0	0	0	0	0	0	0	0	0	0	1	0	0	0	0	0	0	0	0	0	4.5
179	Q15025;E7EMV7;A0A0A0MRZ4;Q15025-7;Q15025-8;Q15025-5;Q15025-6;Q15025-4;Q15025-3;Q15025-2;E7EW15;H0YC17	Q15025;E7EMV7;A0A0A0MRZ4;Q15025-7;Q15025-8;Q15025-5;Q15025-6;Q15025-4;Q15025-3;Q15025-2;E7EW15	8;8;8;8;8;8;8;8;8;8;5;3	8;8;8;8;8;8;8;8;8;8;5;3	8;8;8;8;8;8;8;8;8;8;5;3	TNFAIP3-interacting protein 1	TNIP1	sp|Q15025|TNIP1_HUMAN TNFAIP3-interacting protein 1 OS=Homo sapiens OX=9606 GN=TNIP1 PE=1 SV=2;tr|E7EMV7|E7EMV7_HUMAN TNFAIP3-interacting protein 1 OS=Homo sapiens OX=9606 GN=TNIP1 PE=1 SV=1;tr|A0A0A0MRZ4|A0A0A0MRZ4_HUMAN TNFAIP3-interacting protein 1 OS=H	12	8	8	8	4	0	1	0	8	0	1	0	0	0	2	0	4	0	1	0	8	0	1	0	0	0	2	0	4	0	1	0	8	0	1	0	0	0	2	0	15.6
180	P01857;A0A0A0MS08;A0A0A0MS07	P01857;A0A0A0MS08;A0A0A0MS07	6;6;4	6;6;4	3;3;2	Ig gamma-1 chain C region	IGHG1	sp|P01857|IGHG1_HUMAN Immunoglobulin heavy constant gamma 1 OS=Homo sapiens OX=9606 GN=IGHG1 PE=1 SV=1;tr|A0A0A0MS08|A0A0A0MS08_HUMAN Immunoglobulin heavy constant gamma 1 (Fragment) OS=Homo sapiens OX=9606 GN=IGHG1 PE=1 SV=1;tr|A0A0A0MS07|A0A0A0MS07_HUMAN	3	6	6	3	6	0	0	0	0	1	0	0	0	0	0	1	6	0	0	0	0	1	0	0	0	0	0	1	3	0	0	0	0	0	0	0	0	0	0	0	22.4
181	A0A0A0MS14	A0A0A0MS14	1	1	1		IGHV1-45	sp|A0A0A0MS14|HV145_HUMAN Immunoglobulin heavy variable 1-45 OS=Homo sapiens OX=9606 GN=IGHV1-45 PE=3 SV=1	1	1	1	1	1	1	0	0	0	0	1	1	0	0	0	0	1	1	0	0	0	0	1	1	0	0	0	0	1	1	0	0	0	0	1	1	0	0	0	0	9.4
182	Q9H9E3;A0A6I8PIQ6;A0A0A0MS45;J3KNI1;Q9H9E3-3;H3BQB2;Q9H9E3-2	Q9H9E3;A0A6I8PIQ6;A0A0A0MS45;J3KNI1;Q9H9E3-3	3;3;3;3;3;1;1	3;3;3;3;3;1;1	3;3;3;3;3;1;1	Conserved oligomeric Golgi complex subunit 4	COG4	sp|Q9H9E3|COG4_HUMAN Conserved oligomeric Golgi complex subunit 4 OS=Homo sapiens OX=9606 GN=COG4 PE=1 SV=3;tr|A0A6I8PIQ6|A0A6I8PIQ6_HUMAN Conserved oligomeric Golgi complex subunit 4 OS=Homo sapiens OX=9606 GN=COG4 PE=4 SV=1;tr|A0A0A0MS45|A0A0A0MS45_HUMAN	7	3	3	3	0	0	2	0	0	0	0	0	1	0	1	0	0	0	2	0	0	0	0	0	1	0	1	0	0	0	2	0	0	0	0	0	1	0	1	0	5.5
183	Q6ZRS2;A0A0A0MS59;A0A0C4DFX4;Q6ZRS2-3;Q6ZRS2-2;A0A087X0E3	Q6ZRS2;A0A0A0MS59;A0A0C4DFX4;Q6ZRS2-3;Q6ZRS2-2;A0A087X0E3	8;8;8;8;8;5	7;7;7;7;7;4	7;7;7;7;7;4	Helicase SRCAP	SRCAP	sp|Q6ZRS2|SRCAP_HUMAN Helicase SRCAP OS=Homo sapiens OX=9606 GN=SRCAP PE=1 SV=3;tr|A0A0A0MS59|A0A0A0MS59_HUMAN Helicase SRCAP OS=Homo sapiens OX=9606 GN=SRCAP PE=1 SV=1;tr|A0A0C4DFX4|A0A0C4DFX4_HUMAN Uncharacterized protein (Fragment) OS=Homo sapiens OX=96	6	8	7	7	0	2	0	2	0	3	0	1	0	5	0	1	0	1	0	1	0	2	0	0	0	5	0	0	0	1	0	1	0	2	0	0	0	5	0	0	2.8
184	P33527;A0A0A0MS99;I3L4X2;P33527-6;P33527-4;P33527-2;P33527-9;P33527-8;P33527-7;P33527-5;P33527-3	P33527;A0A0A0MS99;I3L4X2;P33527-6;P33527-4;P33527-2;P33527-9;P33527-8;P33527-7;P33527-5;P33527-3	7;7;7;7;7;7;7;5;5;5;5	7;7;7;7;7;7;7;5;5;5;5	7;7;7;7;7;7;7;5;5;5;5	Multidrug resistance-associated protein 1	ABCC1	sp|P33527|MRP1_HUMAN Multidrug resistance-associated protein 1 OS=Homo sapiens OX=9606 GN=ABCC1 PE=1 SV=3;tr|A0A0A0MS99|A0A0A0MS99_HUMAN Multidrug resistance-associated protein 1 OS=Homo sapiens OX=9606 GN=ABCC1 PE=1 SV=1;tr|I3L4X2|I3L4X2_HUMAN Multidrug r	11	7	7	7	0	0	7	0	0	0	0	0	0	0	0	0	0	0	7	0	0	0	0	0	0	0	0	0	0	0	7	0	0	0	0	0	0	0	0	0	7.8
185	Q9UPT5;A0A0A0MSB8;Q9UPT5-2;Q9UPT5-5;Q9UPT5-1;Q9UPT5-6;A0A0A0MRE1;B4DJ07;Q9UPT5-4;B5MCY9;K7ERQ5;C9JKC2;C9JME6	Q9UPT5;A0A0A0MSB8;Q9UPT5-2;Q9UPT5-5;Q9UPT5-1;Q9UPT5-6;A0A0A0MRE1;B4DJ07	9;9;9;9;9;9;7;7;4;3;3;2;1	9;9;9;9;9;9;7;7;4;3;3;2;1	9;9;9;9;9;9;7;7;4;3;3;2;1	Exocyst complex component 7	EXOC7	sp|Q9UPT5|EXOC7_HUMAN Exocyst complex component 7 OS=Homo sapiens OX=9606 GN=EXOC7 PE=1 SV=3;tr|A0A0A0MSB8|A0A0A0MSB8_HUMAN Exocyst complex component 7 OS=Homo sapiens OX=9606 GN=EXOC7 PE=1 SV=1;sp|Q9UPT5-2|EXOC7_HUMAN Isoform 2 of Exocyst complex componen	13	9	9	9	0	0	7	0	0	0	0	0	5	0	0	0	0	0	7	0	0	0	0	0	5	0	0	0	0	0	7	0	0	0	0	0	5	0	0	0	18.8
186	Q8IXK0;B3KPJ4;A0A0A0MSI2;Q8IXK0-2;Q8IXK0-4;Q8IXK0-5	Q8IXK0;B3KPJ4;A0A0A0MSI2;Q8IXK0-2;Q8IXK0-4;Q8IXK0-5	7;7;7;7;7;7	7;7;7;7;7;7	0;0;0;0;0;0	Polyhomeotic-like protein 2	PHC2	sp|Q8IXK0|PHC2_HUMAN Polyhomeotic-like protein 2 OS=Homo sapiens OX=9606 GN=PHC2 PE=1 SV=1;tr|B3KPJ4|B3KPJ4_HUMAN Polyhomeotic-like protein 2 OS=Homo sapiens OX=9606 GN=PHC2 PE=1 SV=1;tr|A0A0A0MSI2|A0A0A0MSI2_HUMAN Polyhomeotic-like protein 2 OS=Homo sapie	6	7	7	0	0	1	4	3	0	1	0	0	2	5	0	0	0	1	4	3	0	1	0	0	2	5	0	0	0	0	0	0	0	0	0	0	0	0	0	0	7.9
187	Q15283;D6RBA9;A0A0A0MSJ9;Q15283-2	Q15283;D6RBA9;A0A0A0MSJ9;Q15283-2	1;1;1;1	1;1;1;1	1;1;1;1	Ras GTPase-activating protein 2	RASA2	sp|Q15283|RASA2_HUMAN Ras GTPase-activating protein 2 OS=Homo sapiens OX=9606 GN=RASA2 PE=1 SV=3;tr|D6RBA9|D6RBA9_HUMAN Ras GTPase-activating protein 2 OS=Homo sapiens OX=9606 GN=RASA2 PE=1 SV=1;tr|A0A0A0MSJ9|A0A0A0MSJ9_HUMAN Ras GTPase-activating protein	4	1	1	1	0	0	0	0	0	0	0	0	1	0	0	0	0	0	0	0	0	0	0	0	1	0	0	0	0	0	0	0	0	0	0	0	1	0	0	0	3.6
188	Q5JTV8;A0A0A0MSK5;H0YD16;H0Y4R4;H0YDU3	Q5JTV8;A0A0A0MSK5;H0YD16	8;8;4;3;2	1;1;1;0;1	1;1;1;0;1	Torsin-1A-interacting protein 1	TOR1AIP1	sp|Q5JTV8|TOIP1_HUMAN Torsin-1A-interacting protein 1 OS=Homo sapiens OX=9606 GN=TOR1AIP1 PE=1 SV=2;tr|A0A0A0MSK5|A0A0A0MSK5_HUMAN Torsin-1A-interacting protein 1 OS=Homo sapiens OX=9606 GN=TOR1AIP1 PE=1 SV=1;tr|H0YD16|H0YD16_HUMAN Torsin-1A-interacting pr	5	8	1	1	0	4	1	2	0	3	0	3	0	7	0	1	0	1	0	1	0	1	0	0	0	0	0	0	0	1	0	1	0	1	0	0	0	0	0	0	20.1
189	Q92598;O95757;D6RJ96;A0A0A0MSM0;E9PDE8;Q92598-2;Q92598-3;Q92598-4	Q92598;O95757;D6RJ96;A0A0A0MSM0;E9PDE8;Q92598-2;Q92598-3;Q92598-4	1;1;1;1;1;1;1;1	1;1;1;1;1;1;1;1	1;1;1;1;1;1;1;1	Heat shock protein 105 kDa;Heat shock 70 kDa protein 4L	HSPH1;HSPA4L	sp|Q92598|HS105_HUMAN Heat shock protein 105 kDa OS=Homo sapiens OX=9606 GN=HSPH1 PE=1 SV=1;sp|O95757|HS74L_HUMAN Heat shock 70 kDa protein 4L OS=Homo sapiens OX=9606 GN=HSPA4L PE=1 SV=3;tr|D6RJ96|D6RJ96_HUMAN Heat shock 70 kDa protein 4L (Fragment) OS=Hom	8	1	1	1	0	0	0	0	1	0	0	0	0	0	0	0	0	0	0	0	1	0	0	0	0	0	0	0	0	0	0	0	1	0	0	0	0	0	0	0	1.6
190	P13797;A0A0A0MSQ0;P13797-3;P13797-2;H7C4N2	P13797;A0A0A0MSQ0;P13797-3;P13797-2	4;4;4;4;1	1;1;1;1;1	1;1;1;1;1	Plastin-3	PLS3	sp|P13797|PLST_HUMAN Plastin-3 OS=Homo sapiens OX=9606 GN=PLS3 PE=1 SV=4;tr|A0A0A0MSQ0|A0A0A0MSQ0_HUMAN Plastin-3 OS=Homo sapiens OX=9606 GN=PLS3 PE=1 SV=1;sp|P13797-3|PLST_HUMAN Isoform 3 of Plastin-3 OS=Homo sapiens OX=9606 GN=PLS3;sp|P13797-2|PLST_HUMAN	5	4	1	1	3	0	0	0	0	0	1	0	0	0	2	0	0	0	0	0	0	0	0	0	0	0	1	0	0	0	0	0	0	0	0	0	0	0	1	0	8.7
191	P42330;A0A0A0MSS8;S4R3Z2;P42330-2;S4R3D5;P17516;A0A3B3IRI8	P42330;A0A0A0MSS8;S4R3Z2;P42330-2	16;16;15;9;6;4;2	8;8;7;5;2;0;2	8;8;7;5;2;0;2	Aldo-keto reductase family 1 member C3	AKR1C3	sp|P42330|AK1C3_HUMAN Aldo-keto reductase family 1 member C3 OS=Homo sapiens OX=9606 GN=AKR1C3 PE=1 SV=4;tr|A0A0A0MSS8|A0A0A0MSS8_HUMAN Aldo-keto reductase family 1 member C3 OS=Homo sapiens OX=9606 GN=AKR1C3 PE=1 SV=1;tr|S4R3Z2|S4R3Z2_HUMAN Aldo-keto redu	7	16	8	8	16	6	7	9	11	7	0	0	0	0	0	0	8	1	2	2	4	0	0	0	0	0	0	0	8	1	2	2	4	0	0	0	0	0	0	0	63.5
192	P02746;A0A0A0MSV6;D6R934	P02746;A0A0A0MSV6;D6R934	1;1;1	1;1;1	1;1;1	Complement C1q subcomponent subunit B	C1QB	sp|P02746|C1QB_HUMAN Complement C1q subcomponent subunit B OS=Homo sapiens OX=9606 GN=C1QB PE=1 SV=3;tr|A0A0A0MSV6|A0A0A0MSV6_HUMAN Complement C1q subcomponent subunit B (Fragment) OS=Homo sapiens OX=9606 GN=C1QB PE=1 SV=6;tr|D6R934|D6R934_HUMAN Complement	3	1	1	1	1	1	0	0	0	0	1	1	0	0	0	0	1	1	0	0	0	0	1	1	0	0	0	0	1	1	0	0	0	0	1	1	0	0	0	0	5.5
193	O15533;A0A0G2JKZ1;A2AB90;A0A0G2JH37;A0A0A0MSV9;O15533-2;O15533-3;Q6P1N7;C9JA35;A0A0A0MT98;O15533-4	O15533;A0A0G2JKZ1;A2AB90;A0A0G2JH37;A0A0A0MSV9;O15533-2;O15533-3;Q6P1N7	3;3;3;3;3;3;3;2;1;1;1	3;3;3;3;3;3;3;2;1;1;1	3;3;3;3;3;3;3;2;1;1;1	Tapasin	TAPBP	sp|O15533|TPSN_HUMAN Tapasin OS=Homo sapiens OX=9606 GN=TAPBP PE=1 SV=1;tr|A0A0G2JKZ1|A0A0G2JKZ1_HUMAN Tapasin OS=Homo sapiens OX=9606 GN=TAPBP PE=1 SV=1;tr|A2AB90|A2AB90_HUMAN Tapasin OS=Homo sapiens OX=9606 GN=TAPBP PE=1 SV=1;tr|A0A0G2JH37|A0A0G2JH37_HUM	11	3	3	3	0	0	3	0	0	0	0	0	0	0	0	0	0	0	3	0	0	0	0	0	0	0	0	0	0	0	3	0	0	0	0	0	0	0	0	0	15
194	Q13952;Q5T6K7;E9PI99;A0A0A0MT00;Q5T6K5;Q13952-6;Q13952-7;Q13952-2;Q13952-5;Q13952-3;E9PL11	Q13952;Q5T6K7;E9PI99;A0A0A0MT00;Q5T6K5;Q13952-6;Q13952-7;Q13952-2;Q13952-5;Q13952-3;E9PL11	2;2;2;2;2;2;2;2;2;2;1	2;2;2;2;2;2;2;2;2;2;1	2;2;2;2;2;2;2;2;2;2;1	Nuclear transcription factor Y subunit gamma	NFYC	sp|Q13952|NFYC_HUMAN Nuclear transcription factor Y subunit gamma OS=Homo sapiens OX=9606 GN=NFYC PE=1 SV=3;tr|Q5T6K7|Q5T6K7_HUMAN Nuclear transcription factor Y subunit gamma (Fragment) OS=Homo sapiens OX=9606 GN=NFYC PE=1 SV=1;tr|E9PI99|E9PI99_HUMAN Nucl	11	2	2	2	0	1	0	1	0	1	0	0	0	0	0	0	0	1	0	1	0	1	0	0	0	0	0	0	0	1	0	1	0	1	0	0	0	0	0	0	5.2
195	Q9UPN6;A0A0A0MT33;Q9UPN6-2	Q9UPN6;A0A0A0MT33;Q9UPN6-2	14;14;14	14;14;14	11;11;11	Protein SCAF8	SCAF8	sp|Q9UPN6|SCAF8_HUMAN SR-related and CTD-associated factor 8 OS=Homo sapiens OX=9606 GN=SCAF8 PE=1 SV=1;tr|A0A0A0MT33|A0A0A0MT33_HUMAN SR-related and CTD-associated factor 8 OS=Homo sapiens OX=9606 GN=SCAF8 PE=1 SV=1;sp|Q9UPN6-2|SCAF8_HUMAN Isoform 2 of SR	3	14	14	11	0	5	0	6	0	5	7	2	2	7	10	7	0	5	0	6	0	5	7	2	2	7	10	7	0	2	0	3	0	2	4	0	1	4	8	4	15.7
196	A0A0A0MT36;A0A0C4DH26	A0A0A0MT36;A0A0C4DH26	1;1	1;1	1;1		IGKV6D-21;IGKV6D-41	sp|A0A0A0MT36|KVD21_HUMAN Immunoglobulin kappa variable 6D-21 OS=Homo sapiens OX=9606 GN=IGKV6D-21 PE=3 SV=1;sp|A0A0C4DH26|KVD41_HUMAN Probable non-functional immunoglobulin kappa variable 6D-41 OS=Homo sapiens OX=9606 GN=IGKV6D-41 PE=5 SV=1	2	1	1	1	0	0	0	0	0	0	1	1	0	0	0	0	0	0	0	0	0	0	1	1	0	0	0	0	0	0	0	0	0	0	1	1	0	0	0	0	10.5
197	P19544-7;J3KNN9;A0A1W2PQQ0;H0Y7K5;A0A0A0MT54;P19544-8;P19544;P19544-2;H0Y3F0;P19544-3;P19544-4;H0YED9;A0A1W2PR07;P19544-9;P19544-6	P19544-7;J3KNN9;A0A1W2PQQ0;H0Y7K5;A0A0A0MT54;P19544-8;P19544;P19544-2;H0Y3F0;P19544-3;P19544-4	3;3;3;3;3;3;2;2;2;2;2;1;1;1;1	3;3;3;3;3;3;2;2;2;2;2;1;1;1;1	3;3;3;3;3;3;2;2;2;2;2;1;1;1;1	Wilms tumor protein	WT1	sp|P19544-7|WT1_HUMAN Isoform 7 of Wilms tumor protein OS=Homo sapiens OX=9606 GN=WT1;tr|J3KNN9|J3KNN9_HUMAN Wilms tumor protein OS=Homo sapiens OX=9606 GN=WT1 PE=1 SV=2;tr|A0A1W2PQQ0|A0A1W2PQQ0_HUMAN Wilms tumor protein OS=Homo sapiens OX=9606 GN=WT1 PE=1	15	3	3	3	0	1	1	0	0	2	0	0	0	0	0	0	0	1	1	0	0	2	0	0	0	0	0	0	0	1	1	0	0	2	0	0	0	0	0	0	10.9
198	Q8NI36;A0A0A0MTB8	Q8NI36;A0A0A0MTB8	12;12	12;12	12;12	WD repeat-containing protein 36	WDR36	sp|Q8NI36|WDR36_HUMAN WD repeat-containing protein 36 OS=Homo sapiens OX=9606 GN=WDR36 PE=1 SV=1;tr|A0A0A0MTB8|A0A0A0MTB8_HUMAN WD repeat-containing protein 36 OS=Homo sapiens OX=9606 GN=WDR36 PE=1 SV=1	2	12	12	12	0	4	6	7	0	2	0	0	0	2	0	0	0	4	6	7	0	2	0	0	0	2	0	0	0	4	6	7	0	2	0	0	0	2	0	0	16.6
199	A0A0A0MTR7;A0A0A0MTC1;Q63HN8;Q63HN8-4;Q63HN8-5;Q63HN8-6;I3L3H9	A0A0A0MTR7;A0A0A0MTC1;Q63HN8;Q63HN8-4	133;133;132;132;16;15;1	133;133;132;132;16;15;1	132;132;131;131;16;15;1	E3 ubiquitin-protein ligase RNF213	RNF213	tr|A0A0A0MTR7|A0A0A0MTR7_HUMAN E3 ubiquitin-protein ligase RNF213 OS=Homo sapiens OX=9606 GN=RNF213 PE=1 SV=1;tr|A0A0A0MTC1|A0A0A0MTC1_HUMAN E3 ubiquitin-protein ligase RNF213 OS=Homo sapiens OX=9606 GN=RNF213 PE=1 SV=1;sp|Q63HN8|RN213_HUMAN E3 ubiquitin-p	7	133	133	132	33	2	78	2	68	2	10	1	25	2	71	1	33	2	78	2	68	2	10	1	25	2	71	1	32	1	78	1	67	1	10	0	25	1	70	0	33.6
200	Q13418;A0A0A0MTH3;Q13418-2;Q13418-3;A0A087WWY6	Q13418;A0A0A0MTH3;Q13418-2;Q13418-3	12;12;12;9;3	12;12;12;9;3	12;12;12;9;3	Integrin-linked protein kinase	ILK	sp|Q13418|ILK_HUMAN Integrin-linked protein kinase OS=Homo sapiens OX=9606 GN=ILK PE=1 SV=2;tr|A0A0A0MTH3|A0A0A0MTH3_HUMAN Integrin-linked protein kinase OS=Homo sapiens OX=9606 GN=ILK PE=1 SV=1;sp|Q13418-2|ILK_HUMAN Isoform 2 of Integrin-linked protein ki	5	12	12	12	1	7	8	6	4	7	3	5	6	5	4	4	1	7	8	6	4	7	3	5	6	5	4	4	1	7	8	6	4	7	3	5	6	5	4	4	45.1
201	O14981;A0A0A0MTH9;O14981-2	O14981;A0A0A0MTH9	16;16;6	16;16;6	16;16;6	TATA-binding protein-associated factor 172	BTAF1	sp|O14981|BTAF1_HUMAN TATA-binding protein-associated factor 172 OS=Homo sapiens OX=9606 GN=BTAF1 PE=1 SV=2;tr|A0A0A0MTH9|A0A0A0MTH9_HUMAN TATA-binding protein-associated factor 172 OS=Homo sapiens OX=9606 GN=BTAF1 PE=1 SV=1	3	16	16	16	2	2	13	5	0	3	0	0	1	5	0	0	2	2	13	5	0	3	0	0	1	5	0	0	2	2	13	5	0	3	0	0	1	5	0	0	13
202	Q8IVL1-4;Q8IVL1-2;A0A0A0MTL4;Q8IVL1-3;Q8IVL1;Q8IVL1-10;Q8IVL1-11;Q8IVL1-12;Q8IVL1-9;Q8IVL1-8;Q8IVL1-5;Q8IVL1-13;A0A0A0MTE8;Q8IVL1-6;E9PNV5;Q8IVL1-7;Q8IVL0-2;Q8IVL0;Q8IVL0-3;H0YI14;A0A2R8YFX5;H0YHA8	Q8IVL1-4;Q8IVL1-2;A0A0A0MTL4;Q8IVL1-3;Q8IVL1;Q8IVL1-10;Q8IVL1-11;Q8IVL1-12;Q8IVL1-9;Q8IVL1-8;Q8IVL1-5;Q8IVL1-13;A0A0A0MTE8;Q8IVL1-6	28;28;28;28;27;27;27;27;27;27;27;27;27;18;12;12;2;2;2;2;2;2	28;28;28;28;27;27;27;27;27;27;27;27;27;18;12;12;2;2;2;2;2;2	28;28;28;28;27;27;27;27;27;27;27;27;27;18;12;12;2;2;2;2;2;2	Neuron navigator 2	NAV2	sp|Q8IVL1-4|NAV2_HUMAN Isoform 4 of Neuron navigator 2 OS=Homo sapiens OX=9606 GN=NAV2;sp|Q8IVL1-2|NAV2_HUMAN Isoform 2 of Neuron navigator 2 OS=Homo sapiens OX=9606 GN=NAV2;tr|A0A0A0MTL4|A0A0A0MTL4_HUMAN Neuron navigator 2 OS=Homo sapiens OX=9606 GN=NAV2	22	28	28	28	1	0	12	0	21	0	0	1	0	0	1	0	1	0	12	0	21	0	0	1	0	0	1	0	1	0	12	0	21	0	0	1	0	0	1	0	22
203	Q13309;A0A0A0MTL5;Q13309-2;D6R9R7	Q13309;A0A0A0MTL5;Q13309-2;D6R9R7	3;3;3;2	3;3;3;2	3;3;3;2	S-phase kinase-associated protein 2	SKP2	sp|Q13309|SKP2_HUMAN S-phase kinase-associated protein 2 OS=Homo sapiens OX=9606 GN=SKP2 PE=1 SV=2;tr|A0A0A0MTL5|A0A0A0MTL5_HUMAN S-phase kinase-associated protein 2 OS=Homo sapiens OX=9606 GN=SKP2 PE=1 SV=1;sp|Q13309-2|SKP2_HUMAN Isoform 2 of S-phase kina	4	3	3	3	0	0	1	0	0	0	0	0	2	2	0	0	0	0	1	0	0	0	0	0	2	2	0	0	0	0	1	0	0	0	0	0	2	2	0	0	8.5
204	Q9UJU2;Q5JRY5;Q9NQB0-7;H0YAR8;E2GH26;A0A0D9SGH8;C6ZRK5;C6ZRJ6;B7WNT5;C6ZRJ7;Q5VVR7;A0A0A0MTL7;A0A1B0GUV5;Q5JRY3;Q9NQB0;H0YEE5;H0YBC8;P36402-8;P36402-3;Q9NQB0-4;Q9NQB0-6;Q9NQB0-11;Q9NQB0-2;P36402-11;Q9NQB0-13;Q9NQB0-16;Q9NQB0-8;P36402-13;Q9NQB0-15;Q9NQB0-14;P36402;Q9UJU2-6;Q9NQB0-10;P36402-10;P36402-6;P36402-5;Q9NQB0-17;Q9NQB0-9;Q9NQB0-12;P36402-12;P36402-2;Q9UJU2-3;Q9UJU2-7;H0YBP2;P36402-9;Q9NQB0…	Q9UJU2;Q5JRY5;Q9NQB0-7;H0YAR8;E2GH26;A0A0D9SGH8;C6ZRK5;C6ZRJ6;B7WNT5;C6ZRJ7;Q5VVR7;A0A0A0MTL7;A0A1B0GUV5;Q5JRY3;Q9NQB0;H0YEE5;H0YBC8;P36402-8;P36402-3;Q9NQB0-4;Q9NQB0-6;Q9NQB0-11;Q9NQB0-2;P36402-11;Q9NQB0-13;Q9NQB0-16;Q9NQB0-8;P36402-13;Q9NQB0-15;Q9NQB0-14;P36402;Q9UJU2-6;Q9NQB0-10;P36402-10;P36402-6;P36402-5;Q9NQB0-17;Q9NQB0-9;Q9NQB0-12;P36402-12;P36402-2;Q9UJU2-3;Q9UJU2-7;H0YBP2;P36402-9;Q9NQB0…	2;2;2;2;2;2;2;2;2;2;2;2;2;2;2;2;2;2;2;2;2;2;2;2;2;2;2;2;2;2;2;2;2;2;2;2;2;2;2;2;2;2;2;2;2;2;2;2;2;2;2;2;2;1	2;2;2;2;2;2;2;2;2;2;2;2;2;2;2;2;2;2;2;2;2;2;2;2;2;2;2;2;2;2;2;2;2;2;2;2;2;2;2;2;2;2;2;2;2;2;2;2;2;2;2;2;2;1	2;2;2;2;2;2;2;2;2;2;2;2;2;2;2;2;2;2;2;2;2;2;2;2;2;2;2;2;2;2;2;2;2;2;2;2;2;2;2;2;2;2;2;2;2;2;2;2;2;2;2;2;2;1	Lymphoid enhancer-binding factor 1;Transcription factor 7-like 2;Transcription factor 7;Transcription factor 7-like 1	LEF1;TCF7L2;TCF7;TCF7L1	sp|Q9UJU2|LEF1_HUMAN Lymphoid enhancer-binding factor 1 OS=Homo sapiens OX=9606 GN=LEF1 PE=1 SV=1;tr|Q5JRY5|Q5JRY5_HUMAN Transcription factor 7-like 2 (Fragment) OS=Homo sapiens OX=9606 GN=TCF7L2 PE=1 SV=8;sp|Q9NQB0-7|TF7L2_HUMAN Isoform 7 of Transcription	54	2	2	2	0	0	0	1	0	2	0	2	0	1	0	0	0	0	0	1	0	2	0	2	0	1	0	0	0	0	0	1	0	2	0	2	0	1	0	0	6
205	P56378;A0A0A0MTQ5;G3V556;P56378-2	P56378;A0A0A0MTQ5;G3V556;P56378-2	2;2;2;1	2;2;2;1	2;2;2;1	6.8 kDa mitochondrial proteolipid	MP68;C14orf2	sp|P56378|ATP68_HUMAN ATP synthase subunit ATP5MPL, mitochondrial OS=Homo sapiens OX=9606 GN=ATP5MPL PE=1 SV=1;tr|A0A0A0MTQ5|A0A0A0MTQ5_HUMAN ATP synthase subunit ATP5MPL, mitochondrial OS=Homo sapiens OX=9606 GN=ATP5MPL PE=1 SV=1;tr|G3V556|G3V556_HUMAN AT	4	2	2	2	0	0	1	0	1	0	0	0	0	0	0	0	0	0	1	0	1	0	0	0	0	0	0	0	0	0	1	0	1	0	0	0	0	0	0	0	32.8
206	Q86XR7-2;Q9Y3B3;A0A0A6YYA0;Q9Y3B3-2	Q86XR7-2;Q9Y3B3;A0A0A6YYA0;Q9Y3B3-2	2;2;2;2	2;2;2;2	2;2;2;2	Transmembrane emp24 domain-containing protein 7	TMED7;TMED7-TICAM2	sp|Q86XR7-2|TCAM2_HUMAN Isoform 2 of TIR domain-containing adapter molecule 2 OS=Homo sapiens OX=9606 GN=TICAM2;sp|Q9Y3B3|TMED7_HUMAN Transmembrane emp24 domain-containing protein 7 OS=Homo sapiens OX=9606 GN=TMED7 PE=1 SV=2;tr|A0A0A6YYA0|A0A0A6YYA0_HUMAN	4	2	2	2	0	0	2	0	0	0	0	0	1	0	0	0	0	0	2	0	0	0	0	0	1	0	0	0	0	0	2	0	0	0	0	0	1	0	0	0	5.7
207	O75676;A0A0A6YYC0;E9PJN1;O75676-2	O75676;A0A0A6YYC0;E9PJN1;O75676-2	9;9;9;9	9;9;9;9	8;8;8;8	Ribosomal protein S6 kinase alpha-4;Ribosomal protein S6 kinase	RPS6KA4	sp|O75676|KS6A4_HUMAN Ribosomal protein S6 kinase alpha-4 OS=Homo sapiens OX=9606 GN=RPS6KA4 PE=1 SV=1;tr|A0A0A6YYC0|A0A0A6YYC0_HUMAN Non-specific serine/threonine protein kinase (Fragment) OS=Homo sapiens OX=9606 GN=RPS6KA4 PE=1 SV=5;tr|E9PJN1|E9PJN1_HUMA	4	9	9	8	0	0	8	1	1	0	0	0	0	0	0	0	0	0	8	1	1	0	0	0	0	0	0	0	0	0	8	0	0	0	0	0	0	0	0	0	17.6
208	Q96JP5;A0A0A6YYC7;Q96JP5-2;H3BTR0	Q96JP5;A0A0A6YYC7;Q96JP5-2;H3BTR0	6;6;6;3	6;6;6;3	6;6;6;3	E3 ubiquitin-protein ligase ZFP91	ZFP91;ZFP91-CNTF	sp|Q96JP5|ZFP91_HUMAN E3 ubiquitin-protein ligase ZFP91 OS=Homo sapiens OX=9606 GN=ZFP91 PE=1 SV=1;tr|A0A0A6YYC7|A0A0A6YYC7_HUMAN HCG2042749, isoform CRA_d OS=Homo sapiens OX=9606 GN=ZFP91-CNTF PE=4 SV=1;sp|Q96JP5-2|ZFP91_HUMAN Isoform 2 of E3 ubiquitin-pr	4	6	6	6	0	5	2	3	0	5	0	3	0	3	0	3	0	5	2	3	0	5	0	3	0	3	0	3	0	5	2	3	0	5	0	3	0	3	0	3	14.9
209	Q9Y6Q2;A0A0A6YYG5;Q53S48;Q9Y6Q2-3;Q9Y6Q2-2	Q9Y6Q2;A0A0A6YYG5;Q53S48;Q9Y6Q2-3;Q9Y6Q2-2	1;1;1;1;1	1;1;1;1;1	1;1;1;1;1	Stonin-1	STON1;STON1-GTF2A1L;ALF	sp|Q9Y6Q2|STON1_HUMAN Stonin-1 OS=Homo sapiens OX=9606 GN=STON1 PE=1 SV=2;tr|A0A0A6YYG5|A0A0A6YYG5_HUMAN Protein STON1-GTF2A1L OS=Homo sapiens OX=9606 GN=STON1-GTF2A1L PE=3 SV=1;tr|Q53S48|Q53S48_HUMAN STON1-GTF2A1L readthrough OS=Homo sapiens OX=9606 GN=ST	5	1	1	1	0	0	0	0	0	0	0	0	0	0	1	0	0	0	0	0	0	0	0	0	0	0	1	0	0	0	0	0	0	0	0	0	0	0	1	0	3.9
210	Q6IBW4;A0A0A6YYG7;Q6IBW4-2;Q6IBW4-4;Q6IBW4-5;E5RJL4;F8WAR3;H0YC55;E5RJN3	Q6IBW4;A0A0A6YYG7;Q6IBW4-2;Q6IBW4-4	3;3;3;3;1;1;1;1;1	3;3;3;3;1;1;1;1;1	3;3;3;3;1;1;1;1;1	Condensin-2 complex subunit H2	NCAPH2	sp|Q6IBW4|CNDH2_HUMAN Condensin-2 complex subunit H2 OS=Homo sapiens OX=9606 GN=NCAPH2 PE=1 SV=1;tr|A0A0A6YYG7|A0A0A6YYG7_HUMAN Condensin-2 complex subunit H2 OS=Homo sapiens OX=9606 GN=NCAPH2 PE=1 SV=1;sp|Q6IBW4-2|CNDH2_HUMAN Isoform 2 of Condensin-2 comp	9	3	3	3	0	0	2	1	0	2	0	1	0	2	0	0	0	0	2	1	0	2	0	1	0	2	0	0	0	0	2	1	0	2	0	1	0	2	0	0	8.6
211	Q9NQ55;A0A0A6YYI3;A0A0B4J1V8;Q9NQ55-2;Q9NQ55-3;A8MV53;C9J3W3;H7C446;C9JHF7	Q9NQ55;A0A0A6YYI3;A0A0B4J1V8;Q9NQ55-2;Q9NQ55-3;A8MV53;C9J3W3	14;14;14;14;14;13;7;5;3	14;14;14;14;14;13;7;5;3	14;14;14;14;14;13;7;5;3	Suppressor of SWI4 1 homolog	PPAN;PPAN-P2RY11	sp|Q9NQ55|SSF1_HUMAN Suppressor of SWI4 1 homolog OS=Homo sapiens OX=9606 GN=PPAN PE=2 SV=1;tr|A0A0A6YYI3|A0A0A6YYI3_HUMAN Protein PPAN-P2RY11 OS=Homo sapiens OX=9606 GN=PPAN-P2RY11 PE=4 SV=1;tr|A0A0B4J1V8|A0A0B4J1V8_HUMAN HCG2039996 OS=Homo sapiens OX=960	9	14	14	14	2	7	9	8	0	6	0	4	3	6	0	4	2	7	9	8	0	6	0	4	3	6	0	4	2	7	9	8	0	6	0	4	3	6	0	4	48.6
212	P0DMM9;P0DMN0;A0A0A6YYL2;P0DMM9-3;P0DMM9-2;H3BNY7;H3BPL6	P0DMM9;P0DMN0;A0A0A6YYL2;P0DMM9-3;P0DMM9-2	5;5;5;5;3;2;1	3;3;3;3;2;1;1	3;3;3;3;2;1;1	Sulfotransferase 1A3;Sulfotransferase 1A4;Sulfotransferase	SULT1A3;SULT1A4	sp|P0DMM9|ST1A3_HUMAN Sulfotransferase 1A3 OS=Homo sapiens OX=9606 GN=SULT1A3 PE=1 SV=1;sp|P0DMN0|ST1A4_HUMAN Sulfotransferase 1A4 OS=Homo sapiens OX=9606 GN=SULT1A4 PE=1 SV=1;tr|A0A0A6YYL2|A0A0A6YYL2_HUMAN Sulfotransferase OS=Homo sapiens OX=9606 GN=SULT1	7	5	3	3	0	0	4	0	0	0	0	0	1	0	0	0	0	0	3	0	0	0	0	0	0	0	0	0	0	0	3	0	0	0	0	0	0	0	0	0	33.2
213	A0A0A6YYL4;P57737-3;P57737;P57737-2;P57737-4;Q9Y3D7;I3L1U7;I3L0X9;I3L3T0;I3L212;E7EP81;I3L167	A0A0A6YYL4;P57737-3;P57737;P57737-2;P57737-4	5;5;3;3;3;2;2;2;2;1;1;1	5;5;3;3;3;2;2;2;2;1;1;1	5;5;3;3;3;2;2;2;2;1;1;1	Coronin;Coronin-7	CORO7-PAM16;CORO7	tr|A0A0A6YYL4|A0A0A6YYL4_HUMAN Coronin OS=Homo sapiens OX=9606 GN=CORO7-PAM16 PE=1 SV=1;sp|P57737-3|CORO7_HUMAN Isoform 3 of Coronin-7 OS=Homo sapiens OX=9606 GN=CORO7;sp|P57737|CORO7_HUMAN Coronin-7 OS=Homo sapiens OX=9606 GN=CORO7 PE=1 SV=2;sp|P57737-2|C	12	5	5	5	0	0	1	0	1	0	1	0	2	0	3	0	0	0	1	0	1	0	1	0	2	0	3	0	0	0	1	0	1	0	1	0	2	0	3	0	9
214	P32754;A0A0B4J1R4;P32754-2	P32754;A0A0B4J1R4;P32754-2	5;5;5	5;5;5	5;5;5	4-hydroxyphenylpyruvate dioxygenase	HPD	sp|P32754|HPPD_HUMAN 4-hydroxyphenylpyruvate dioxygenase OS=Homo sapiens OX=9606 GN=HPD PE=1 SV=2;tr|A0A0B4J1R4|A0A0B4J1R4_HUMAN 4-hydroxyphenylpyruvate dioxygenase OS=Homo sapiens OX=9606 GN=HPD PE=1 SV=1;sp|P32754-2|HPPD_HUMAN Isoform 2 of 4-hydroxypheny	3	5	5	5	3	0	2	0	1	0	0	0	0	0	0	0	3	0	2	0	1	0	0	0	0	0	0	0	3	0	2	0	1	0	0	0	0	0	0	0	19.3
215	A0A0B4J1U7	A0A0B4J1U7	1	1	1		IGHV6-1	sp|A0A0B4J1U7|HV601_HUMAN Immunoglobulin heavy variable 6-1 OS=Homo sapiens OX=9606 GN=IGHV6-1 PE=3 SV=1	1	1	1	1	1	1	0	0	0	0	1	1	0	0	0	0	1	1	0	0	0	0	1	1	0	0	0	0	1	1	0	0	0	0	1	1	0	0	0	0	5.8
216	A0A0B4J1V0;A0A0B4J1V6	A0A0B4J1V0;A0A0B4J1V6	3;2	2;1	1;0		IGHV3-15;IGHV3-73	sp|A0A0B4J1V0|HV315_HUMAN Immunoglobulin heavy variable 3-15 OS=Homo sapiens OX=9606 GN=IGHV3-15 PE=3 SV=1;sp|A0A0B4J1V6|HV373_HUMAN Immunoglobulin heavy variable 3-73 OS=Homo sapiens OX=9606 GN=IGHV3-73 PE=3 SV=1	2	3	2	1	1	1	0	0	0	0	2	1	0	1	0	1	1	1	0	0	0	0	2	1	0	0	0	0	1	1	0	0	0	0	1	1	0	0	0	0	21
217	Q9NRZ9;A0A0B4J1V9;Q9NRZ9-3;Q9NRZ9-2;A0A087WSW7;F6XU50;Q9NRZ9-6;Q9NRZ9-5;Q9NRZ9-4;Q9NW36;Q9NRZ9-8;Q9NRZ9-7;B1ALG6	Q9NRZ9;A0A0B4J1V9;Q9NRZ9-3;Q9NRZ9-2;A0A087WSW7;F6XU50;Q9NRZ9-6;Q9NRZ9-5;Q9NRZ9-4	18;18;18;18;17;17;17;17;17;6;4;4;2	18;18;18;18;17;17;17;17;17;6;4;4;2	18;18;18;18;17;17;17;17;17;6;4;4;2	Lymphoid-specific helicase	HELLS	sp|Q9NRZ9|HELLS_HUMAN Lymphoid-specific helicase OS=Homo sapiens OX=9606 GN=HELLS PE=1 SV=1;tr|A0A0B4J1V9|A0A0B4J1V9_HUMAN Helicase, lymphoid-specific, isoform CRA_b OS=Homo sapiens OX=9606 GN=HELLS PE=1 SV=1;sp|Q9NRZ9-3|HELLS_HUMAN Isoform 3 of Lymphoid-s	13	18	18	18	0	2	6	9	0	3	0	0	1	16	0	0	0	2	6	9	0	3	0	0	1	16	0	0	0	2	6	9	0	3	0	0	1	16	0	0	24.9
218	O75448;F5GY88;A0A0B4J1W0;O75448-2;B4DDR8;F5H5K2;B9TX62;H0YEG1;E9PFL1	O75448;F5GY88;A0A0B4J1W0;O75448-2;B4DDR8;F5H5K2	5;5;5;5;3;3;2;1;1	5;5;5;5;3;3;2;1;1	5;5;5;5;3;3;2;1;1	Mediator of RNA polymerase II transcription subunit 24	MED24	sp|O75448|MED24_HUMAN Mediator of RNA polymerase II transcription subunit 24 OS=Homo sapiens OX=9606 GN=MED24 PE=1 SV=1;tr|F5GY88|F5GY88_HUMAN Mediator complex subunit 24 OS=Homo sapiens OX=9606 GN=MED24 PE=1 SV=2;tr|A0A0B4J1W0|A0A0B4J1W0_HUMAN Mediator co	9	5	5	5	0	1	0	1	0	0	0	0	0	5	0	0	0	1	0	1	0	0	0	0	0	5	0	0	0	1	0	1	0	0	0	0	0	5	0	0	8
219	A0A0C4DH42;P0DP02;A0A0B4J1X5;P01767;P01772	A0A0C4DH42;P0DP02;A0A0B4J1X5;P01767;P01772	3;3;3;3;3	1;1;1;1;1	0;0;0;0;0	Ig heavy chain V-III region BUT;Ig heavy chain V-III region KOL	IGHV3-66;IGHV3-74	sp|A0A0C4DH42|HV366_HUMAN Immunoglobulin heavy variable 3-66 OS=Homo sapiens OX=9606 GN=IGHV3-66 PE=3 SV=1;sp|P0DP02|HVC33_HUMAN Immunoglobulin heavy variable 3-30-3 OS=Homo sapiens OX=9606 GN=IGHV3-30-3 PE=3 SV=1;sp|A0A0B4J1X5|HV374_HUMAN Immunoglobulin h	5	3	1	0	2	2	0	0	0	0	2	2	0	1	0	1	1	1	0	0	0	0	1	1	0	0	0	0	0	0	0	0	0	0	0	0	0	0	0	0	25
220	Q16629;A0A0B4J1Z1;C9JAB2;Q16629-3;Q16629-2;Q16629-4;F8WEA1	Q16629;A0A0B4J1Z1;C9JAB2;Q16629-3;Q16629-2;Q16629-4	10;10;10;10;10;10;3	10;10;10;10;10;10;3	9;9;9;9;9;9;3	Serine/arginine-rich splicing factor 7	SRSF7	sp|Q16629|SRSF7_HUMAN Serine/arginine-rich splicing factor 7 OS=Homo sapiens OX=9606 GN=SRSF7 PE=1 SV=1;tr|A0A0B4J1Z1|A0A0B4J1Z1_HUMAN Serine/arginine-rich-splicing factor 7 OS=Homo sapiens OX=9606 GN=SRSF7 PE=1 SV=1;tr|C9JAB2|C9JAB2_HUMAN Serine/arginine-	7	10	10	9	2	8	4	9	2	8	2	8	3	10	1	7	2	8	4	9	2	8	2	8	3	10	1	7	1	7	3	8	1	7	2	7	2	9	1	6	34.5
221	P60891;P21108;B1ALA9;A0A0B4J207;P11908;A0A2R8Y7H4;P60891-2;P11908-2;B7ZB02;B1ALA7;H7C540;Q15244;A6NMS2;D3YTJ7	P60891;P21108;B1ALA9;A0A0B4J207;P11908;A0A2R8Y7H4;P60891-2;P11908-2;B7ZB02;B1ALA7;H7C540	4;4;4;4;3;3;3;3;2;2;2;1;1;1	4;4;4;4;3;3;3;3;2;2;2;1;1;1	4;4;4;4;3;3;3;3;2;2;2;1;1;1	Ribose-phosphate pyrophosphokinase 1;Ribose-phosphate pyrophosphokinase 3;Ribose-phosphate pyrophosphokinase 2	PRPS1;PRPS1L1;PRPS2	sp|P60891|PRPS1_HUMAN Ribose-phosphate pyrophosphokinase 1 OS=Homo sapiens OX=9606 GN=PRPS1 PE=1 SV=2;sp|P21108|PRPS3_HUMAN Ribose-phosphate pyrophosphokinase 3 OS=Homo sapiens OX=9606 GN=PRPS1L1 PE=1 SV=2;tr|B1ALA9|B1ALA9_HUMAN Ribose-phosphate pyrophosph	14	4	4	4	1	0	3	0	2	0	0	0	1	0	1	0	1	0	3	0	2	0	0	0	1	0	1	0	1	0	3	0	2	0	0	0	1	0	1	0	18.2
222	B9A064;A0A0B4J231;P0DOY3;P0DOY2;A0A5H1ZRQ7;A0A5H1ZRQ4;P0CG04;P0CF74;A0M8Q6	B9A064;A0A0B4J231;P0DOY3;P0DOY2;A0A5H1ZRQ7;A0A5H1ZRQ4;P0CG04;P0CF74;A0M8Q6	2;2;1;1;1;1;1;1;1	2;2;1;1;1;1;1;1;1	2;2;1;1;1;1;1;1;1	Immunoglobulin lambda-like polypeptide 5;Ig lambda-1 chain C regions;Ig lambda-6 chain C region;Ig lambda-7 chain C region	IGLL5;IGLC1;IGLC6;IGLC7	sp|B9A064|IGLL5_HUMAN Immunoglobulin lambda-like polypeptide 5 OS=Homo sapiens OX=9606 GN=IGLL5 PE=2 SV=2;tr|A0A0B4J231|A0A0B4J231_HUMAN Immunoglobulin lambda-like polypeptide 5 OS=Homo sapiens OX=9606 GN=IGLL5 PE=1 SV=1;sp|P0DOY3|IGLC3_HUMAN Immunoglobuli	9	2	2	2	2	1	0	1	1	1	1	0	0	1	1	1	2	1	0	1	1	1	1	0	0	1	1	1	2	1	0	1	1	1	1	0	0	1	1	1	10.7
223	P61626;F8VV32;A0A0B4J259	P61626;F8VV32;A0A0B4J259	3;3;3	3;3;3	3;3;3	Lysozyme C;Lysozyme	LYZ	sp|P61626|LYSC_HUMAN Lysozyme C OS=Homo sapiens OX=9606 GN=LYZ PE=1 SV=1;tr|F8VV32|F8VV32_HUMAN 1,4-beta-N-acetylmuramidase C OS=Homo sapiens OX=9606 GN=LYZ PE=1 SV=1;tr|A0A0B4J259|A0A0B4J259_HUMAN 1,4-beta-N-acetylmuramidase C OS=Homo sapiens OX=9606 GN=L	3	3	3	3	3	1	0	0	1	0	0	0	0	0	0	0	3	1	0	0	1	0	0	0	0	0	0	0	3	1	0	0	1	0	0	0	0	0	0	0	18.2
224	Q9H0A8;A0A0B4J287;H3BM91	Q9H0A8;A0A0B4J287;H3BM91	1;1;1	1;1;1	1;1;1	COMM domain-containing protein 4	COMMD4	sp|Q9H0A8|COMD4_HUMAN COMM domain-containing protein 4 OS=Homo sapiens OX=9606 GN=COMMD4 PE=1 SV=1;tr|A0A0B4J287|A0A0B4J287_HUMAN COMM domain-containing protein 4 OS=Homo sapiens OX=9606 GN=COMMD4 PE=1 SV=1;tr|H3BM91|H3BM91_HUMAN COMM domain-containing pro	3	1	1	1	0	0	1	0	0	0	0	0	1	0	0	0	0	0	1	0	0	0	0	0	1	0	0	0	0	0	1	0	0	0	0	0	1	0	0	0	10.6
225	A0A0B4J2B4;K7EM56;S4R417;S4R456	A0A0B4J2B4;K7EM56;S4R417;S4R456	6;5;5;4	1;0;0;0	1;0;0;0		RPS15	tr|A0A0B4J2B4|A0A0B4J2B4_HUMAN 40S ribosomal protein S15 OS=Homo sapiens OX=9606 GN=RPS15 PE=1 SV=1;tr|K7EM56|K7EM56_HUMAN 40S ribosomal protein S15 OS=Homo sapiens OX=9606 GN=RPS15 PE=1 SV=2;tr|S4R417|S4R417_HUMAN 40S ribosomal protein S15 OS=Homo sapiens	4	6	1	1	1	1	5	0	0	0	0	1	3	1	0	1	0	0	0	0	0	0	0	0	1	0	0	0	0	0	0	0	0	0	0	0	1	0	0	0	67.8
226	A0A0B4J2B5;S4R460	A0A0B4J2B5;S4R460	4;3	3;2	0;0		IGHV3OR16-9	tr|A0A0B4J2B5|A0A0B4J2B5_HUMAN Immunoglobulin heavy variable 3/OR16-9 (non-functional) (Fragment) OS=Homo sapiens OX=9606 GN=IGHV3OR16-9 PE=1 SV=1;tr|S4R460|S4R460_HUMAN Immunoglobulin heavy variable 3/OR16-9 (non-functional) OS=Homo sapiens OX=9606 GN=IGH	2	4	3	0	2	2	0	0	0	0	1	1	0	1	0	1	2	2	0	0	0	0	1	1	0	0	0	0	0	0	0	0	0	0	0	0	0	0	0	0	49
227	Q15269;A0A0B4J2E5;C9J544;A0A096LPI6;A0A0J9YX21	Q15269;A0A0B4J2E5	16;16;3;3;1	16;16;3;3;1	16;16;3;3;1	Periodic tryptophan protein 2 homolog	PWP2	sp|Q15269|PWP2_HUMAN Periodic tryptophan protein 2 homolog OS=Homo sapiens OX=9606 GN=PWP2 PE=2 SV=2;tr|A0A0B4J2E5|A0A0B4J2E5_HUMAN Uncharacterized protein OS=Homo sapiens OX=9606 GN=LOC102724159 PE=1 SV=1	5	16	16	16	1	9	1	13	1	12	0	0	0	10	0	0	1	9	1	13	1	12	0	0	0	10	0	0	1	9	1	13	1	12	0	0	0	10	0	0	22
228	P52435;Q9GZM3;Q9H1A7;A0A0B4J2F8;F8WF84;F6S314;E2QRJ6;A6NFM0	P52435;Q9GZM3;Q9H1A7;A0A0B4J2F8;F8WF84;F6S314;E2QRJ6;A6NFM0	1;1;1;1;1;1;1;1	1;1;1;1;1;1;1;1	1;1;1;1;1;1;1;1	DNA-directed RNA polymerase II subunit RPB11-a;DNA-directed RNA polymerase II subunit RPB11-b1;DNA-directed RNA polymerase II subunit RPB11-b2	POLR2J;POLR2J2;POLR2J3	sp|P52435|RPB11_HUMAN DNA-directed RNA polymerase II subunit RPB11-a OS=Homo sapiens OX=9606 GN=POLR2J PE=1 SV=1;sp|Q9GZM3|RPB1B_HUMAN DNA-directed RNA polymerase II subunit RPB11-b1 OS=Homo sapiens OX=9606 GN=POLR2J2 PE=1 SV=2;sp|Q9H1A7|RPB1C_HUMAN DNA-di	8	1	1	1	0	1	0	0	0	1	0	0	0	0	0	0	0	1	0	0	0	1	0	0	0	0	0	0	0	1	0	0	0	1	0	0	0	0	0	0	25.6
229	P01743;P01742;P0DP01;A0A0C4DH29;A0A0B4J2H0	P01743;P01742;P0DP01;A0A0C4DH29;A0A0B4J2H0	1;1;1;1;1	1;1;1;1;1	1;1;1;1;1	Ig heavy chain V-I region HG3;Ig heavy chain V-I region EU	IGHV1-3;IGHV1-69-2	sp|P01743|HV146_HUMAN Immunoglobulin heavy variable 1-46 OS=Homo sapiens OX=9606 GN=IGHV1-46 PE=1 SV=2;sp|P01742|HV169_HUMAN Immunoglobulin heavy variable 1-69 OS=Homo sapiens OX=9606 GN=IGHV1-69 PE=1 SV=2;sp|P0DP01|HV108_HUMAN Immunoglobulin heavy variabl	5	1	1	1	0	0	0	0	0	0	1	1	0	0	0	0	0	0	0	0	0	0	1	1	0	0	0	0	0	0	0	0	0	0	1	1	0	0	0	0	9.4
230	Q03112;Q9HAZ2;Q03112-3;Q03112-6;Q9HAZ2-4;Q03112-4;E7EUL6;A0A0C3SFZ7;H0YA13;D6RFY3;D6RDW0;Q03112-5;Q03112-1;Q9HAZ2-2;Q9HAZ2-3	Q03112;Q9HAZ2;Q03112-3;Q03112-6;Q9HAZ2-4;Q03112-4;E7EUL6;A0A0C3SFZ7;H0YA13;D6RFY3;D6RDW0;Q03112-5;Q03112-1;Q9HAZ2-2;Q9HAZ2-3	1;1;1;1;1;1;1;1;1;1;1;1;1;1;1	1;1;1;1;1;1;1;1;1;1;1;1;1;1;1	1;1;1;1;1;1;1;1;1;1;1;1;1;1;1	MDS1 and EVI1 complex locus protein EVI1;PR domain zinc finger protein 16	MECOM;PRDM16	sp|Q03112|MECOM_HUMAN Histone-lysine N-methyltransferase MECOM OS=Homo sapiens OX=9606 GN=MECOM PE=1 SV=3;sp|Q9HAZ2|PRD16_HUMAN Histone-lysine N-methyltransferase PRDM16 OS=Homo sapiens OX=9606 GN=PRDM16 PE=1 SV=3;sp|Q03112-3|MECOM_HUMAN Isoform 2 of Histo	15	1	1	1	0	0	0	0	0	0	0	0	0	0	0	1	0	0	0	0	0	0	0	0	0	0	0	1	0	0	0	0	0	0	0	0	0	0	0	1	0.8
231	A0A0C4DFL7;Q16850;Q16850-2;H7C0D0;C9IYR8;A0A3B3ITR4	A0A0C4DFL7;Q16850;Q16850-2	7;6;4;2;1;1	7;6;4;2;1;1	7;6;4;2;1;1	Lanosterol 14-alpha demethylase	CYP51A1	tr|A0A0C4DFL7|A0A0C4DFL7_HUMAN Lanosterol 14-alpha demethylase OS=Homo sapiens OX=9606 GN=CYP51A1 PE=1 SV=1;sp|Q16850|CP51A_HUMAN Lanosterol 14-alpha demethylase OS=Homo sapiens OX=9606 GN=CYP51A1 PE=1 SV=3;sp|Q16850-2|CP51A_HUMAN Isoform 2 of Lanosterol 1	6	7	7	7	0	0	7	0	0	0	0	0	1	0	0	0	0	0	7	0	0	0	0	0	1	0	0	0	0	0	7	0	0	0	0	0	1	0	0	0	27.7
232	O94953;A0A0C4DFL8;F5GX28;K7EQ54;O94953-2;O75164;K7ES23	O94953;A0A0C4DFL8;F5GX28;K7EQ54	5;5;5;3;2;1;1	5;5;5;3;2;1;1	5;5;5;3;2;1;1	Lysine-specific demethylase 4B	KDM4B	sp|O94953|KDM4B_HUMAN Lysine-specific demethylase 4B OS=Homo sapiens OX=9606 GN=KDM4B PE=1 SV=4;tr|A0A0C4DFL8|A0A0C4DFL8_HUMAN [Histone H3]-trimethyl-L-lysine(9) demethylase OS=Homo sapiens OX=9606 GN=KDM4B PE=1 SV=1;tr|F5GX28|F5GX28_HUMAN [Histone H3]-tri	7	5	5	5	0	0	0	0	0	0	0	0	0	4	0	1	0	0	0	0	0	0	0	0	0	4	0	1	0	0	0	0	0	0	0	0	0	4	0	1	6.8
233	Q92544;A0A0C4DFM1;F8WCN2;F2Z2L1	Q92544;A0A0C4DFM1	9;9;1;1	9;9;1;1	9;9;1;1	Transmembrane 9 superfamily member 4	TM9SF4	sp|Q92544|TM9S4_HUMAN Transmembrane 9 superfamily member 4 OS=Homo sapiens OX=9606 GN=TM9SF4 PE=1 SV=2;tr|A0A0C4DFM1|A0A0C4DFM1_HUMAN Transmembrane 9 superfamily member OS=Homo sapiens OX=9606 GN=TM9SF4 PE=1 SV=1	4	9	9	9	0	0	9	0	0	0	0	0	3	0	0	0	0	0	9	0	0	0	0	0	3	0	0	0	0	0	9	0	0	0	0	0	3	0	0	0	18.8
234	Q5TAX3;A0A0C4DFM7;E9PKY2;E9PKX1;H0YDJ1;H0YEE8;Q5TAX3-2;E9PQS7;X6R5G7;E9PRG2	Q5TAX3;A0A0C4DFM7;E9PKY2;E9PKX1	16;16;11;8;6;6;4;1;1;1	15;15;10;7;6;6;4;1;1;1	15;15;10;7;6;6;4;1;1;1	Terminal uridylyltransferase 4	ZCCHC11	sp|Q5TAX3|TUT4_HUMAN Terminal uridylyltransferase 4 OS=Homo sapiens OX=9606 GN=TUT4 PE=1 SV=3;tr|A0A0C4DFM7|A0A0C4DFM7_HUMAN Terminal uridylyltransferase 4 OS=Homo sapiens OX=9606 GN=TUT4 PE=1 SV=1;tr|E9PKY2|E9PKY2_HUMAN Terminal uridylyltransferase 4 (Fra	10	16	15	15	5	0	4	0	1	0	12	1	6	0	1	1	4	0	4	0	1	0	11	0	6	0	1	0	4	0	4	0	1	0	11	0	6	0	1	0	13.6
235	A0A0C4DFN0;Q6NSZ9-2;Q6NSZ9-4;C9K079	A0A0C4DFN0;Q6NSZ9-2	12;11;5;2	1;0;0;0	1;0;0;0	Zinc finger and SCAN domain-containing protein 25	ZSCAN25	tr|A0A0C4DFN0|A0A0C4DFN0_HUMAN Zinc finger and SCAN domain-containing protein 25 OS=Homo sapiens OX=9606 GN=ZSCAN25 PE=1 SV=1;sp|Q6NSZ9-2|ZSC25_HUMAN Isoform 2 of Zinc finger and SCAN domain-containing protein 25 OS=Homo sapiens OX=9606 GN=ZSCAN25	4	12	1	1	0	7	0	0	0	6	0	9	0	0	0	9	0	1	0	0	0	1	0	1	0	0	0	1	0	1	0	0	0	1	0	1	0	0	0	1	45.2
236	Q8NCN2;A0A0C4DFQ2	Q8NCN2;A0A0C4DFQ2	8;8	8;8	8;8	Zinc finger and BTB domain-containing protein 34	ZBTB34	sp|Q8NCN2|ZBT34_HUMAN Zinc finger and BTB domain-containing protein 34 OS=Homo sapiens OX=9606 GN=ZBTB34 PE=1 SV=4;tr|A0A0C4DFQ2|A0A0C4DFQ2_HUMAN Zinc finger and BTB domain-containing protein 34 OS=Homo sapiens OX=9606 GN=ZBTB34 PE=1 SV=1	2	8	8	8	0	3	0	0	0	1	0	5	0	1	0	5	0	3	0	0	0	1	0	5	0	1	0	5	0	3	0	0	0	1	0	5	0	1	0	5	22.6
237	Q7Z7L9;F8W6Y9;A0A0C4DFQ3	Q7Z7L9;F8W6Y9;A0A0C4DFQ3	3;3;3	3;3;3	3;3;3	Zinc finger and SCAN domain-containing protein 2	ZSCAN2	sp|Q7Z7L9|ZSCA2_HUMAN Zinc finger and SCAN domain-containing protein 2 OS=Homo sapiens OX=9606 GN=ZSCAN2 PE=2 SV=2;tr|F8W6Y9|F8W6Y9_HUMAN Zinc finger and SCAN domain-containing protein 2 OS=Homo sapiens OX=9606 GN=ZSCAN2 PE=1 SV=1;tr|A0A0C4DFQ3|A0A0C4DFQ3_	3	3	3	3	0	1	0	0	0	1	0	3	0	2	0	2	0	1	0	0	0	1	0	3	0	2	0	2	0	1	0	0	0	1	0	3	0	2	0	2	7
238	A0A590UJD9;A0A0C4DFT3;Q12959-4;A0A590UJ08;Q12959-2;Q12959;A0A590UK81;A0A590UKA8;A0A590UJC5;A0A590UJR5;A0A590UJ81;A0A590UJ18;A0A590UJL2;A0A590UJS9;A0A590UJ68;A0A590UK48;A0A590UJ25;A0A590UK02;E7EQD7;A0A590UJ29;A0A590UJ64;A0A590UJR4;Q12959-8;Q12959-3;Q12959-6;Q12959-7;A0A590UJX2;Q12959-5;Q12959-9;A0A590UK70	A0A590UJD9;A0A0C4DFT3;Q12959-4;A0A590UJ08;Q12959-2;Q12959;A0A590UK81;A0A590UKA8;A0A590UJC5;A0A590UJR5;A0A590UJ81;A0A590UJ18;A0A590UJL2;A0A590UJS9;A0A590UJ68;A0A590UK48;A0A590UJ25;A0A590UK02;E7EQD7;A0A590UJ29;A0A590UJ64;A0A590UJR4;Q12959-8;Q12959-3;Q12959-6;Q12959-7;A0A590UJX2;Q12959-5;Q12959-9;A0A590UK70	2;2;2;2;2;1;1;1;1;1;1;1;1;1;1;1;1;1;1;1;1;1;1;1;1;1;1;1;1;1	2;2;2;2;2;1;1;1;1;1;1;1;1;1;1;1;1;1;1;1;1;1;1;1;1;1;1;1;1;1	2;2;2;2;2;1;1;1;1;1;1;1;1;1;1;1;1;1;1;1;1;1;1;1;1;1;1;1;1;1	Disks large homolog 1	DLG1	tr|A0A590UJD9|A0A590UJD9_HUMAN Disks large homolog 1 OS=Homo sapiens OX=9606 GN=DLG1 PE=1 SV=1;tr|A0A0C4DFT3|A0A0C4DFT3_HUMAN Disks large homolog 1 OS=Homo sapiens OX=9606 GN=DLG1 PE=1 SV=1;sp|Q12959-4|DLG1_HUMAN Isoform 4 of Disks large homolog 1 OS=Homo	30	2	2	2	0	1	1	0	0	0	0	0	0	0	0	0	0	1	1	0	0	0	0	0	0	0	0	0	0	1	1	0	0	0	0	0	0	0	0	0	4.1
239	Q9BXS9;Q9BXS9-3;G3XAC1;A0A0C4DFT5;Q9BXS9-5;Q9BXS9-7;Q9BXS9-4;Q9BXS9-2;H7BZ36;F8W9I8;C9J6Y3;C9JKR6;Q9BXS9-6	Q9BXS9;Q9BXS9-3;G3XAC1;A0A0C4DFT5;Q9BXS9-5;Q9BXS9-7;Q9BXS9-4;Q9BXS9-2	4;4;4;4;4;4;4;4;1;1;1;1;1	4;4;4;4;4;4;4;4;1;1;1;1;1	4;4;4;4;4;4;4;4;1;1;1;1;1	Solute carrier family 26 member 6	SLC26A6	sp|Q9BXS9|S26A6_HUMAN Solute carrier family 26 member 6 OS=Homo sapiens OX=9606 GN=SLC26A6 PE=1 SV=1;sp|Q9BXS9-3|S26A6_HUMAN Isoform 3 of Solute carrier family 26 member 6 OS=Homo sapiens OX=9606 GN=SLC26A6;tr|G3XAC1|G3XAC1_HUMAN Solute carrier family 26 m	13	4	4	4	0	0	3	0	0	0	0	0	0	1	0	1	0	0	3	0	0	0	0	0	0	1	0	1	0	0	3	0	0	0	0	0	0	1	0	1	11.1
240	Q9NQC1;D6R9B8;C9J929;B5MBX1;A0A0C4DFT8;G3XAA4;Q9NQC1-3;Q9NQC1-2	Q9NQC1;D6R9B8;C9J929;B5MBX1;A0A0C4DFT8;G3XAA4;Q9NQC1-3;Q9NQC1-2	1;1;1;1;1;1;1;1	1;1;1;1;1;1;1;1	1;1;1;1;1;1;1;1	Protein Jade-2	JADE2	sp|Q9NQC1|JADE2_HUMAN E3 ubiquitin-protein ligase Jade-2 OS=Homo sapiens OX=9606 GN=JADE2 PE=1 SV=2;tr|D6R9B8|D6R9B8_HUMAN E3 ubiquitin-protein ligase Jade-2 (Fragment) OS=Homo sapiens OX=9606 GN=JADE2 PE=1 SV=1;tr|C9J929|C9J929_HUMAN E3 ubiquitin-protein	8	1	1	1	0	0	1	0	0	0	0	0	0	0	0	0	0	0	1	0	0	0	0	0	0	0	0	0	0	0	1	0	0	0	0	0	0	0	0	0	2.8
241	Q5TBA9;A0A2R8YCY2;A0A0C4DFX2;A0A286YFA9;A0A2R8Y5V8	Q5TBA9;A0A2R8YCY2;A0A0C4DFX2;A0A286YFA9;A0A2R8Y5V8	6;6;6;6;6	3;3;3;3;3	3;3;3;3;3	Protein furry homolog	FRY	sp|Q5TBA9|FRY_HUMAN Protein furry homolog OS=Homo sapiens OX=9606 GN=FRY PE=1 SV=1;tr|A0A2R8YCY2|A0A2R8YCY2_HUMAN Protein furry homolog OS=Homo sapiens OX=9606 GN=FRY PE=1 SV=1;tr|A0A0C4DFX2|A0A0C4DFX2_HUMAN Protein furry homolog OS=Homo sapiens OX=9606 GN	5	6	3	3	0	0	3	0	0	0	1	0	4	0	0	0	0	0	1	0	0	0	1	0	1	0	0	0	0	0	1	0	0	0	1	0	1	0	0	0	1.9
242	Q9H3P2;A0A0C4DFX9;H0Y3X6;C9JHL4;Q9H3P2-7;H7C2C7;F8W954;F8WF98;H7C0W2;C9JEM7;H7C3C2;H7C2M8	Q9H3P2;A0A0C4DFX9;H0Y3X6;C9JHL4;Q9H3P2-7	8;8;6;4;4;3;2;2;2;2;1;1	8;8;6;4;4;3;2;2;2;2;1;1	8;8;6;4;4;3;2;2;2;2;1;1	Negative elongation factor A	NELFA	sp|Q9H3P2|NELFA_HUMAN Negative elongation factor A OS=Homo sapiens OX=9606 GN=NELFA PE=1 SV=3;tr|A0A0C4DFX9|A0A0C4DFX9_HUMAN Negative elongation factor A OS=Homo sapiens OX=9606 GN=NELFA PE=1 SV=1;tr|H0Y3X6|H0Y3X6_HUMAN Negative elongation factor A (Fragme	12	8	8	8	0	0	2	0	0	0	0	0	7	0	0	0	0	0	2	0	0	0	0	0	7	0	0	0	0	0	2	0	0	0	0	0	7	0	0	0	32.4
243	O75290;A0A0C4DG08;O75290-3;Q9Y6R6;A0A075B7B0;A0A075B791;A0A075B796;M0QXV4;C9JTJ1;O75290-2	O75290;A0A0C4DG08;O75290-3	3;3;3;1;1;1;1;1;1;1	3;3;3;1;1;1;1;1;1;1	3;3;3;1;1;1;1;1;1;1	Zinc finger protein 780A	ZNF780A	sp|O75290|Z780A_HUMAN Zinc finger protein 780A OS=Homo sapiens OX=9606 GN=ZNF780A PE=1 SV=3;tr|A0A0C4DG08|A0A0C4DG08_HUMAN Zinc finger protein 780A OS=Homo sapiens OX=9606 GN=ZNF780A PE=1 SV=1;sp|O75290-3|Z780A_HUMAN Isoform 3 of Zinc finger protein 780A O	10	3	3	3	0	1	0	0	0	3	0	1	0	0	0	0	0	1	0	0	0	3	0	1	0	0	0	0	0	1	0	0	0	3	0	1	0	0	0	0	5.3
244	P08865;C9J9K3;A0A0C4DG17;F8WD59	P08865;C9J9K3;A0A0C4DG17;F8WD59	16;16;16;8	16;16;16;8	16;16;16;8	40S ribosomal protein SA	RPSA	sp|P08865|RSSA_HUMAN 40S ribosomal protein SA OS=Homo sapiens OX=9606 GN=RPSA PE=1 SV=4;tr|C9J9K3|C9J9K3_HUMAN 40S ribosomal protein SA (Fragment) OS=Homo sapiens OX=9606 GN=RPSA PE=1 SV=8;tr|A0A0C4DG17|A0A0C4DG17_HUMAN 40S ribosomal protein SA OS=Homo sap	4	16	16	16	13	3	10	10	13	3	14	2	11	8	16	4	13	3	10	10	13	3	14	2	11	8	16	4	13	3	10	10	13	3	14	2	11	8	16	4	63.7
245	Q9NP71;C9JDF5;A0A0C4DG26;Q9NP71-5;Q9NP71-6;Q9NP71-4;Q9NP71-2;Q9NP71-3	Q9NP71;C9JDF5;A0A0C4DG26;Q9NP71-5;Q9NP71-6;Q9NP71-4;Q9NP71-2;Q9NP71-3	1;1;1;1;1;1;1;1	1;1;1;1;1;1;1;1	1;1;1;1;1;1;1;1	Carbohydrate-responsive element-binding protein	MLXIPL	sp|Q9NP71|MLXPL_HUMAN Carbohydrate-responsive element-binding protein OS=Homo sapiens OX=9606 GN=MLXIPL PE=1 SV=1;tr|C9JDF5|C9JDF5_HUMAN Carbohydrate-responsive element-binding protein (Fragment) OS=Homo sapiens OX=9606 GN=MLXIPL PE=1 SV=1;tr|A0A0C4DG26|A0	8	1	1	1	0	1	0	1	0	1	0	0	0	1	0	0	0	1	0	1	0	1	0	0	0	1	0	0	0	1	0	1	0	1	0	0	0	1	0	0	1.8
246	O43933;A0A0C4DG33;O43933-2	O43933;A0A0C4DG33;O43933-2	4;4;3	4;4;3	4;4;3	Peroxisome biogenesis factor 1	PEX1	sp|O43933|PEX1_HUMAN Peroxisome biogenesis factor 1 OS=Homo sapiens OX=9606 GN=PEX1 PE=1 SV=1;tr|A0A0C4DG33|A0A0C4DG33_HUMAN Peroxin-1 OS=Homo sapiens OX=9606 GN=PEX1 PE=1 SV=1;sp|O43933-2|PEX1_HUMAN Isoform 2 of Peroxisome biogenesis factor 1 OS=Homo sapi	3	4	4	4	0	0	0	0	0	0	0	0	1	0	4	0	0	0	0	0	0	0	0	0	1	0	4	0	0	0	0	0	0	0	0	0	1	0	4	0	3.2
247	E9PSD0;A0A0C4DG42	E9PSD0;A0A0C4DG42	1;1	1;1	1;1		ZNF34	tr|E9PSD0|E9PSD0_HUMAN Zinc finger protein 34 (Fragment) OS=Homo sapiens OX=9606 GN=ZNF34 PE=1 SV=1;tr|A0A0C4DG42|A0A0C4DG42_HUMAN Zinc finger protein 34 OS=Homo sapiens OX=9606 GN=ZNF34 PE=1 SV=1	2	1	1	1	0	1	0	0	0	1	0	0	0	0	0	1	0	1	0	0	0	1	0	0	0	0	0	1	0	1	0	0	0	1	0	0	0	0	0	1	9.1
248	Q66PJ3;Q66PJ3-2;Q66PJ3-7;Q66PJ3-3;F5GYV5;H7BZV4;A0A0C4DG62;F8WCT1;F5H7X4;Q66PJ3-4	Q66PJ3;Q66PJ3-2;Q66PJ3-7;Q66PJ3-3;F5GYV5;H7BZV4;A0A0C4DG62;F8WCT1;F5H7X4;Q66PJ3-4	1;1;1;1;1;1;1;1;1;1	1;1;1;1;1;1;1;1;1;1	1;1;1;1;1;1;1;1;1;1	ADP-ribosylation factor-like protein 6-interacting protein 4	ARL6IP4	sp|Q66PJ3|AR6P4_HUMAN ADP-ribosylation factor-like protein 6-interacting protein 4 OS=Homo sapiens OX=9606 GN=ARL6IP4 PE=1 SV=2;sp|Q66PJ3-2|AR6P4_HUMAN Isoform 2 of ADP-ribosylation factor-like protein 6-interacting protein 4 OS=Homo sapiens OX=9606 GN=ARL	10	1	1	1	0	0	1	0	0	0	1	0	0	0	0	0	0	0	1	0	0	0	1	0	0	0	0	0	0	0	1	0	0	0	1	0	0	0	0	0	3.8
249	A0A0C4DG89;D6RJA6	A0A0C4DG89	28;8	28;8	1;0		DDX46	tr|A0A0C4DG89|A0A0C4DG89_HUMAN RNA helicase OS=Homo sapiens OX=9606 GN=DDX46 PE=1 SV=1	2	28	28	1	1	5	21	4	1	2	8	0	17	0	2	0	1	5	21	4	1	2	8	0	17	0	2	0	0	0	1	0	0	0	1	0	1	0	0	0	32
250	Q14527;A0A0C4DGA6;Q14527-2;H7C5K0	Q14527;A0A0C4DGA6;Q14527-2;H7C5K0	20;20;19;10	20;20;19;10	20;20;19;10	Helicase-like transcription factor	HLTF	sp|Q14527|HLTF_HUMAN Helicase-like transcription factor OS=Homo sapiens OX=9606 GN=HLTF PE=1 SV=2;tr|A0A0C4DGA6|A0A0C4DGA6_HUMAN Helicase-like transcription factor OS=Homo sapiens OX=9606 GN=HLTF PE=1 SV=1;sp|Q14527-2|HLTF_HUMAN Isoform 2 of Helicase-like	4	20	20	20	6	9	10	7	0	11	0	0	0	2	0	1	6	9	10	7	0	11	0	0	0	2	0	1	6	9	10	7	0	11	0	0	0	2	0	1	27.7
251	Q7Z398;M0QWZ8;A0A0C4DGB4;Q7Z398-2	Q7Z398;M0QWZ8;A0A0C4DGB4;Q7Z398-2	1;1;1;1	1;1;1;1	1;1;1;1	Zinc finger protein 550	ZNF550	sp|Q7Z398|ZN550_HUMAN Zinc finger protein 550 OS=Homo sapiens OX=9606 GN=ZNF550 PE=1 SV=2;tr|M0QWZ8|M0QWZ8_HUMAN Zinc finger protein 550 (Fragment) OS=Homo sapiens OX=9606 GN=ZNF550 PE=1 SV=1;tr|A0A0C4DGB4|A0A0C4DGB4_HUMAN Zinc finger protein 550 OS=Homo s	4	1	1	1	0	0	1	0	0	0	0	0	0	0	0	0	0	0	1	0	0	0	0	0	0	0	0	0	0	0	1	0	0	0	0	0	0	0	0	0	4.3
252	Q9NZ71;A0A0C4DGC7;Q9NZ71-5;Q9NZ71-9;Q9NZ71-8;Q9NZ71-4;Q9NZ71-7;Q9NZ71-6;Q9NZ71-2	Q9NZ71;A0A0C4DGC7;Q9NZ71-5;Q9NZ71-9;Q9NZ71-8;Q9NZ71-4;Q9NZ71-7;Q9NZ71-6;Q9NZ71-2	2;2;2;2;2;2;2;2;2	2;2;2;2;2;2;2;2;2	2;2;2;2;2;2;2;2;2	Regulator of telomere elongation helicase 1	RTEL1	sp|Q9NZ71|RTEL1_HUMAN Regulator of telomere elongation helicase 1 OS=Homo sapiens OX=9606 GN=RTEL1 PE=1 SV=2;tr|A0A0C4DGC7|A0A0C4DGC7_HUMAN Regulator of telomere elongation helicase 1 (Fragment) OS=Homo sapiens OX=9606 GN=RTEL1 PE=1 SV=1;sp|Q9NZ71-5|RTEL1_	9	2	2	2	0	0	1	0	1	0	0	0	0	0	0	0	0	0	1	0	1	0	0	0	0	0	0	0	0	0	1	0	1	0	0	0	0	0	0	0	2.3
253	Q9UKS6;A0A0C4DGG1;E9PIY1;H0YDM6	Q9UKS6;A0A0C4DGG1;E9PIY1	3;3;2;1	3;3;2;1	3;3;2;1	Protein kinase C and casein kinase substrate in neurons protein 3	PACSIN3	sp|Q9UKS6|PACN3_HUMAN Protein kinase C and casein kinase substrate in neurons protein 3 OS=Homo sapiens OX=9606 GN=PACSIN3 PE=1 SV=2;tr|A0A0C4DGG1|A0A0C4DGG1_HUMAN Protein kinase C and casein kinase substrate in neurons protein 3 (Fragment) OS=Homo sapiens	4	3	3	3	0	0	0	1	0	0	0	0	3	1	0	0	0	0	0	1	0	0	0	0	3	1	0	0	0	0	0	1	0	0	0	0	3	1	0	0	9.9
254	Q8NHM5;A0A0C4DGG3;Q8NHM5-4;Q8NHM5-3;Q8NHM5-2	Q8NHM5;A0A0C4DGG3;Q8NHM5-4;Q8NHM5-3;Q8NHM5-2	5;5;5;5;4	3;3;3;3;2	3;3;3;3;2	Lysine-specific demethylase 2B	KDM2B	sp|Q8NHM5|KDM2B_HUMAN Lysine-specific demethylase 2B OS=Homo sapiens OX=9606 GN=KDM2B PE=1 SV=1;tr|A0A0C4DGG3|A0A0C4DGG3_HUMAN Lysine-specific demethylase 2B OS=Homo sapiens OX=9606 GN=KDM2B PE=1 SV=1;sp|Q8NHM5-4|KDM2B_HUMAN Isoform 4 of Lysine-specific de	5	5	3	3	0	3	0	2	0	3	0	1	0	1	0	1	0	2	0	2	0	2	0	1	0	0	0	1	0	2	0	2	0	2	0	1	0	0	0	1	3.8
255	Q14839;F5GWX5;A0A2R8YFK9;Q14839-2;A0A2U3TZM0;A0A2R8Y5J0;A0A2R8Y425;A0A2R8Y212;A0A2R8Y521;A0A0C4DGG9;A0A2R8YFD8;A0A2R8YDJ9;A0A2R8YD40;A0A2R8YDW2;A0A2R8Y4X2;A0A2R8Y8C1;A0A2R8Y445;A0A2R8YER1;A0A2R8Y5Z7;A0A2R8Y685;A0A2R8Y8B3;A0A2R8Y7I0;A0A2R8Y7M9;A0A2R8Y5M9;A0A2R8YE38;Q8TDI0;K7EMY3;A0A5F9ZHX5;F2Z2R5;F5H6N4;A0A2R8Y6G9;K7EPV1;K7ESA5;F6T542;A0A2R8Y7X1;A0A2R8Y795	Q14839;F5GWX5;A0A2R8YFK9;Q14839-2;A0A2U3TZM0;A0A2R8Y5J0;A0A2R8Y425;A0A2R8Y212;A0A2R8Y521;A0A0C4DGG9;A0A2R8YFD8;A0A2R8YDJ9;A0A2R8YD40;A0A2R8YDW2;A0A2R8Y4X2;A0A2R8Y8C1;A0A2R8Y445;A0A2R8YER1;A0A2R8Y5Z7;A0A2R8Y685	80;80;80;80;80;80;80;80;80;80;77;73;72;65;65;64;63;63;46;42;34;34;32;30;26;18;14;10;6;6;3;1;1;1;1;1	80;80;80;80;80;80;80;80;80;80;77;73;72;65;65;64;63;63;46;42;34;34;32;30;26;18;14;10;6;6;3;1;1;1;1;1	67;67;67;67;67;67;67;67;67;67;64;60;59;52;52;53;52;52;36;33;29;30;29;25;23;7;5;0;2;6;3;0;0;0;1;1	Chromodomain-helicase-DNA-binding protein 4	CHD4	sp|Q14839|CHD4_HUMAN Chromodomain-helicase-DNA-binding protein 4 OS=Homo sapiens OX=9606 GN=CHD4 PE=1 SV=2;tr|F5GWX5|F5GWX5_HUMAN DNA helicase OS=Homo sapiens OX=9606 GN=CHD4 PE=1 SV=1;tr|A0A2R8YFK9|A0A2R8YFK9_HUMAN DNA helicase OS=Homo sapiens OX=9606 GN=	36	80	80	67	0	51	2	63	0	59	0	27	0	62	0	32	0	51	2	63	0	59	0	27	0	62	0	32	0	42	1	51	0	50	0	20	0	53	0	27	51.2
256	Q9Y6R0;M0R0Q4;M0QZV7;M0QXQ4;M0QYC2;A0A0C4DGH3	Q9Y6R0;M0R0Q4;M0QZV7;M0QXQ4;M0QYC2;A0A0C4DGH3	1;1;1;1;1;1	1;1;1;1;1;1	1;1;1;1;1;1	Numb-like protein	NUMBL	sp|Q9Y6R0|NUMBL_HUMAN Numb-like protein OS=Homo sapiens OX=9606 GN=NUMBL PE=1 SV=1;tr|M0R0Q4|M0R0Q4_HUMAN Numb-like protein (Fragment) OS=Homo sapiens OX=9606 GN=NUMBL PE=1 SV=1;tr|M0QZV7|M0QZV7_HUMAN Numb-like protein (Fragment) OS=Homo sapiens OX=9606 GN	6	1	1	1	0	0	0	0	0	0	0	0	1	0	1	0	0	0	0	0	0	0	0	0	1	0	1	0	0	0	0	0	0	0	0	0	1	0	1	0	2
257	O75390;A0A0C4DGI3;B4DJV2;H0YIC4;F8W642;F8VZK9;F8VX07;F8VRP1;F8VX68;F8VPF9;F8VPA1;F8VTT8;F8W1S4;F8W4S1;H0YH82	O75390;A0A0C4DGI3;B4DJV2;H0YIC4	5;5;5;3;1;1;1;1;1;1;1;1;1;1;1	5;5;5;3;1;1;1;1;1;1;1;1;1;1;1	5;5;5;3;1;1;1;1;1;1;1;1;1;1;1	Citrate synthase, mitochondrial;Citrate synthase	CS	sp|O75390|CISY_HUMAN Citrate synthase, mitochondrial OS=Homo sapiens OX=9606 GN=CS PE=1 SV=2;tr|A0A0C4DGI3|A0A0C4DGI3_HUMAN Citrate synthase OS=Homo sapiens OX=9606 GN=CS PE=1 SV=1;tr|B4DJV2|B4DJV2_HUMAN Citrate synthase OS=Homo sapiens OX=9606 GN=CS PE=1	15	5	5	5	3	0	2	1	1	0	0	0	0	0	0	0	3	0	2	1	1	0	0	0	0	0	0	0	3	0	2	1	1	0	0	0	0	0	0	0	17.2
258	Q8WUH1;A0A0C4DGJ7;H0YIM9;H0YID9;H0YHA3;Q8WUH1-2;H0YJ25;H0YHB4;H0YIM3;Q8WUH1-3	Q8WUH1;A0A0C4DGJ7;H0YIM9;H0YID9;H0YHA3;Q8WUH1-2;H0YJ25;H0YHB4;H0YIM3;Q8WUH1-3	4;4;3;3;3;3;2;2;2;2	1;1;1;0;0;1;0;0;0;0	1;1;1;0;0;1;0;0;0;0	Protein Churchill	CHURC1;CHURC1-FNTB	sp|Q8WUH1|CHUR_HUMAN Protein Churchill OS=Homo sapiens OX=9606 GN=CHURC1 PE=1 SV=2;tr|A0A0C4DGJ7|A0A0C4DGJ7_HUMAN Protein Churchill OS=Homo sapiens OX=9606 GN=CHURC1 PE=3 SV=1;tr|H0YIM9|H0YIM9_HUMAN Protein Churchill (Fragment) OS=Homo sapiens OX=9606 GN=C	10	4	1	1	0	0	4	0	0	0	1	0	1	0	1	0	0	0	1	0	0	0	1	0	1	0	1	0	0	0	1	0	0	0	1	0	1	0	1	0	28.8
259	Q96DA0;A0A0C4DGN4;I3L1H9;I3L3X0	Q96DA0;A0A0C4DGN4	6;6;2;2	6;6;2;2	6;6;2;2	Zymogen granule protein 16 homolog B	ZG16B	sp|Q96DA0|ZG16B_HUMAN Zymogen granule protein 16 homolog B OS=Homo sapiens OX=9606 GN=ZG16B PE=1 SV=3;tr|A0A0C4DGN4|A0A0C4DGN4_HUMAN Zymogen granule protein 16 homolog B OS=Homo sapiens OX=9606 GN=ZG16B PE=1 SV=1	4	6	6	6	6	3	0	1	0	1	0	0	0	0	0	0	6	3	0	1	0	1	0	0	0	0	0	0	6	3	0	1	0	1	0	0	0	0	0	0	45.2
260	Q9Y2X7;Q9Y2X7-3;J3QQI0;J3QRU8;A0A0C4DGN6	Q9Y2X7;Q9Y2X7-3;J3QQI0;J3QRU8;A0A0C4DGN6	1;1;1;1;1	1;1;1;1;1	1;1;1;1;1	ARF GTPase-activating protein GIT1	GIT1	sp|Q9Y2X7|GIT1_HUMAN ARF GTPase-activating protein GIT1 OS=Homo sapiens OX=9606 GN=GIT1 PE=1 SV=2;sp|Q9Y2X7-3|GIT1_HUMAN Isoform 3 of ARF GTPase-activating protein GIT1 OS=Homo sapiens OX=9606 GN=GIT1;tr|J3QQI0|J3QQI0_HUMAN ARF GTPase-activating protein GI	5	1	1	1	0	0	0	0	0	0	0	0	1	0	1	0	0	0	0	0	0	0	0	0	1	0	1	0	0	0	0	0	0	0	0	0	1	0	1	0	3.3
261	P04632;K7EM73;K7ELJ7;A0A0C4DGQ5;K7EIV0;A0A075B7C0;K7ES78;K7EMQ1;U3KQE2;K7EKD8	P04632;K7EM73;K7ELJ7;A0A0C4DGQ5;K7EIV0;A0A075B7C0	3;3;3;3;2;2;1;1;1;1	3;3;3;3;2;2;1;1;1;1	3;3;3;3;2;2;1;1;1;1	Calpain small subunit 1	CAPNS1	sp|P04632|CPNS1_HUMAN Calpain small subunit 1 OS=Homo sapiens OX=9606 GN=CAPNS1 PE=1 SV=1;tr|K7EM73|K7EM73_HUMAN Calcium-activated neutral proteinase small subunit (Fragment) OS=Homo sapiens OX=9606 GN=CAPNS1 PE=1 SV=1;tr|K7ELJ7|K7ELJ7_HUMAN Calcium-activa	10	3	3	3	1	0	1	0	0	0	1	0	1	0	2	0	1	0	1	0	0	0	1	0	1	0	2	0	1	0	1	0	0	0	1	0	1	0	2	0	17.9
262	Q6IAN0;A0A0C4DGQ8;J3KRS1;J3QKT1;J3QLK1;J3QLJ8	Q6IAN0;A0A0C4DGQ8;J3KRS1	12;12;7;2;1;1	12;12;7;2;1;1	12;12;7;2;1;1	Dehydrogenase/reductase SDR family member 7B	DHRS7B	sp|Q6IAN0|DRS7B_HUMAN Dehydrogenase/reductase SDR family member 7B OS=Homo sapiens OX=9606 GN=DHRS7B PE=1 SV=2;tr|A0A0C4DGQ8|A0A0C4DGQ8_HUMAN Dehydrogenase/reductase SDR family member 7B OS=Homo sapiens OX=9606 GN=DHRS7B PE=1 SV=1;tr|J3KRS1|J3KRS1_HUMAN De	6	12	12	12	0	0	12	0	3	0	0	0	4	3	0	0	0	0	12	0	3	0	0	0	4	3	0	0	0	0	12	0	3	0	0	0	4	3	0	0	40.3
263	P39656;A0A0C4DGS1;P39656-3;P39656-2;U3KQ84	P39656;A0A0C4DGS1;P39656-3;P39656-2	21;21;18;17;9	21;21;18;17;9	21;21;18;17;9	Dolichyl-diphosphooligosaccharide--protein glycosyltransferase 48 kDa subunit	DDOST	sp|P39656|OST48_HUMAN Dolichyl-diphosphooligosaccharide--protein glycosyltransferase 48 kDa subunit OS=Homo sapiens OX=9606 GN=DDOST PE=1 SV=4;tr|A0A0C4DGS1|A0A0C4DGS1_HUMAN Dolichyl-diphosphooligosaccharide--protein glycosyltransferase 48 kDa subunit OS=H	5	21	21	21	8	8	18	9	11	6	8	4	16	9	9	5	8	8	18	9	11	6	8	4	16	9	9	5	8	8	18	9	11	6	8	4	16	9	9	5	76.5
264	Q9Y6K0;A0A0C4DGS9	Q9Y6K0;A0A0C4DGS9	4;4	4;4	4;4	Choline/ethanolaminephosphotransferase 1	CEPT1	sp|Q9Y6K0|CEPT1_HUMAN Choline/ethanolaminephosphotransferase 1 OS=Homo sapiens OX=9606 GN=CEPT1 PE=1 SV=1;tr|A0A0C4DGS9|A0A0C4DGS9_HUMAN Choline/ethanolaminephosphotransferase 1 OS=Homo sapiens OX=9606 GN=CEPT1 PE=1 SV=1	2	4	4	4	1	0	2	0	1	0	0	0	3	0	0	0	1	0	2	0	1	0	0	0	3	0	0	0	1	0	2	0	1	0	0	0	3	0	0	0	14.4
265	Q6DN90;A0A3B3IU98;A0A0C4DGT3;A0A2R8Y7T6;A0A3B3IRZ4;Q6DN90-2;Q6DN90-3;A0A2R8Y695	Q6DN90;A0A3B3IU98;A0A0C4DGT3;A0A2R8Y7T6;A0A3B3IRZ4;Q6DN90-2;Q6DN90-3;A0A2R8Y695	7;7;7;7;7;7;7;5	7;7;7;7;7;7;7;5	7;7;7;7;7;7;7;5	IQ motif and SEC7 domain-containing protein 1	IQSEC1	sp|Q6DN90|IQEC1_HUMAN IQ motif and SEC7 domain-containing protein 1 OS=Homo sapiens OX=9606 GN=IQSEC1 PE=1 SV=1;tr|A0A3B3IU98|A0A3B3IU98_HUMAN IQ motif and SEC7 domain-containing protein 1 (Fragment) OS=Homo sapiens OX=9606 GN=IQSEC1 PE=1 SV=1;tr|A0A0C4DGT	8	7	7	7	0	0	3	0	3	0	2	0	0	0	4	1	0	0	3	0	3	0	2	0	0	0	4	1	0	0	3	0	3	0	2	0	0	0	4	1	8.8
266	Q8WZ64;A0A0C4DGW1	Q8WZ64;A0A0C4DGW1	1;1	1;1	1;1	Arf-GAP with Rho-GAP domain, ANK repeat and PH domain-containing protein 2	ARAP2	sp|Q8WZ64|ARAP2_HUMAN Arf-GAP with Rho-GAP domain, ANK repeat and PH domain-containing protein 2 OS=Homo sapiens OX=9606 GN=ARAP2 PE=1 SV=3;tr|A0A0C4DGW1|A0A0C4DGW1_HUMAN Arf-GAP with Rho-GAP domain, ANK repeat and PH domain-containing protein 2 OS=Homo sa	2	1	1	1	0	0	0	1	1	0	0	0	0	1	0	1	0	0	0	1	1	0	0	0	0	1	0	1	0	0	0	1	1	0	0	0	0	1	0	1	0.9
267	A0A0C4DGW9;P50452;P50453;O75830;H7BXK7;C9J7N5;A0A1B0GU38;P30740-2;P50452-2	A0A0C4DGW9;P50452;P50453;O75830;H7BXK7;C9J7N5;A0A1B0GU38;P30740-2;P50452-2	2;1;1;1;1;1;1;1;1	1;0;0;0;0;0;0;0;0	1;0;0;0;0;0;0;0;0	Serpin B8;Serpin B9;Serpin I2;Leukocyte elastase inhibitor	SERPINI2;SERPINB8;SERPINB9;SERPINB1	tr|A0A0C4DGW9|A0A0C4DGW9_HUMAN Serpin I2 OS=Homo sapiens OX=9606 GN=SERPINI2 PE=1 SV=1;sp|P50452|SPB8_HUMAN Serpin B8 OS=Homo sapiens OX=9606 GN=SERPINB8 PE=1 SV=2;sp|P50453|SPB9_HUMAN Serpin B9 OS=Homo sapiens OX=9606 GN=SERPINB9 PE=1 SV=1;sp|O75830|SPI2_	9	2	1	1	1	0	0	0	0	0	1	0	0	0	1	1	0	0	0	0	0	0	0	0	0	0	0	1	0	0	0	0	0	0	0	0	0	0	0	1	4.6
268	A0A0C4DH25	A0A0C4DH25	2	1	1		IGKV3D-20	sp|A0A0C4DH25|KVD20_HUMAN Immunoglobulin kappa variable 3D-20 OS=Homo sapiens OX=9606 GN=IGKV3D-20 PE=3 SV=1	1	2	1	1	2	2	1	1	1	2	1	2	1	1	2	2	1	1	0	0	0	1	0	1	0	0	1	1	1	1	0	0	0	1	0	1	0	0	1	1	21.6
269	A0A0G2JQ40;A0A0G2JNF3;Q6H2G3;Q6H2G1;Q5UCE1;E0X074;C4N360;Q8N152;Q8NHK7;A0A0G2JLX2;A0A0G2JPV6;A0A1W2PP93;A0A1W2PS07;A0A0G2JN47;A0A0G2JMK7;Q15702;A0A0G2JM66;A0A0G2JM22;A0A0G2JNU1;A0A0G2JP89;A0A0G2JPH7;A0A1W2PRK8;A0A0C4ZLQ8	A0A0G2JQ40;A0A0G2JNF3;Q6H2G3;Q6H2G1;Q5UCE1;E0X074;C4N360;Q8N152;Q8NHK7;A0A0G2JLX2;A0A0G2JPV6;A0A1W2PP93;A0A1W2PS07;A0A0G2JN47;A0A0G2JMK7;Q15702;A0A0G2JM66;A0A0G2JM22;A0A0G2JNU1;A0A0G2JP89;A0A0G2JPH7;A0A1W2PRK8;A0A0C4ZLQ8	1;1;1;1;1;1;1;1;1;1;1;1;1;1;1;1;1;1;1;1;1;1;1	1;1;1;1;1;1;1;1;1;1;1;1;1;1;1;1;1;1;1;1;1;1;1	1;1;1;1;1;1;1;1;1;1;1;1;1;1;1;1;1;1;1;1;1;1;1		KIR3DL1	tr|A0A0G2JQ40|A0A0G2JQ40_HUMAN Killer cell immunoglobulin-like receptor 3DL1 (Fragment) OS=Homo sapiens OX=9606 GN=KIR3DL1 PE=4 SV=1;tr|A0A0G2JNF3|A0A0G2JNF3_HUMAN Killer cell immunoglobulin-like receptor 3DL1 OS=Homo sapiens OX=9606 GN=KIR3DL1 PE=1 SV=1;t	23	1	1	1	0	0	0	0	1	0	0	0	0	0	0	0	0	0	0	0	1	0	0	0	0	0	0	0	0	0	0	0	1	0	0	0	0	0	0	0	7.8
270	Q9P0P8;A0A0D9SEI0	Q9P0P8;A0A0D9SEI0	1;1	1;1	1;1	Uncharacterized protein C6orf203	C6orf203	sp|Q9P0P8|MRES1_HUMAN Mitochondrial transcription rescue factor 1 OS=Homo sapiens OX=9606 GN=MTRES1 PE=1 SV=1;tr|A0A0D9SEI0|A0A0D9SEI0_HUMAN Mitochondrial transcription rescue factor 1 OS=Homo sapiens OX=9606 GN=MTRES1 PE=1 SV=1	2	1	1	1	0	0	1	0	0	0	0	0	0	0	0	0	0	0	1	0	0	0	0	0	0	0	0	0	0	0	1	0	0	0	0	0	0	0	0	0	9.2
271	P21127;P21127-2;A0A0D9SER5;A0A0D9SEI3;P21127-3;A0A0D9SEN2;P21127-8;P21127-12;P21127-6;P21127-9;Q5QPR3;Q9UQ88-3;Q9UQ88-2;Q9UQ88;Q9UQ88-4;P21127-10;P21127-5;P21127-4;Q9UQ88-10;Q9UQ88-5;Q5QPR4;Q9UQ88-9;Q9UQ88-8;Q5QPQ9;E9PFJ2;Q13882;E7ESP2;J3KS35;A0A087X1I0;A0A087WYI9	P21127;P21127-2;A0A0D9SER5;A0A0D9SEI3;P21127-3;A0A0D9SEN2;P21127-8;P21127-12;P21127-6;P21127-9;Q5QPR3;Q9UQ88-3;Q9UQ88-2;Q9UQ88;Q9UQ88-4;P21127-10;P21127-5;P21127-4;Q9UQ88-10;Q9UQ88-5;Q5QPR4	18;18;18;18;18;18;18;17;17;17;17;17;17;17;17;17;17;17;16;16;16;7;7;1;1;1;1;1;1;1	18;18;18;18;18;18;18;17;17;17;17;17;17;17;17;17;17;17;16;16;16;7;7;1;1;1;1;1;1;1	18;18;18;18;18;18;18;17;17;17;17;17;17;17;17;17;17;17;16;16;16;7;7;1;1;1;1;1;1;1	Cyclin-dependent kinase 11B;Cyclin-dependent kinase 11A	CDK11B;CDK11A	sp|P21127|CD11B_HUMAN Cyclin-dependent kinase 11B OS=Homo sapiens OX=9606 GN=CDK11B PE=1 SV=4;sp|P21127-2|CD11B_HUMAN Isoform SV1 of Cyclin-dependent kinase 11B OS=Homo sapiens OX=9606 GN=CDK11B;tr|A0A0D9SER5|A0A0D9SER5_HUMAN Cyclin-dependent kinase 11B OS	30	18	18	18	0	0	16	0	0	0	0	0	13	0	0	0	0	0	16	0	0	0	0	0	13	0	0	0	0	0	16	0	0	0	0	0	13	0	0	0	28.2
272	Q96EK7;A0A0D9SEJ5;F5GY05;Q96EK7-2;Q96EK7-3	Q96EK7;A0A0D9SEJ5;F5GY05;Q96EK7-2	29;29;29;24;7	29;29;29;24;7	29;29;29;24;7	Constitutive coactivator of peroxisome proliferator-activated receptor gamma	FAM120B	sp|Q96EK7|F120B_HUMAN Constitutive coactivator of peroxisome proliferator-activated receptor gamma OS=Homo sapiens OX=9606 GN=FAM120B PE=1 SV=1;tr|A0A0D9SEJ5|A0A0D9SEJ5_HUMAN Constitutive coactivator of peroxisome proliferator-activated receptor gamma OS=H	5	29	29	29	0	15	1	7	2	11	7	21	1	16	7	28	0	15	1	7	2	11	7	21	1	16	7	28	0	15	1	7	2	11	7	21	1	16	7	28	41.1
273	A0A0D9SEM9	A0A0D9SEM9	8	1	1		DDX39A	tr|A0A0D9SEM9|A0A0D9SEM9_HUMAN ATP-dependent RNA helicase DDX39A (Fragment) OS=Homo sapiens OX=9606 GN=DDX39A PE=1 SV=1	1	8	1	1	1	4	2	5	1	2	2	3	1	7	4	3	1	0	0	0	1	0	1	0	0	0	1	0	1	0	0	0	1	0	1	0	0	0	1	0	60.4
274	Q8N6H7;A0A0D9SF70;G5E9L0;E9PQP3;E9PIY6;E9PMR9;E9PM63;E9PNY8;E9PMU9;E9PJT7;H0YDN9;E9PK28;E9PN48;Q8N6H7-3;Q8N6H7-2;E9PM18	Q8N6H7;A0A0D9SF70;G5E9L0;E9PQP3;E9PIY6;E9PMR9;E9PM63;E9PNY8;E9PMU9;E9PJT7;H0YDN9;E9PK28;E9PN48;Q8N6H7-3;Q8N6H7-2	4;4;4;3;3;2;2;2;2;2;2;2;2;2;2;1	3;3;3;2;2;1;1;1;1;1;2;1;1;2;2;1	3;3;3;2;2;1;1;1;1;1;2;1;1;2;2;1	ADP-ribosylation factor GTPase-activating protein 2	ARFGAP2	sp|Q8N6H7|ARFG2_HUMAN ADP-ribosylation factor GTPase-activating protein 2 OS=Homo sapiens OX=9606 GN=ARFGAP2 PE=1 SV=1;tr|A0A0D9SF70|A0A0D9SF70_HUMAN ADP-ribosylation factor GTPase-activating protein 2 OS=Homo sapiens OX=9606 GN=ARFGAP2 PE=1 SV=1;tr|G5E9L0	16	4	3	3	0	0	2	0	0	0	1	0	2	0	1	0	0	0	2	0	0	0	0	0	1	0	0	0	0	0	2	0	0	0	0	0	1	0	0	0	14.8
275	P08319;A0A0D9SFB5;P08319-2;H0Y9N0;D6RIB1;D6R9K8	P08319;A0A0D9SFB5;P08319-2;H0Y9N0;D6RIB1;D6R9K8	2;2;2;1;1;1	2;2;2;1;1;1	2;2;2;1;1;1	Alcohol dehydrogenase 4	ADH4	sp|P08319|ADH4_HUMAN All-trans-retinol dehydrogenase [NAD(+)] ADH4 OS=Homo sapiens OX=9606 GN=ADH4 PE=1 SV=5;tr|A0A0D9SFB5|A0A0D9SFB5_HUMAN All-trans-retinol dehydrogenase [NAD(+)] ADH4 OS=Homo sapiens OX=9606 GN=ADH4 PE=1 SV=1;sp|P08319-2|ADH4_HUMAN Isofo	6	2	2	2	0	0	2	0	0	0	0	0	0	0	0	0	0	0	2	0	0	0	0	0	0	0	0	0	0	0	2	0	0	0	0	0	0	0	0	0	11.6
276	Q13286;O95086;A0A1B0GWD3;Q13286-3;Q13286-7;Q13286-2;B4DFF3;Q13286-4;A0A1B0GV71;A0A1B0GW34;Q2TA70;A0A0D9SFH9;H3BR00;A0A1B0GUX3;A0A1B0GV41;F6TI76;Q13286-6;Q9UBD8;H3BQ48;O95090;Q13286-5;H3BMN4;H3BNK7	Q13286;O95086;A0A1B0GWD3;Q13286-3;Q13286-7;Q13286-2;B4DFF3;Q13286-4;A0A1B0GV71;A0A1B0GW34;Q2TA70;A0A0D9SFH9;H3BR00;A0A1B0GUX3;A0A1B0GV41;F6TI76;Q13286-6;Q9UBD8;H3BQ48;O95090;Q13286-5;H3BMN4;H3BNK7	2;2;2;2;2;2;2;2;2;2;2;2;1;1;1;1;1;1;1;1;1;1;1	2;2;2;2;2;2;2;2;2;2;2;2;1;1;1;1;1;1;1;1;1;1;1	2;2;2;2;2;2;2;2;2;2;2;2;1;1;1;1;1;1;1;1;1;1;1	Battenin	CLN3	sp|Q13286|CLN3_HUMAN Battenin OS=Homo sapiens OX=9606 GN=CLN3 PE=1 SV=1;tr|O95086|O95086_HUMAN Battenin OS=Homo sapiens OX=9606 GN=CLN3 PE=1 SV=1;tr|A0A1B0GWD3|A0A1B0GWD3_HUMAN Battenin OS=Homo sapiens OX=9606 PE=1 SV=1;sp|Q13286-3|CLN3_HUMAN Isoform 3 of	23	2	2	2	0	0	2	0	0	0	0	0	1	0	0	0	0	0	2	0	0	0	0	0	1	0	0	0	0	0	2	0	0	0	0	0	1	0	0	0	7.3
277	Q92614;Q92614-4;Q92614-3;A0A0D9SFK2;Q92614-2;Q92614-5;H0YEV9;A0A1B0GWJ6	Q92614;Q92614-4;Q92614-3;A0A0D9SFK2;Q92614-2;Q92614-5	41;41;41;41;31;27;5;1	41;41;41;41;31;27;5;1	41;41;41;41;31;27;5;1	Unconventional myosin-XVIIIa	MYO18A	sp|Q92614|MY18A_HUMAN Unconventional myosin-XVIIIa OS=Homo sapiens OX=9606 GN=MYO18A PE=1 SV=3;sp|Q92614-4|MY18A_HUMAN Isoform 4 of Unconventional myosin-XVIIIa OS=Homo sapiens OX=9606 GN=MYO18A;sp|Q92614-3|MY18A_HUMAN Isoform 3 of Unconventional myosin-XV	8	41	41	41	1	6	12	9	0	3	0	4	13	28	0	4	1	6	12	9	0	3	0	4	13	28	0	4	1	6	12	9	0	3	0	4	13	28	0	4	30
278	Q149N8;Q149N8-2;A0A0D9SFM0;Q149N8-4	Q149N8;Q149N8-2;A0A0D9SFM0;Q149N8-4	2;2;2;2	2;2;2;2	2;2;2;2	E3 ubiquitin-protein ligase SHPRH	SHPRH	sp|Q149N8|SHPRH_HUMAN E3 ubiquitin-protein ligase SHPRH OS=Homo sapiens OX=9606 GN=SHPRH PE=1 SV=2;sp|Q149N8-2|SHPRH_HUMAN Isoform 2 of E3 ubiquitin-protein ligase SHPRH OS=Homo sapiens OX=9606 GN=SHPRH;tr|A0A0D9SFM0|A0A0D9SFM0_HUMAN E3 ubiquitin-protein l	4	2	2	2	0	1	0	0	0	0	0	0	1	0	0	0	0	1	0	0	0	0	0	0	1	0	0	0	0	1	0	0	0	0	0	0	1	0	0	0	1.1
279	Q02218;A0A0D9SFS3;E9PCR7;E9PFG7;E9PDF2;Q02218-2;Q02218-3;Q9ULD0;C9J4G7;Q9ULD0-3;Q9ULD0-2	Q02218;A0A0D9SFS3;E9PCR7;E9PFG7;E9PDF2;Q02218-2;Q02218-3	4;4;4;3;3;3;2;1;1;1;1	4;4;4;3;3;3;2;1;1;1;1	4;4;4;3;3;3;2;1;1;1;1	2-oxoglutarate dehydrogenase, mitochondrial	OGDH	sp|Q02218|ODO1_HUMAN 2-oxoglutarate dehydrogenase, mitochondrial OS=Homo sapiens OX=9606 GN=OGDH PE=1 SV=3;tr|A0A0D9SFS3|A0A0D9SFS3_HUMAN 2-oxoglutarate dehydrogenase, mitochondrial OS=Homo sapiens OX=9606 GN=OGDH PE=1 SV=1;tr|E9PCR7|E9PCR7_HUMAN 2-oxoglut	11	4	4	4	0	0	0	0	0	0	0	0	4	0	1	0	0	0	0	0	0	0	0	0	4	0	1	0	0	0	0	0	0	0	0	0	4	0	1	0	7
280	A0A0D9SGE8;Q5JRC6;Q8IWS0-3;Q8IWS0-2;Q8IWS0-4	A0A0D9SGE8;Q5JRC6;Q8IWS0-3;Q8IWS0-2;Q8IWS0-4	13;12;12;11;10	1;1;0;1;0	1;1;0;1;0	PHD finger protein 6	PHF6	tr|A0A0D9SGE8|A0A0D9SGE8_HUMAN PHD finger protein 6 OS=Homo sapiens OX=9606 GN=PHF6 PE=1 SV=1;tr|Q5JRC6|Q5JRC6_HUMAN PHD finger protein 6 OS=Homo sapiens OX=9606 GN=PHF6 PE=1 SV=1;sp|Q8IWS0-3|PHF6_HUMAN Isoform 3 of PHD finger protein 6 OS=Homo sapiens OX=	5	13	1	1	0	4	10	2	0	2	0	1	1	2	0	1	0	0	1	0	0	0	0	0	0	0	0	0	0	0	1	0	0	0	0	0	0	0	0	0	56
281	O43426;O43426-4;J3KPK1;C9JFZ1;A0A0D9SGJ6;J3KQV8;O43426-2;C9JW66;O43426-5;C9J1Z6	O43426;O43426-4;J3KPK1;C9JFZ1;A0A0D9SGJ6;J3KQV8;O43426-2;C9JW66;O43426-5	8;8;8;8;8;8;8;6;5;2	8;8;8;8;8;8;8;6;5;2	8;8;8;8;8;8;8;6;5;2	Synaptojanin-1	SYNJ1	sp|O43426|SYNJ1_HUMAN Synaptojanin-1 OS=Homo sapiens OX=9606 GN=SYNJ1 PE=1 SV=2;sp|O43426-4|SYNJ1_HUMAN Isoform 3 of Synaptojanin-1 OS=Homo sapiens OX=9606 GN=SYNJ1;tr|J3KPK1|J3KPK1_HUMAN Phosphoinositide 5-phosphatase OS=Homo sapiens OX=9606 GN=SYNJ1 PE=1	10	8	8	8	0	0	0	0	1	0	3	0	0	0	5	0	0	0	0	0	1	0	3	0	0	0	5	0	0	0	0	0	1	0	3	0	0	0	5	0	7.8
282	Q2TAK8;J3KNX4;A0A0D9SGJ8;Q2TAK8-3;K7EP97;Q2TAK8-2	Q2TAK8;J3KNX4;A0A0D9SGJ8;Q2TAK8-3;K7EP97;Q2TAK8-2	3;3;3;3;2;2	3;3;3;3;2;2	3;3;3;3;2;2	PWWP domain-containing protein MUM1	MUM1	sp|Q2TAK8|PWP3A_HUMAN PWWP domain-containing DNA repair factor 3A OS=Homo sapiens OX=9606 GN=PWWP3A PE=1 SV=3;tr|J3KNX4|J3KNX4_HUMAN PWWP domain-containing DNA repair factor 3A OS=Homo sapiens OX=9606 GN=PWWP3A PE=1 SV=1;tr|A0A0D9SGJ8|A0A0D9SGJ8_HUMAN PWWP	6	3	3	3	0	0	0	0	0	0	0	0	0	3	0	0	0	0	0	0	0	0	0	0	0	3	0	0	0	0	0	0	0	0	0	0	0	3	0	0	7.7
283	O60610;O60610-2;H9KV28;A0A2R8Y5N1;A0A140T8Z0;A0A0G2JH68;O60610-3	O60610;O60610-2;H9KV28;A0A2R8Y5N1;A0A140T8Z0;A0A0G2JH68;O60610-3	3;3;3;3;3;3;3	3;3;3;3;3;3;3	3;3;3;3;3;3;3	Protein diaphanous homolog 1	DIAPH1	sp|O60610|DIAP1_HUMAN Protein diaphanous homolog 1 OS=Homo sapiens OX=9606 GN=DIAPH1 PE=1 SV=2;sp|O60610-2|DIAP1_HUMAN Isoform 2 of Protein diaphanous homolog 1 OS=Homo sapiens OX=9606 GN=DIAPH1;tr|H9KV28|H9KV28_HUMAN Protein diaphanous homolog 1 OS=Homo s	7	3	3	3	0	0	1	0	0	0	0	0	2	0	0	0	0	0	1	0	0	0	0	0	2	0	0	0	0	0	1	0	0	0	0	0	2	0	0	0	2.7
284	Q6NYC8;A0A0G2JHC2;Q6NYC8-2	Q6NYC8;A0A0G2JHC2;Q6NYC8-2	1;1;1	1;1;1	1;1;1	Phostensin	PPP1R18	sp|Q6NYC8|PPR18_HUMAN Phostensin OS=Homo sapiens OX=9606 GN=PPP1R18 PE=1 SV=1;tr|A0A0G2JHC2|A0A0G2JHC2_HUMAN PPP1R18 OS=Homo sapiens OX=9606 GN=PPP1R18 PE=1 SV=1;sp|Q6NYC8-2|PPR18_HUMAN Isoform 2 of Phostensin OS=Homo sapiens OX=9606 GN=PPP1R18	3	1	1	1	0	0	0	0	0	0	1	0	0	1	0	0	0	0	0	0	0	0	1	0	0	1	0	0	0	0	0	0	0	0	1	0	0	1	0	0	3.8
285	Q9Y676;A0A0G2JIC6	Q9Y676;A0A0G2JIC6	4;4	4;4	4;4	28S ribosomal protein S18b, mitochondrial	MRPS18B	sp|Q9Y676|RT18B_HUMAN 28S ribosomal protein S18b, mitochondrial OS=Homo sapiens OX=9606 GN=MRPS18B PE=1 SV=1;tr|A0A0G2JIC6|A0A0G2JIC6_HUMAN 28S ribosomal protein S18b, mitochondrial OS=Homo sapiens OX=9606 GN=MRPS18B PE=1 SV=1	2	4	4	4	1	0	2	1	1	0	0	0	0	0	0	0	1	0	2	1	1	0	0	0	0	0	0	0	1	0	2	1	1	0	0	0	0	0	0	0	31.8
286	Q96KQ7;Q96KQ7-2;A0A0G2JIS2;A2ABF8;A0A0G2JIR1;A2ABF9;A0A0G2JK64;A0A0G2JRR0;A0A0G2JRN8;H0Y4K5;Q96KQ7-3	Q96KQ7;Q96KQ7-2;A0A0G2JIS2;A2ABF8;A0A0G2JIR1;A2ABF9;A0A0G2JK64;A0A0G2JRR0;A0A0G2JRN8	13;13;13;12;12;12;12;11;11;4;1	13;13;13;12;12;12;12;11;11;4;1	13;13;13;12;12;12;12;11;11;4;1	Histone-lysine N-methyltransferase EHMT2	EHMT2	sp|Q96KQ7|EHMT2_HUMAN Histone-lysine N-methyltransferase EHMT2 OS=Homo sapiens OX=9606 GN=EHMT2 PE=1 SV=3;sp|Q96KQ7-2|EHMT2_HUMAN Isoform 2 of Histone-lysine N-methyltransferase EHMT2 OS=Homo sapiens OX=9606 GN=EHMT2;tr|A0A0G2JIS2|A0A0G2JIS2_HUMAN Histone-	11	13	13	13	0	6	0	8	0	9	0	3	0	7	0	3	0	6	0	8	0	9	0	3	0	7	0	3	0	6	0	8	0	9	0	3	0	7	0	3	14.6
287	Q9H633;A0A0G2JJY3;A0A0G2JJ26;A0A140T9R9;A0A0G2JIT5;Q9H633-3;Q9H633-4	Q9H633;A0A0G2JJY3;A0A0G2JJ26;A0A140T9R9;A0A0G2JIT5;Q9H633-3;Q9H633-4	1;1;1;1;1;1;1	1;1;1;1;1;1;1	1;1;1;1;1;1;1	Ribonuclease P protein subunit p21	RPP21	sp|Q9H633|RPP21_HUMAN Ribonuclease P protein subunit p21 OS=Homo sapiens OX=9606 GN=RPP21 PE=1 SV=1;tr|A0A0G2JJY3|A0A0G2JJY3_HUMAN Ribonuclease P protein subunit p21 OS=Homo sapiens OX=9606 GN=RPP21 PE=1 SV=1;tr|A0A0G2JJ26|A0A0G2JJ26_HUMAN Ribonuclease P p	7	1	1	1	0	0	1	0	0	0	0	0	0	0	0	0	0	0	1	0	0	0	0	0	0	0	0	0	0	0	1	0	0	0	0	0	0	0	0	0	14.9
288	P0DMV8;A0A0G2JIW1;P0DMV9;P0DMV8-2;V9GZ37	P0DMV8;A0A0G2JIW1;P0DMV9;P0DMV8-2;V9GZ37	32;32;32;28;22	30;30;30;26;21	16;16;16;13;10	Heat shock 70 kDa protein 1A;Heat shock 70 kDa protein 1B	HSPA1A;HSPA1B	sp|P0DMV8|HS71A_HUMAN Heat shock 70 kDa protein 1A OS=Homo sapiens OX=9606 GN=HSPA1A PE=1 SV=1;tr|A0A0G2JIW1|A0A0G2JIW1_HUMAN Heat shock 70 kDa protein 1B OS=Homo sapiens OX=9606 GN=HSPA1B PE=1 SV=1;sp|P0DMV9|HS71B_HUMAN Heat shock 70 kDa protein 1B OS=Hom	5	32	30	16	29	9	20	7	28	12	13	1	6	1	10	1	27	7	19	5	27	10	11	0	6	0	8	0	14	6	10	3	14	6	7	0	3	0	4	0	66
289	A0A140T9L0;A0A0G2JJL1	A0A140T9L0;A0A0G2JJL1	8;8	1;1	1;1			tr|A0A140T9L0|A0A140T9L0_HUMAN WD repeat-containing protein 46 (Fragment) OS=Homo sapiens OX=9606 GN=WDR46 PE=1 SV=1;tr|A0A0G2JJL1|A0A0G2JJL1_HUMAN WD repeat-containing protein 46 (Fragment) OS=Homo sapiens OX=9606 GN=WDR46 PE=1 SV=1	2	8	1	1	0	6	2	7	0	7	0	0	0	6	0	3	0	1	1	1	0	1	0	0	0	1	0	1	0	1	1	1	0	1	0	0	0	1	0	1	41.6
290	P28702;A0A0G2JKR7;P28702-3;P19793;A0A5F9ZHH6;P19793-2;P48443;A0A0G2JHI1;A0A087WZ88	P28702;A0A0G2JKR7;P28702-3;P19793;A0A5F9ZHH6;P19793-2	6;6;6;3;3;3;2;2;2	6;6;6;3;3;3;2;2;2	6;6;6;3;3;3;2;2;2	Retinoic acid receptor RXR-beta;Retinoic acid receptor RXR-alpha	RXRB;RXRA	sp|P28702|RXRB_HUMAN Retinoic acid receptor RXR-beta OS=Homo sapiens OX=9606 GN=RXRB PE=1 SV=2;tr|A0A0G2JKR7|A0A0G2JKR7_HUMAN Retinoic acid receptor RXR-beta OS=Homo sapiens OX=9606 GN=RXRB PE=1 SV=1;sp|P28702-3|RXRB_HUMAN Isoform 2 of Retinoic acid recept	9	6	6	6	0	3	0	2	0	4	0	3	0	5	0	0	0	3	0	2	0	4	0	3	0	5	0	0	0	3	0	2	0	4	0	3	0	5	0	0	14.3
291	A0A140T9S0;A0A0G2JLV0;Q03519;A0A087WYD6;X5CMH5;E7ENX8;Q03519-2	A0A140T9S0;A0A0G2JLV0;Q03519;A0A087WYD6;X5CMH5;E7ENX8;Q03519-2	3;3;2;2;2;2;2	3;3;2;2;2;2;2	3;3;2;2;2;2;2	Antigen peptide transporter 2	TAP2	tr|A0A140T9S0|A0A140T9S0_HUMAN Antigen peptide transporter 2 OS=Homo sapiens OX=9606 GN=TAP2 PE=1 SV=1;tr|A0A0G2JLV0|A0A0G2JLV0_HUMAN Antigen peptide transporter 2 OS=Homo sapiens OX=9606 GN=TAP2 PE=1 SV=1;sp|Q03519|TAP2_HUMAN Antigen peptide transporter 2	7	3	3	3	0	0	2	0	0	0	0	0	1	0	0	0	0	0	2	0	0	0	0	0	1	0	0	0	0	0	2	0	0	0	0	0	1	0	0	0	5.5
292	A0A0G2JMG9;Q6ZN08;A6NN14;F5H2M4;A0A0A0MTN5;A6NNF4-3;A0A087WUU8;A0A0A0MR41;A0A087X0A2;A0A0G2JQ90;Q68DY1-2;A0A075B7G6;A0A3B3ITU2;Q9Y2Q1-3;A0A0G2JP77;A0A087WZJ7;A0A087X1I5;O75437;A0A0A0MS76;Q6ZR52-2;Q96H40;P0DKX0;Q68DY1;O75373;Q8TD23;Q8IYN0;Q9P255;Q6ZR52;A6NK75;A6NNF4;Q8N7Q3;P17019;M0R1D1	A0A0G2JMG9;Q6ZN08;A6NN14;F5H2M4;A0A0A0MTN5;A6NNF4-3;A0A087WUU8;A0A0A0MR41;A0A087X0A2;A0A0G2JQ90;Q68DY1-2;A0A075B7G6;A0A3B3ITU2;Q9Y2Q1-3;A0A0G2JP77;A0A087WZJ7;A0A087X1I5;O75437;A0A0A0MS76;Q6ZR52-2;Q96H40;P0DKX0;Q68DY1;O75373;Q8TD23;Q8IYN0;Q9P255;Q6ZR52;A6NK75;A6NNF4;Q8N7Q3;P17019;M0R1D1	3;3;2;2;2;2;2;2;2;2;2;2;2;2;2;2;2;2;2;2;2;2;2;2;2;2;2;2;2;2;2;2;2	1;1;0;0;0;0;0;0;0;0;0;0;0;0;0;0;0;0;0;0;0;0;0;0;0;0;0;0;0;0;0;0;0	1;1;0;0;0;0;0;0;0;0;0;0;0;0;0;0;0;0;0;0;0;0;0;0;0;0;0;0;0;0;0;0;0	Putative zinc finger protein 66;Zinc finger protein 729;Zinc finger protein 726;Zinc finger protein 626;Zinc finger protein 257;Zinc finger protein 254;Zinc finger protein 493;Zinc finger protein 486;Zinc finger protein 728;Zinc finger protein 737;Zinc finger protein 675;Zinc finger protein 100;Zinc finger protein 492;Zinc finger protein 98;Zinc finger protein 676;Zinc finger protein 708	ZNF66;ZNF729;ZNF254;ZNF100;ZNF726;ZNF708;ZNF626;ZNF257;ZNF99;ZNF493;ZNF486;ZNF728;ZNF737;ZNF675;ZNF492;ZNF98;ZNF676	tr|A0A0G2JMG9|A0A0G2JMG9_HUMAN Putative zinc finger protein 66 OS=Homo sapiens OX=9606 GN=ZNF66 PE=1 SV=1;sp|Q6ZN08|ZNF66_HUMAN Putative zinc finger protein 66 OS=Homo sapiens OX=9606 GN=ZNF66 PE=5 SV=3;sp|A6NN14|ZN729_HUMAN Zinc finger protein 729 OS=Homo	33	3	1	1	0	1	0	0	0	0	0	1	0	0	0	1	0	1	0	0	0	0	0	0	0	0	0	0	0	1	0	0	0	0	0	0	0	0	0	0	5.8
293	Q6IE36;A0A0G2JMS6	Q6IE36;A0A0G2JMS6	1;1	1;1	1;1	Ovostatin homolog 2	OVOS2	sp|Q6IE36|OVOS2_HUMAN Ovostatin homolog 2 OS=Homo sapiens OX=9606 GN=OVOS2 PE=2 SV=2;tr|A0A0G2JMS6|A0A0G2JMS6_HUMAN Uncharacterized protein OS=Homo sapiens OX=9606 PE=3 SV=1	2	1	1	1	1	0	0	0	0	0	0	0	0	1	0	0	1	0	0	0	0	0	0	0	0	1	0	0	1	0	0	0	0	0	0	0	0	1	0	0	0.6
294	Q16625;Q16625-3;A0A0G2JMZ8;Q16625-5;Q16625-4;Q16625-2	Q16625;Q16625-3;A0A0G2JMZ8;Q16625-5;Q16625-4;Q16625-2	1;1;1;1;1;1	1;1;1;1;1;1	1;1;1;1;1;1	Occludin	OCLN	sp|Q16625|OCLN_HUMAN Occludin OS=Homo sapiens OX=9606 GN=OCLN PE=1 SV=1;sp|Q16625-3|OCLN_HUMAN Isoform 3 of Occludin OS=Homo sapiens OX=9606 GN=OCLN;tr|A0A0G2JMZ8|A0A0G2JMZ8_HUMAN Occludin OS=Homo sapiens OX=9606 GN=OCLN PE=1 SV=1;sp|Q16625-5|OCLN_HUMAN Is	6	1	1	1	0	0	0	0	0	0	0	0	0	1	0	0	0	0	0	0	0	0	0	0	0	1	0	0	0	0	0	0	0	0	0	0	0	1	0	0	2.3
295	Q7Z3B3;A0A1W2PRB5;A0A0J9YVS1;A0A0G2JQF5;A0A3B3IT55;A0A0G2JNB1;A0A0G2JQF4;A0A0G2JNT7;A0A1W2PPV8;Q7Z3B3-4;Q7Z3B3-2;A0A0G2JRW7;I3L243;A0A1W2PS83;A0A1W2PQT4;I3L233	Q7Z3B3;A0A1W2PRB5;A0A0J9YVS1;A0A0G2JQF5;A0A3B3IT55;A0A0G2JNB1;A0A0G2JQF4;A0A0G2JNT7;A0A1W2PPV8;Q7Z3B3-4;Q7Z3B3-2	3;3;3;3;3;3;3;3;2;2;2;1;1;1;1;1	3;3;3;3;3;3;3;3;2;2;2;1;1;1;1;1	3;3;3;3;3;3;3;3;2;2;2;1;1;1;1;1	KAT8 regulatory NSL complex subunit 1	KANSL1	sp|Q7Z3B3|KANL1_HUMAN KAT8 regulatory NSL complex subunit 1 OS=Homo sapiens OX=9606 GN=KANSL1 PE=1 SV=2;tr|A0A1W2PRB5|A0A1W2PRB5_HUMAN KAT8 regulatory NSL complex subunit 1 OS=Homo sapiens OX=9606 GN=KANSL1 PE=1 SV=1;tr|A0A0J9YVS1|A0A0J9YVS1_HUMAN KAT8 reg	16	3	3	3	0	0	0	0	0	0	0	0	0	3	0	0	0	0	0	0	0	0	0	0	0	3	0	0	0	0	0	0	0	0	0	0	0	3	0	0	4.5
296	Q04118;A0A0G2JPD0;A0A0G2JNB4;F5H7C1	Q04118;A0A0G2JPD0;A0A0G2JNB4;F5H7C1	3;3;3;3	3;3;3;3	2;2;2;2	Basic salivary proline-rich protein 3	PRB3	sp|Q04118|PRB3_HUMAN Basic salivary proline-rich protein 3 OS=Homo sapiens OX=9606 GN=PRB3 PE=1 SV=2;tr|A0A0G2JPD0|A0A0G2JPD0_HUMAN Basic salivary proline-rich protein 3 OS=Homo sapiens OX=9606 GN=PRB3 PE=1 SV=1;tr|A0A0G2JNB4|A0A0G2JNB4_HUMAN Basic salivar	4	3	3	2	3	0	1	0	1	0	0	0	0	0	1	0	3	0	1	0	1	0	0	0	0	0	1	0	2	0	1	0	1	0	0	0	0	0	1	0	7.4
297	O75943;H0Y9J8;A0A0G2JNH5;A0A0G2JP78;A0A0G2JPT5;O75943-3;O75943-4;O75943-2	O75943;H0Y9J8;A0A0G2JNH5;A0A0G2JP78;A0A0G2JPT5;O75943-3;O75943-4;O75943-2	1;1;1;1;1;1;1;1	1;1;1;1;1;1;1;1	1;1;1;1;1;1;1;1	Cell cycle checkpoint protein RAD17	RAD17	sp|O75943|RAD17_HUMAN Cell cycle checkpoint protein RAD17 OS=Homo sapiens OX=9606 GN=RAD17 PE=1 SV=2;tr|H0Y9J8|H0Y9J8_HUMAN Cell cycle checkpoint protein RAD17 (Fragment) OS=Homo sapiens OX=9606 GN=RAD17 PE=1 SV=1;tr|A0A0G2JNH5|A0A0G2JNH5_HUMAN Cell cycle	8	1	1	1	0	0	1	0	0	0	0	0	0	0	0	0	0	0	1	0	0	0	0	0	0	0	0	0	0	0	1	0	0	0	0	0	0	0	0	0	1.2
298	Q14160;Q14160-3;A0A0G2JNZ2;A0A0G2JPP5;A0A669KB89;Q14160-2;A0A0G2JMS7;H0YCG0;A0A669KAX5	Q14160;Q14160-3;A0A0G2JNZ2;A0A0G2JPP5;A0A669KB89;Q14160-2;A0A0G2JMS7	31;31;31;31;31;27;27;6;4	31;31;31;31;31;27;27;6;4	25;25;25;25;25;24;24;6;3	Protein scribble homolog	SCRIB	sp|Q14160|SCRIB_HUMAN Protein scribble homolog OS=Homo sapiens OX=9606 GN=SCRIB PE=1 SV=4;sp|Q14160-3|SCRIB_HUMAN Isoform 3 of Protein scribble homolog OS=Homo sapiens OX=9606 GN=SCRIB;tr|A0A0G2JNZ2|A0A0G2JNZ2_HUMAN Protein scribble homolog OS=Homo sapiens	9	31	31	25	0	12	16	16	1	15	1	12	13	15	3	9	0	12	16	16	1	15	1	12	13	15	3	9	0	10	13	15	0	14	0	11	10	13	1	8	32.1
299	P0C0L4;A0A140TA49;A0A140TA44;A0A140TA32;A0A0G2JPR0;P0C0L4-2;P0C0L5;F5GXS0;A0A140TA29;A0A0G2JL54;A0A3B3ISA6	P0C0L4;A0A140TA49;A0A140TA44;A0A140TA32;A0A0G2JPR0;P0C0L4-2;P0C0L5;F5GXS0;A0A140TA29;A0A0G2JL54;A0A3B3ISA6	4;4;4;4;4;4;3;3;3;3;2	4;4;4;4;4;4;3;3;3;3;2	2;2;2;2;2;2;2;2;2;2;2	Complement C4-A;Complement C4 beta chain;Complement C4-A alpha chain;C4a anaphylatoxin;C4b-A;C4d-A;Complement C4 gamma chain;Complement C4-B;Complement C4 beta chain;Complement C4-B alpha chain;C4a anaphylatoxin;C4b-B;C4d-B;Complement C4 gamma chain	C4A;C4B	sp|P0C0L4|CO4A_HUMAN Complement C4-A OS=Homo sapiens OX=9606 GN=C4A PE=1 SV=2;tr|A0A140TA49|A0A140TA49_HUMAN C4a anaphylatoxin OS=Homo sapiens OX=9606 GN=C4A PE=1 SV=1;tr|A0A140TA44|A0A140TA44_HUMAN C4a anaphylatoxin OS=Homo sapiens OX=9606 GN=C4A PE=1 SV=	11	4	4	2	3	3	0	1	1	1	3	3	0	1	0	2	3	3	0	1	1	1	3	3	0	1	0	2	2	2	0	0	0	0	2	2	0	0	0	0	3.8
300	Q6DKJ4;A0A0G2JQK5	Q6DKJ4;A0A0G2JQK5	2;2	2;2	2;2	Nucleoredoxin	NXN	sp|Q6DKJ4|NXN_HUMAN Nucleoredoxin OS=Homo sapiens OX=9606 GN=NXN PE=1 SV=2;tr|A0A0G2JQK5|A0A0G2JQK5_HUMAN Nucleoredoxin (Fragment) OS=Homo sapiens OX=9606 GN=NXN PE=1 SV=1	2	2	2	2	0	0	0	0	0	0	0	0	1	0	1	0	0	0	0	0	0	0	0	0	1	0	1	0	0	0	0	0	0	0	0	0	1	0	1	0	8
301	A0A0G2JR96;A0A0G2JQT1;A0A0G2JQH3;A0A087WVZ5;A0A0G2JRX2;A0A087WU52;A0A0G2JRV9;A0A087WWL1;A0A087WV63;A0A0G2JRF5;A0A087WWY5;A0A087WZL7	A0A0G2JR96;A0A0G2JQT1	24;24;5;5;3;3;3;3;1;1;1;1	1;1;0;0;0;0;0;0;0;0;0;0	1;1;0;0;0;0;0;0;0;0;0;0			tr|A0A0G2JR96|A0A0G2JR96_HUMAN Cytoplasmic FMR1-interacting protein 1 (Fragment) OS=Homo sapiens OX=9606 GN=CYFIP1 PE=1 SV=4;tr|A0A0G2JQT1|A0A0G2JQT1_HUMAN Cytoplasmic FMR1-interacting protein 1 (Fragment) OS=Homo sapiens OX=9606 GN=CYFIP1 PE=1 SV=4	12	24	1	1	3	3	12	1	8	3	2	2	13	3	15	2	0	0	0	0	0	0	0	0	0	0	1	0	0	0	0	0	0	0	0	0	0	0	1	0	34.1
302	Q9UHX1;Q9UHX1-6;A0A0J9YXX5;Q9UHX1-2;Q9UHX1-3;Q9UHX1-4;A0A0J9YVP6;A0A0J9YXJ8;Q9UHX1-5;A0A0J9YYL3;A0A0J9YWM1;A0A0J9YVR6;E9PQ56;H0YEM1;H0YCP8;E9PN18;E9PMU7;E9PL19	Q9UHX1;Q9UHX1-6;A0A0J9YXX5;Q9UHX1-2;Q9UHX1-3;Q9UHX1-4;A0A0J9YVP6;A0A0J9YXJ8;Q9UHX1-5;A0A0J9YYL3;A0A0J9YWM1;A0A0J9YVR6;E9PQ56;H0YEM1;H0YCP8	12;12;12;12;12;12;12;12;12;12;9;9;9;9;6;5;4;3	12;12;12;12;12;12;12;12;12;12;9;9;9;9;6;5;4;3	12;12;12;12;12;12;12;12;12;12;9;9;9;9;6;5;4;3	Poly(U)-binding-splicing factor PUF60	PUF60	sp|Q9UHX1|PUF60_HUMAN Poly(U)-binding-splicing factor PUF60 OS=Homo sapiens OX=9606 GN=PUF60 PE=1 SV=1;sp|Q9UHX1-6|PUF60_HUMAN Isoform 6 of Poly(U)-binding-splicing factor PUF60 OS=Homo sapiens OX=9606 GN=PUF60;tr|A0A0J9YXX5|A0A0J9YXX5_HUMAN 60 kDa poly(U)	18	12	12	12	3	2	0	1	0	4	11	0	0	0	5	0	3	2	0	1	0	4	11	0	0	0	5	0	3	2	0	1	0	4	11	0	0	0	5	0	32.9
303	Q9P1Y6;E9PJ24;B7ZM65;F8WEF5;A0A0J9YYB5;A0A0J9YWD5;Q9P1Y6-3;A0A0J9YX88;Q9P1Y6-2	Q9P1Y6;E9PJ24;B7ZM65;F8WEF5;A0A0J9YYB5;A0A0J9YWD5;Q9P1Y6-3;A0A0J9YX88;Q9P1Y6-2	6;6;6;6;6;6;6;5;5	6;6;6;6;6;6;6;5;5	6;6;6;6;6;6;6;5;5	PHD and RING finger domain-containing protein 1	PHRF1	sp|Q9P1Y6|PHRF1_HUMAN PHD and RING finger domain-containing protein 1 OS=Homo sapiens OX=9606 GN=PHRF1 PE=1 SV=3;tr|E9PJ24|E9PJ24_HUMAN PHD and RING finger domain-containing protein 1 OS=Homo sapiens OX=9606 GN=PHRF1 PE=1 SV=1;tr|B7ZM65|B7ZM65_HUMAN PHD an	9	6	6	6	0	0	5	2	0	2	0	0	0	0	0	0	0	0	5	2	0	2	0	0	0	0	0	0	0	0	5	2	0	2	0	0	0	0	0	0	6.7
304	A0A0J9YX35	A0A0J9YX35	3	1	1			sp|A0A0J9YX35|HV64D_HUMAN Immunoglobulin heavy variable 3-64D OS=Homo sapiens OX=9606 GN=IGHV3-64D PE=3 SV=1	1	3	1	1	1	2	0	0	0	0	1	1	0	1	0	1	1	1	0	0	0	0	1	1	0	0	0	0	1	1	0	0	0	0	1	1	0	0	0	0	24.8
305	A0A0J9YXA4;H0YCH1	A0A0J9YXA4;H0YCH1	1;1	1;1	1;1		DEAF1	tr|A0A0J9YXA4|A0A0J9YXA4_HUMAN Deformed epidermal autoregulatory factor 1 homolog (Fragment) OS=Homo sapiens OX=9606 GN=DEAF1 PE=1 SV=1;tr|H0YCH1|H0YCH1_HUMAN Deformed epidermal autoregulatory factor 1 homolog (Fragment) OS=Homo sapiens OX=9606 GN=DEAF1 PE	2	1	1	1	0	0	0	0	0	0	0	0	0	0	1	1	0	0	0	0	0	0	0	0	0	0	1	1	0	0	0	0	0	0	0	0	0	0	1	1	11.2
306	A0A0J9YXC7;P0CW19-2	A0A0J9YXC7	5;2	1;0	1;0			tr|A0A0J9YXC7|A0A0J9YXC7_HUMAN LIM and senescent cell antigen-like-containing domain protein OS=Homo sapiens OX=9606 GN=LIMS4 PE=4 SV=1	2	5	1	1	2	1	3	1	1	1	1	0	0	1	2	0	1	0	0	0	0	0	0	0	0	0	0	0	1	0	0	0	0	0	0	0	0	0	0	0	16.3
307	A0A0J9YXF2;Q15165;Q15165-3;Q15165-1;G3XAK4;A0A0J9YXU7;A0A0J9YYJ1;A0A2Q2SAK4;A0A0J9YXM1;A0A0J9YYF0;A0A0J9YYF3	A0A0J9YXF2;Q15165;Q15165-3;Q15165-1;G3XAK4	13;12;11;11;7;4;3;2;2;1;1	13;12;11;11;7;4;3;2;2;1;1	13;12;11;11;7;4;3;2;2;1;1	Serum paraoxonase/arylesterase 2	PON2	tr|A0A0J9YXF2|A0A0J9YXF2_HUMAN Paraoxonase 2, isoform CRA_a OS=Homo sapiens OX=9606 GN=PON2 PE=1 SV=1;sp|Q15165|PON2_HUMAN Serum paraoxonase/arylesterase 2 OS=Homo sapiens OX=9606 GN=PON2 PE=1 SV=4;sp|Q15165-3|PON2_HUMAN Isoform 3 of Serum paraoxonase/aryl	11	13	13	13	1	1	13	1	1	0	0	1	6	0	0	0	1	1	13	1	1	0	0	1	6	0	0	0	1	1	13	1	1	0	0	1	6	0	0	0	63.7
308	A0A0J9YXF8;Q16378	A0A0J9YXF8;Q16378	1;1	1;1	1;1	Proline-rich protein 4	PRR4	tr|A0A0J9YXF8|A0A0J9YXF8_HUMAN Proline-rich protein 4 OS=Homo sapiens OX=9606 GN=PRR4 PE=1 SV=1;sp|Q16378|PROL4_HUMAN Proline-rich protein 4 OS=Homo sapiens OX=9606 GN=PRR4 PE=1 SV=3	2	1	1	1	1	0	0	0	0	0	0	0	0	0	0	0	1	0	0	0	0	0	0	0	0	0	0	0	1	0	0	0	0	0	0	0	0	0	0	0	5.4
309	Q562E7;A0A0J9YXM6;Q562E7-4;E9PDG3;Q562E7-2;Q562E7-6;Q562E7-5;Q562E7-3	Q562E7;A0A0J9YXM6;Q562E7-4	10;10;9;2;2;2;2;2	10;10;9;2;2;2;2;2	10;10;9;2;2;2;2;2	WD repeat-containing protein 81	WDR81	sp|Q562E7|WDR81_HUMAN WD repeat-containing protein 81 OS=Homo sapiens OX=9606 GN=WDR81 PE=1 SV=2;tr|A0A0J9YXM6|A0A0J9YXM6_HUMAN WD repeat-containing protein 81 OS=Homo sapiens OX=9606 GN=WDR81 PE=1 SV=1;sp|Q562E7-4|WDR81_HUMAN Isoform 4 of WD repeat-contai	8	10	10	10	0	0	0	0	2	0	0	0	4	0	7	0	0	0	0	0	2	0	0	0	4	0	7	0	0	0	0	0	2	0	0	0	4	0	7	0	9
310	Q96Q06;A0A0J9YXN7;Q96Q06-2	Q96Q06;A0A0J9YXN7;Q96Q06-2	3;3;3	3;3;3	3;3;3	Perilipin-4	PLIN4	sp|Q96Q06|PLIN4_HUMAN Perilipin-4 OS=Homo sapiens OX=9606 GN=PLIN4 PE=1 SV=2;tr|A0A0J9YXN7|A0A0J9YXN7_HUMAN Perilipin-4 OS=Homo sapiens OX=9606 GN=PLIN4 PE=1 SV=1;sp|Q96Q06-2|PLIN4_HUMAN Isoform 2 of Perilipin-4 OS=Homo sapiens OX=9606 GN=PLIN4	3	3	3	3	0	0	0	0	0	0	3	0	0	0	1	0	0	0	0	0	0	0	3	0	0	0	1	0	0	0	0	0	0	0	3	0	0	0	1	0	7.4
311	P43243;A0A0R4J2E8;D6REM6;D6R991;H0Y8T4;B3KM87;D6RBK5;D6RIA2;D6R8Z5;D6RE02;D6RBI2;D6REK4;D6RCM3;A0A1B0GX04;D6RBS2;D6RAY2;D6RAM9;D6R9F3;D6RB45	P43243;A0A0R4J2E8;D6REM6;D6R991	58;58;56;41;23;20;5;5;4;3;3;3;3;2;2;2;2;2;2	58;58;56;41;23;20;5;5;4;3;3;3;3;2;2;2;2;2;2	0;0;0;0;0;0;0;0;0;0;0;0;0;0;0;0;0;0;0	Matrin-3	MATR3	sp|P43243|MATR3_HUMAN Matrin-3 OS=Homo sapiens OX=9606 GN=MATR3 PE=1 SV=2;tr|A0A0R4J2E8|A0A0R4J2E8_HUMAN Matrin-3 OS=Homo sapiens OX=9606 GN=MATR3 PE=1 SV=1;tr|D6REM6|D6REM6_HUMAN Matrin-3 OS=Homo sapiens OX=9606 GN=MATR3 PE=1 SV=1;tr|D6R991|D6R991_HUMAN M	19	58	58	0	3	45	5	42	10	47	3	47	8	48	8	48	3	45	5	42	10	47	3	47	8	48	8	48	0	0	0	0	0	0	0	0	0	0	0	0	68.1
312	Q12894;A0A0R4J2F6;Q12894-2;H7C444;H7C2Z4	Q12894;A0A0R4J2F6;Q12894-2	10;10;10;4;2	10;10;10;4;2	10;10;10;4;2	Interferon-related developmental regulator 2	IFRD2	sp|Q12894|IFRD2_HUMAN Interferon-related developmental regulator 2 OS=Homo sapiens OX=9606 GN=IFRD2 PE=1 SV=3;tr|A0A0R4J2F6|A0A0R4J2F6_HUMAN Interferon-related developmental regulator 2 OS=Homo sapiens OX=9606 GN=IFRD2 PE=1 SV=1;sp|Q12894-2|IFRD2_HUMAN Iso	5	10	10	10	0	0	10	0	1	0	0	0	0	0	0	0	0	0	10	0	1	0	0	0	0	0	0	0	0	0	10	0	1	0	0	0	0	0	0	0	27.3
313	P07225;G5E9F8;A0A3B3ISJ1;A0A0S2Z4L3;A0A3B3IUA6;A0A3B3IRK9	P07225;G5E9F8;A0A3B3ISJ1;A0A0S2Z4L3;A0A3B3IUA6;A0A3B3IRK9	2;2;2;2;1;1	2;2;2;2;1;1	2;2;2;2;1;1	Vitamin K-dependent protein S	PROS1	sp|P07225|PROS_HUMAN Vitamin K-dependent protein S OS=Homo sapiens OX=9606 GN=PROS1 PE=1 SV=1;tr|G5E9F8|G5E9F8_HUMAN Vitamin K-dependent protein S OS=Homo sapiens OX=9606 GN=PROS1 PE=1 SV=2;tr|A0A3B3ISJ1|A0A3B3ISJ1_HUMAN Vitamin K-dependent protein S OS=Ho	6	2	2	2	0	0	1	0	1	0	0	0	0	0	0	0	0	0	1	0	1	0	0	0	0	0	0	0	0	0	1	0	1	0	0	0	0	0	0	0	3.6
314	A0A0U1RQK7;O43432;A0A0A0MSA7;O43432-3;O43432-4;O43432-2;B1AN91;B1AN92	A0A0U1RQK7;O43432;A0A0A0MSA7;O43432-3;O43432-4	29;27;27;27;24;4;1;1	24;22;22;22;19;4;1;1	24;22;22;22;19;4;1;1	Eukaryotic translation initiation factor 4 gamma 3	EIF4G3	tr|A0A0U1RQK7|A0A0U1RQK7_HUMAN Eukaryotic translation initiation factor 4 gamma 3 OS=Homo sapiens OX=9606 GN=EIF4G3 PE=1 SV=1;sp|O43432|IF4G3_HUMAN Eukaryotic translation initiation factor 4 gamma 3 OS=Homo sapiens OX=9606 GN=EIF4G3 PE=1 SV=2;tr|A0A0A0MSA7	8	29	24	24	2	0	18	0	1	0	8	0	16	0	8	0	2	0	13	0	1	0	8	0	13	0	6	0	2	0	13	0	1	0	8	0	13	0	6	0	23.3
315	Q5VZK9;A0A0U1RQQ1;Q5VZK9-2	Q5VZK9;A0A0U1RQQ1;Q5VZK9-2	3;3;3	3;3;3	3;3;3	Leucine-rich repeat-containing protein 16A	LRRC16A	sp|Q5VZK9|CARL1_HUMAN F-actin-uncapping protein LRRC16A OS=Homo sapiens OX=9606 GN=CARMIL1 PE=1 SV=1;tr|A0A0U1RQQ1|A0A0U1RQQ1_HUMAN F-actin-uncapping protein LRRC16A (Fragment) OS=Homo sapiens OX=9606 GN=CARMIL1 PE=1 SV=1;sp|Q5VZK9-2|CARL1_HUMAN Isoform 2	3	3	3	3	1	0	0	0	0	0	1	0	0	0	2	0	1	0	0	0	0	0	1	0	0	0	2	0	1	0	0	0	0	0	1	0	0	0	2	0	2.7
316	Q6P3W7;A0A0U1RQQ9;F8VSC5;H0YIK6	Q6P3W7;A0A0U1RQQ9;F8VSC5	10;10;9;2	10;10;9;2	10;10;9;2	SCY1-like protein 2	SCYL2	sp|Q6P3W7|SCYL2_HUMAN SCY1-like protein 2 OS=Homo sapiens OX=9606 GN=SCYL2 PE=1 SV=1;tr|A0A0U1RQQ9|A0A0U1RQQ9_HUMAN SCY1-like protein 2 OS=Homo sapiens OX=9606 GN=SCYL2 PE=1 SV=1;tr|F8VSC5|F8VSC5_HUMAN SCY1-like protein 2 (Fragment) OS=Homo sapiens OX=9606	4	10	10	10	8	2	0	1	6	1	2	0	1	1	2	0	8	2	0	1	6	1	2	0	1	1	2	0	8	2	0	1	6	1	2	0	1	1	2	0	15.5
317	B3KNS4;A0A0U1RQS5;A0A0U1RQL9;A0A0U1RQV1;A0A0U1RQN3;Q96A10	B3KNS4;A0A0U1RQS5;A0A0U1RQL9;A0A0U1RQV1	5;5;3;3;2;1	5;5;3;3;2;1	5;5;3;3;2;1		hCG_2043597	tr|B3KNS4|B3KNS4_HUMAN Endogenous retrovirus group K3 member 1 OS=Homo sapiens OX=9606 GN=ERVK3-1 PE=1 SV=1;tr|A0A0U1RQS5|A0A0U1RQS5_HUMAN Endogenous retrovirus group K3 member 1 (Fragment) OS=Homo sapiens OX=9606 GN=ERVK3-1 PE=1 SV=1;tr|A0A0U1RQL9|A0A0U1R	6	5	5	5	5	1	5	2	5	1	4	1	2	1	4	1	5	1	5	2	5	1	4	1	2	1	4	1	5	1	5	2	5	1	4	1	2	1	4	1	50.5
318	Q16563;A0A0U1RQT9;C9JYN0;Q16563-2	Q16563;A0A0U1RQT9;C9JYN0;Q16563-2	1;1;1;1	1;1;1;1	1;1;1;1	Synaptophysin-like protein 1	SYPL1	sp|Q16563|SYPL1_HUMAN Synaptophysin-like protein 1 OS=Homo sapiens OX=9606 GN=SYPL1 PE=1 SV=1;tr|A0A0U1RQT9|A0A0U1RQT9_HUMAN Synaptophysin-like protein 1 (Fragment) OS=Homo sapiens OX=9606 GN=SYPL1 PE=1 SV=1;tr|C9JYN0|C9JYN0_HUMAN Synaptophysin-like protei	4	1	1	1	0	0	1	0	0	0	0	0	0	0	0	0	0	0	1	0	0	0	0	0	0	0	0	0	0	0	1	0	0	0	0	0	0	0	0	0	4.2
319	P0DPI3;A0A0U1RR11;A0A0U1RRI6	P0DPI3;A0A0U1RR11;A0A0U1RRI6	1;1;1	1;1;1	1;1;1			sp|P0DPI3|CENL2_HUMAN Centromere protein V-like protein 2 OS=Homo sapiens OX=9606 GN=CENPVL2 PE=3 SV=1;sp|A0A0U1RR11|CENL1_HUMAN Centromere protein V-like protein 1 OS=Homo sapiens OX=9606 GN=CENPVL1 PE=2 SV=1;sp|A0A0U1RRI6|CENL3_HUMAN Centromere protein V	3	1	1	1	0	0	0	1	0	0	0	1	0	1	0	0	0	0	0	1	0	0	0	1	0	1	0	0	0	0	0	1	0	0	0	1	0	1	0	0	2.9
320	P0C0S8;Q99878;Q9BTM1;Q93077;Q7L7L0;P04908;Q96KK5;P20671;A0A0U1RR32;A0A0U1RRH7;H0YFX9;A0A3B3IS11;Q9BTM1-2;Q71UI9-5	P0C0S8;Q99878;Q9BTM1;Q93077;Q7L7L0;P04908;Q96KK5;P20671;A0A0U1RR32;A0A0U1RRH7;H0YFX9;A0A3B3IS11;Q9BTM1-2	4;4;4;4;4;4;4;4;4;4;3;3;3;1	2;2;2;2;2;2;2;2;2;2;2;1;1;0	0;0;0;0;0;0;0;0;0;0;0;0;0;0	Histone H2A type 1;Histone H2A type 1-J;Histone H2A.J;Histone H2A type 1-C;Histone H2A type 3;Histone H2A type 1-B/E;Histone H2A type 1-H;Histone H2A type 1-D;Histone H2A	HIST1H2AG;HIST1H2AJ;H2AFJ;HIST1H2AC;HIST3H2A;HIST1H2AB;HIST1H2AH;HIST1H2AD	sp|P0C0S8|H2A1_HUMAN Histone H2A type 1 OS=Homo sapiens OX=9606 GN=H2AC11 PE=1 SV=2;sp|Q99878|H2A1J_HUMAN Histone H2A type 1-J OS=Homo sapiens OX=9606 GN=H2AC14 PE=1 SV=3;sp|Q9BTM1|H2AJ_HUMAN Histone H2A.J OS=Homo sapiens OX=9606 GN=H2AJ PE=1 SV=1;sp|Q9307	14	4	2	0	3	4	3	4	1	4	4	2	3	3	2	4	2	2	2	2	0	2	2	1	2	2	1	2	0	0	0	0	0	0	0	0	0	0	0	0	49.2
321	A0A0U1RR49	A0A0U1RR49	6	2	2			tr|A0A0U1RR49|A0A0U1RR49_HUMAN Protein transport protein Sec24C (Fragment) OS=Homo sapiens OX=9606 GN=SEC24C PE=1 SV=1	1	6	2	2	6	1	1	1	6	1	4	0	2	1	5	1	2	0	0	0	2	0	1	0	0	0	2	0	2	0	0	0	2	0	1	0	0	0	2	0	54.1
322	O94880;A0A0U1RRH6;O94880-2;B4DG57	O94880;A0A0U1RRH6;O94880-2;B4DG57	20;20;17;17	20;20;17;17	20;20;17;17	PHD finger protein 14	PHF14	sp|O94880|PHF14_HUMAN PHD finger protein 14 OS=Homo sapiens OX=9606 GN=PHF14 PE=1 SV=2;tr|A0A0U1RRH6|A0A0U1RRH6_HUMAN PHD finger protein 14 OS=Homo sapiens OX=9606 GN=PHF14 PE=1 SV=1;sp|O94880-2|PHF14_HUMAN Isoform 2 of PHD finger protein 14 OS=Homo sapien	4	20	20	20	0	7	0	16	0	12	0	14	0	12	0	14	0	7	0	16	0	12	0	14	0	12	0	14	0	7	0	16	0	12	0	14	0	12	0	14	29.1
323	Q9BPX6;F6XEV2;A0A0U1RRK1;A0A286YF11;Q9BPX6-3;Q9BPX6-5;Q9BPX6-4;Q9BPX6-2;E9PQV6;S4R3W3;S4R3V1;S4R3D7	Q9BPX6;F6XEV2;A0A0U1RRK1;A0A286YF11;Q9BPX6-3;Q9BPX6-5;Q9BPX6-4;Q9BPX6-2;E9PQV6;S4R3W3	6;6;6;6;6;5;5;5;4;3;2;2	6;6;6;6;6;5;5;5;4;3;2;2	6;6;6;6;6;5;5;5;4;3;2;2	Calcium uptake protein 1, mitochondrial	MICU1	sp|Q9BPX6|MICU1_HUMAN Calcium uptake protein 1, mitochondrial OS=Homo sapiens OX=9606 GN=MICU1 PE=1 SV=1;tr|F6XEV2|F6XEV2_HUMAN Calcium uptake protein 1, mitochondrial OS=Homo sapiens OX=9606 GN=MICU1 PE=1 SV=2;tr|A0A0U1RRK1|A0A0U1RRK1_HUMAN Calcium uptake	12	6	6	6	0	0	5	0	0	0	0	0	2	0	0	0	0	0	5	0	0	0	0	0	2	0	0	0	0	0	5	0	0	0	0	0	2	0	0	0	16
324	Q8WXI9;A0A0U1RRM1;A0A0U1RR30;A0A0U1RRK3;A0A0U1RR34;A0A1B0GW07	Q8WXI9;A0A0U1RRM1;A0A0U1RR30	10;10;5;3;3;1	9;9;4;3;3;1	9;9;4;3;3;1	Transcriptional repressor p66-beta	GATAD2B	sp|Q8WXI9|P66B_HUMAN Transcriptional repressor p66-beta OS=Homo sapiens OX=9606 GN=GATAD2B PE=1 SV=1;tr|A0A0U1RRM1|A0A0U1RRM1_HUMAN Transcriptional repressor p66-beta OS=Homo sapiens OX=9606 GN=GATAD2B PE=1 SV=1;tr|A0A0U1RR30|A0A0U1RR30_HUMAN Transcription	6	10	9	9	0	3	0	6	0	2	0	1	0	7	0	2	0	2	0	5	0	1	0	0	0	6	0	1	0	2	0	5	0	1	0	0	0	6	0	1	26.8
325	A0A0U1RRM6	A0A0U1RRM6	18	18	3			tr|A0A0U1RRM6|A0A0U1RRM6_HUMAN Protein enabled homolog OS=Homo sapiens OX=9606 GN=ENAH PE=1 SV=1	1	18	18	3	3	0	1	0	2	0	17	0	1	0	15	0	3	0	1	0	2	0	17	0	1	0	15	0	0	0	0	0	0	0	3	0	0	0	3	0	34.3
326	Q96AC1;Q96AC1-2;A0A0U1RRM8;H0YJ34;Q96AC1-3;G3V1L6	Q96AC1;Q96AC1-2;A0A0U1RRM8;H0YJ34;Q96AC1-3;G3V1L6	2;2;2;2;2;1	2;2;2;2;2;1	1;1;1;1;1;0	Fermitin family homolog 2	FERMT2;FERMT1	sp|Q96AC1|FERM2_HUMAN Fermitin family homolog 2 OS=Homo sapiens OX=9606 GN=FERMT2 PE=1 SV=1;sp|Q96AC1-2|FERM2_HUMAN Isoform 2 of Fermitin family homolog 2 OS=Homo sapiens OX=9606 GN=FERMT2;tr|A0A0U1RRM8|A0A0U1RRM8_HUMAN Fermitin family homolog 2 (Fragment)	6	2	2	1	2	0	0	0	2	1	0	0	0	0	0	0	2	0	0	0	2	1	0	0	0	0	0	0	1	0	0	0	1	0	0	0	0	0	0	0	3.7
327	Q5XG87;A0A0X1KG68;Q5XG87-2	Q5XG87;A0A0X1KG68;Q5XG87-2	2;2;1	2;2;1	2;2;1	Non-canonical poly(A) RNA polymerase PAPD7	PAPD7	sp|Q5XG87|PAPD7_HUMAN Terminal nucleotidyltransferase 4A OS=Homo sapiens OX=9606 GN=TENT4A PE=1 SV=3;tr|A0A0X1KG68|A0A0X1KG68_HUMAN Terminal nucleotidyltransferase 4A OS=Homo sapiens OX=9606 GN=TENT4A PE=1 SV=1;sp|Q5XG87-2|PAPD7_HUMAN Isoform 2 of Terminal	3	2	2	2	0	0	1	0	1	0	0	0	0	0	0	0	0	0	1	0	1	0	0	0	0	0	0	0	0	0	1	0	1	0	0	0	0	0	0	0	4.9
328	A0A140T930;O78179;A0A140T912;A0A1W2PRZ0;A0A140T937;A0A0G2JL56;Q5SRN5;A0A0G2JIF2;A0A1W2PSE7;P04439;A0A0G2JI36;Q5SUL5;A0A1W2PQD0;A0A1W2PS24;P04439-2;Q5SRN7;D9J307	A0A140T930;O78179;A0A140T912;A0A1W2PRZ0;A0A140T937;A0A0G2JL56;Q5SRN5;A0A0G2JIF2;A0A1W2PSE7;P04439;A0A0G2JI36;Q5SUL5;A0A1W2PQD0;A0A1W2PS24;P04439-2;Q5SRN7;D9J307	4;4;4;4;4;3;3;3;3;3;3;3;3;3;3;3;2	1;1;1;1;1;1;1;1;1;1;1;1;1;1;1;1;1	0;0;0;0;0;0;0;0;0;0;0;0;0;0;0;0;0	HLA class I histocompatibility antigen, A-3 alpha chain	HLA-C;HLA-A;HLA-B	tr|A0A140T930|A0A140T930_HUMAN HLA class I histocompatibility antigen, C alpha chain OS=Homo sapiens OX=9606 GN=HLA-C PE=1 SV=1;tr|O78179|O78179_HUMAN HLA class I histocompatibility antigen, C alpha chain OS=Homo sapiens OX=9606 GN=HLA-C PE=1 SV=1;tr|A0A14	17	4	1	0	0	0	0	0	0	0	0	0	4	1	0	0	0	0	0	0	0	0	0	0	1	0	0	0	0	0	0	0	0	0	0	0	0	0	0	0	15.9
329	A0A1W2PRT9;A0A140T913;A0A140T955;A0A140T933;Q53Z42;A0A140T9I0;A0A1W2PPQ2;A0A140T9X5;A0A1W2PRU9;A0A140T921;O19617;A0A140T9H5;A2AEA2;A0A140T9U8;P10321-2;P10321;A0A140T9M5;A0A140TA21;A0A140TA19;A0A140T9Q4;A0A140T9L3;A0A140T942;A0A140T9E1;A0A1W2PNR7;A0A140T9D4;A0A140TA02;A0A140TA05;A0A140T9S7	A0A1W2PRT9;A0A140T913;A0A140T955;A0A140T933;Q53Z42;A0A140T9I0;A0A1W2PPQ2;A0A140T9X5;A0A1W2PRU9;A0A140T921;O19617;A0A140T9H5;A2AEA2;A0A140T9U8;P10321-2;P10321	5;5;5;5;5;5;5;5;3;3;3;3;3;3;3;3;2;1;1;1;1;1;1;1;1;1;1;1	5;5;5;5;5;5;5;5;3;3;3;3;3;3;3;3;2;1;1;1;1;1;1;1;1;1;1;1	2;2;2;2;2;2;2;2;1;1;1;1;1;1;1;1;0;0;0;0;0;0;0;0;0;0;0;0	HLA class I histocompatibility antigen, Cw-7 alpha chain	HLA-A;HLA-C	tr|A0A1W2PRT9|A0A1W2PRT9_HUMAN HLA class I histocompatibility antigen, A alpha chain OS=Homo sapiens OX=9606 GN=HLA-A PE=1 SV=1;tr|A0A140T913|A0A140T913_HUMAN HLA class I histocompatibility antigen, A alpha chain OS=Homo sapiens OX=9606 GN=HLA-A PE=1 SV=1;	28	5	5	2	0	0	2	0	0	0	0	0	3	1	0	0	0	0	2	0	0	0	0	0	3	1	0	0	0	0	2	0	0	0	0	0	0	0	0	0	22.1
330	A0A140T975;A0A140T941;A0A1W2PQS8;Q9GJ45;A0A1W2PS39;A0A140T9Z6;Q5RJ27;B0UXQ0	A0A140T975;A0A140T941;A0A1W2PQS8;Q9GJ45;A0A1W2PS39;A0A140T9Z6;Q5RJ27;B0UXQ0	4;4;4;4;4;4;4;4	1;1;1;1;1;1;1;1	0;0;0;0;0;0;0;0		HLA-A	tr|A0A140T975|A0A140T975_HUMAN HLA class I histocompatibility antigen, A alpha chain OS=Homo sapiens OX=9606 GN=HLA-A PE=1 SV=1;tr|A0A140T941|A0A140T941_HUMAN HLA class I histocompatibility antigen, A alpha chain OS=Homo sapiens OX=9606 GN=HLA-A PE=1 SV=1;	8	4	1	0	0	0	0	0	0	0	0	0	4	1	0	0	0	0	0	0	0	0	0	0	1	0	0	0	0	0	0	0	0	0	0	0	0	0	0	0	21.1
331	Q03518;A0A140T9T7;A0A0S2Z4R8	Q03518;A0A140T9T7;A0A0S2Z4R8	5;5;4	5;5;4	5;5;4	Antigen peptide transporter 1	TAP1	sp|Q03518|TAP1_HUMAN Antigen peptide transporter 1 OS=Homo sapiens OX=9606 GN=TAP1 PE=1 SV=2;tr|A0A140T9T7|A0A140T9T7_HUMAN Antigen peptide transporter 1 OS=Homo sapiens OX=9606 GN=TAP1 PE=1 SV=1;tr|A0A0S2Z4R8|A0A0S2Z4R8_HUMAN Antigen peptide transporter 1	3	5	5	5	0	0	5	0	0	0	0	0	0	0	0	0	0	0	5	0	0	0	0	0	0	0	0	0	0	0	5	0	0	0	0	0	0	0	0	0	14.1
332	Q99942;A0A140TA09	Q99942;A0A140TA09	2;2	2;2	2;2	E3 ubiquitin-protein ligase RNF5	RNF5	sp|Q99942|RNF5_HUMAN E3 ubiquitin-protein ligase RNF5 OS=Homo sapiens OX=9606 GN=RNF5 PE=1 SV=1;tr|A0A140TA09|A0A140TA09_HUMAN E3 ubiquitin-protein ligase RNF5 OS=Homo sapiens OX=9606 GN=RNF5 PE=1 SV=1	2	2	2	2	0	0	2	0	0	0	0	0	0	0	0	0	0	0	2	0	0	0	0	0	0	0	0	0	0	0	2	0	0	0	0	0	0	0	0	0	9.4
333	A0A140TA69;A0A140TA62;O76011;CON__sp|C_O76011|KRT34_HUMAN;C_O76011	A0A140TA69;A0A140TA62;O76011;CON__sp|C_O76011|KRT34_HUMAN;C_O76011	9;8;7;7;7	3;3;3;3;3	1;1;1;1;1	Keratin, type I cuticular Ha4	KRT34	tr|A0A140TA69|A0A140TA69_HUMAN Keratin, type I cuticular Ha4 OS=Homo sapiens OX=9606 GN=KRT34 PE=3 SV=1;tr|A0A140TA62|A0A140TA62_HUMAN IF rod domain-containing protein OS=Homo sapiens OX=9606 PE=3 SV=2;sp|O76011|KRT34_HUMAN Keratin, type I cuticular Ha4 OS	5	9	3	1	0	4	0	0	0	0	1	1	0	5	1	1	0	2	0	0	0	0	0	0	0	0	1	0	0	1	0	0	0	0	0	0	0	0	0	0	27.5
334	Q5XKP0;A0A140TA86;K7EIR2;A0A140TA84	Q5XKP0;A0A140TA86;K7EIR2;A0A140TA84	3;3;2;2	3;3;2;2	3;3;2;2	Protein QIL1	QIL1;C19orf70	sp|Q5XKP0|MIC13_HUMAN MICOS complex subunit MIC13 OS=Homo sapiens OX=9606 GN=MICOS13 PE=1 SV=1;tr|A0A140TA86|A0A140TA86_HUMAN MICOS complex subunit MIC13 OS=Homo sapiens OX=9606 GN=MICOS13 PE=1 SV=1;tr|K7EIR2|K7EIR2_HUMAN MICOS complex subunit MIC13 OS=Hom	4	3	3	3	0	0	3	0	0	0	0	0	1	0	0	0	0	0	3	0	0	0	0	0	1	0	0	0	0	0	3	0	0	0	0	0	1	0	0	0	62.7
335	O75787;A0A1B0GTB0;O75787-2;A0A1C7CYW4;A0A1B0GVW0;A0A1B0GVB9;A0A1B0GVC7;A0A1B0GWJ8;H7C3E1;A0A1B0GTU8;A0A1B0GU12;B7Z413;A0A1B0GUT7;B7Z1I9;A0A1B0GVI9;A0A1B0GWD6;H7C240;A0A1B0GV60;A0A1B0GW13;A0A1B0GVZ1	O75787;A0A1B0GTB0;O75787-2;A0A1C7CYW4;A0A1B0GVW0;A0A1B0GVB9;A0A1B0GVC7;A0A1B0GWJ8;H7C3E1;A0A1B0GTU8;A0A1B0GU12;B7Z413;A0A1B0GUT7;B7Z1I9;A0A1B0GVI9;A0A1B0GWD6	3;3;3;3;3;3;3;3;3;3;3;3;2;2;2;2;1;1;1;1	3;3;3;3;3;3;3;3;3;3;3;3;2;2;2;2;1;1;1;1	3;3;3;3;3;3;3;3;3;3;3;3;2;2;2;2;1;1;1;1	Renin receptor	ATP6AP2	sp|O75787|RENR_HUMAN Renin receptor OS=Homo sapiens OX=9606 GN=ATP6AP2 PE=1 SV=2;tr|A0A1B0GTB0|A0A1B0GTB0_HUMAN ATPase H(+)-transporting lysosomal accessory protein 2 (Fragment) OS=Homo sapiens OX=9606 GN=ATP6AP2 PE=1 SV=1;sp|O75787-2|RENR_HUMAN Isoform 2	20	3	3	3	0	0	3	0	0	0	0	0	0	0	0	0	0	0	3	0	0	0	0	0	0	0	0	0	0	0	3	0	0	0	0	0	0	0	0	0	11.7
336	Q9C0B1;A0A1B0GTZ8;X6R3I0;A0A1B0GUY7;A0A1B0GTI3;A0A1B0GUC3;A0A1B0GV98;A0A1B0GTC5;A0A1B0GU26;A0A1B0GTC3;A0A1B0GVH5;Q9C0B1-4;Q9C0B1-2	Q9C0B1;A0A1B0GTZ8;X6R3I0;A0A1B0GUY7;A0A1B0GTI3;A0A1B0GUC3;A0A1B0GV98;A0A1B0GTC5;A0A1B0GU26;A0A1B0GTC3;A0A1B0GVH5;Q9C0B1-4;Q9C0B1-2	1;1;1;1;1;1;1;1;1;1;1;1;1	1;1;1;1;1;1;1;1;1;1;1;1;1	1;1;1;1;1;1;1;1;1;1;1;1;1	Alpha-ketoglutarate-dependent dioxygenase FTO	FTO	sp|Q9C0B1|FTO_HUMAN Alpha-ketoglutarate-dependent dioxygenase FTO OS=Homo sapiens OX=9606 GN=FTO PE=1 SV=3;tr|A0A1B0GTZ8|A0A1B0GTZ8_HUMAN Alpha-ketoglutarate-dependent dioxygenase FTO (Fragment) OS=Homo sapiens OX=9606 GN=FTO PE=1 SV=1;tr|X6R3I0|X6R3I0_HUM	13	1	1	1	0	0	0	0	0	0	0	0	1	0	0	0	0	0	0	0	0	0	0	0	1	0	0	0	0	0	0	0	0	0	0	0	1	0	0	0	2.8
337	P49419;A0A1B0GW77;A0A1B0GTG2;A0A1B0GW82;P49419-2;A0A1B0GUA1;A0A1B0GTY9;A0A1B0GTJ4;A0A1B0GV49;P49419-4;A0A0J9YWF7;H0YHM6;A0A1B0GUY0;F8WDY6;F8VVF2;A0A1B0GVU0;F8WD33;A0A1B0GW65;A0A0J9YWM6;A0A0J9YWK1	P49419;A0A1B0GW77;A0A1B0GTG2;A0A1B0GW82;P49419-2;A0A1B0GUA1;A0A1B0GTY9;A0A1B0GTJ4;A0A1B0GV49;P49419-4;A0A0J9YWF7	15;15;15;14;14;14;14;12;12;11;9;7;6;5;4;2;2;2;1;1	15;15;15;14;14;14;14;12;12;11;9;7;6;5;4;2;2;2;1;1	15;15;15;14;14;14;14;12;12;11;9;7;6;5;4;2;2;2;1;1	Alpha-aminoadipic semialdehyde dehydrogenase	ALDH7A1	sp|P49419|AL7A1_HUMAN Alpha-aminoadipic semialdehyde dehydrogenase OS=Homo sapiens OX=9606 GN=ALDH7A1 PE=1 SV=5;tr|A0A1B0GW77|A0A1B0GW77_HUMAN Alpha-aminoadipic semialdehyde dehydrogenase OS=Homo sapiens OX=9606 GN=ALDH7A1 PE=1 SV=1;tr|A0A1B0GTG2|A0A1B0GTG	20	15	15	15	10	0	0	0	1	0	11	0	4	0	2	0	10	0	0	0	1	0	11	0	4	0	2	0	10	0	0	0	1	0	11	0	4	0	2	0	37.8
338	Q9BXF6;A0A1B0GTL5	Q9BXF6;A0A1B0GTL5	1;1	1;1	1;1	Rab11 family-interacting protein 5	RAB11FIP5	sp|Q9BXF6|RFIP5_HUMAN Rab11 family-interacting protein 5 OS=Homo sapiens OX=9606 GN=RAB11FIP5 PE=1 SV=1;tr|A0A1B0GTL5|A0A1B0GTL5_HUMAN Rab11 family-interacting protein 5 OS=Homo sapiens OX=9606 GN=RAB11FIP5 PE=1 SV=1	2	1	1	1	0	0	1	0	0	0	0	0	0	0	0	0	0	0	1	0	0	0	0	0	0	0	0	0	0	0	1	0	0	0	0	0	0	0	0	0	2.9
339	H0Y488;A0A1B0GTU5;O14497-3;A0A087WUV6;H0YCU6;H0YEW5;E9PQW6;A0A1B0GVT5	H0Y488;A0A1B0GTU5;O14497-3	84;84;83;37;6;4;1;1	1;1;0;0;0;0;0;0	1;1;0;0;0;0;0;0	AT-rich interactive domain-containing protein 1A	ARID1A	tr|H0Y488|H0Y488_HUMAN AT-rich interactive domain-containing protein 1A OS=Homo sapiens OX=9606 GN=ARID1A PE=1 SV=2;tr|A0A1B0GTU5|A0A1B0GTU5_HUMAN AT-rich interactive domain-containing protein 1A (Fragment) OS=Homo sapiens OX=9606 GN=ARID1A PE=1 SV=1;sp|O1	8	84	1	1	0	3	0	2	1	2	10	75	0	64	4	75	0	0	0	0	0	0	0	0	0	0	0	1	0	0	0	0	0	0	0	0	0	0	0	1	66.8
340	A0A1B0GTX1;A0A1C7CYY6;Q6XZF7-2	A0A1B0GTX1;A0A1C7CYY6;Q6XZF7-2	17;13;13	4;0;0	4;0;0	Dynamin-binding protein	DNMBP	tr|A0A1B0GTX1|A0A1B0GTX1_HUMAN Dynamin-binding protein OS=Homo sapiens OX=9606 GN=DNMBP PE=1 SV=1;tr|A0A1C7CYY6|A0A1C7CYY6_HUMAN Dynamin-binding protein OS=Homo sapiens OX=9606 GN=DNMBP PE=1 SV=1;sp|Q6XZF7-2|DNMBP_HUMAN Isoform 2 of Dynamin-binding protein	3	17	4	4	2	0	1	0	17	0	0	0	0	0	0	0	0	0	0	0	4	0	0	0	0	0	0	0	0	0	0	0	4	0	0	0	0	0	0	0	22.7
341	Q96EK5;A0A1B0GUA3;A0A1B0GUH6	Q96EK5;A0A1B0GUA3;A0A1B0GUH6	2;2;1	2;2;1	2;2;1	KIF1-binding protein	KIAA1279	sp|Q96EK5|KBP_HUMAN KIF-binding protein OS=Homo sapiens OX=9606 GN=KIFBP PE=1 SV=1;tr|A0A1B0GUA3|A0A1B0GUA3_HUMAN KIF-binding protein OS=Homo sapiens OX=9606 GN=KIFBP PE=1 SV=1;tr|A0A1B0GUH6|A0A1B0GUH6_HUMAN KIF-binding protein (Fragment) OS=Homo sapiens O	3	2	2	2	0	0	0	0	0	0	0	0	2	0	0	0	0	0	0	0	0	0	0	0	2	0	0	0	0	0	0	0	0	0	0	0	2	0	0	0	5.5
342	Q9BRB3-2;B8ZZ29;A0A1B0GUF6;J3QTH6;B8ZZ31;E7ERP4;Q9BRB3-3;Q9BRB3	Q9BRB3-2;B8ZZ29;A0A1B0GUF6;J3QTH6;B8ZZ31;E7ERP4;Q9BRB3-3;Q9BRB3	1;1;1;1;1;1;1;1	1;1;1;1;1;1;1;1	1;1;1;1;1;1;1;1	Phosphatidylinositol N-acetylglucosaminyltransferase subunit Q	PIGQ	sp|Q9BRB3-2|PIGQ_HUMAN Isoform 2 of Phosphatidylinositol N-acetylglucosaminyltransferase subunit Q OS=Homo sapiens OX=9606 GN=PIGQ;tr|B8ZZ29|B8ZZ29_HUMAN Phosphatidylinositol N-acetylglucosaminyltransferase subunit Q (Fragment) OS=Homo sapiens OX=9606 GN=P	8	1	1	1	0	0	0	0	0	0	0	0	1	0	0	0	0	0	0	0	0	0	0	0	1	0	0	0	0	0	0	0	0	0	0	0	1	0	0	0	2.8
343	O14795;B1AM27;A0A1B0GUS7;O14795-2;A0A1B0GVW8;I6L9J0;F8W8M9;A0A0U1RRL2;Q9UPW8;F8VZH8;F8W0P6;F8W059;A0A0U1RRB5	O14795;B1AM27;A0A1B0GUS7;O14795-2;A0A1B0GVW8;I6L9J0;F8W8M9	16;16;16;16;12;11;11;4;3;3;3;3;1	16;16;16;16;12;11;11;4;3;3;3;3;1	14;14;14;14;10;9;9;4;1;1;1;1;1	Protein unc-13 homolog B	UNC13B	sp|O14795|UN13B_HUMAN Protein unc-13 homolog B OS=Homo sapiens OX=9606 GN=UNC13B PE=1 SV=2;tr|B1AM27|B1AM27_HUMAN Protein unc-13 homolog B OS=Homo sapiens OX=9606 GN=UNC13B PE=1 SV=1;tr|A0A1B0GUS7|A0A1B0GUS7_HUMAN Protein unc-13 homolog B OS=Homo sapiens O	13	16	16	14	0	0	1	0	10	0	0	0	2	0	12	0	0	0	1	0	10	0	0	0	2	0	12	0	0	0	1	0	8	0	0	0	1	0	11	0	13.8
344	Q14156;A0A1B0GUZ7;Q14156-3;Q14156-2	Q14156;A0A1B0GUZ7;Q14156-3;Q14156-2	2;2;2;2	2;2;2;2	2;2;2;2	Protein EFR3 homolog A	EFR3A	sp|Q14156|EFR3A_HUMAN Protein EFR3 homolog A OS=Homo sapiens OX=9606 GN=EFR3A PE=1 SV=2;tr|A0A1B0GUZ7|A0A1B0GUZ7_HUMAN Protein EFR3 homolog A OS=Homo sapiens OX=9606 GN=EFR3A PE=1 SV=1;sp|Q14156-3|EFR3A_HUMAN Isoform 3 of Protein EFR3 homolog A OS=Homo sap	4	2	2	2	0	1	1	1	0	0	0	0	0	0	0	0	0	1	1	1	0	0	0	0	0	0	0	0	0	1	1	1	0	0	0	0	0	0	0	0	4.6
345	P07339;A0A1B0GW44;A0A1B0GV23;A0A1B0GVD5;A0A1B0GWE8;H7C469;A0A1B0GU92;A0A1B0GU03;A0A1B0GVP3;F8WD96;C9JH19;H7C1V0;F8W787;A0A1B0GVF1	P07339;A0A1B0GW44;A0A1B0GV23;A0A1B0GVD5;A0A1B0GWE8;H7C469;A0A1B0GU92;A0A1B0GU03;A0A1B0GVP3;F8WD96;C9JH19	9;9;9;9;9;8;8;8;7;5;5;4;3;1	9;9;9;9;9;8;8;8;7;5;5;4;3;1	9;9;9;9;9;8;8;8;7;5;5;4;3;1	Cathepsin D;Cathepsin D light chain;Cathepsin D heavy chain	CTSD	sp|P07339|CATD_HUMAN Cathepsin D OS=Homo sapiens OX=9606 GN=CTSD PE=1 SV=1;tr|A0A1B0GW44|A0A1B0GW44_HUMAN Cathepsin D OS=Homo sapiens OX=9606 GN=CTSD PE=1 SV=1;tr|A0A1B0GV23|A0A1B0GV23_HUMAN Cathepsin D OS=Homo sapiens OX=9606 GN=CTSD PE=1 SV=1;tr|A0A1B0GV	14	9	9	9	2	0	2	0	0	1	3	0	9	0	1	0	2	0	2	0	0	1	3	0	9	0	1	0	2	0	2	0	0	1	3	0	9	0	1	0	28.4
346	Q7Z4S6;Q7Z4S6-2;A0A1B0GV47;Q7Z4S6-3;Q7Z4S6-6;Q7Z4S6-5;Q7Z4S6-4;H0YHT2;H0YIM7;H0YIM6;O75037-4;O75037-3;O75037-2;O75037;H0YHG9;Q86VH2-3;Q86VH2-2;Q86VH2	Q7Z4S6;Q7Z4S6-2;A0A1B0GV47;Q7Z4S6-3;Q7Z4S6-6;Q7Z4S6-5;Q7Z4S6-4;H0YHT2	39;39;39;39;39;39;39;20;11;9;4;4;4;4;2;1;1;1	39;39;39;39;39;39;39;20;11;9;4;4;4;4;2;1;1;1	25;25;25;25;25;25;25;7;10;6;3;3;3;3;0;0;0;0	Kinesin-like protein KIF21A	KIF21A	sp|Q7Z4S6|KI21A_HUMAN Kinesin-like protein KIF21A OS=Homo sapiens OX=9606 GN=KIF21A PE=1 SV=2;sp|Q7Z4S6-2|KI21A_HUMAN Isoform 2 of Kinesin-like protein KIF21A OS=Homo sapiens OX=9606 GN=KIF21A;tr|A0A1B0GV47|A0A1B0GV47_HUMAN Kinesin-like protein KIF21A (Fra	18	39	39	25	0	0	34	2	0	0	0	0	23	4	3	0	0	0	34	2	0	0	0	0	23	4	3	0	0	0	22	1	0	0	0	0	12	2	1	0	40.4
347	Q96N21;Q96N21-2;A0A1B0GV70	Q96N21;Q96N21-2;A0A1B0GV70	1;1;1	1;1;1	1;1;1	AP-4 complex accessory subunit tepsin	ENTHD2	sp|Q96N21|AP4AT_HUMAN AP-4 complex accessory subunit Tepsin OS=Homo sapiens OX=9606 GN=TEPSIN PE=1 SV=1;sp|Q96N21-2|AP4AT_HUMAN Isoform 2 of AP-4 complex accessory subunit Tepsin OS=Homo sapiens OX=9606 GN=TEPSIN;tr|A0A1B0GV70|A0A1B0GV70_HUMAN AP-4 complex	3	1	1	1	0	0	1	0	0	0	1	0	0	0	0	0	0	0	1	0	0	0	1	0	0	0	0	0	0	0	1	0	0	0	1	0	0	0	0	0	3.2
348	A0A1B0GVD1	A0A1B0GVD1	1	1	1			sp|A0A1B0GVD1|F237B_HUMAN Protein FAM237B OS=Homo sapiens OX=9606 GN=FAM237B PE=3 SV=1	1	1	1	1	0	0	1	0	0	0	0	0	0	0	0	0	0	0	1	0	0	0	0	0	0	0	0	0	0	0	1	0	0	0	0	0	0	0	0	0	12.2
349	Q05086;Q05086-2;Q05086-3;A0A1B0GVL3;A0A0D9SG63;S4R306;A0A0D9SG77	Q05086;Q05086-2;Q05086-3;A0A1B0GVL3;A0A0D9SG63;S4R306;A0A0D9SG77	2;2;2;2;1;1;1	2;2;2;2;1;1;1	2;2;2;2;1;1;1	Ubiquitin-protein ligase E3A	UBE3A	sp|Q05086|UBE3A_HUMAN Ubiquitin-protein ligase E3A OS=Homo sapiens OX=9606 GN=UBE3A PE=1 SV=4;sp|Q05086-2|UBE3A_HUMAN Isoform I of Ubiquitin-protein ligase E3A OS=Homo sapiens OX=9606 GN=UBE3A;sp|Q05086-3|UBE3A_HUMAN Isoform III of Ubiquitin-protein ligase	7	2	2	2	0	0	0	0	0	0	0	0	0	0	2	0	0	0	0	0	0	0	0	0	0	0	2	0	0	0	0	0	0	0	0	0	0	0	2	0	2.3
350	A0A1B0GVL4;P78312;P78312-2;D6RFZ4;E7EUR8;P78312-3;P78312-4;P78312-6;P78312-5	A0A1B0GVL4;P78312;P78312-2;D6RFZ4;E7EUR8;P78312-3;P78312-4;P78312-6;P78312-5	2;1;1;1;1;1;1;1;1	2;1;1;1;1;1;1;1;1	2;1;1;1;1;1;1;1;1	Protein FAM193A	FAM193A	tr|A0A1B0GVL4|A0A1B0GVL4_HUMAN Protein FAM193A OS=Homo sapiens OX=9606 GN=FAM193A PE=1 SV=1;sp|P78312|F193A_HUMAN Protein FAM193A OS=Homo sapiens OX=9606 GN=FAM193A PE=1 SV=2;sp|P78312-2|F193A_HUMAN Isoform 2 of Protein FAM193A OS=Homo sapiens OX=9606 GN=F	9	2	2	2	0	0	0	0	0	0	0	0	2	0	0	0	0	0	0	0	0	0	0	0	2	0	0	0	0	0	0	0	0	0	0	0	2	0	0	0	2.3
351	A0A1B0GW03	A0A1B0GW03	8	6	6			tr|A0A1B0GW03|A0A1B0GW03_HUMAN Pleckstrin homology domain-containing family A member 6 (Fragment) OS=Homo sapiens OX=9606 GN=PLEKHA6 PE=1 SV=2	1	8	6	6	0	7	1	7	0	8	0	3	0	3	1	6	0	5	1	5	0	6	0	2	0	3	1	4	0	5	1	5	0	6	0	2	0	3	1	4	73.9
352	Q2PZI1;A0A1B0GW05;Q6NUT2;H7C3M5;F5H1L7;Q2PZI1-2	Q2PZI1;A0A1B0GW05	9;9;2;2;1;1	9;9;2;2;1;1	7;7;1;2;1;1	Probable C-mannosyltransferase DPY19L1	DPY19L1	sp|Q2PZI1|D19L1_HUMAN Probable C-mannosyltransferase DPY19L1 OS=Homo sapiens OX=9606 GN=DPY19L1 PE=2 SV=1;tr|A0A1B0GW05|A0A1B0GW05_HUMAN Probable C-mannosyltransferase DPY19L1 OS=Homo sapiens OX=9606 GN=DPY19L1 PE=1 SV=1	6	9	9	7	0	0	5	0	0	0	0	0	8	0	0	0	0	0	5	0	0	0	0	0	8	0	0	0	0	0	4	0	0	0	0	0	6	0	0	0	17.8
353	A0A1B0GWJ2	A0A1B0GWJ2	78	1	1			tr|A0A1B0GWJ2|A0A1B0GWJ2_HUMAN AT-rich interactive domain-containing protein 1B OS=Homo sapiens OX=9606 GN=ARID1B PE=1 SV=1	1	78	1	1	8	68	0	64	8	65	3	65	0	47	1	63	0	0	0	0	0	1	0	0	0	0	0	0	0	0	0	0	0	1	0	0	0	0	0	0	66.6
354	A0A1C7CYX1;Q6PJG2;A0A0A0MSU2;H7C1L3;C9JYU7	A0A1C7CYX1;Q6PJG2;A0A0A0MSU2	35;33;33;11;2	35;33;33;11;2	35;33;33;11;2	ELM2 and SANT domain-containing protein 1	ELMSAN1	tr|A0A1C7CYX1|A0A1C7CYX1_HUMAN Mitotic deacetylase-associated SANT domain protein OS=Homo sapiens OX=9606 GN=MIDEAS PE=1 SV=1;sp|Q6PJG2|MDEAS_HUMAN Mitotic deacetylase-associated SANT domain protein OS=Homo sapiens OX=9606 GN=MIDEAS PE=1 SV=2;tr|A0A0A0MSU2	5	35	35	35	0	9	0	9	0	15	1	21	0	14	0	30	0	9	0	9	0	15	1	21	0	14	0	30	0	9	0	9	0	15	1	21	0	14	0	30	49.4
355	Q9BWM7;A0A1P0AYU5;S4R3N9	Q9BWM7;A0A1P0AYU5;S4R3N9	9;9;5	8;8;5	8;8;5	Sideroflexin-3	SFXN3	sp|Q9BWM7|SFXN3_HUMAN Sideroflexin-3 OS=Homo sapiens OX=9606 GN=SFXN3 PE=1 SV=3;tr|A0A1P0AYU5|A0A1P0AYU5_HUMAN Sidoreflexin OS=Homo sapiens OX=9606 GN=SFXN3 PE=1 SV=1;tr|S4R3N9|S4R3N9_HUMAN Sideroflexin-3 OS=Homo sapiens OX=9606 GN=SFXN3 PE=1 SV=1	3	9	8	8	0	0	6	1	0	0	0	0	7	0	1	0	0	0	5	1	0	0	0	0	6	0	1	0	0	0	5	1	0	0	0	0	6	0	1	0	41.1
356	Q9Y2D2;A0A1W2PR66;A0A1W2PQ13;A0A1W2PQ60;A0A1W2PNY6;A0A1W2PPH4;A0A1W2PPG9;A0A1W2PPE6;A0A1W2PQD6;A0A1W2PQH2;A0A1W2PRT7;A0A1W2PSD1;A0A1W2PS45;A0A1W2PRN3;A0A1W2PS77;A0A1W2PQL8;A0A1W2PSA9;Q9Y2D2-2;A0A1W2PNF0;Q9Y2D2-3	Q9Y2D2;A0A1W2PR66;A0A1W2PQ13;A0A1W2PQ60;A0A1W2PNY6;A0A1W2PPH4;A0A1W2PPG9;A0A1W2PPE6;A0A1W2PQD6;A0A1W2PQH2;A0A1W2PRT7;A0A1W2PSD1;A0A1W2PS45;A0A1W2PRN3;A0A1W2PS77;A0A1W2PQL8;A0A1W2PSA9;Q9Y2D2-2;A0A1W2PNF0;Q9Y2D2-3	1;1;1;1;1;1;1;1;1;1;1;1;1;1;1;1;1;1;1;1	1;1;1;1;1;1;1;1;1;1;1;1;1;1;1;1;1;1;1;1	1;1;1;1;1;1;1;1;1;1;1;1;1;1;1;1;1;1;1;1	UDP-N-acetylglucosamine transporter	SLC35A3	sp|Q9Y2D2|S35A3_HUMAN UDP-N-acetylglucosamine transporter OS=Homo sapiens OX=9606 GN=SLC35A3 PE=1 SV=1;tr|A0A1W2PR66|A0A1W2PR66_HUMAN UDP-N-acetylglucosamine transporter OS=Homo sapiens OX=9606 GN=SLC35A3 PE=1 SV=1;tr|A0A1W2PQ13|A0A1W2PQ13_HUMAN Uncharacte	20	1	1	1	0	0	1	0	0	0	0	0	0	0	0	0	0	0	1	0	0	0	0	0	0	0	0	0	0	0	1	0	0	0	0	0	0	0	0	0	4.6
357	O95427;A0A1W2PQ49;A0A1W2PS19;A0A1W2PNH8;A0A1W2PNR0;A0A1W2PQP4;A0A1W2PQR8;A0A1W2PNQ8;A0A1W2PQZ1;A0A1W2PPR7;K7EID9;A0A1W2PNW5;K7ELE1;K7EMD7;K7EPJ2;A0A1W2PRH3;K7EL34;K7ESH9;A0A1W2PQA9;A0A1W2PPB6	O95427;A0A1W2PQ49;A0A1W2PS19;A0A1W2PNH8;A0A1W2PNR0;A0A1W2PQP4;A0A1W2PQR8;A0A1W2PNQ8;A0A1W2PQZ1;A0A1W2PPR7;K7EID9;A0A1W2PNW5;K7ELE1;K7EMD7;K7EPJ2;A0A1W2PRH3;K7EL34;K7ESH9;A0A1W2PQA9;A0A1W2PPB6	1;1;1;1;1;1;1;1;1;1;1;1;1;1;1;1;1;1;1;1	1;1;1;1;1;1;1;1;1;1;1;1;1;1;1;1;1;1;1;1	1;1;1;1;1;1;1;1;1;1;1;1;1;1;1;1;1;1;1;1	GPI ethanolamine phosphate transferase 1	PIGN	sp|O95427|PIGN_HUMAN GPI ethanolamine phosphate transferase 1 OS=Homo sapiens OX=9606 GN=PIGN PE=1 SV=1;tr|A0A1W2PQ49|A0A1W2PQ49_HUMAN GPI ethanolamine phosphate transferase 1 OS=Homo sapiens OX=9606 GN=PIGN PE=1 SV=1;tr|A0A1W2PS19|A0A1W2PS19_HUMAN GPI eth	20	1	1	1	0	0	1	0	0	0	0	0	0	0	0	0	0	0	1	0	0	0	0	0	0	0	0	0	0	0	1	0	0	0	0	0	0	0	0	0	1.7
358	Q969N2;A0A1W2PNP0;A0A1W2PPC3;A0A1W2PPS0;Q969N2-5;A0A1W2PP57;Q969N2-4;A0A1W2PP53;A0A1W2PPR6;A0A1W2PQN1;A0A1W2PPQ7;Q969N2-2;A0A1W2PRZ8;Q969N2-6;A0A1W2PR92;A0A1W2PQ52;A0A1W2PP13;A0A1W2PQY1;Q969N2-3;A0A1W2PRH2;H7C2Y2;A0A1W2PPK4;A0A1W2PQ29;A0A1W2PPI8;A0A1W2PRV7;A0A1W2PNW9;A0A1W2PRG1;A0A1W2PSC5;A0A1W2PNZ5;A0A1W2PR22;A0A1W2PP03;A0A1W2PRH8;A0A1W2PQL3;A0A1W2PP98;A0A1W2PNS2;A0A1W2PPU8;B7Z7C5;A0A1W2PQA4;A0A…	Q969N2;A0A1W2PNP0;A0A1W2PPC3;A0A1W2PPS0;Q969N2-5;A0A1W2PP57;Q969N2-4;A0A1W2PP53;A0A1W2PPR6;A0A1W2PQN1;A0A1W2PPQ7;Q969N2-2;A0A1W2PRZ8;Q969N2-6;A0A1W2PR92;A0A1W2PQ52;A0A1W2PP13;A0A1W2PQY1	15;15;15;15;15;15;14;13;12;12;11;11;10;10;10;9;8;8;7;7;7;7;7;7;6;5;5;4;3;3;3;3;3;3;3;3;3;2;2;2;2;2;2;1;1	15;15;15;15;15;15;14;13;12;12;11;11;10;10;10;9;8;8;7;7;7;7;7;7;6;5;5;4;3;3;3;3;3;3;3;3;3;2;2;2;2;2;2;1;1	15;15;15;15;15;15;14;13;12;12;11;11;10;10;10;9;8;8;7;7;7;7;7;7;6;5;5;4;3;3;3;3;3;3;3;3;3;2;2;2;2;2;2;1;1	GPI transamidase component PIG-T	PIGT	sp|Q969N2|PIGT_HUMAN GPI transamidase component PIG-T OS=Homo sapiens OX=9606 GN=PIGT PE=1 SV=1;tr|A0A1W2PNP0|A0A1W2PNP0_HUMAN GPI transamidase component PIG-T (Fragment) OS=Homo sapiens OX=9606 GN=PIGT PE=1 SV=1;tr|A0A1W2PPC3|A0A1W2PPC3_HUMAN GPI transami	45	15	15	15	0	0	13	0	0	0	0	0	9	0	0	0	0	0	13	0	0	0	0	0	9	0	0	0	0	0	13	0	0	0	0	0	9	0	0	0	38.2
359	Q9Y5U9;A0A1W2PNR9	Q9Y5U9;A0A1W2PNR9	2;2	2;2	2;2	Immediate early response 3-interacting protein 1	IER3IP1	sp|Q9Y5U9|IR3IP_HUMAN Immediate early response 3-interacting protein 1 OS=Homo sapiens OX=9606 GN=IER3IP1 PE=1 SV=1;tr|A0A1W2PNR9|A0A1W2PNR9_HUMAN Immediate early response 3-interacting protein 1 OS=Homo sapiens OX=9606 GN=IER3IP1 PE=1 SV=1	2	2	2	2	1	0	1	0	0	0	0	0	0	0	0	0	1	0	1	0	0	0	0	0	0	0	0	0	1	0	1	0	0	0	0	0	0	0	0	0	34.1
360	P26367;P26367-2;A0A1W2PQA8;E9PKM0;A0A1W2PPN2;A0A1W2PSA8;D1KF47;A0A1W2PS91;A0A1W2PQM7;A0A1W2PRA4;A0A1W2PQL7;A0A1W2PRG3;B1B1I9;A0A1W2PRS6;A0A1W2PSB5;A0A1X7SBT0;A0A1W2PRW7;A0A1W2PRH6;A0A1W2PRA8;A0A1W2PPH0;A0A1W2PPJ2;A0A1W2PNS7;A0A1W2PQ31;A0A1W2PRU4;A0A1W2PQJ8;A0A1W2PP27;A0A1W2PP89;A0A1W2PPG3;A0A1W2PQG3;A0A1W2PQG7;B1B1I8;A0A1W2PPM5	P26367;P26367-2;A0A1W2PQA8;E9PKM0;A0A1W2PPN2;A0A1W2PSA8;D1KF47;A0A1W2PS91;A0A1W2PQM7;A0A1W2PRA4;A0A1W2PQL7;A0A1W2PRG3;B1B1I9;A0A1W2PRS6;A0A1W2PSB5;A0A1X7SBT0;A0A1W2PRW7;A0A1W2PRH6;A0A1W2PRA8;A0A1W2PPH0;A0A1W2PPJ2;A0A1W2PNS7;A0A1W2PQ31;A0A1W2PRU4;A0A1W2PQJ8;A0A1W2PP27;A0A1W2PP89;A0A1W2PPG3;A0A1W2PQG3;A0A1W2PQG7;B1B1I8;A0A1W2PPM5	1;1;1;1;1;1;1;1;1;1;1;1;1;1;1;1;1;1;1;1;1;1;1;1;1;1;1;1;1;1;1;1	1;1;1;1;1;1;1;1;1;1;1;1;1;1;1;1;1;1;1;1;1;1;1;1;1;1;1;1;1;1;1;1	1;1;1;1;1;1;1;1;1;1;1;1;1;1;1;1;1;1;1;1;1;1;1;1;1;1;1;1;1;1;1;1	Paired box protein Pax-6	PAX6	sp|P26367|PAX6_HUMAN Paired box protein Pax-6 OS=Homo sapiens OX=9606 GN=PAX6 PE=1 SV=2;sp|P26367-2|PAX6_HUMAN Isoform 5a of Paired box protein Pax-6 OS=Homo sapiens OX=9606 GN=PAX6;tr|A0A1W2PQA8|A0A1W2PQA8_HUMAN Paired box protein Pax-6 (Fragment) OS=Homo	32	1	1	1	0	0	0	0	0	0	0	1	0	0	0	0	0	0	0	0	0	0	0	1	0	0	0	0	0	0	0	0	0	0	0	1	0	0	0	0	4
361	O14653;I3L4Z6;E7EQ34;A0A1W2PS81;O14653-2;I3NI02;A0A1W2PQM3;A0A1W2PQP2;A0A1W2PRC2;A0A1W2PPP5;A0A1W2PPG1;A0A1W2PPG5;A0A1W2PRL0;A0A1W2PNV3;A0A1W2PS12;A0A1X7SBU8;I3L0K1;A0A1W2PRP7;A0A1W2PRV0;A0A1W2PRE6;A0A1W2PQS3;A0A1W2PQ77;A0A1W2PPW8;A0A1W2PPJ0;A0A1W2PQE0;A0A1W2PR23;A0A1W2PR02;A0A1W2PQ38;O14653-3;A0A1W2PQ12;I3L1K7;A0A1W2PQ06;A0A1W2PRD0;A0A1W2PQQ4;A0A1W2PP28	O14653;I3L4Z6;E7EQ34;A0A1W2PS81;O14653-2;I3NI02;A0A1W2PQM3;A0A1W2PQP2;A0A1W2PRC2;A0A1W2PPP5;A0A1W2PPG1;A0A1W2PPG5;A0A1W2PRL0;A0A1W2PNV3;A0A1W2PS12;A0A1X7SBU8;I3L0K1;A0A1W2PRP7;A0A1W2PRV0;A0A1W2PRE6;A0A1W2PQS3;A0A1W2PQ77;A0A1W2PPW8;A0A1W2PPJ0;A0A1W2PQE0;A0A1W2PR23;A0A1W2PR02;A0A1W2PQ38;O14653-3	3;3;3;3;3;3;3;3;3;3;3;3;3;3;3;2;2;2;2;2;2;2;2;2;2;2;2;2;2;1;1;1;1;1;1	3;3;3;3;3;3;3;3;3;3;3;3;3;3;3;2;2;2;2;2;2;2;2;2;2;2;2;2;2;1;1;1;1;1;1	3;3;3;3;3;3;3;3;3;3;3;3;3;3;3;2;2;2;2;2;2;2;2;2;2;2;2;2;2;1;1;1;1;1;1	Golgi SNAP receptor complex member 2	GOSR2	sp|O14653|GOSR2_HUMAN Golgi SNAP receptor complex member 2 OS=Homo sapiens OX=9606 GN=GOSR2 PE=1 SV=2;tr|I3L4Z6|I3L4Z6_HUMAN Golgi SNAP receptor complex member 2 OS=Homo sapiens OX=9606 GN=GOSR2 PE=1 SV=2;tr|E7EQ34|E7EQ34_HUMAN Uncharacterized protein OS=H	35	3	3	3	1	0	3	0	0	0	0	0	0	0	0	0	1	0	3	0	0	0	0	0	0	0	0	0	1	0	3	0	0	0	0	0	0	0	0	0	22.2
362	Q9NVC6;A0A1W2PRX4;A0A1W2PNW7;A0A1W2PRB8	Q9NVC6;A0A1W2PRX4;A0A1W2PNW7;A0A1W2PRB8	1;1;1;1	1;1;1;1	1;1;1;1	Mediator of RNA polymerase II transcription subunit 17	MED17	sp|Q9NVC6|MED17_HUMAN Mediator of RNA polymerase II transcription subunit 17 OS=Homo sapiens OX=9606 GN=MED17 PE=1 SV=2;tr|A0A1W2PRX4|A0A1W2PRX4_HUMAN Cofactor required for Sp1 transcriptional activation subunit 6 (Fragment) OS=Homo sapiens OX=9606 GN=MED1	4	1	1	1	0	1	0	0	0	1	0	0	0	0	0	1	0	1	0	0	0	1	0	0	0	0	0	1	0	1	0	0	0	1	0	0	0	0	0	1	4.9
363	Q9H300;A0A1W2PP11;Q9H300-2;F8WCQ4;A0A1W2PS40;C9JNP8;H7C0U0;H7C122;A0A1W2PP66	Q9H300;A0A1W2PP11;Q9H300-2;F8WCQ4;A0A1W2PS40;C9JNP8;H7C0U0	5;5;5;4;4;4;3;1;1	5;5;5;4;4;4;3;1;1	5;5;5;4;4;4;3;1;1	Presenilins-associated rhomboid-like protein, mitochondrial;P-beta	PARL	sp|Q9H300|PARL_HUMAN Presenilins-associated rhomboid-like protein, mitochondrial OS=Homo sapiens OX=9606 GN=PARL PE=1 SV=2;tr|A0A1W2PP11|A0A1W2PP11_HUMAN Presenilins-associated rhomboid-like protein, mitochondrial OS=Homo sapiens OX=9606 GN=PARL PE=4 SV=1;	9	5	5	5	0	0	5	0	0	0	0	0	0	0	0	0	0	0	5	0	0	0	0	0	0	0	0	0	0	0	5	0	0	0	0	0	0	0	0	0	18.7
364	Q9H3H5;A0A1W2PQH0;A0A1W2PPC6;Q9H3H5-3;Q9H3H5-2	Q9H3H5;A0A1W2PQH0;A0A1W2PPC6;Q9H3H5-3;Q9H3H5-2	1;1;1;1;1	1;1;1;1;1	1;1;1;1;1	UDP-N-acetylglucosamine--dolichyl-phosphate N-acetylglucosaminephosphotransferase	DPAGT1	sp|Q9H3H5|GPT_HUMAN UDP-N-acetylglucosamine--dolichyl-phosphate N-acetylglucosaminephosphotransferase OS=Homo sapiens OX=9606 GN=DPAGT1 PE=1 SV=2;tr|A0A1W2PQH0|A0A1W2PQH0_HUMAN GlcNAc-1-P transferase (Fragment) OS=Homo sapiens OX=9606 GN=DPAGT1 PE=1 SV=1;t	5	1	1	1	0	0	1	0	1	0	0	0	1	0	0	0	0	0	1	0	1	0	0	0	1	0	0	0	0	0	1	0	1	0	0	0	1	0	0	0	2.7
365	O75382;A0A1W2PPI7;O75382-2;O75382-4;O75382-3;E9PMK8;E9PMW5	O75382;A0A1W2PPI7;O75382-2;O75382-4;O75382-3;E9PMK8	6;6;6;5;4;3;1	6;6;6;5;4;3;1	6;6;6;5;4;3;1	Tripartite motif-containing protein 3	TRIM3	sp|O75382|TRIM3_HUMAN Tripartite motif-containing protein 3 OS=Homo sapiens OX=9606 GN=TRIM3 PE=1 SV=2;tr|A0A1W2PPI7|A0A1W2PPI7_HUMAN Tripartite motif-containing protein 3 OS=Homo sapiens OX=9606 GN=TRIM3 PE=1 SV=1;sp|O75382-2|TRIM3_HUMAN Isoform Beta of T	7	6	6	6	1	0	3	0	0	0	0	0	3	0	0	0	1	0	3	0	0	0	0	0	3	0	0	0	1	0	3	0	0	0	0	0	3	0	0	0	12.8
366	Q86VV8;J3KT00;A0A1W2PPP3;Q86VV8-4;Q86VV8-3;J3KTD2;A0A1W2PQI7;Q86VV8-2	Q86VV8;J3KT00;A0A1W2PPP3;Q86VV8-4;Q86VV8-3;J3KTD2;A0A1W2PQI7;Q86VV8-2	2;2;2;2;2;1;1;1	2;2;2;2;2;1;1;1	2;2;2;2;2;1;1;1	Rotatin	RTTN	sp|Q86VV8|RTTN_HUMAN Rotatin OS=Homo sapiens OX=9606 GN=RTTN PE=1 SV=3;tr|J3KT00|J3KT00_HUMAN Rotatin (Fragment) OS=Homo sapiens OX=9606 GN=RTTN PE=1 SV=1;tr|A0A1W2PPP3|A0A1W2PPP3_HUMAN Rotatin (Fragment) OS=Homo sapiens OX=9606 GN=RTTN PE=1 SV=1;sp|Q86VV8	8	2	2	2	0	0	0	0	0	0	0	0	1	0	2	0	0	0	0	0	0	0	0	0	1	0	2	0	0	0	0	0	0	0	0	0	1	0	2	0	1.5
367	Q9Y282;A0A1W2PPS8;H0Y621;H0Y5K5;Q9Y282-2;Q9Y282-3	Q9Y282;A0A1W2PPS8;H0Y621;H0Y5K5;Q9Y282-2;Q9Y282-3	1;1;1;1;1;1	1;1;1;1;1;1	1;1;1;1;1;1	Endoplasmic reticulum-Golgi intermediate compartment protein 3	ERGIC3	sp|Q9Y282|ERGI3_HUMAN Endoplasmic reticulum-Golgi intermediate compartment protein 3 OS=Homo sapiens OX=9606 GN=ERGIC3 PE=1 SV=1;tr|A0A1W2PPS8|A0A1W2PPS8_HUMAN Endoplasmic reticulum-Golgi intermediate compartment protein 3 OS=Homo sapiens OX=9606 GN=ERGIC3	6	1	1	1	0	0	1	0	0	0	0	0	0	0	0	0	0	0	1	0	0	0	0	0	0	0	0	0	0	0	1	0	0	0	0	0	0	0	0	0	3.7
368	Q5JU85;Q5JU85-3;A0A1W2PQ34;A0A1W2PPU7;A0A1W2PRJ5;A0A1W2PR28;A0A1W2PPE7	Q5JU85;Q5JU85-3;A0A1W2PQ34;A0A1W2PPU7;A0A1W2PRJ5;A0A1W2PR28;A0A1W2PPE7	2;2;2;2;2;2;1	2;2;2;2;2;2;1	2;2;2;2;2;2;1	IQ motif and SEC7 domain-containing protein 2	IQSEC2	sp|Q5JU85|IQEC2_HUMAN IQ motif and SEC7 domain-containing protein 2 OS=Homo sapiens OX=9606 GN=IQSEC2 PE=1 SV=2;sp|Q5JU85-3|IQEC2_HUMAN Isoform 2 of IQ motif and SEC7 domain-containing protein 2 OS=Homo sapiens OX=9606 GN=IQSEC2;tr|A0A1W2PQ34|A0A1W2PQ34_HU	7	2	2	2	0	0	0	0	0	0	1	0	0	0	1	0	0	0	0	0	0	0	1	0	0	0	1	0	0	0	0	0	0	0	1	0	0	0	1	0	1.2
369	P37268;E9PNM1;A0A1W2PQ47;P37268-3;P37268-2;E9PJG4;P37268-4;P37268-5;E9PS69	P37268;E9PNM1;A0A1W2PQ47;P37268-3;P37268-2;E9PJG4;P37268-4;P37268-5;E9PS69	6;6;6;5;5;4;4;4;3	6;6;6;5;5;4;4;4;3	6;6;6;5;5;4;4;4;3	Squalene synthase	FDFT1	sp|P37268|FDFT_HUMAN Squalene synthase OS=Homo sapiens OX=9606 GN=FDFT1 PE=1 SV=1;tr|E9PNM1|E9PNM1_HUMAN Squalene synthase OS=Homo sapiens OX=9606 GN=FDFT1 PE=1 SV=1;tr|A0A1W2PQ47|A0A1W2PQ47_HUMAN Squalene synthase OS=Homo sapiens OX=9606 GN=FDFT1 PE=1 SV=	9	6	6	6	0	0	4	0	0	0	0	0	3	0	0	0	0	0	4	0	0	0	0	0	3	0	0	0	0	0	4	0	0	0	0	0	3	0	0	0	20.6
370	Q92878;A0A1W2PQ90;Q92878-3;Q92878-2;A0A494C1B7;A0A494C0Y7;A0A494BZX5;A0A494C122;E7EN38;E7ESD9;H7C0P8;A0A494BZX8;H7C0V2	Q92878;A0A1W2PQ90;Q92878-3;Q92878-2;A0A494C1B7;A0A494C0Y7;A0A494BZX5;A0A494C122;E7EN38	14;14;14;14;12;7;7;7;7;6;2;2;1	14;14;14;14;12;7;7;7;7;6;2;2;1	14;14;14;14;12;7;7;7;7;6;2;2;1	DNA repair protein RAD50	RAD50	sp|Q92878|RAD50_HUMAN DNA repair protein RAD50 OS=Homo sapiens OX=9606 GN=RAD50 PE=1 SV=1;tr|A0A1W2PQ90|A0A1W2PQ90_HUMAN Zinc-hook domain-containing protein OS=Homo sapiens OX=9606 PE=3 SV=2;sp|Q92878-3|RAD50_HUMAN Isoform 3 of DNA repair protein RAD50 OS=	13	14	14	14	0	4	0	13	1	4	0	0	0	7	0	1	0	4	0	13	1	4	0	0	0	7	0	1	0	4	0	13	1	4	0	0	0	7	0	1	14.3
371	Q16875;Q16875-2;Q5VX20;Q5W015;A0A1W2PR17;F2Z2I2;Q16875-3;Q16875-4;H0Y483;A0A1W2PNV9;Q16877-3;Q16877-2;P16118-2;P16118;F6RAZ1;I1Z9G3;Q4VBA9;Q66S35;F6XNB3;Q16877	Q16875;Q16875-2;Q5VX20;Q5W015;A0A1W2PR17;F2Z2I2;Q16875-3;Q16875-4	11;11;11;11;11;11;10;10;3;3;1;1;1;1;1;1;1;1;1;1	11;11;11;11;11;11;10;10;3;3;1;1;1;1;1;1;1;1;1;1	8;8;8;8;8;8;7;7;2;2;0;0;0;0;0;0;0;0;0;0	6-phosphofructo-2-kinase/fructose-2,6-bisphosphatase 3;6-phosphofructo-2-kinase;Fructose-2,6-bisphosphatase	PFKFB3	sp|Q16875|F263_HUMAN 6-phosphofructo-2-kinase/fructose-2,6-bisphosphatase 3 OS=Homo sapiens OX=9606 GN=PFKFB3 PE=1 SV=1;sp|Q16875-2|F263_HUMAN Isoform 2 of 6-phosphofructo-2-kinase/fructose-2,6-bisphosphatase 3 OS=Homo sapiens OX=9606 GN=PFKFB3;tr|Q5VX20|Q	20	11	11	8	0	0	1	0	4	0	1	0	6	0	6	0	0	0	1	0	4	0	1	0	6	0	6	0	0	0	1	0	2	0	0	0	4	0	4	0	24
372	Q16637;A0A1W2PRV5;E7EQZ4;Q16637-4;Q16637-2;Q16637-3;A0A0G2JRX5;A0A0G2JRY6;A0A0G2JQN8;B4DP61;H0YBZ9	Q16637;A0A1W2PRV5;E7EQZ4;Q16637-4;Q16637-2;Q16637-3;A0A0G2JRX5;A0A0G2JRY6	8;8;8;8;8;8;4;4;3;3;1	8;8;8;8;8;8;4;4;3;3;1	8;8;8;8;8;8;4;4;3;3;1	Survival motor neuron protein	SMN1	sp|Q16637|SMN_HUMAN Survival motor neuron protein OS=Homo sapiens OX=9606 GN=SMN1 PE=1 SV=1;tr|A0A1W2PRV5|A0A1W2PRV5_HUMAN Survival motor neuron protein OS=Homo sapiens OX=9606 GN=SMN2 PE=1 SV=1;tr|E7EQZ4|E7EQZ4_HUMAN Survival motor neuron protein OS=Homo	11	8	8	8	0	4	6	4	4	3	0	1	3	1	2	1	0	4	6	4	4	3	0	1	3	1	2	1	0	4	6	4	4	3	0	1	3	1	2	1	35.4
373	P28715;A0A494C0S2;A0A1W2PS85;R4GMW8;A0A090HNM7;A0A494C113;P28715-3	P28715;A0A494C0S2;A0A1W2PS85;R4GMW8;A0A090HNM7	3;3;3;3;2;1;1	3;3;3;3;2;1;1	3;3;3;3;2;1;1	DNA repair protein complementing XP-G cells	ERCC5;BIVM-ERCC5;ERCC5-201	sp|P28715|ERCC5_HUMAN DNA repair protein complementing XP-G cells OS=Homo sapiens OX=9606 GN=ERCC5 PE=1 SV=3;tr|A0A494C0S2|A0A494C0S2_HUMAN DNA repair protein-complementing XP-G cells OS=Homo sapiens OX=9606 GN=ERCC5 PE=1 SV=1;tr|A0A1W2PS85|A0A1W2PS85_HUMA	7	3	3	3	0	0	3	0	0	0	0	0	1	0	0	0	0	0	3	0	0	0	0	0	1	0	0	0	0	0	3	0	0	0	0	0	1	0	0	0	6.5
374	Q92664;A0A1X7SBT5;Q92664-2;H7C326;H7BZH7	Q92664;A0A1X7SBT5;Q92664-2	5;5;5;2;2	5;5;5;2;2	5;5;5;2;2	Transcription factor IIIA	GTF3A	sp|Q92664|TF3A_HUMAN Transcription factor IIIA OS=Homo sapiens OX=9606 GN=GTF3A PE=1 SV=3;tr|A0A1X7SBT5|A0A1X7SBT5_HUMAN Transcription factor IIIA OS=Homo sapiens OX=9606 GN=GTF3A PE=1 SV=1;sp|Q92664-2|TF3A_HUMAN Isoform 2 of Transcription factor IIIA OS=H	5	5	5	5	0	0	5	0	0	0	0	0	0	0	0	0	0	0	5	0	0	0	0	0	0	0	0	0	0	0	5	0	0	0	0	0	0	0	0	0	24.1
375	Q9P246;Q9P246-2;A0A1X7SBY3;H0Y860;H7C5C6;H7C5A5;Q9P246-3;H7C5K2;R4GN82;R4GMP0;R4GNC5	Q9P246;Q9P246-2;A0A1X7SBY3;H0Y860;H7C5C6;H7C5A5;Q9P246-3;H7C5K2	8;8;8;8;6;6;6;4;2;2;1	8;8;8;8;6;6;6;4;2;2;1	8;8;8;8;6;6;6;4;2;2;1	Stromal interaction molecule 2	STIM2	sp|Q9P246|STIM2_HUMAN Stromal interaction molecule 2 OS=Homo sapiens OX=9606 GN=STIM2 PE=1 SV=2;sp|Q9P246-2|STIM2_HUMAN Isoform 2 of Stromal interaction molecule 2 OS=Homo sapiens OX=9606 GN=STIM2;tr|A0A1X7SBY3|A0A1X7SBY3_HUMAN Stromal interaction molecule	11	8	8	8	0	0	1	0	0	0	2	0	2	1	7	0	0	0	1	0	0	0	2	0	2	1	7	0	0	0	1	0	0	0	2	0	2	1	7	0	13.8
376	Q92841;A0A1X7SBZ2;A0A5H1ZRQ2;Q92841-3;Q92841-1;Q92841-2;A0A0U1RQJ0	Q92841;A0A1X7SBZ2;A0A5H1ZRQ2;Q92841-3;Q92841-1;Q92841-2	55;55;55;53;53;51;4	55;55;55;53;53;51;4	45;45;45;43;43;42;3	Probable ATP-dependent RNA helicase DDX17	DDX17	sp|Q92841|DDX17_HUMAN Probable ATP-dependent RNA helicase DDX17 OS=Homo sapiens OX=9606 GN=DDX17 PE=1 SV=2;tr|A0A1X7SBZ2|A0A1X7SBZ2_HUMAN RNA helicase OS=Homo sapiens OX=9606 GN=DDX17 PE=1 SV=1;tr|A0A5H1ZRQ2|A0A5H1ZRQ2_HUMAN RNA helicase OS=Homo sapiens OX	7	55	55	45	18	47	21	45	19	46	14	53	16	51	18	51	18	47	21	45	19	46	14	53	16	51	18	51	14	38	16	36	14	37	10	43	12	41	14	41	79.4
377	P01860;A0A286YES1;A0A4W9A917	P01860;A0A286YES1;A0A4W9A917	4;4;4	1;1;1	1;1;1	Ig gamma-3 chain C region	IGHG3	sp|P01860|IGHG3_HUMAN Immunoglobulin heavy constant gamma 3 OS=Homo sapiens OX=9606 GN=IGHG3 PE=1 SV=2;tr|A0A286YES1|A0A286YES1_HUMAN Immunoglobulin heavy constant gamma 3 (Fragment) OS=Homo sapiens OX=9606 GN=IGHG3 PE=1 SV=1;tr|A0A4W9A917|A0A4W9A917_HUMAN	3	4	1	1	4	0	0	0	0	1	1	1	0	0	0	1	1	0	0	0	0	0	1	1	0	0	0	0	1	0	0	0	0	0	1	1	0	0	0	0	13
378	P0DJD0;F8VYC4;A0A286YES2;P0DJD1;A0A1W2PNU4	P0DJD0;F8VYC4;A0A286YES2;P0DJD1;A0A1W2PNU4	39;39;39;37;37	1;1;1;0;0	1;1;1;0;0	RANBP2-like and GRIP domain-containing protein 1;RANBP2-like and GRIP domain-containing protein 2	RGPD1;RGPD2	sp|P0DJD0|RGPD1_HUMAN RANBP2-like and GRIP domain-containing protein 1 OS=Homo sapiens OX=9606 GN=RGPD1 PE=2 SV=1;tr|F8VYC4|F8VYC4_HUMAN RANBP2-like and GRIP domain-containing protein 1 OS=Homo sapiens OX=9606 GN=RGPD1 PE=4 SV=1;tr|A0A286YES2|A0A286YES2_HU	5	39	1	1	2	23	2	19	10	30	10	29	2	23	11	26	0	0	0	0	0	0	0	1	0	0	0	0	0	0	0	0	0	0	0	1	0	0	0	0	23.2
379	P08651;P08651-2;A0A286YEX4;P08651-3;P08651-6;P08651-4;P08651-5;A0A590UK09;Q12857-4;Q12857-3;B1AKN6;A0A590UJ82;B1AKN8;B1AKN5;Q12857-2;A0A590UK73;Q12857;B1AKN7;A0A1B0GW37;U3KQE8;A0A1B0GU97;Q5VW26;A0A0A0MRX8;K7EKH0;K7ESG9;Q5VW27;U3KPY9;S4R308;Q5VW30;A0A2R8Y7V8;A0A1B0GWI9;A0A1B0GWJ4;O00712-4;O00712-2;A0A087WXP2;Q5W0Y9;O00712-5;O00712;S4R3K4	P08651;P08651-2;A0A286YEX4;P08651-3;P08651-6;P08651-4;P08651-5	9;9;9;9;9;9;9;3;3;3;3;3;3;3;3;3;3;3;2;2;2;2;2;2;2;2;2;2;2;2;2;2;2;2;2;2;2;2;2	9;9;9;9;9;9;9;3;3;3;3;3;3;3;3;3;3;3;2;2;2;2;2;2;2;2;2;2;2;2;2;2;2;2;2;2;2;2;2	7;7;7;7;7;7;7;1;1;1;1;1;1;1;1;1;1;1;0;0;0;0;0;0;0;0;0;0;0;0;0;0;0;0;0;0;0;0;0	Nuclear factor 1 C-type	NFIC	sp|P08651|NFIC_HUMAN Nuclear factor 1 C-type OS=Homo sapiens OX=9606 GN=NFIC PE=1 SV=2;sp|P08651-2|NFIC_HUMAN Isoform 1 of Nuclear factor 1 C-type OS=Homo sapiens OX=9606 GN=NFIC;tr|A0A286YEX4|A0A286YEX4_HUMAN Nuclear factor 1 OS=Homo sapiens OX=9606 GN=NF	39	9	9	7	0	4	0	5	1	6	0	2	0	5	1	5	0	4	0	5	1	6	0	2	0	5	1	5	0	3	0	4	1	5	0	1	0	4	1	3	26.6
380	P01876;A0A286YEY1;A0A0G2JMB2;P01877;A0A286YEY5	P01876;A0A286YEY1;A0A0G2JMB2	5;5;3;2;2	5;5;3;2;2	5;5;3;2;2	Ig alpha-1 chain C region	IGHA1	sp|P01876|IGHA1_HUMAN Immunoglobulin heavy constant alpha 1 OS=Homo sapiens OX=9606 GN=IGHA1 PE=1 SV=2;tr|A0A286YEY1|A0A286YEY1_HUMAN Immunoglobulin heavy constant alpha 1 (Fragment) OS=Homo sapiens OX=9606 GN=IGHA1 PE=1 SV=1;tr|A0A0G2JMB2|A0A0G2JMB2_HUMAN	5	5	5	5	5	2	0	2	1	0	1	0	0	0	1	1	5	2	0	2	1	0	1	0	0	0	1	1	5	2	0	2	1	0	1	0	0	0	1	1	17
381	P01859;A0A286YEY4	P01859;A0A286YEY4	3;3	1;1	1;1	Ig gamma-2 chain C region	IGHG2	sp|P01859|IGHG2_HUMAN Immunoglobulin heavy constant gamma 2 OS=Homo sapiens OX=9606 GN=IGHG2 PE=1 SV=2;tr|A0A286YEY4|A0A286YEY4_HUMAN Immunoglobulin heavy constant gamma 2 (Fragment) OS=Homo sapiens OX=9606 GN=IGHG2 PE=1 SV=1	2	3	1	1	3	1	0	0	0	0	1	0	0	0	0	0	1	0	0	0	0	0	0	0	0	0	0	0	1	0	0	0	0	0	0	0	0	0	0	0	9.8
382	O43175;A0A286YF22;A0A286YFA2;A0A2C9F2M7;A0A286YFL2;A0A286YFM8;A0A286YF78;A0A286YER3;A0A286YFC8;A0A286YFB2;A0A286YFF3;A0A286YF34;A0A286YFK5;A0A286YFE1	O43175;A0A286YF22;A0A286YFA2;A0A2C9F2M7;A0A286YFL2	12;12;10;10;7;5;4;3;3;3;2;2;2;1	12;12;10;10;7;5;4;3;3;3;2;2;2;1	12;12;10;10;7;5;4;3;3;3;2;2;2;1	D-3-phosphoglycerate dehydrogenase	PHGDH	sp|O43175|SERA_HUMAN D-3-phosphoglycerate dehydrogenase OS=Homo sapiens OX=9606 GN=PHGDH PE=1 SV=4;tr|A0A286YF22|A0A286YF22_HUMAN D-3-phosphoglycerate dehydrogenase OS=Homo sapiens OX=9606 GN=PHGDH PE=1 SV=1;tr|A0A286YFA2|A0A286YFA2_HUMAN D-3-phosphoglycer	14	12	12	12	1	0	6	0	0	0	3	0	12	3	3	2	1	0	6	0	0	0	3	0	12	3	3	2	1	0	6	0	0	0	3	0	12	3	3	2	30
383	Q9UK22;R4GNH2;A0A286YF37	Q9UK22;R4GNH2;A0A286YF37	1;1;1	1;1;1	1;1;1	F-box only protein 2	FBXO2	sp|Q9UK22|FBX2_HUMAN F-box only protein 2 OS=Homo sapiens OX=9606 GN=FBXO2 PE=1 SV=2;tr|R4GNH2|R4GNH2_HUMAN F-box only protein 2 (Fragment) OS=Homo sapiens OX=9606 GN=FBXO2 PE=1 SV=1;tr|A0A286YF37|A0A286YF37_HUMAN F-box only protein 2 (Fragment) OS=Homo sa	3	1	1	1	0	0	0	0	0	0	0	0	1	0	0	0	0	0	0	0	0	0	0	0	1	0	0	0	0	0	0	0	0	0	0	0	1	0	0	0	5.1
384	P31350;A0A286YFD6;P31350-2;C9JXC1	P31350;A0A286YFD6;P31350-2;C9JXC1	2;2;2;1	2;2;2;1	2;2;2;1	Ribonucleoside-diphosphate reductase subunit M2	RRM2	sp|P31350|RIR2_HUMAN Ribonucleoside-diphosphate reductase subunit M2 OS=Homo sapiens OX=9606 GN=RRM2 PE=1 SV=1;tr|A0A286YFD6|A0A286YFD6_HUMAN Ribonucleoside-diphosphate reductase OS=Homo sapiens OX=9606 GN=RRM2 PE=1 SV=1;sp|P31350-2|RIR2_HUMAN Isoform 2 of	4	2	2	2	0	0	0	0	0	0	0	0	2	0	0	0	0	0	0	0	0	0	0	0	2	0	0	0	0	0	0	0	0	0	0	0	2	0	0	0	8
385	P50897;Q5T0S4;A0A286YFE3;A0A2C9F2P4;A0A286YFL8;A0A286YFF7;E9PK48;E9PIA8;P50897-2	P50897;Q5T0S4;A0A286YFE3;A0A2C9F2P4;A0A286YFL8;A0A286YFF7;E9PK48	3;3;3;3;3;3;2;1;1	3;3;3;3;3;3;2;1;1	3;3;3;3;3;3;2;1;1	Palmitoyl-protein thioesterase 1	PPT1	sp|P50897|PPT1_HUMAN Palmitoyl-protein thioesterase 1 OS=Homo sapiens OX=9606 GN=PPT1 PE=1 SV=1;tr|Q5T0S4|Q5T0S4_HUMAN Palmitoyl-protein hydrolase 1 OS=Homo sapiens OX=9606 GN=PPT1 PE=1 SV=2;tr|A0A286YFE3|A0A286YFE3_HUMAN Palmitoyl-protein hydrolase 1 OS=H	9	3	3	3	0	0	1	0	0	0	0	0	3	0	0	0	0	0	1	0	0	0	0	0	3	0	0	0	0	0	1	0	0	0	0	0	3	0	0	0	16
386	Q7Z3U7;A0A286YFF8;Q7Z3U7-2;Q7Z3U7-6;Q7Z3U7-5;Q7Z3U7-3;F8VZV1	Q7Z3U7;A0A286YFF8;Q7Z3U7-2;Q7Z3U7-6;Q7Z3U7-5;Q7Z3U7-3	14;14;14;14;14;7;5	14;14;14;14;14;7;5	14;14;14;14;14;7;5	Protein MON2 homolog	MON2	sp|Q7Z3U7|MON2_HUMAN Protein MON2 homolog OS=Homo sapiens OX=9606 GN=MON2 PE=1 SV=3;tr|A0A286YFF8|A0A286YFF8_HUMAN Protein MON2 homolog OS=Homo sapiens OX=9606 GN=MON2 PE=1 SV=1;sp|Q7Z3U7-2|MON2_HUMAN Isoform 2 of Protein MON2 homolog OS=Homo sapiens OX=96	7	14	14	14	1	0	12	0	0	0	0	0	3	0	0	0	1	0	12	0	0	0	0	0	3	0	0	0	1	0	12	0	0	0	0	0	3	0	0	0	9.1
387	P01861;A0A286YFJ8	P01861;A0A286YFJ8	3;3	1;1	1;1	Ig gamma-4 chain C region	IGHG4	sp|P01861|IGHG4_HUMAN Immunoglobulin heavy constant gamma 4 OS=Homo sapiens OX=9606 GN=IGHG4 PE=1 SV=1;tr|A0A286YFJ8|A0A286YFJ8_HUMAN Immunoglobulin heavy constant gamma 4 (Fragment) OS=Homo sapiens OX=9606 GN=IGHG4 PE=1 SV=1	2	3	1	1	2	0	0	1	0	1	0	0	0	1	0	1	0	0	0	1	0	1	0	0	0	1	0	1	0	0	0	1	0	1	0	0	0	1	0	1	9.8
388	Q7Z3E5;C9JW07;A0A2Q3DP09;Q7Z3E5-2	Q7Z3E5;C9JW07;A0A2Q3DP09;Q7Z3E5-2	1;1;1;1	1;1;1;1	1;1;1;1	LisH domain-containing protein ARMC9	ARMC9	sp|Q7Z3E5|ARMC9_HUMAN LisH domain-containing protein ARMC9 OS=Homo sapiens OX=9606 GN=ARMC9 PE=1 SV=3;tr|C9JW07|C9JW07_HUMAN LisH domain-containing protein ARMC9 (Fragment) OS=Homo sapiens OX=9606 GN=ARMC9 PE=1 SV=1;tr|A0A2Q3DP09|A0A2Q3DP09_HUMAN LisH doma	4	1	1	1	0	0	0	0	0	0	0	0	1	0	0	0	0	0	0	0	0	0	0	0	1	0	0	0	0	0	0	0	0	0	0	0	1	0	0	0	1.8
389	Q13555;Q13555-2;A0A2Q3DQE3;Q13555-11;Q13555-4;Q13555-8;Q13555-6;Q13555-10;Q13555-3;Q13555-5;Q13555-9;Q5SWX3;Q8WU40;Q13555-7;H0Y6G2;H7BXS4;H7C394	Q13555;Q13555-2;A0A2Q3DQE3;Q13555-11;Q13555-4;Q13555-8;Q13555-6;Q13555-10;Q13555-3;Q13555-5;Q13555-9;Q5SWX3;Q8WU40;Q13555-7;H0Y6G2	17;17;17;17;17;17;17;16;16;16;16;16;16;16;13;6;2	13;13;13;13;13;13;13;12;12;12;12;12;12;12;11;2;2	9;9;9;9;9;9;9;8;8;8;8;8;8;8;7;0;0	Calcium/calmodulin-dependent protein kinase type II subunit gamma	CAMK2G	sp|Q13555|KCC2G_HUMAN Calcium/calmodulin-dependent protein kinase type II subunit gamma OS=Homo sapiens OX=9606 GN=CAMK2G PE=1 SV=4;sp|Q13555-2|KCC2G_HUMAN Isoform 2 of Calcium/calmodulin-dependent protein kinase type II subunit gamma OS=Homo sapiens OX=96	17	17	13	9	1	0	4	0	5	0	3	2	12	1	10	3	0	0	2	0	2	0	0	0	9	0	6	0	0	0	1	0	1	0	0	0	6	0	4	0	53
390	P42336;A0A2R8Y2F6	P42336;A0A2R8Y2F6	1;1	1;1	1;1	Phosphatidylinositol 4,5-bisphosphate 3-kinase catalytic subunit alpha isoform	PIK3CA	sp|P42336|PK3CA_HUMAN Phosphatidylinositol 4,5-bisphosphate 3-kinase catalytic subunit alpha isoform OS=Homo sapiens OX=9606 GN=PIK3CA PE=1 SV=2;tr|A0A2R8Y2F6|A0A2R8Y2F6_HUMAN Phosphatidylinositol-4,5-bisphosphate 3-kinase OS=Homo sapiens OX=9606 GN=PIK3CA	2	1	1	1	0	0	0	0	0	0	0	0	0	0	1	0	0	0	0	0	0	0	0	0	0	0	1	0	0	0	0	0	0	0	0	0	0	0	1	0	0.8
391	Q9UQ90;A0A2U3TZH1;A0A2R8Y3M4;A0A2R8YFW4;A0A2R8YDQ1;A0A2R8Y4Y7;A0A2R8Y726;A0A2R8Y7B8;A0A2R8Y7E2;A0A2R8Y6K2;A0A2R8YFJ7;A0A2R8Y6E8;A0A2R8Y4M8;A0A2R8Y729;A0A2R8YEH4;A0A2R8Y7N2;A0A2R8Y632;A0A2R8YFF4;A0A2R8YGZ0;J3KRF6;A0A2R8YG79;A0A2R8Y4M0;Q9UQ90-2;A0A2R8Y4Z7;A0A2R8Y617;A0A2R8Y6Z7;A0A087X0F5;A0A2R8YFN9;H3BTY6;A0A2R8Y4L7;A0A2R8YGV4;A0A2R8Y4L0;A0A2R8Y856	Q9UQ90;A0A2U3TZH1;A0A2R8Y3M4;A0A2R8YFW4;A0A2R8YDQ1;A0A2R8Y4Y7;A0A2R8Y726;A0A2R8Y7B8;A0A2R8Y7E2;A0A2R8Y6K2;A0A2R8YFJ7;A0A2R8Y6E8;A0A2R8Y4M8	9;9;9;9;9;9;9;8;8;6;5;5;5;4;4;4;4;4;4;4;4;4;4;3;2;2;1;1;1;1;1;1;1	9;9;9;9;9;9;9;8;8;6;5;5;5;4;4;4;4;4;4;4;4;4;4;3;2;2;1;1;1;1;1;1;1	9;9;9;9;9;9;9;8;8;6;5;5;5;4;4;4;4;4;4;4;4;4;4;3;2;2;1;1;1;1;1;1;1	Paraplegin	SPG7	sp|Q9UQ90|SPG7_HUMAN Paraplegin OS=Homo sapiens OX=9606 GN=SPG7 PE=1 SV=2;tr|A0A2U3TZH1|A0A2U3TZH1_HUMAN Paraplegin OS=Homo sapiens OX=9606 GN=SPG7 PE=1 SV=1;tr|A0A2R8Y3M4|A0A2R8Y3M4_HUMAN Paraplegin OS=Homo sapiens OX=9606 GN=SPG7 PE=1 SV=1;tr|A0A2R8YFW4|	33	9	9	9	0	0	8	0	0	0	0	0	1	0	0	0	0	0	8	0	0	0	0	0	1	0	0	0	0	0	8	0	0	0	0	0	1	0	0	0	21.9
392	P05156;G3XAM2;E7ETH0;A0A2R8Y3M9;D6R9Z8;A0A087X0I2	P05156;G3XAM2;E7ETH0;A0A2R8Y3M9;D6R9Z8;A0A087X0I2	2;2;2;2;1;1	2;2;2;2;1;1	2;2;2;2;1;1	Complement factor I;Complement factor I heavy chain;Complement factor I light chain	CFI	sp|P05156|CFAI_HUMAN Complement factor I OS=Homo sapiens OX=9606 GN=CFI PE=1 SV=2;tr|G3XAM2|G3XAM2_HUMAN Complement factor I OS=Homo sapiens OX=9606 GN=CFI PE=1 SV=1;tr|E7ETH0|E7ETH0_HUMAN Complement factor I OS=Homo sapiens OX=9606 GN=CFI PE=1 SV=1;tr|A0A	6	2	2	2	0	0	0	0	0	0	2	0	1	0	1	0	0	0	0	0	0	0	2	0	1	0	1	0	0	0	0	0	0	0	2	0	1	0	1	0	5.1
393	P49590;A0A2R8Y6I1;A0A2R8Y3N3;A0A2R8Y5P7;P49590-2;D6RB22;B4DQ67;D6RJE6;A0A2R8Y4X6;A0A2R8Y5E8;E7ETE2	P49590;A0A2R8Y6I1;A0A2R8Y3N3;A0A2R8Y5P7;P49590-2;D6RB22;B4DQ67;D6RJE6	9;9;9;9;9;7;6;5;3;3;3	9;9;9;9;9;7;6;5;3;3;3	5;5;5;5;5;4;3;2;2;2;0	Probable histidine--tRNA ligase, mitochondrial	HARS2	sp|P49590|SYHM_HUMAN Histidine--tRNA ligase, mitochondrial OS=Homo sapiens OX=9606 GN=HARS2 PE=1 SV=1;tr|A0A2R8Y6I1|A0A2R8Y6I1_HUMAN Histidine--tRNA ligase OS=Homo sapiens OX=9606 GN=HARS2 PE=1 SV=1;tr|A0A2R8Y3N3|A0A2R8Y3N3_HUMAN Histidine--tRNA ligase OS=	11	9	9	5	1	0	9	0	1	0	0	0	0	0	0	0	1	0	9	0	1	0	0	0	0	0	0	0	0	0	5	0	0	0	0	0	0	0	0	0	21.1
394	Q96JX3;A0A2R8YCL0;A0A2R8Y511;A0A2R8YFH3;A0A2R8Y3S0	Q96JX3;A0A2R8YCL0;A0A2R8Y511;A0A2R8YFH3;A0A2R8Y3S0	1;1;1;1;1	1;1;1;1;1	1;1;1;1;1	Protein SERAC1	SERAC1	sp|Q96JX3|SRAC1_HUMAN Protein SERAC1 OS=Homo sapiens OX=9606 GN=SERAC1 PE=1 SV=1;tr|A0A2R8YCL0|A0A2R8YCL0_HUMAN Protein SERAC1 OS=Homo sapiens OX=9606 GN=SERAC1 PE=1 SV=1;tr|A0A2R8Y511|A0A2R8Y511_HUMAN Protein SERAC1 OS=Homo sapiens OX=9606 GN=SERAC1 PE=1	5	1	1	1	0	0	1	0	0	0	0	0	0	0	0	0	0	0	1	0	0	0	0	0	0	0	0	0	0	0	1	0	0	0	0	0	0	0	0	0	1.7
395	Q5JTW2;Q5JTW2-2;A0A2R8Y589;A0A2R8Y4C1;A0A2R8Y7U5;A8MST6;A0A2U3TZI9;A0A2R8Y5W6;A0A2R8Y432;A0A2R8YCP0;A0A2R8Y7A4;Q5JTW2-3;Q5JTW2-5	Q5JTW2;Q5JTW2-2;A0A2R8Y589;A0A2R8Y4C1;A0A2R8Y7U5;A8MST6;A0A2U3TZI9;A0A2R8Y5W6;A0A2R8Y432;A0A2R8YCP0;A0A2R8Y7A4;Q5JTW2-3;Q5JTW2-5	2;2;2;2;2;2;2;2;2;2;2;2;2	2;2;2;2;2;2;2;2;2;2;2;2;2	2;2;2;2;2;2;2;2;2;2;2;2;2	Centrosomal protein of 78 kDa	CEP78	sp|Q5JTW2|CEP78_HUMAN Centrosomal protein of 78 kDa OS=Homo sapiens OX=9606 GN=CEP78 PE=1 SV=1;sp|Q5JTW2-2|CEP78_HUMAN Isoform 2 of Centrosomal protein of 78 kDa OS=Homo sapiens OX=9606 GN=CEP78;tr|A0A2R8Y589|A0A2R8Y589_HUMAN Centrosomal protein of 78 kDa	13	2	2	2	0	0	0	0	0	0	0	0	2	0	0	0	0	0	0	0	0	0	0	0	2	0	0	0	0	0	0	0	0	0	0	0	2	0	0	0	6.1
396	Q9UBP0;A0A2R8YGN6;A0A2R8Y4I8;A0A2U3TZR0;Q9UBP0-4;Q9UBP0-3;Q9UBP0-2;A0A2R8Y7K2;A0A2R8Y481;A0A2R8YFW8;A0A2R8YCL5;A0A2R8Y7W6;A0A2R8YEA0;A0A2R8YFC9;A0A2R8Y5N9	Q9UBP0;A0A2R8YGN6;A0A2R8Y4I8;A0A2U3TZR0;Q9UBP0-4;Q9UBP0-3;Q9UBP0-2;A0A2R8Y7K2;A0A2R8Y481;A0A2R8YFW8;A0A2R8YCL5	3;3;3;3;3;3;3;2;2;2;2;1;1;1;1	3;3;3;3;3;3;3;2;2;2;2;1;1;1;1	3;3;3;3;3;3;3;2;2;2;2;1;1;1;1	Spastin	SPAST	sp|Q9UBP0|SPAST_HUMAN Spastin OS=Homo sapiens OX=9606 GN=SPAST PE=1 SV=1;tr|A0A2R8YGN6|A0A2R8YGN6_HUMAN Spastin (Fragment) OS=Homo sapiens OX=9606 GN=SPAST PE=1 SV=1;tr|A0A2R8Y4I8|A0A2R8Y4I8_HUMAN Spastin OS=Homo sapiens OX=9606 GN=SPAST PE=1 SV=1;tr|A0A2U	15	3	3	3	0	0	2	0	0	0	0	0	0	0	0	1	0	0	2	0	0	0	0	0	0	0	0	1	0	0	2	0	0	0	0	0	0	0	0	1	9.4
397	A0A2R8Y4P4;A0A2R8Y7S2;P51532-4;P51532-3;P51532-2;P51532-5;A0A0A0MT49;A0A2R8Y440;A0A2R8Y4C5;A0A2R8YF58;A0A2R8YF80;A0A2R8YGP5;A0A2R8YCY3;A0A2R8YFV8;A0A2R8Y4R6;K7EQF0;A0A2R8YFK5;K7EP28;A0A2R8Y7R0;A0A0U1RRF5;A0A2R8Y583;A0A2R8Y866;A0A2R8YF38	A0A2R8Y4P4;A0A2R8Y7S2;P51532-4;P51532-3;P51532-2;P51532-5;A0A0A0MT49;A0A2R8Y440;A0A2R8Y4C5;A0A2R8YF58;A0A2R8YF80;A0A2R8YGP5	89;89;88;88;88;88;85;75;71;67;67;64;28;28;19;16;15;13;10;4;3;1;1	89;89;88;88;88;88;85;75;71;67;67;64;28;28;19;16;15;13;10;4;3;1;1	2;2;2;2;2;2;2;2;2;2;2;0;0;0;0;0;0;0;0;0;0;0;0	Transcription activator BRG1	SMARCA4	tr|A0A2R8Y4P4|A0A2R8Y4P4_HUMAN Transcription activator BRG1 OS=Homo sapiens OX=9606 GN=SMARCA4 PE=1 SV=1;tr|A0A2R8Y7S2|A0A2R8Y7S2_HUMAN Transcription activator BRG1 OS=Homo sapiens OX=9606 GN=SMARCA4 PE=1 SV=1;sp|P51532-4|SMCA4_HUMAN Isoform 4 of Transcrip	23	89	89	2	0	67	0	59	0	74	1	74	0	65	0	74	0	67	0	59	0	74	1	74	0	65	0	74	0	1	0	1	0	1	0	2	0	2	0	2	57.6
398	O75648;A0A2R8Y4R7;A0A2R8Y6L6;O75648-2;O75648-3;A0A2R8YDK3;O75648-4	O75648;A0A2R8Y4R7;A0A2R8Y6L6;O75648-2;O75648-3;A0A2R8YDK3;O75648-4	2;2;2;2;1;1;1	2;2;2;2;1;1;1	2;2;2;2;1;1;1	Mitochondrial tRNA-specific 2-thiouridylase 1	TRMU	sp|O75648|MTU1_HUMAN Mitochondrial tRNA-specific 2-thiouridylase 1 OS=Homo sapiens OX=9606 GN=TRMU PE=1 SV=2;tr|A0A2R8Y4R7|A0A2R8Y4R7_HUMAN Mitochondrial tRNA-specific 2-thiouridylase 1 (Fragment) OS=Homo sapiens OX=9606 GN=TRMU PE=1 SV=1;tr|A0A2R8Y6L6|A0A	7	2	2	2	0	0	1	0	0	0	0	0	1	0	0	0	0	0	1	0	0	0	0	0	1	0	0	0	0	0	1	0	0	0	0	0	1	0	0	0	8.8
399	A0A2R8Y4T1;E9PGF5;A0A494C067;Q9HBL0;E9PF55;A0A087WWW7;H0Y4U1;E7ERH1;E7EMG1;Q9HBL0-2;C9JI43;C9J8K5;H7C3Z4;C9JFT7;C9JZT0	A0A2R8Y4T1;E9PGF5;A0A494C067;Q9HBL0;E9PF55;A0A087WWW7;H0Y4U1	82;81;81;80;78;67;45;28;17;14;4;3;3;2;1	82;81;81;80;78;67;45;28;17;14;4;3;3;2;1	80;79;79;78;76;65;43;28;17;14;4;3;3;2;1	Tensin-1	TNS1	tr|A0A2R8Y4T1|A0A2R8Y4T1_HUMAN Tensin-1 OS=Homo sapiens OX=9606 GN=TNS1 PE=1 SV=1;tr|E9PGF5|E9PGF5_HUMAN Tensin-1 OS=Homo sapiens OX=9606 GN=TNS1 PE=1 SV=1;tr|A0A494C067|A0A494C067_HUMAN Tensin-1 (Fragment) OS=Homo sapiens OX=9606 GN=TNS1 PE=1 SV=1;sp|Q9HB	15	82	82	80	68	28	33	30	63	36	75	6	28	9	66	21	68	28	33	30	63	36	75	6	28	9	66	21	66	27	33	28	61	34	73	6	27	9	64	21	72.4
400	Q3V6T2;A0A2R8Y4X4;A0A2U3TZV9;A0A2R8Y7B1;A0A2R8YG73;A0A2R8Y4W8;A0A2R8YGU1;Q3V6T2-5;Q3V6T2-4;Q3V6T2-2;Q3V6T2-3;A0A087WXD9;A0A2R8YG52;H0Y7U8;H0Y470;H7C2C6;A0A2R8Y7D9;A0A2R8Y885;A0A2R8YCU9;A0A2R8Y820;A0A2R8Y6B2;A0A2R8Y7D4;A0A2R8YDS8	Q3V6T2;A0A2R8Y4X4;A0A2U3TZV9;A0A2R8Y7B1;A0A2R8YG73;A0A2R8Y4W8;A0A2R8YGU1;Q3V6T2-5;Q3V6T2-4;Q3V6T2-2;Q3V6T2-3;A0A087WXD9;A0A2R8YG52	3;3;3;3;3;3;3;3;3;3;3;2;2;1;1;1;1;1;1;1;1;1;1	3;3;3;3;3;3;3;3;3;3;3;2;2;1;1;1;1;1;1;1;1;1;1	3;3;3;3;3;3;3;3;3;3;3;2;2;1;1;1;1;1;1;1;1;1;1	Girdin	CCDC88A	sp|Q3V6T2|GRDN_HUMAN Girdin OS=Homo sapiens OX=9606 GN=CCDC88A PE=1 SV=2;tr|A0A2R8Y4X4|A0A2R8Y4X4_HUMAN Girdin OS=Homo sapiens OX=9606 GN=CCDC88A PE=1 SV=1;tr|A0A2U3TZV9|A0A2U3TZV9_HUMAN Girdin OS=Homo sapiens OX=9606 GN=CCDC88A PE=1 SV=1;tr|A0A2R8Y7B1|A0A	23	3	3	3	0	0	1	0	0	0	0	0	1	0	1	0	0	0	1	0	0	0	0	0	1	0	1	0	0	0	1	0	0	0	0	0	1	0	1	0	2.2
401	Q14004;Q14004-2;A0A2R8YF61;A0A2R8Y7W5;A0A2R8Y4Z0;A0A2R8Y644;Q9BVE2;A0A087X209;A0A2R8YD28;A0A2R8YEB7;A0A590UJE9	Q14004;Q14004-2;A0A2R8YF61;A0A2R8Y7W5;A0A2R8Y4Z0	11;11;11;11;11;4;4;4;4;2;1	10;10;10;10;10;3;3;3;3;1;1	8;8;8;8;8;1;1;1;1;0;0	Cyclin-dependent kinase 13	CDK13	sp|Q14004|CDK13_HUMAN Cyclin-dependent kinase 13 OS=Homo sapiens OX=9606 GN=CDK13 PE=1 SV=2;sp|Q14004-2|CDK13_HUMAN Isoform 2 of Cyclin-dependent kinase 13 OS=Homo sapiens OX=9606 GN=CDK13;tr|A0A2R8YF61|A0A2R8YF61_HUMAN Cyclin-dependent kinase 13 (Fragment	11	11	10	8	0	3	1	2	0	2	2	3	5	7	0	9	0	2	1	1	0	1	1	2	4	6	0	8	0	1	0	0	0	0	0	1	4	4	0	6	13.5
402	P35222;A0A2R8Y804;A0A2R8Y543;A0A2R8YCH5;A0A2R8Y5A3;B4DGU4;A0A2R8Y7Z0;A0A2R8Y750;A0A2R8Y5Z1;A0A2R8Y5C3;A0A2R8Y6G0;A0A2R8Y815;C9IZ65;A0A2R8YG06	P35222;A0A2R8Y804;A0A2R8Y543;A0A2R8YCH5;A0A2R8Y5A3;B4DGU4;A0A2R8Y7Z0;A0A2R8Y750;A0A2R8Y5Z1;A0A2R8Y5C3;A0A2R8Y6G0	25;25;25;25;25;24;24;23;23;22;13;6;1;1	21;21;21;21;21;20;20;19;19;18;10;6;1;1	21;21;21;21;21;20;20;19;19;18;10;6;1;1	Catenin beta-1	CTNNB1	sp|P35222|CTNB1_HUMAN Catenin beta-1 OS=Homo sapiens OX=9606 GN=CTNNB1 PE=1 SV=1;tr|A0A2R8Y804|A0A2R8Y804_HUMAN Catenin beta-1 OS=Homo sapiens OX=9606 GN=CTNNB1 PE=1 SV=1;tr|A0A2R8Y543|A0A2R8Y543_HUMAN Catenin beta-1 OS=Homo sapiens OX=9606 GN=CTNNB1 PE=1	14	25	21	21	0	9	13	8	11	10	1	1	12	10	13	8	0	8	12	8	10	9	1	0	12	9	11	7	0	8	12	8	10	9	1	0	12	9	11	7	46.4
403	Q8NI35;A0A2R8Y549;Q8NI35-3;Q8NI35-2;Q8NI35-4;A0A0X1KG69;A0A087WUZ6;Q8NI35-5;A0A0U1RR46;A0A0U1RQT2;A0A2R8Y5I3;B4DE90;A0A0U1RQR3;A0A0U1RRD7;A0A0U1RQW4	Q8NI35;A0A2R8Y549;Q8NI35-3;Q8NI35-2;Q8NI35-4;A0A0X1KG69;A0A087WUZ6;Q8NI35-5	38;38;34;33;32;27;26;21;17;10;10;7;3;2;2	38;38;34;33;32;27;26;21;17;10;10;7;3;2;2	37;37;33;32;31;27;26;20;17;9;9;6;2;2;2	InaD-like protein	INADL	sp|Q8NI35|INADL_HUMAN InaD-like protein OS=Homo sapiens OX=9606 GN=PATJ PE=1 SV=3;tr|A0A2R8Y549|A0A2R8Y549_HUMAN InaD-like protein OS=Homo sapiens OX=9606 GN=PATJ PE=1 SV=1;sp|Q8NI35-3|INADL_HUMAN Isoform 3 of InaD-like protein OS=Homo sapiens OX=9606 GN=P	15	38	38	37	0	0	3	0	9	0	0	0	5	6	34	0	0	0	3	0	9	0	0	0	5	6	34	0	0	0	3	0	9	0	0	0	5	5	33	0	35
404	A0A2R8YDM9;A0A2R8Y5A6;H0YH87;A0A5F9ZI57;A0A2R8Y7E6;Q99700-2;A0A5F9ZHX3;A0A5F9ZH85;A0A2R8Y6W7;A0A2R8YGV1	A0A2R8YDM9;A0A2R8Y5A6;H0YH87;A0A5F9ZI57;A0A2R8Y7E6;Q99700-2;A0A5F9ZHX3	34;34;33;33;33;33;32;16;1;1	34;34;33;33;33;33;32;16;1;1	1;1;0;0;0;0;0;0;1;1	Ataxin-2	ATXN2	tr|A0A2R8YDM9|A0A2R8YDM9_HUMAN Ataxin-2 OS=Homo sapiens OX=9606 GN=ATXN2 PE=1 SV=1;tr|A0A2R8Y5A6|A0A2R8Y5A6_HUMAN Ataxin-2 OS=Homo sapiens OX=9606 GN=ATXN2 PE=1 SV=1;tr|H0YH87|H0YH87_HUMAN Ataxin-2 OS=Homo sapiens OX=9606 GN=ATXN2 PE=1 SV=2;tr|A0A5F9ZI57|A	10	34	34	1	17	4	20	3	20	6	24	8	16	9	26	16	17	4	20	3	20	6	24	8	16	9	26	16	0	0	1	0	0	0	1	0	1	0	1	1	48.6
405	A0A2R8Y5C4	A0A2R8Y5C4	19	2	2			tr|A0A2R8Y5C4|A0A2R8Y5C4_HUMAN 182 kDa tankyrase-1-binding protein (Fragment) OS=Homo sapiens OX=9606 GN=TNKS1BP1 PE=1 SV=1	1	19	2	2	10	0	1	0	18	1	12	0	4	0	14	1	0	0	0	0	2	0	0	0	0	0	0	0	0	0	0	0	2	0	0	0	0	0	0	0	77.4
406	O15160;A0A2R8YEZ4;A0A2R8Y5D3;O15160-2;A0A2R8YEY5;E7EQB9;D6RDJ3;A0A2R8Y8D6;H0Y723	O15160;A0A2R8YEZ4;A0A2R8Y5D3;O15160-2;A0A2R8YEY5;E7EQB9;D6RDJ3;A0A2R8Y8D6;H0Y723	6;6;6;6;5;5;4;4;3	6;6;6;6;5;5;4;4;3	6;6;6;6;5;5;4;4;3	DNA-directed RNA polymerases I and III subunit RPAC1	POLR1C	sp|O15160|RPAC1_HUMAN DNA-directed RNA polymerases I and III subunit RPAC1 OS=Homo sapiens OX=9606 GN=POLR1C PE=1 SV=1;tr|A0A2R8YEZ4|A0A2R8YEZ4_HUMAN DNA-directed RNA polymerases I and III subunit RPAC1 OS=Homo sapiens OX=9606 GN=POLR1C PE=1 SV=1;tr|A0A2R8	9	6	6	6	0	0	3	2	0	0	0	0	3	4	0	0	0	0	3	2	0	0	0	0	3	4	0	0	0	0	3	2	0	0	0	0	3	4	0	0	22.5
407	P49815;H3BMQ0;A0A2R8YGD6;A0A2R8Y7C8;A0A2R8YDR3;A0A2R8Y7X5;A0A2R8YDZ2;X5D2U8;A0A2R8YEJ8;P49815-3;P49815-7;P49815-2;P49815-5;P49815-6;A0A2R8Y5F1;P49815-4;A0A2R8YGU4	P49815;H3BMQ0;A0A2R8YGD6;A0A2R8Y7C8;A0A2R8YDR3;A0A2R8Y7X5;A0A2R8YDZ2;X5D2U8;A0A2R8YEJ8;P49815-3;P49815-7;P49815-2;P49815-5;P49815-6;A0A2R8Y5F1;P49815-4;A0A2R8YGU4	1;1;1;1;1;1;1;1;1;1;1;1;1;1;1;1;1	1;1;1;1;1;1;1;1;1;1;1;1;1;1;1;1;1	1;1;1;1;1;1;1;1;1;1;1;1;1;1;1;1;1	Tuberin	TSC2	sp|P49815|TSC2_HUMAN Tuberin OS=Homo sapiens OX=9606 GN=TSC2 PE=1 SV=2;tr|H3BMQ0|H3BMQ0_HUMAN Tuberin OS=Homo sapiens OX=9606 GN=TSC2 PE=1 SV=1;tr|A0A2R8YGD6|A0A2R8YGD6_HUMAN Tuberin OS=Homo sapiens OX=9606 GN=TSC2 PE=1 SV=1;tr|A0A2R8Y7C8|A0A2R8Y7C8_HUMAN	17	1	1	1	0	0	0	0	0	0	0	0	1	0	0	0	0	0	0	0	0	0	0	0	1	0	0	0	0	0	0	0	0	0	0	0	1	0	0	0	0.8
408	P51572-2;P51572;C9JM14;C9JMD7;C9JSP1;C9JQ75;C9J0M4;A0A2R8Y5M6	P51572-2;P51572;C9JM14;C9JMD7;C9JSP1;C9JQ75;C9J0M4;A0A2R8Y5M6	1;1;1;1;1;1;1;1	1;1;1;1;1;1;1;1	1;1;1;1;1;1;1;1	B-cell receptor-associated protein 31	BCAP31	sp|P51572-2|BAP31_HUMAN Isoform 2 of B-cell receptor-associated protein 31 OS=Homo sapiens OX=9606 GN=BCAP31;sp|P51572|BAP31_HUMAN B-cell receptor-associated protein 31 OS=Homo sapiens OX=9606 GN=BCAP31 PE=1 SV=3;tr|C9JM14|C9JM14_HUMAN B-cell receptor-asso	8	1	1	1	0	0	1	0	0	0	0	0	0	0	0	0	0	0	1	0	0	0	0	0	0	0	0	0	0	0	1	0	0	0	0	0	0	0	0	0	5.1
409	P67936;A0A2R8YGX3;A0A2R8Y5V9;A0A590UJB9;A0A590UK79	P67936;A0A2R8YGX3;A0A2R8Y5V9	5;5;5;1;1	1;1;1;1;1	1;1;1;1;1	Tropomyosin alpha-4 chain	TPM4	sp|P67936|TPM4_HUMAN Tropomyosin alpha-4 chain OS=Homo sapiens OX=9606 GN=TPM4 PE=1 SV=3;tr|A0A2R8YGX3|A0A2R8YGX3_HUMAN Tropomyosin alpha-4 chain OS=Homo sapiens OX=9606 GN=TPM4 PE=1 SV=1;tr|A0A2R8Y5V9|A0A2R8Y5V9_HUMAN Tropomyosin alpha-4 chain OS=Homo sap	5	5	1	1	1	0	5	0	0	0	0	0	0	0	0	0	0	0	1	0	0	0	0	0	0	0	0	0	0	0	1	0	0	0	0	0	0	0	0	0	17.7
410	A0A2R8Y645;A0A2U3TZJ9;A0A2R8YFR4;A0A2R8YCW1;A0A2R8Y5G6;O00571-2;A0A2R8Y7T2;A0A2R8YDT5;A0A0J9YVQ7;A0A2R8YF89;Q9NQI0;D6RCM4;Q9NQI0-3;Q9NQI0-2;Q9NQI0-4;H0Y960;A0A2R8Y4D2	A0A2R8Y645;A0A2U3TZJ9;A0A2R8YFR4;A0A2R8YCW1;A0A2R8Y5G6;O00571-2;A0A2R8Y7T2;A0A2R8YDT5	51;51;51;50;48;48;40;40;16;6;2;2;2;2;2;1;1	1;1;1;0;0;0;0;0;0;0;0;0;0;0;0;0;0	1;1;1;0;0;0;0;0;0;0;0;0;0;0;0;0;0	ATP-dependent RNA helicase DDX3X	DDX3X	tr|A0A2R8Y645|A0A2R8Y645_HUMAN RNA helicase OS=Homo sapiens OX=9606 GN=DDX3X PE=1 SV=1;tr|A0A2U3TZJ9|A0A2U3TZJ9_HUMAN RNA helicase OS=Homo sapiens OX=9606 GN=DDX3X PE=1 SV=1;tr|A0A2R8YFR4|A0A2R8YFR4_HUMAN RNA helicase OS=Homo sapiens OX=9606 GN=DDX3X PE=1	17	51	1	1	32	46	30	45	33	45	34	42	24	41	30	42	0	1	0	1	0	0	0	1	0	0	0	0	0	1	0	1	0	0	0	1	0	0	0	0	74.4
411	Q9BZX2;A0A2R8Y653;Q9BZX2-2;Q9HA47;Q9HA47-3;Q9HA47-4	Q9BZX2;A0A2R8Y653	7;7;3;1;1;1	7;7;3;1;1;1	7;7;3;1;1;1	Uridine-cytidine kinase 2	UCK2	sp|Q9BZX2|UCK2_HUMAN Uridine-cytidine kinase 2 OS=Homo sapiens OX=9606 GN=UCK2 PE=1 SV=1;tr|A0A2R8Y653|A0A2R8Y653_HUMAN Uridine kinase OS=Homo sapiens OX=9606 GN=UCK2 PE=1 SV=1	6	7	7	7	4	0	6	1	1	0	0	0	3	0	1	0	4	0	6	1	1	0	0	0	3	0	1	0	4	0	6	1	1	0	0	0	3	0	1	0	33.7
412	A0A2R8Y661;A0A2R8YGD3;Q9Y4G8;H0Y8T6;H0Y8N8;H0Y8H7;H0YAJ8;H0Y905	A0A2R8Y661;A0A2R8YGD3;Q9Y4G8	19;19;18;3;3;3;2;1	16;16;15;3;2;3;2;1	16;16;15;3;2;3;2;1	Rap guanine nucleotide exchange factor 2	RAPGEF2	tr|A0A2R8Y661|A0A2R8Y661_HUMAN Cyclic nucleotide ras GEF OS=Homo sapiens OX=9606 GN=RAPGEF2 PE=1 SV=1;tr|A0A2R8YGD3|A0A2R8YGD3_HUMAN Cyclic nucleotide ras GEF OS=Homo sapiens OX=9606 GN=RAPGEF2 PE=1 SV=1;sp|Q9Y4G8|RPGF2_HUMAN Rap guanine nucleotide exchang	8	19	16	16	0	0	1	0	9	0	0	0	3	0	14	0	0	0	1	0	6	0	0	0	2	0	12	0	0	0	1	0	6	0	0	0	2	0	12	0	20
413	P19447;A0A2R8Y681;A0A2R8Y6W8	P19447;A0A2R8Y681;A0A2R8Y6W8	2;2;1	2;2;1	2;2;1	TFIIH basal transcription factor complex helicase XPB subunit	ERCC3	sp|P19447|ERCC3_HUMAN General transcription and DNA repair factor IIH helicase subunit XPB OS=Homo sapiens OX=9606 GN=ERCC3 PE=1 SV=1;tr|A0A2R8Y681|A0A2R8Y681_HUMAN DNA helicase (Fragment) OS=Homo sapiens OX=9606 GN=ERCC3 PE=1 SV=1;tr|A0A2R8Y6W8|A0A2R8Y6W8	3	2	2	2	0	1	1	1	0	1	0	0	0	0	0	0	0	1	1	1	0	1	0	0	0	0	0	0	0	1	1	1	0	1	0	0	0	0	0	0	3.8
414	A0A2R8Y6I6;A0A2R8Y443;M0R2X3;N0GVR9	A0A2R8Y6I6;A0A2R8Y443	31;22;2;1	1;1;0;1	1;1;0;1			tr|A0A2R8Y6I6|A0A2R8Y6I6_HUMAN Dual-specificity kinase OS=Homo sapiens OX=9606 GN=DYRK1A PE=1 SV=1;tr|A0A2R8Y443|A0A2R8Y443_HUMAN Dual-specificity kinase (Fragment) OS=Homo sapiens OX=9606 GN=DYRK1A PE=1 SV=1	4	31	1	1	21	0	3	0	23	1	25	4	14	3	28	5	1	0	0	0	1	0	1	0	0	0	1	0	1	0	0	0	1	0	1	0	0	0	1	0	48.8
415	P46777;A0A2R8Y6J3;Q5T7N0;A0A2R8Y4A2	P46777;A0A2R8Y6J3	22;22;7;5	22;22;7;5	22;22;7;5	60S ribosomal protein L5	RPL5	sp|P46777|RL5_HUMAN 60S ribosomal protein L5 OS=Homo sapiens OX=9606 GN=RPL5 PE=1 SV=3;tr|A0A2R8Y6J3|A0A2R8Y6J3_HUMAN 60S ribosomal protein L5 (Fragment) OS=Homo sapiens OX=9606 GN=RPL5 PE=1 SV=1	4	22	22	22	12	8	21	11	10	6	7	4	11	13	6	4	12	8	21	11	10	6	7	4	11	13	6	4	12	8	21	11	10	6	7	4	11	13	6	4	56.9
416	A0A2R8Y738	A0A2R8Y738	8	1	1			tr|A0A2R8Y738|A0A2R8Y738_HUMAN Ribosomal protein L15 (Fragment) OS=Homo sapiens OX=9606 GN=RPL15 PE=1 SV=1	1	8	1	1	5	5	5	5	5	3	4	3	4	4	3	3	0	0	0	0	0	0	0	0	1	0	0	0	0	0	0	0	0	0	0	0	1	0	0	0	53.6
417	Q99700;A0A2R8Y7P6;V9GY86;A0A5F9ZHW5;Q99700-4;A0A5F9ZHH4;F8VQP2;Q99700-5;A0A5F9ZHG6	Q99700;A0A2R8Y7P6;V9GY86;A0A5F9ZHW5;Q99700-4;A0A5F9ZHH4;F8VQP2;Q99700-5	34;34;34;34;34;32;32;29;1	1;1;1;1;1;1;1;1;1	0;0;0;0;0;0;0;0;0	Ataxin-2	ATXN2	sp|Q99700|ATX2_HUMAN Ataxin-2 OS=Homo sapiens OX=9606 GN=ATXN2 PE=1 SV=2;tr|A0A2R8Y7P6|A0A2R8Y7P6_HUMAN Ataxin-2 OS=Homo sapiens OX=9606 GN=ATXN2 PE=1 SV=1;tr|V9GY86|V9GY86_HUMAN Ataxin-2 OS=Homo sapiens OX=9606 GN=ATXN2 PE=1 SV=1;tr|A0A5F9ZHW5|A0A5F9ZHW5_	9	34	1	0	17	4	19	3	20	6	24	8	15	9	26	15	0	0	0	0	0	0	1	0	0	0	1	0	0	0	0	0	0	0	0	0	0	0	0	0	35.9
418	Q12830;Q12830-4;Q12830-2;F5GXF5;E7ETD6;E9PE19;A0A2R8Y7Q1;A0A0A0MR81	Q12830;Q12830-4;Q12830-2;F5GXF5;E7ETD6;E9PE19;A0A2R8Y7Q1	4;4;4;4;4;4;4;1	4;4;4;4;4;4;4;1	4;4;4;4;4;4;4;1	Nucleosome-remodeling factor subunit BPTF	BPTF	sp|Q12830|BPTF_HUMAN Nucleosome-remodeling factor subunit BPTF OS=Homo sapiens OX=9606 GN=BPTF PE=1 SV=3;sp|Q12830-4|BPTF_HUMAN Isoform 4 of Nucleosome-remodeling factor subunit BPTF OS=Homo sapiens OX=9606 GN=BPTF;sp|Q12830-2|BPTF_HUMAN Isoform 2 of Nucle	8	4	4	4	0	0	0	2	0	3	0	0	0	3	0	1	0	0	0	2	0	3	0	0	0	3	0	1	0	0	0	2	0	3	0	0	0	3	0	1	2.2
419	Q13136;A0A2R8Y7R9;Q13136-2;H0YD72;H0YDW2;H0YEF9;E9PJZ7	Q13136;A0A2R8Y7R9;Q13136-2;H0YD72;H0YDW2	4;4;4;2;2;1;1	4;4;4;2;2;1;1	4;4;4;2;2;1;1	Liprin-alpha-1	PPFIA1	sp|Q13136|LIPA1_HUMAN Liprin-alpha-1 OS=Homo sapiens OX=9606 GN=PPFIA1 PE=1 SV=1;tr|A0A2R8Y7R9|A0A2R8Y7R9_HUMAN Liprin-alpha-1 (Fragment) OS=Homo sapiens OX=9606 GN=PPFIA1 PE=1 SV=1;sp|Q13136-2|LIPA1_HUMAN Isoform 2 of Liprin-alpha-1 OS=Homo sapiens OX=960	7	4	4	4	0	0	1	0	1	0	0	0	0	2	2	0	0	0	1	0	1	0	0	0	0	2	2	0	0	0	1	0	1	0	0	0	0	2	2	0	5.2
420	O75140;A0A2R8Y7U0;O75140-9;O75140-4;O75140-1;A0A2R8Y6H3;A0A2R8Y5K9;H0Y770;A0A2R8Y721;O75140-5;O75140-8;A0A5F9UWT1;A0A2R8Y6V4;A0A2R8YEW8;A0A2R8Y5T1;O75140-6;A0A2R8Y842;A0A2R8Y5E9;A0A2R8Y7U6;A0A2R8Y6H8;A0A2R8YF97;A0A2R8YF50;O75140-2;A0A2R8YFS1;A0A2R8Y6Y2;A0A2R8Y5P2;H7C1T0;A0A2R8Y6F4;C9JGS4;A0A2R8Y7X0;A0A2R8YET0;H7C3I3;A0A2R8Y5V3	O75140;A0A2R8Y7U0;O75140-9;O75140-4;O75140-1;A0A2R8Y6H3;A0A2R8Y5K9;H0Y770;A0A2R8Y721;O75140-5;O75140-8;A0A5F9UWT1;A0A2R8Y6V4;A0A2R8YEW8;A0A2R8Y5T1;O75140-6;A0A2R8Y842;A0A2R8Y5E9;A0A2R8Y7U6;A0A2R8Y6H8;A0A2R8YF97;A0A2R8YF50	12;12;12;12;12;11;11;11;11;11;11;10;9;9;9;8;8;8;8;7;7;6;5;4;4;4;3;2;2;1;1;1;1	12;12;12;12;12;11;11;11;11;11;11;10;9;9;9;8;8;8;8;7;7;6;5;4;4;4;3;2;2;1;1;1;1	12;12;12;12;12;11;11;11;11;11;11;10;9;9;9;8;8;8;8;7;7;6;5;4;4;4;3;2;2;1;1;1;1	DEP domain-containing protein 5	DEPDC5	sp|O75140|DEPD5_HUMAN GATOR complex protein DEPDC5 OS=Homo sapiens OX=9606 GN=DEPDC5 PE=1 SV=2;tr|A0A2R8Y7U0|A0A2R8Y7U0_HUMAN GATOR complex protein DEPDC5 OS=Homo sapiens OX=9606 GN=DEPDC5 PE=1 SV=1;sp|O75140-9|DEPD5_HUMAN Isoform 9 of GATOR complex protei	33	12	12	12	1	0	0	0	0	0	9	0	0	0	4	0	1	0	0	0	0	0	9	0	0	0	4	0	1	0	0	0	0	0	9	0	0	0	4	0	10.1
421	P11171;P11171-2;P11171-5;A0A2R8YD30;P11171-6;A0A2U3TZH6;P11171-3;A0A3B3ITP0;A0A2R8Y7Y3;P11171-4;Q4VB86;A0A2R8YCW8;A0A3B3IU06;A0A2R8Y5Z6;A0A2R8Y5G2;A0A2R8Y570;A0A2R8Y783;A0A2R8Y6G5;A0A2R8Y4N6;A0A2R8YFR9;A0A2R8Y7N0;A0A2R8Y420;P11171-7;A0A3B3IUD6	P11171;P11171-2;P11171-5;A0A2R8YD30;P11171-6;A0A2U3TZH6;P11171-3;A0A3B3ITP0;A0A2R8Y7Y3;P11171-4;Q4VB86	3;3;3;3;3;3;3;3;3;3;3;1;1;1;1;1;1;1;1;1;1;1;1;1	3;3;3;3;3;3;3;3;3;3;3;1;1;1;1;1;1;1;1;1;1;1;1;1	3;3;3;3;3;3;3;3;3;3;3;1;1;1;1;1;1;1;1;1;1;1;1;1	Protein 4.1	EPB41	sp|P11171|41_HUMAN Protein 4.1 OS=Homo sapiens OX=9606 GN=EPB41 PE=1 SV=4;sp|P11171-2|41_HUMAN Isoform 2 of Protein 4.1 OS=Homo sapiens OX=9606 GN=EPB41;sp|P11171-5|41_HUMAN Isoform 5 of Protein 4.1 OS=Homo sapiens OX=9606 GN=EPB41;tr|A0A2R8YD30|A0A2R8YD30	24	3	3	3	0	0	1	0	1	1	0	0	0	0	0	0	0	0	1	0	1	1	0	0	0	0	0	0	0	0	1	0	1	1	0	0	0	0	0	0	4.5
422	Q8N8A2;A0A2R8Y7Y4;Q8N8A2-2;H7C209;Q8N8A2-4;H7C4A0;Q8N8A2-3;Q8N8A2-5	Q8N8A2;A0A2R8Y7Y4;Q8N8A2-2;H7C209;Q8N8A2-4	9;9;9;8;7;3;3;2	7;7;7;7;5;2;1;0	7;7;7;7;5;2;1;0	Serine/threonine-protein phosphatase 6 regulatory ankyrin repeat subunit B	ANKRD44	sp|Q8N8A2|ANR44_HUMAN Serine/threonine-protein phosphatase 6 regulatory ankyrin repeat subunit B OS=Homo sapiens OX=9606 GN=ANKRD44 PE=1 SV=3;tr|A0A2R8Y7Y4|A0A2R8Y7Y4_HUMAN Serine/threonine-protein phosphatase 6 regulatory ankyrin repeat subunit B OS=Homo	8	9	7	7	0	0	4	0	4	0	0	0	1	0	2	0	0	0	4	0	3	0	0	0	0	0	0	0	0	0	4	0	3	0	0	0	0	0	0	0	12
423	A0A2R8Y7Y9;P30043;M0QZL1;M0R192;A0A2R8YEP4	A0A2R8Y7Y9;P30043;M0QZL1;M0R192;A0A2R8YEP4	3;2;2;2;2	3;2;2;2;2	3;2;2;2;2	Flavin reductase (NADPH)	BLVRB	tr|A0A2R8Y7Y9|A0A2R8Y7Y9_HUMAN Flavin reductase (NADPH) OS=Homo sapiens OX=9606 GN=BLVRB PE=1 SV=1;sp|P30043|BLVRB_HUMAN Flavin reductase (NADPH) OS=Homo sapiens OX=9606 GN=BLVRB PE=1 SV=3;tr|M0QZL1|M0QZL1_HUMAN Flavin reductase (NADPH) OS=Homo sapiens OX=	5	3	3	3	3	0	0	0	0	0	0	0	0	0	0	0	3	0	0	0	0	0	0	0	0	0	0	0	3	0	0	0	0	0	0	0	0	0	0	0	45.5
424	P62263;A0A2R8Y811;E5RH77	P62263;A0A2R8Y811;E5RH77	15;15;12	15;15;12	15;15;12	40S ribosomal protein S14	RPS14	sp|P62263|RS14_HUMAN 40S ribosomal protein S14 OS=Homo sapiens OX=9606 GN=RPS14 PE=1 SV=3;tr|A0A2R8Y811|A0A2R8Y811_HUMAN 40S ribosomal protein S14 (Fragment) OS=Homo sapiens OX=9606 GN=RPS14 PE=1 SV=1;tr|E5RH77|E5RH77_HUMAN 40S ribosomal protein S14 OS=Hom	3	15	15	15	5	4	14	3	7	4	2	2	10	6	6	4	5	4	14	3	7	4	2	2	10	6	6	4	5	4	14	3	7	4	2	2	10	6	6	4	74.8
425	P62847;E7ETK0;A0A2R8Y849;A0A2R8YD14;P62847-2;P62847-3;P62847-4;A0A2R8Y8A0	P62847;E7ETK0;A0A2R8Y849;A0A2R8YD14;P62847-2;P62847-3;P62847-4;A0A2R8Y8A0	7;7;7;7;7;7;7;4	7;7;7;7;7;7;7;4	7;7;7;7;7;7;7;4	40S ribosomal protein S24	RPS24	sp|P62847|RS24_HUMAN 40S ribosomal protein S24 OS=Homo sapiens OX=9606 GN=RPS24 PE=1 SV=1;tr|E7ETK0|E7ETK0_HUMAN 40S ribosomal protein S24 OS=Homo sapiens OX=9606 GN=RPS24 PE=1 SV=1;tr|A0A2R8Y849|A0A2R8Y849_HUMAN 40S ribosomal protein S24 OS=Homo sapiens O	8	7	7	7	5	5	7	4	6	4	5	6	7	4	5	5	5	5	7	4	6	4	5	6	7	4	5	5	5	5	7	4	6	4	5	6	7	4	5	5	41.4
426	P62273;A0A2R8Y851;P62273-2	P62273;A0A2R8Y851;P62273-2	1;1;1	1;1;1	1;1;1	40S ribosomal protein S29	RPS29	sp|P62273|RS29_HUMAN 40S ribosomal protein S29 OS=Homo sapiens OX=9606 GN=RPS29 PE=1 SV=2;tr|A0A2R8Y851|A0A2R8Y851_HUMAN 40S ribosomal protein S29 OS=Homo sapiens OX=9606 GN=RPS29 PE=1 SV=1;sp|P62273-2|RS29_HUMAN Isoform 2 of 40S ribosomal protein S29 OS=H	3	1	1	1	1	1	0	0	1	1	0	1	0	1	0	1	1	1	0	0	1	1	0	1	0	1	0	1	1	1	0	0	1	1	0	1	0	1	0	1	19.6
427	Q969G3;Q969G3-2;A0A2R8Y855;A0A2R8Y7U4;B4DGM3;A0A2R8YES3;A0A2R8Y4T4;A0A2R8Y7I9;A0A2U3TZQ7;A0A2R8Y765;Q969G3-6;Q969G3-5;Q969G3-3;Q969G3-4;J3QKS7;J3QR61;A0A2R8YD78;J3KT85;J3QKX6;J3QL66;A0A2R8YDQ4	Q969G3;Q969G3-2;A0A2R8Y855;A0A2R8Y7U4;B4DGM3;A0A2R8YES3;A0A2R8Y4T4;A0A2R8Y7I9;A0A2U3TZQ7;A0A2R8Y765;Q969G3-6;Q969G3-5;Q969G3-3;Q969G3-4;J3QKS7;J3QR61	10;10;10;9;9;9;9;9;9;9;9;9;9;9;8;7;3;3;2;1;1	10;10;10;9;9;9;9;9;9;9;9;9;9;9;8;7;3;3;2;1;1	10;10;10;9;9;9;9;9;9;9;9;9;9;9;8;7;3;3;2;1;1	SWI/SNF-related matrix-associated actin-dependent regulator of chromatin subfamily E member 1	SMARCE1	sp|Q969G3|SMCE1_HUMAN SWI/SNF-related matrix-associated actin-dependent regulator of chromatin subfamily E member 1 OS=Homo sapiens OX=9606 GN=SMARCE1 PE=1 SV=2;sp|Q969G3-2|SMCE1_HUMAN Isoform 2 of SWI/SNF-related matrix-associated actin-dependent regulato	21	10	10	10	0	2	0	0	0	2	0	10	0	8	0	9	0	2	0	0	0	2	0	10	0	8	0	9	0	2	0	0	0	2	0	10	0	8	0	9	39.7
428	A0A2R8Y8D9	A0A2R8Y8D9	3	2	2			tr|A0A2R8Y8D9|A0A2R8Y8D9_HUMAN Proline and serine-rich protein 3 (Fragment) OS=Homo sapiens OX=9606 GN=PROSER3 PE=1 SV=1	1	3	2	2	0	0	0	0	0	0	2	0	0	0	3	0	0	0	0	0	0	0	2	0	0	0	2	0	0	0	0	0	0	0	2	0	0	0	2	0	9.2
429	O14773;A0A2R8YGD1;A0A2R8YD45;O14773-2;A0A2R8Y7U1;A0A2R8YDY1;A0A2R8Y7I4	O14773;A0A2R8YGD1;A0A2R8YD45;O14773-2;A0A2R8Y7U1	5;5;5;5;4;1;1	5;5;5;5;4;1;1	5;5;5;5;4;1;1	Tripeptidyl-peptidase 1	TPP1	sp|O14773|TPP1_HUMAN Tripeptidyl-peptidase 1 OS=Homo sapiens OX=9606 GN=TPP1 PE=1 SV=2;tr|A0A2R8YGD1|A0A2R8YGD1_HUMAN Tripeptidyl aminopeptidase OS=Homo sapiens OX=9606 GN=TPP1 PE=1 SV=1;tr|A0A2R8YD45|A0A2R8YD45_HUMAN Tripeptidyl aminopeptidase OS=Homo sap	7	5	5	5	0	0	3	3	0	0	0	0	4	3	0	0	0	0	3	3	0	0	0	0	4	3	0	0	0	0	3	3	0	0	0	0	4	3	0	0	15.5
430	P51659;A0A2R8YD50;P51659-3;P51659-2;E7ER27;E7ET17;A0A2R8Y7L2;E7EPL9;A0A2R8YDT8;A0A2R8YF45;A0A2R8YEG2;A0A2R8Y7W2	P51659;A0A2R8YD50;P51659-3;P51659-2;E7ER27;E7ET17;A0A2R8Y7L2;E7EPL9	24;24;21;21;17;16;15;14;9;8;2;2	24;24;21;21;17;16;15;14;9;8;2;2	24;24;21;21;17;16;15;14;9;8;2;2	Peroxisomal multifunctional enzyme type 2;(3R)-hydroxyacyl-CoA dehydrogenase;Enoyl-CoA hydratase 2	HSD17B4	sp|P51659|DHB4_HUMAN Peroxisomal multifunctional enzyme type 2 OS=Homo sapiens OX=9606 GN=HSD17B4 PE=1 SV=3;tr|A0A2R8YD50|A0A2R8YD50_HUMAN Peroxisomal multifunctional enzyme type 2 OS=Homo sapiens OX=9606 GN=HSD17B4 PE=1 SV=1;sp|P51659-3|DHB4_HUMAN Isoform	12	24	24	24	8	1	13	1	9	0	5	0	16	0	0	0	8	1	13	1	9	0	5	0	16	0	0	0	8	1	13	1	9	0	5	0	16	0	0	0	47.4
431	P68400;E7EU96;A0A2R8YD58;A0A2R8YF43;A0A2R8Y5A0;A0A2R8YFU2;Q8NEV1;A0A2R8YDP2;A0A2R8Y4H0;A0A2R8Y4D6;P68400-2;V9GYA2;A0A2R8YEW1;A0A2R8YDY7;A0A2R8YCK2;A0A2R8Y7T1;A0A2R8YF47;V9GY80;A0A2R8YEL7;A0A2R8Y797;A0A2R8Y3W6;A0A087WY74;V9GYW6;A0A2R8YCC9	P68400;E7EU96;A0A2R8YD58;A0A2R8YF43;A0A2R8Y5A0;A0A2R8YFU2;Q8NEV1;A0A2R8YDP2;A0A2R8Y4H0;A0A2R8Y4D6;P68400-2	17;17;17;16;16;14;13;13;10;10;9;8;7;7;5;4;4;4;4;4;4;3;1;1	17;17;17;16;16;14;13;13;10;10;9;8;7;7;5;4;4;4;4;4;4;3;1;1	17;17;17;16;16;14;13;13;10;10;9;8;7;7;5;4;4;4;4;4;4;3;1;1	Casein kinase II subunit alpha;Casein kinase II subunit alpha 3	CSNK2A1;CSNK2A3	sp|P68400|CSK21_HUMAN Casein kinase II subunit alpha OS=Homo sapiens OX=9606 GN=CSNK2A1 PE=1 SV=1;tr|E7EU96|E7EU96_HUMAN Casein kinase II subunit alpha OS=Homo sapiens OX=9606 GN=CSNK2A1 PE=1 SV=1;tr|A0A2R8YD58|A0A2R8YD58_HUMAN Casein kinase II subunit alp	24	17	17	17	0	1	14	0	4	0	1	0	9	0	8	0	0	1	14	0	4	0	1	0	9	0	8	0	0	1	14	0	4	0	1	0	9	0	8	0	52.2
432	Q9H0E3;H7BXF5;A0A2R8YDB8;Q9H0E3-3;Q9H0E3-2	Q9H0E3;H7BXF5;A0A2R8YDB8;Q9H0E3-3;Q9H0E3-2	5;5;5;5;3	5;5;5;5;3	5;5;5;5;3	Histone deacetylase complex subunit SAP130	SAP130	sp|Q9H0E3|SP130_HUMAN Histone deacetylase complex subunit SAP130 OS=Homo sapiens OX=9606 GN=SAP130 PE=1 SV=1;tr|H7BXF5|H7BXF5_HUMAN Histone deacetylase complex subunit SAP130 OS=Homo sapiens OX=9606 GN=SAP130 PE=1 SV=1;tr|A0A2R8YDB8|A0A2R8YDB8_HUMAN Histon	5	5	5	5	0	0	0	1	0	0	0	0	0	5	0	0	0	0	0	1	0	0	0	0	0	5	0	0	0	0	0	1	0	0	0	0	0	5	0	0	11.2
433	Q8NAN2;A0A2R8YFQ8;A0A2R8YDC7;A0A2R8YF99;A0A2R8YE40;A0A2R8YGK2;F8W7S1;Q8NAN2-2	Q8NAN2;A0A2R8YFQ8;A0A2R8YDC7;A0A2R8YF99;A0A2R8YE40;A0A2R8YGK2;F8W7S1;Q8NAN2-2	2;2;2;2;2;2;2;2	2;2;2;2;2;2;2;2	2;2;2;2;2;2;2;2	Protein FAM73A	FAM73A	sp|Q8NAN2|MIGA1_HUMAN Mitoguardin 1 OS=Homo sapiens OX=9606 GN=MIGA1 PE=1 SV=1;tr|A0A2R8YFQ8|A0A2R8YFQ8_HUMAN Mitoguardin 1 OS=Homo sapiens OX=9606 GN=MIGA1 PE=1 SV=1;tr|A0A2R8YDC7|A0A2R8YDC7_HUMAN Mitoguardin 1 OS=Homo sapiens OX=9606 GN=MIGA1 PE=1 SV=1;t	8	2	2	2	0	0	2	0	0	0	0	0	1	0	0	0	0	0	2	0	0	0	0	0	1	0	0	0	0	0	2	0	0	0	0	0	1	0	0	0	6
434	Q9BZD2;A0A2R8YDR8;Q9BZD2-2	Q9BZD2;A0A2R8YDR8;Q9BZD2-2	2;2;2	2;2;2	2;2;2	Equilibrative nucleoside transporter 3	SLC29A3	sp|Q9BZD2|S29A3_HUMAN Equilibrative nucleoside transporter 3 OS=Homo sapiens OX=9606 GN=SLC29A3 PE=1 SV=3;tr|A0A2R8YDR8|A0A2R8YDR8_HUMAN Equilibrative nucleoside transporter 3 OS=Homo sapiens OX=9606 GN=SLC29A3 PE=1 SV=1;sp|Q9BZD2-2|S29A3_HUMAN Isoform 2 o	3	2	2	2	0	0	2	0	0	0	0	0	0	0	0	0	0	0	2	0	0	0	0	0	0	0	0	0	0	0	2	0	0	0	0	0	0	0	0	0	5.1
435	P15104;A0A2R8YDT1	P15104;A0A2R8YDT1	7;7	7;7	7;7	Glutamine synthetase	GLUL	sp|P15104|GLNA_HUMAN Glutamine synthetase OS=Homo sapiens OX=9606 GN=GLUL PE=1 SV=4;tr|A0A2R8YDT1|A0A2R8YDT1_HUMAN Glutamine synthetase OS=Homo sapiens OX=9606 GN=GLUL PE=1 SV=1	2	7	7	7	2	0	0	0	4	0	1	0	0	0	4	0	2	0	0	0	4	0	1	0	0	0	4	0	2	0	0	0	4	0	1	0	0	0	4	0	23.9
436	Q12929;A0A2R8YE63;A0A2R8Y4W2;Q12929-2;F5H0R8;F5H3Q6;F5GYM8;F5H1B5;F5H2B8;H0YFG1	Q12929;A0A2R8YE63;A0A2R8Y4W2;Q12929-2	20;20;19;13;5;4;3;1;1;1	20;20;19;13;5;4;3;1;1;1	20;20;19;13;5;4;3;1;1;1	Epidermal growth factor receptor kinase substrate 8	EPS8	sp|Q12929|EPS8_HUMAN Epidermal growth factor receptor kinase substrate 8 OS=Homo sapiens OX=9606 GN=EPS8 PE=1 SV=1;tr|A0A2R8YE63|A0A2R8YE63_HUMAN Epidermal growth factor receptor kinase substrate 8 OS=Homo sapiens OX=9606 GN=EPS8 PE=1 SV=1;tr|A0A2R8Y4W2|A0	10	20	20	20	0	0	1	0	0	0	5	0	10	0	14	0	0	0	1	0	0	0	5	0	10	0	14	0	0	0	1	0	0	0	5	0	10	0	14	0	39.3
437	O14936;A0A2R8YE77;A0A2U3TZM1;O14936-3;A0A2U3TZM4;O14936-2;O14936-6;O14936-4;A0A2R8Y6F8;A0A2U3TZN6;A0A2R8YEK3;A0A2R8YFN5;A0A2R8Y3B3;Q5JS72;O14936-5;Q5JS79;A0A2R8YGH2;A0A2R8YEJ7;A0A2R8Y6D8;A0A2R8Y4K4;A0A2R8Y7X6	O14936;A0A2R8YE77;A0A2U3TZM1;O14936-3;A0A2U3TZM4;O14936-2;O14936-6;O14936-4;A0A2R8Y6F8;A0A2U3TZN6;A0A2R8YEK3;A0A2R8YFN5;A0A2R8Y3B3	12;12;12;12;11;11;11;11;11;11;10;10;7;5;5;4;3;3;3;1;1	12;12;12;12;11;11;11;11;11;11;10;10;7;5;5;4;3;3;3;1;1	12;12;12;12;11;11;11;11;11;11;10;10;7;5;5;4;3;3;3;1;1	Peripheral plasma membrane protein CASK	CASK	sp|O14936|CSKP_HUMAN Peripheral plasma membrane protein CASK OS=Homo sapiens OX=9606 GN=CASK PE=1 SV=3;tr|A0A2R8YE77|A0A2R8YE77_HUMAN Calcium/calmodulin-dependent serine protein kinase (MAGUK family), isoform CRA_c OS=Homo sapiens OX=9606 GN=CASK PE=1 SV=1	21	12	12	12	2	1	0	0	12	1	0	0	0	1	0	0	2	1	0	0	12	1	0	0	0	1	0	0	2	1	0	0	12	1	0	0	0	1	0	0	16.5
438	P48506;B4E2I4;E1CEI4;A0A2R8YEL6;A0A0C4DGB2;A0A2R8Y648	P48506;B4E2I4;E1CEI4;A0A2R8YEL6;A0A0C4DGB2;A0A2R8Y648	2;2;2;2;1;1	2;2;2;2;1;1	2;2;2;2;1;1	Glutamate--cysteine ligase catalytic subunit	GCLC	sp|P48506|GSH1_HUMAN Glutamate--cysteine ligase catalytic subunit OS=Homo sapiens OX=9606 GN=GCLC PE=1 SV=2;tr|B4E2I4|B4E2I4_HUMAN Gamma-ECS OS=Homo sapiens OX=9606 GN=GCLC PE=1 SV=1;tr|E1CEI4|E1CEI4_HUMAN Gamma-ECS OS=Homo sapiens OX=9606 GN=GCLC PE=1 SV=	6	2	2	2	2	0	0	0	2	0	0	0	0	0	0	0	2	0	0	0	2	0	0	0	0	0	0	0	2	0	0	0	2	0	0	0	0	0	0	0	2.8
439	A0A2R8YEX5	A0A2R8YEX5	5	1	1			tr|A0A2R8YEX5|A0A2R8YEX5_HUMAN Acetyl-coenzyme A transporter 1 OS=Homo sapiens OX=9606 GN=SLC33A1 PE=4 SV=1	1	5	1	1	0	0	2	0	1	0	0	0	1	0	1	0	0	0	0	0	1	0	0	0	0	0	0	0	0	0	0	0	1	0	0	0	0	0	0	0	30.9
440	Q96AX1;F5H6Y0;H3BMM5;A0A2R8YF87	Q96AX1;F5H6Y0;H3BMM5;A0A2R8YF87	4;4;4;4	4;4;4;4	4;4;4;4	Vacuolar protein sorting-associated protein 33A	VPS33A	sp|Q96AX1|VP33A_HUMAN Vacuolar protein sorting-associated protein 33A OS=Homo sapiens OX=9606 GN=VPS33A PE=1 SV=1;tr|F5H6Y0|F5H6Y0_HUMAN Vacuolar protein sorting-associated protein 33A OS=Homo sapiens OX=9606 GN=VPS33A PE=3 SV=1;tr|H3BMM5|H3BMM5_HUMAN Unch	4	4	4	4	0	0	4	0	0	0	0	0	1	0	0	0	0	0	4	0	0	0	0	0	1	0	0	0	0	0	4	0	0	0	0	0	1	0	0	0	5.9
441	Q8N302;A0A2R8YFF1;Q8N302-2;Q8N302-3	Q8N302;A0A2R8YFF1	3;3;1;1	3;3;1;1	3;3;1;1	Angiogenic factor with G patch and FHA domains 1	AGGF1	sp|Q8N302|AGGF1_HUMAN Angiogenic factor with G patch and FHA domains 1 OS=Homo sapiens OX=9606 GN=AGGF1 PE=1 SV=2;tr|A0A2R8YFF1|A0A2R8YFF1_HUMAN Uncharacterized protein (Fragment) OS=Homo sapiens OX=9606 PE=4 SV=1	4	3	3	3	0	0	3	0	0	0	0	0	0	0	0	0	0	0	3	0	0	0	0	0	0	0	0	0	0	0	3	0	0	0	0	0	0	0	0	0	6.7
442	A0A2R8YFL0;A0A2R8Y595;Q8NI51;Q8NI51-6;V9GY73;Q8NI51-2;Q8NI51-5;Q8NI51-11;Q8NI51-3;Q8NI51-7;Q8NI51-10;Q8NI51-8;A0A2R8Y6Z6;F5H2V8;A0A2R8Y6C1;V9GZ46;Q8NI51-9;V9GYX4;Q8NI51-4	A0A2R8YFL0;A0A2R8Y595	31;29;3;3;3;3;3;3;3;3;3;2;2;2;2;1;1;1;1	1;0;0;0;0;0;0;0;0;0;0;0;0;0;0;0;0;0;0	1;0;0;0;0;0;0;0;0;0;0;0;0;0;0;0;0;0;0			tr|A0A2R8YFL0|A0A2R8YFL0_HUMAN Transcriptional repressor CTCF OS=Homo sapiens OX=9606 GN=CTCF PE=1 SV=1;tr|A0A2R8Y595|A0A2R8Y595_HUMAN Transcriptional repressor CTCF OS=Homo sapiens OX=9606 GN=CTCF PE=1 SV=1	19	31	1	1	0	22	0	14	0	20	0	27	0	13	0	18	0	1	0	0	0	0	0	1	0	0	0	0	0	1	0	0	0	0	0	1	0	0	0	0	60.6
443	O00571;A0A2R8YFS5;A0A0D9SFB3;A0A2R8YF78;A0A0D9SG12;A0A2R8Y4A4;A0A0D9SF53;F6S8Q4;A0A2R8YDH3;A0A2R8YCU0;A0A087WVZ1;A0A2R8Y650;A0A087WX09;A0A2R8Y770	O00571;A0A2R8YFS5;A0A0D9SFB3;A0A2R8YF78;A0A0D9SG12;A0A2R8Y4A4;A0A0D9SF53;F6S8Q4;A0A2R8YDH3	51;51;50;50;50;50;50;47;42;10;10;10;5;2	50;50;49;49;49;49;49;46;41;10;10;10;5;2	1;1;1;1;1;1;1;1;1;1;0;1;1;1	ATP-dependent RNA helicase DDX3X	DDX3X	sp|O00571|DDX3X_HUMAN ATP-dependent RNA helicase DDX3X OS=Homo sapiens OX=9606 GN=DDX3X PE=1 SV=3;tr|A0A2R8YFS5|A0A2R8YFS5_HUMAN RNA helicase OS=Homo sapiens OX=9606 GN=DDX3X PE=1 SV=1;tr|A0A0D9SFB3|A0A0D9SFB3_HUMAN RNA helicase OS=Homo sapiens OX=9606 GN=	14	51	50	1	33	46	31	45	34	46	35	42	25	42	31	43	32	45	30	44	33	45	34	41	24	41	30	42	1	1	1	1	1	1	1	1	1	1	1	1	80.5
444	P61966;A0A2R8YGH5;H7C1E4	P61966;A0A2R8YGH5;H7C1E4	1;1;1	1;1;1	1;1;1	AP-1 complex subunit sigma-1A	AP1S1	sp|P61966|AP1S1_HUMAN AP-1 complex subunit sigma-1A OS=Homo sapiens OX=9606 GN=AP1S1 PE=1 SV=1;tr|A0A2R8YGH5|A0A2R8YGH5_HUMAN AP complex subunit sigma OS=Homo sapiens OX=9606 GN=AP1S1 PE=1 SV=1;tr|H7C1E4|H7C1E4_HUMAN AP-1 complex subunit sigma-1A (Fragment	3	1	1	1	0	0	1	0	1	0	0	0	0	0	0	0	0	0	1	0	1	0	0	0	0	0	0	0	0	0	1	0	1	0	0	0	0	0	0	0	10.1
445	Q5VWN6;A0A2R8YH03;Q5VWN6-2	Q5VWN6;A0A2R8YH03;Q5VWN6-2	35;35;26	35;35;26	35;35;26	Protein FAM208B	FAM208B	sp|Q5VWN6|TASO2_HUMAN Protein TASOR 2 OS=Homo sapiens OX=9606 GN=TASOR2 PE=1 SV=1;tr|A0A2R8YH03|A0A2R8YH03_HUMAN Protein TASOR 2 OS=Homo sapiens OX=9606 GN=TASOR2 PE=1 SV=1;sp|Q5VWN6-2|TASO2_HUMAN Isoform 2 of Protein TASOR 2 OS=Homo sapiens OX=9606 GN=TAS	3	35	35	35	0	26	0	8	0	21	0	11	0	3	0	14	0	26	0	8	0	21	0	11	0	3	0	14	0	26	0	8	0	21	0	11	0	3	0	14	20.7
446	Q05639;A0A2U3TZH3;A0A2R8Y488;A0A2R8Y660;A0A2R8YDN5	Q05639;A0A2U3TZH3;A0A2R8Y488;A0A2R8Y660	20;20;11;10;7	5;5;2;2;2	5;5;2;2;2	Elongation factor 1-alpha 2	EEF1A2	sp|Q05639|EF1A2_HUMAN Elongation factor 1-alpha 2 OS=Homo sapiens OX=9606 GN=EEF1A2 PE=1 SV=1;tr|A0A2U3TZH3|A0A2U3TZH3_HUMAN Elongation factor 1-alpha OS=Homo sapiens OX=9606 GN=EEF1A2 PE=1 SV=1;tr|A0A2R8Y488|A0A2R8Y488_HUMAN Elongation factor 1-alpha 2 (F	5	20	5	5	6	7	12	7	8	5	8	10	14	8	7	7	0	0	1	0	0	0	0	2	3	1	0	0	0	0	1	0	0	0	0	2	3	1	0	0	51.8
447	Q02241;Q02241-2;A0A2U3TZL8;H7BYN4;Q02241-3;H0YME6;A0A2R8Y531;H0YMJ4	Q02241;Q02241-2;A0A2U3TZL8;H7BYN4;Q02241-3	17;17;17;17;14;5;4;1	17;17;17;17;14;5;4;1	17;17;17;17;14;5;4;1	Kinesin-like protein KIF23;Kinesin-like protein	KIF23	sp|Q02241|KIF23_HUMAN Kinesin-like protein KIF23 OS=Homo sapiens OX=9606 GN=KIF23 PE=1 SV=3;sp|Q02241-2|KIF23_HUMAN Isoform 2 of Kinesin-like protein KIF23 OS=Homo sapiens OX=9606 GN=KIF23;tr|A0A2U3TZL8|A0A2U3TZL8_HUMAN Kinesin-like protein OS=Homo sapiens	8	17	17	17	0	10	0	10	0	9	0	12	0	12	0	13	0	10	0	10	0	9	0	12	0	12	0	13	0	10	0	10	0	9	0	12	0	12	0	13	27.6
448	P06744;A0A2U3TZU2;P06744-2;K7EQ48;A0A2R8Y6C7;A0A0J9YYH3;A0A0J9YXP8;A0A0J9YX90;K7EPY4;K7ERC6;K7EP41;CON__sp|P_Q3ZBD7|G6PI_BOVIN;P_Q3ZBD7;K7ENA0;A0A0J9YXM3;K7ELR7;A0A2R8YF08;K7ESF4;K7EIL4;K7ERK8;A0A0J9YXH9;A0A0J9YYI8	P06744;A0A2U3TZU2;P06744-2;K7EQ48;A0A2R8Y6C7;A0A0J9YYH3;A0A0J9YXP8;A0A0J9YX90	14;14;13;11;10;10;10;9;5;5;4;4;4;3;2;2;2;1;1;1;1;1	14;14;13;11;10;10;10;9;5;5;4;4;4;3;2;2;2;1;1;1;1;1	14;14;13;11;10;10;10;9;5;5;4;4;4;3;2;2;2;1;1;1;1;1	Glucose-6-phosphate isomerase	GPI	sp|P06744|G6PI_HUMAN Glucose-6-phosphate isomerase OS=Homo sapiens OX=9606 GN=GPI PE=1 SV=4;tr|A0A2U3TZU2|A0A2U3TZU2_HUMAN Glucose-6-phosphate isomerase OS=Homo sapiens OX=9606 GN=GPI PE=1 SV=1;sp|P06744-2|G6PI_HUMAN Isoform 2 of Glucose-6-phosphate isomer	22	14	14	14	11	0	7	0	4	0	0	0	0	0	0	0	11	0	7	0	4	0	0	0	0	0	0	0	11	0	7	0	4	0	0	0	0	0	0	0	37.5
449	Q719H9;Q4G0X4;E9PK99;E9PMS5;E9PRT1;E9PJJ5;J3KSG1;J3QRK1;A0A2U3U043	Q719H9;Q4G0X4;E9PK99;E9PMS5;E9PRT1;E9PJJ5;J3KSG1;J3QRK1;A0A2U3U043	1;1;1;1;1;1;1;1;1	1;1;1;1;1;1;1;1;1	1;1;1;1;1;1;1;1;1	BTB/POZ domain-containing protein KCTD1;BTB/POZ domain-containing protein KCTD21	KCTD1;KCTD21	sp|Q719H9|KCTD1_HUMAN BTB/POZ domain-containing protein KCTD1 OS=Homo sapiens OX=9606 GN=KCTD1 PE=1 SV=1;sp|Q4G0X4|KCD21_HUMAN BTB/POZ domain-containing protein KCTD21 OS=Homo sapiens OX=9606 GN=KCTD21 PE=1 SV=1;tr|E9PK99|E9PK99_HUMAN BTB/POZ domain-contai	9	1	1	1	1	0	0	0	1	0	0	0	0	0	1	0	1	0	0	0	1	0	0	0	0	0	1	0	1	0	0	0	1	0	0	0	0	0	1	0	2.7
450	P56556;A0A2Y9D025;R4GN43	P56556;A0A2Y9D025;R4GN43	4;4;2	4;4;2	4;4;2	NADH dehydrogenase [ubiquinone] 1 alpha subcomplex subunit 6	NDUFA6	sp|P56556|NDUA6_HUMAN NADH dehydrogenase [ubiquinone] 1 alpha subcomplex subunit 6 OS=Homo sapiens OX=9606 GN=NDUFA6 PE=1 SV=4;tr|A0A2Y9D025|A0A2Y9D025_HUMAN Complex I-B14 OS=Homo sapiens OX=9606 GN=NDUFA6 PE=1 SV=1;tr|R4GN43|R4GN43_HUMAN Complex I-B14 OS=	3	4	4	4	2	1	4	0	1	0	0	0	1	0	0	0	2	1	4	0	1	0	0	0	1	0	0	0	2	1	4	0	1	0	0	0	1	0	0	0	39.8
451	Q8IY17;Q8IY17-2;A0A384DVU0;Q8IY17-3;Q8IY17-5;M0R2C2;M0QYT1;Q6ZV29-3;Q6ZV29-2;Q6ZV29-4;M0QXH7;M0R2H4;Q6ZV29-5;Q6ZV29;M0QZK5;M0R2K2;M0QYF5	Q8IY17;Q8IY17-2;A0A384DVU0;Q8IY17-3;Q8IY17-5	14;14;14;14;13;4;3;1;1;1;1;1;1;1;1;1;1	14;14;14;14;13;4;3;1;1;1;1;1;1;1;1;1;1	14;14;14;14;13;4;3;1;1;1;1;1;1;1;1;1;1	Neuropathy target esterase	PNPLA6	sp|Q8IY17|PLPL6_HUMAN Patatin-like phospholipase domain-containing protein 6 OS=Homo sapiens OX=9606 GN=PNPLA6 PE=1 SV=3;sp|Q8IY17-2|PLPL6_HUMAN Isoform 2 of Patatin-like phospholipase domain-containing protein 6 OS=Homo sapiens OX=9606 GN=PNPLA6;tr|A0A384	17	14	14	14	0	0	10	0	0	0	0	0	7	0	0	1	0	0	10	0	0	0	0	0	7	0	0	1	0	0	10	0	0	0	0	0	7	0	0	1	17.6
452	V9GYY3;A0A384N5Y3;F5H2F4;V9GZ78;A0A494C1T2;V9GY75	V9GYY3;A0A384N5Y3;F5H2F4;V9GZ78;A0A494C1T2	45;45;45;39;28;3	45;45;45;39;28;3	2;2;2;2;0;2		MTHFD1	tr|V9GYY3|V9GYY3_HUMAN C-1-tetrahydrofolate synthase, cytoplasmic OS=Homo sapiens OX=9606 GN=MTHFD1 PE=1 SV=2;tr|A0A384N5Y3|A0A384N5Y3_HUMAN C-1-tetrahydrofolate synthase, cytoplasmic OS=Homo sapiens OX=9606 GN=MTHFD1 PE=1 SV=1;tr|F5H2F4|F5H2F4_HUMAN C-1-t	6	45	45	2	36	0	6	2	36	0	35	0	19	4	32	0	36	0	6	2	36	0	35	0	19	4	32	0	2	0	0	0	2	0	0	0	0	0	0	0	65.2
453	Q03591;A0A3B3ISW6;V9GYE7;B1AKG0;A0A3B3IQ51;P36980-2;P36980	Q03591;A0A3B3ISW6;V9GYE7;B1AKG0;A0A3B3IQ51;P36980-2;P36980	1;1;1;1;1;1;1	1;1;1;1;1;1;1	1;1;1;1;1;1;1	Complement factor H-related protein 1;Complement factor H-related protein 2	CFHR1;CFHR2	sp|Q03591|FHR1_HUMAN Complement factor H-related protein 1 OS=Homo sapiens OX=9606 GN=CFHR1 PE=1 SV=2;tr|A0A3B3ISW6|A0A3B3ISW6_HUMAN Complement factor H-related protein 2 (Fragment) OS=Homo sapiens OX=9606 GN=CFHR2 PE=1 SV=1;tr|V9GYE7|V9GYE7_HUMAN Compleme	7	1	1	1	1	0	0	0	0	0	0	0	0	0	0	0	1	0	0	0	0	0	0	0	0	0	0	0	1	0	0	0	0	0	0	0	0	0	0	0	3.3
454	P17812;A0A3B3IRI2;B4E1E0;P17812-2;A0A3B3IRQ8;A0A3B3ITF6;A0A3B3ITB8;A0A3B3ISY3;A0A3B3ITH9	P17812;A0A3B3IRI2;B4E1E0;P17812-2;A0A3B3IRQ8;A0A3B3ITF6	16;16;13;13;9;9;6;2;2	16;16;13;13;9;9;6;2;2	14;14;12;12;7;7;4;1;1	CTP synthase 1;CTP synthase	CTPS1	sp|P17812|PYRG1_HUMAN CTP synthase 1 OS=Homo sapiens OX=9606 GN=CTPS1 PE=1 SV=2;tr|A0A3B3IRI2|A0A3B3IRI2_HUMAN CTP synthase OS=Homo sapiens OX=9606 GN=CTPS1 PE=1 SV=1;tr|B4E1E0|B4E1E0_HUMAN CTP synthase OS=Homo sapiens OX=9606 GN=CTPS1 PE=1 SV=1;sp|P17812-	9	16	16	14	2	0	7	1	12	1	2	0	5	1	9	0	2	0	7	1	12	1	2	0	5	1	9	0	2	0	7	1	10	1	1	0	5	1	8	0	39.3
455	Q9BYX4;A0A3B3IRK8	Q9BYX4;A0A3B3IRK8	1;1	1;1	1;1	Interferon-induced helicase C domain-containing protein 1	IFIH1	sp|Q9BYX4|IFIH1_HUMAN Interferon-induced helicase C domain-containing protein 1 OS=Homo sapiens OX=9606 GN=IFIH1 PE=1 SV=3;tr|A0A3B3IRK8|A0A3B3IRK8_HUMAN RNA helicase OS=Homo sapiens OX=9606 GN=IFIH1 PE=1 SV=1	2	1	1	1	0	0	1	0	0	0	0	0	1	0	0	0	0	0	1	0	0	0	0	0	1	0	0	0	0	0	1	0	0	0	0	0	1	0	0	0	0.9
456	O75629;A0A3B3IRL2	O75629;A0A3B3IRL2	1;1	1;1	1;1	Protein CREG1	CREG1	sp|O75629|CREG1_HUMAN Protein CREG1 OS=Homo sapiens OX=9606 GN=CREG1 PE=1 SV=1;tr|A0A3B3IRL2|A0A3B3IRL2_HUMAN Cellular repressor of E1A-stimulated genes 1, isoform CRA_a OS=Homo sapiens OX=9606 GN=CREG1 PE=1 SV=1	2	1	1	1	1	0	0	0	0	0	0	0	0	0	0	0	1	0	0	0	0	0	0	0	0	0	0	0	1	0	0	0	0	0	0	0	0	0	0	0	9.5
457	A0A3B3IRR3;Q9HCM7	A0A3B3IRR3;Q9HCM7	8;7	8;7	8;7	Fibrosin-1-like protein	FBRSL1	tr|A0A3B3IRR3|A0A3B3IRR3_HUMAN Fibrosin-1-like protein OS=Homo sapiens OX=9606 GN=FBRSL1 PE=1 SV=1;sp|Q9HCM7|FBSL_HUMAN Fibrosin-1-like protein OS=Homo sapiens OX=9606 GN=FBRSL1 PE=1 SV=4	2	8	8	8	3	0	0	0	2	0	8	0	0	0	4	0	3	0	0	0	2	0	8	0	0	0	4	0	3	0	0	0	2	0	8	0	0	0	4	0	15
458	Q9NUN5;A0A3B3IRS7;A0A3B3IU68;A0A3F2YP66;A0A3B3ITP2;A0A3B3IT31;Q9NUN5-4;Q9NUN5-2;Q9NUN5-3	Q9NUN5;A0A3B3IRS7;A0A3B3IU68;A0A3F2YP66;A0A3B3ITP2;A0A3B3IT31;Q9NUN5-4;Q9NUN5-2;Q9NUN5-3	1;1;1;1;1;1;1;1;1	1;1;1;1;1;1;1;1;1	1;1;1;1;1;1;1;1;1	Probable lysosomal cobalamin transporter	LMBRD1	sp|Q9NUN5|LMBD1_HUMAN Lysosomal cobalamin transport escort protein LMBD1 OS=Homo sapiens OX=9606 GN=LMBRD1 PE=1 SV=1;tr|A0A3B3IRS7|A0A3B3IRS7_HUMAN Lysosomal cobalamin transport escort protein LMBD1 OS=Homo sapiens OX=9606 GN=LMBRD1 PE=1 SV=1;tr|A0A3B3IU68	9	1	1	1	0	0	0	0	0	0	0	0	1	0	0	0	0	0	0	0	0	0	0	0	1	0	0	0	0	0	0	0	0	0	0	0	1	0	0	0	3.3
459	P43307;A0A3B3IRT8;C9J3L8;C9J5W0;E9PAL7;C9IZQ1;P43307-2;C9JBX5;C9JY01	P43307;A0A3B3IRT8;C9J3L8;C9J5W0;E9PAL7;C9IZQ1;P43307-2	7;7;6;6;6;6;6;2;1	7;7;6;6;6;6;6;2;1	7;7;6;6;6;6;6;2;1	Translocon-associated protein subunit alpha	SSR1	sp|P43307|SSRA_HUMAN Translocon-associated protein subunit alpha OS=Homo sapiens OX=9606 GN=SSR1 PE=1 SV=3;tr|A0A3B3IRT8|A0A3B3IRT8_HUMAN Signal sequence receptor subunit alpha OS=Homo sapiens OX=9606 GN=SSR1 PE=1 SV=1;tr|C9J3L8|C9J3L8_HUMAN Signal sequenc	9	7	7	7	2	1	6	2	2	0	0	1	7	2	1	1	2	1	6	2	2	0	0	1	7	2	1	1	2	1	6	2	2	0	0	1	7	2	1	1	42.3
460	Q2KHR3;A0A3B3IRW6;Q2KHR3-2	Q2KHR3;A0A3B3IRW6;Q2KHR3-2	3;3;3	3;3;3	3;3;3	Glutamine and serine-rich protein 1	QSER1	sp|Q2KHR3|QSER1_HUMAN Glutamine and serine-rich protein 1 OS=Homo sapiens OX=9606 GN=QSER1 PE=1 SV=3;tr|A0A3B3IRW6|A0A3B3IRW6_HUMAN Glutamine and serine-rich protein 1 OS=Homo sapiens OX=9606 GN=QSER1 PE=1 SV=1;sp|Q2KHR3-2|QSER1_HUMAN Isoform 2 of Glutamin	3	3	3	3	2	0	0	0	1	0	0	0	0	0	0	0	2	0	0	0	1	0	0	0	0	0	0	0	2	0	0	0	1	0	0	0	0	0	0	0	4
461	Q71F56;A0A3B3IS46;A0A3B3IRX3;H0YHC1;F8VRB8;A0A3B3IRS4	Q71F56;A0A3B3IS46;A0A3B3IRX3;H0YHC1	11;11;11;8;4;2	11;11;11;8;4;2	11;11;11;8;4;2	Mediator of RNA polymerase II transcription subunit 13-like	MED13L	sp|Q71F56|MD13L_HUMAN Mediator of RNA polymerase II transcription subunit 13-like OS=Homo sapiens OX=9606 GN=MED13L PE=1 SV=1;tr|A0A3B3IS46|A0A3B3IS46_HUMAN Mediator of RNA polymerase II transcription subunit 13 (Fragment) OS=Homo sapiens OX=9606 GN=MED13L	6	11	11	11	0	6	0	8	0	8	0	1	0	0	0	2	0	6	0	8	0	8	0	1	0	0	0	2	0	6	0	8	0	8	0	1	0	0	0	2	9.6
462	Q9UGL1;B3KV94;A0A3B3ISE6;A0A3B3ITA8;A0A3B3ITJ7;A0A3B3ITE7;A0A3B3IT25;A0A3B3IS40;Q9UGL1-2;A0A3B3ITJ3;A0A3B3IS31;A0A3B3IT85	Q9UGL1;B3KV94;A0A3B3ISE6;A0A3B3ITA8;A0A3B3ITJ7;A0A3B3ITE7;A0A3B3IT25;A0A3B3IS40;Q9UGL1-2;A0A3B3ITJ3;A0A3B3IS31;A0A3B3IT85	2;2;2;2;2;2;2;2;2;1;1;1	2;2;2;2;2;2;2;2;2;1;1;1	2;2;2;2;2;2;2;2;2;1;1;1	Lysine-specific demethylase 5B	KDM5B	sp|Q9UGL1|KDM5B_HUMAN Lysine-specific demethylase 5B OS=Homo sapiens OX=9606 GN=KDM5B PE=1 SV=3;tr|B3KV94|B3KV94_HUMAN Jumonji, AT rich interactive domain 1B (RBP2-like), isoform CRA_a (Fragment) OS=Homo sapiens OX=9606 GN=KDM5B PE=1 SV=1;tr|A0A3B3ISE6|A0A	12	2	2	2	0	0	0	0	0	0	0	0	0	2	0	0	0	0	0	0	0	0	0	0	0	2	0	0	0	0	0	0	0	0	0	0	0	2	0	0	1.8
463	P06400;A0A3B3IS71	P06400;A0A3B3IS71	4;4	4;4	4;4	Retinoblastoma-associated protein	RB1	sp|P06400|RB_HUMAN Retinoblastoma-associated protein OS=Homo sapiens OX=9606 GN=RB1 PE=1 SV=2;tr|A0A3B3IS71|A0A3B3IS71_HUMAN Retinoblastoma-associated protein OS=Homo sapiens OX=9606 GN=RB1 PE=1 SV=1	2	4	4	4	1	1	2	2	1	1	0	0	1	0	0	1	1	1	2	2	1	1	0	0	1	0	0	1	1	1	2	2	1	1	0	0	1	0	0	1	6
464	A0A3B3ISF0;Q659C4;Q659C4-2;Q659C4-9;A0A3B3IT29;A0A3B3ISF8;D6RJB0;Q659C4-7;Q659C4-6;Q659C4-5;G3V0E9;H0Y9K3;D6R9W6;Q659C4-3;Q659C4-4	A0A3B3ISF0;Q659C4;Q659C4-2;Q659C4-9;A0A3B3IT29;A0A3B3ISF8	14;11;10;9;7;7;5;5;5;5;4;4;4;4;1	10;7;6;6;7;7;5;1;1;1;4;4;4;4;1	10;7;6;6;7;7;5;1;1;1;4;4;4;4;1	La-related protein 1B	LARP1B	tr|A0A3B3ISF0|A0A3B3ISF0_HUMAN La-related protein 1B OS=Homo sapiens OX=9606 GN=LARP1B PE=1 SV=1;sp|Q659C4|LAR1B_HUMAN La-related protein 1B OS=Homo sapiens OX=9606 GN=LARP1B PE=1 SV=2;sp|Q659C4-2|LAR1B_HUMAN Isoform 2 of La-related protein 1B OS=Homo sapi	15	14	10	10	2	0	9	0	3	0	1	0	8	0	5	0	0	0	6	0	0	0	0	0	5	0	1	0	0	0	6	0	0	0	0	0	5	0	1	0	19.8
465	P14735;A0A3B3ISG5;P14735-2	P14735;A0A3B3ISG5;P14735-2	9;9;5	9;9;5	9;9;5	Insulin-degrading enzyme	IDE	sp|P14735|IDE_HUMAN Insulin-degrading enzyme OS=Homo sapiens OX=9606 GN=IDE PE=1 SV=4;tr|A0A3B3ISG5|A0A3B3ISG5_HUMAN Insulin-degrading enzyme OS=Homo sapiens OX=9606 GN=IDE PE=1 SV=1;sp|P14735-2|IDE_HUMAN Isoform 2 of Insulin-degrading enzyme OS=Homo sapie	3	9	9	9	1	0	0	0	7	0	1	0	0	0	3	0	1	0	0	0	7	0	1	0	0	0	3	0	1	0	0	0	7	0	1	0	0	0	3	0	8.9
466	Q92625;A0A3B3ISP1;A0A3B3ITU5;Q92625-2	Q92625;A0A3B3ISP1	27;27;11;7	27;27;11;7	27;27;11;7	Ankyrin repeat and SAM domain-containing protein 1A	ANKS1A	sp|Q92625|ANS1A_HUMAN Ankyrin repeat and SAM domain-containing protein 1A OS=Homo sapiens OX=9606 GN=ANKS1A PE=1 SV=4;tr|A0A3B3ISP1|A0A3B3ISP1_HUMAN Ankyrin repeat and SAM domain-containing protein 1A OS=Homo sapiens OX=9606 GN=ANKS1A PE=1 SV=1	4	27	27	27	1	0	0	0	7	0	15	0	5	0	24	0	1	0	0	0	7	0	15	0	5	0	24	0	1	0	0	0	7	0	15	0	5	0	24	0	36.6
467	Q8NHY2;A0A3B3ISQ9;Q8NHY2-5;Q8NHY2-2;Q8NHY2-4	Q8NHY2;A0A3B3ISQ9;Q8NHY2-5;Q8NHY2-2;Q8NHY2-4	1;1;1;1;1	1;1;1;1;1	1;1;1;1;1	E3 ubiquitin-protein ligase RFWD2	RFWD2	sp|Q8NHY2|COP1_HUMAN E3 ubiquitin-protein ligase COP1 OS=Homo sapiens OX=9606 GN=COP1 PE=1 SV=1;tr|A0A3B3ISQ9|A0A3B3ISQ9_HUMAN E3 ubiquitin-protein ligase COP1 (Fragment) OS=Homo sapiens OX=9606 GN=COP1 PE=1 SV=1;sp|Q8NHY2-5|COP1_HUMAN Isoform 5 of E3 ubiq	5	1	1	1	0	0	0	0	0	0	0	0	0	0	1	0	0	0	0	0	0	0	0	0	0	0	1	0	0	0	0	0	0	0	0	0	0	0	1	0	2.3
468	P42858;A0A3B3ISR3	P42858;A0A3B3ISR3	1;1	1;1	1;1	Huntingtin	HTT	sp|P42858|HD_HUMAN Huntingtin OS=Homo sapiens OX=9606 GN=HTT PE=1 SV=2;tr|A0A3B3ISR3|A0A3B3ISR3_HUMAN Huntingtin (Fragment) OS=Homo sapiens OX=9606 GN=HTT PE=1 SV=1	2	1	1	1	0	0	0	0	0	0	0	0	1	0	0	0	0	0	0	0	0	0	0	0	1	0	0	0	0	0	0	0	0	0	0	0	1	0	0	0	0.5
469	Q05084;C9J3Y4;B9ZVM7;Q6LCR0;E7ENI6;E9PDL4;A0A3B3IST8;Q05084-3;Q05084-2	Q05084;C9J3Y4;B9ZVM7;Q6LCR0;E7ENI6;E9PDL4;A0A3B3IST8;Q05084-3;Q05084-2	1;1;1;1;1;1;1;1;1	1;1;1;1;1;1;1;1;1	1;1;1;1;1;1;1;1;1	Islet cell autoantigen 1	ICA1	sp|Q05084|ICA69_HUMAN Islet cell autoantigen 1 OS=Homo sapiens OX=9606 GN=ICA1 PE=1 SV=2;tr|C9J3Y4|C9J3Y4_HUMAN Islet cell autoantigen 1 (Fragment) OS=Homo sapiens OX=9606 GN=ICA1 PE=1 SV=1;tr|B9ZVM7|B9ZVM7_HUMAN Islet cell autoantigen 1 (Fragment) OS=Homo	9	1	1	1	0	0	0	0	0	0	1	0	0	0	0	0	0	0	0	0	0	0	1	0	0	0	0	0	0	0	0	0	0	0	1	0	0	0	0	0	1.9
470	P02462;A0A3B3ISV3;P29400;P29400-2	P02462;A0A3B3ISV3;P29400;P29400-2	2;2;1;1	2;2;1;1	2;2;1;1	Collagen alpha-1(IV) chain;Arresten;Collagen alpha-5(IV) chain	COL4A1;COL4A5	sp|P02462|CO4A1_HUMAN Collagen alpha-1(IV) chain OS=Homo sapiens OX=9606 GN=COL4A1 PE=1 SV=4;tr|A0A3B3ISV3|A0A3B3ISV3_HUMAN Collagen alpha-1(IV) chain (Fragment) OS=Homo sapiens OX=9606 GN=COL4A1 PE=1 SV=1;sp|P29400|CO4A5_HUMAN Collagen alpha-5(IV) chain O	4	2	2	2	2	0	0	0	2	0	0	0	0	0	0	0	2	0	0	0	2	0	0	0	0	0	0	0	2	0	0	0	2	0	0	0	0	0	0	0	1.8
471	Q8N0U8;A0A3B3ISV4;Q8N0U8-2	Q8N0U8;A0A3B3ISV4;Q8N0U8-2	4;4;2	4;4;2	4;4;2	Vitamin K epoxide reductase complex subunit 1-like protein 1	VKORC1L1	sp|Q8N0U8|VKORL_HUMAN Vitamin K epoxide reductase complex subunit 1-like protein 1 OS=Homo sapiens OX=9606 GN=VKORC1L1 PE=1 SV=2;tr|A0A3B3ISV4|A0A3B3ISV4_HUMAN Vitamin-K-epoxide reductase (warfarin-sensitive) OS=Homo sapiens OX=9606 GN=VKORC1L1 PE=1 SV=1;s	3	4	4	4	1	1	2	0	1	0	0	0	3	0	0	0	1	1	2	0	1	0	0	0	3	0	0	0	1	1	2	0	1	0	0	0	3	0	0	0	21.6
472	Q96E14;A0A3B3ISX4;I3L2E0	Q96E14;A0A3B3ISX4	4;4;1	4;4;1	4;4;1	RecQ-mediated genome instability protein 2	RMI2	sp|Q96E14|RMI2_HUMAN RecQ-mediated genome instability protein 2 OS=Homo sapiens OX=9606 GN=RMI2 PE=1 SV=2;tr|A0A3B3ISX4|A0A3B3ISX4_HUMAN RecQ-mediated genome instability protein 2 OS=Homo sapiens OX=9606 GN=RMI2 PE=1 SV=1	3	4	4	4	0	2	0	1	2	4	0	2	1	2	2	4	0	2	0	1	2	4	0	2	1	2	2	4	0	2	0	1	2	4	0	2	1	2	2	4	33.3
473	P33991;A0A3B3IU45;A0A3B3IT92;E5RG31;A0A3B3ITP6;A0A3B3IS57;A0A3B3IRR8	P33991;A0A3B3IU45;A0A3B3IT92;E5RG31;A0A3B3ITP6;A0A3B3IS57	13;13;13;12;11;11;3	13;13;13;12;11;11;3	13;13;13;12;11;11;3	DNA replication licensing factor MCM4	MCM4	sp|P33991|MCM4_HUMAN DNA replication licensing factor MCM4 OS=Homo sapiens OX=9606 GN=MCM4 PE=1 SV=5;tr|A0A3B3IU45|A0A3B3IU45_HUMAN DNA helicase OS=Homo sapiens OX=9606 GN=MCM4 PE=1 SV=1;tr|A0A3B3IT92|A0A3B3IT92_HUMAN DNA helicase OS=Homo sapiens OX=9606 G	7	13	13	13	0	3	9	4	0	2	0	0	6	4	0	0	0	3	9	4	0	2	0	0	6	4	0	0	0	3	9	4	0	2	0	0	6	4	0	0	22.9
474	Q96LT4;Q5JSC9;A0A3B3IT94;A0A5F9ZGS6;Q96LT4-2	Q96LT4;Q5JSC9;A0A3B3IT94;A0A5F9ZGS6;Q96LT4-2	1;1;1;1;1	1;1;1;1;1	1;1;1;1;1	Sphingomyelin synthase-related protein 1	SAMD8	sp|Q96LT4|SAMD8_HUMAN Sphingomyelin synthase-related protein 1 OS=Homo sapiens OX=9606 GN=SAMD8 PE=1 SV=2;tr|Q5JSC9|Q5JSC9_HUMAN Sphingomyelin synthase-related protein 1 (Fragment) OS=Homo sapiens OX=9606 GN=SAMD8 PE=1 SV=8;tr|A0A3B3IT94|A0A3B3IT94_HUMAN S	5	1	1	1	0	0	1	0	0	0	0	0	0	0	0	0	0	0	1	0	0	0	0	0	0	0	0	0	0	0	1	0	0	0	0	0	0	0	0	0	3.6
475	A0A3B3ITJ4;M0R1W6;B4DVF8;M0QYL7;M0R076	A0A3B3ITJ4	33;9;7;7;4	4;0;0;0;0	4;0;0;0;0			tr|A0A3B3ITJ4|A0A3B3ITJ4_HUMAN Heterogeneous nuclear ribonucleoprotein L (Fragment) OS=Homo sapiens OX=9606 GN=HNRNPL PE=1 SV=1	5	33	4	4	1	29	6	31	0	29	1	30	9	29	0	31	0	4	0	4	0	3	0	4	0	3	0	4	0	4	0	4	0	3	0	4	0	3	0	4	88.1
476	O95363;A0A3B3ITR6;Q5JRF7	O95363;A0A3B3ITR6	8;8;2	8;8;2	8;8;2	Phenylalanine--tRNA ligase, mitochondrial	FARS2	sp|O95363|SYFM_HUMAN Phenylalanine--tRNA ligase, mitochondrial OS=Homo sapiens OX=9606 GN=FARS2 PE=1 SV=1;tr|A0A3B3ITR6|A0A3B3ITR6_HUMAN Phenylalanyl-tRNA synthetase OS=Homo sapiens OX=9606 GN=FARS2 PE=1 SV=1	3	8	8	8	0	0	1	0	3	0	1	0	3	0	5	0	0	0	1	0	3	0	1	0	3	0	5	0	0	0	1	0	3	0	1	0	3	0	5	0	22.8
477	Q14181;E9PIQ6;A0A3B3ITS5	Q14181;E9PIQ6;A0A3B3ITS5	1;1;1	1;1;1	1;1;1	DNA polymerase alpha subunit B	POLA2	sp|Q14181|DPOA2_HUMAN DNA polymerase alpha subunit B OS=Homo sapiens OX=9606 GN=POLA2 PE=1 SV=2;tr|E9PIQ6|E9PIQ6_HUMAN DNA polymerase alpha subunit B (Fragment) OS=Homo sapiens OX=9606 GN=POLA2 PE=1 SV=1;tr|A0A3B3ITS5|A0A3B3ITS5_HUMAN DNA polymerase alpha	3	1	1	1	0	0	1	0	0	0	0	0	0	0	0	0	0	0	1	0	0	0	0	0	0	0	0	0	0	0	1	0	0	0	0	0	0	0	0	0	3
478	P47914;A0A3B3ITT5	P47914;A0A3B3ITT5	2;2	2;2	2;2	60S ribosomal protein L29	RPL29	sp|P47914|RL29_HUMAN 60S ribosomal protein L29 OS=Homo sapiens OX=9606 GN=RPL29 PE=1 SV=2;tr|A0A3B3ITT5|A0A3B3ITT5_HUMAN 60S ribosomal protein L29 OS=Homo sapiens OX=9606 GN=RPL29 PE=1 SV=1	2	2	2	2	2	1	1	1	2	1	1	1	1	1	1	1	2	1	1	1	2	1	1	1	1	1	1	1	2	1	1	1	2	1	1	1	1	1	1	1	14.5
479	Q14643;Q14643-8;A0A3F2YNW8;A0A3B3IU04;Q14643-6;Q14643-2;A0A3B3ITU8;Q14643-5;Q14643-7;Q14643-3;Q14643-4;A0A3B3ITQ1;A0A3B3IU05;A0A3B3IU13;A0A3B3IRP0;B7ZMI3;A0A3B3ITQ4;A0A3B3ITM1	Q14643;Q14643-8;A0A3F2YNW8;A0A3B3IU04;Q14643-6;Q14643-2;A0A3B3ITU8;Q14643-5;Q14643-7;Q14643-3;Q14643-4;A0A3B3ITQ1;A0A3B3IU05;A0A3B3IU13;A0A3B3IRP0	6;6;6;6;6;6;6;6;6;6;6;5;5;5;5;1;1;1	2;2;2;2;2;2;2;2;2;2;2;1;1;1;1;0;0;0	1;1;1;1;1;1;1;1;1;1;1;1;1;1;1;0;0;0	Inositol 1,4,5-trisphosphate receptor type 1	ITPR1	sp|Q14643|ITPR1_HUMAN Inositol 1,4,5-trisphosphate receptor type 1 OS=Homo sapiens OX=9606 GN=ITPR1 PE=1 SV=3;sp|Q14643-8|ITPR1_HUMAN Isoform 8 of Inositol 1,4,5-trisphosphate receptor type 1 OS=Homo sapiens OX=9606 GN=ITPR1;tr|A0A3F2YNW8|A0A3F2YNW8_HUMAN	18	6	2	1	0	0	4	0	0	0	0	0	1	2	1	0	0	0	2	0	0	0	0	0	0	0	0	0	0	0	1	0	0	0	0	0	0	0	0	0	2.4
480	O75964;E9PN17;A0A3B3ITX4	O75964;E9PN17;A0A3B3ITX4	3;3;3	3;3;3	3;3;3	ATP synthase subunit g, mitochondrial	ATP5L	sp|O75964|ATP5L_HUMAN ATP synthase subunit g, mitochondrial OS=Homo sapiens OX=9606 GN=ATP5MG PE=1 SV=3;tr|E9PN17|E9PN17_HUMAN ATP synthase subunit g, mitochondrial OS=Homo sapiens OX=9606 GN=ATP5MG PE=1 SV=1;tr|A0A3B3ITX4|A0A3B3ITX4_HUMAN Uncharacterized	3	3	3	3	2	0	2	0	0	0	0	0	2	0	0	0	2	0	2	0	0	0	0	0	2	0	0	0	2	0	2	0	0	0	0	0	2	0	0	0	32
481	A0A3B3IU42;O14893;G5EA29;H0YEL0;O14893-3;O14893-2	A0A3B3IU42;O14893;G5EA29;H0YEL0;O14893-3;O14893-2	3;2;2;2;2;2	3;2;2;2;2;2	3;2;2;2;2;2	Gem-associated protein 2	GEMIN2	tr|A0A3B3IU42|A0A3B3IU42_HUMAN Gem-associated protein 2 OS=Homo sapiens OX=9606 GN=GEMIN2 PE=1 SV=1;sp|O14893|GEMI2_HUMAN Gem-associated protein 2 OS=Homo sapiens OX=9606 GN=GEMIN2 PE=1 SV=1;tr|G5EA29|G5EA29_HUMAN Gem-associated protein 2 OS=Homo sapiens O	6	3	3	3	0	0	3	0	0	0	0	0	0	0	0	0	0	0	3	0	0	0	0	0	0	0	0	0	0	0	3	0	0	0	0	0	0	0	0	0	12.7
482	A0A3B3IU46;Q9BTL3	A0A3B3IU46;Q9BTL3	2;1	2;1	2;1	RNMT-activating mini protein	FAM103A1	tr|A0A3B3IU46|A0A3B3IU46_HUMAN RNA guanine-7 methyltransferase-activating subunit-like (pseudogene) OS=Homo sapiens OX=9606 GN=RAMACL PE=4 SV=1;sp|Q9BTL3|RAMAC_HUMAN RNA guanine-N7 methyltransferase activating subunit OS=Homo sapiens OX=9606 GN=RAMAC PE=1	2	2	2	2	0	0	0	0	0	0	0	0	2	0	0	0	0	0	0	0	0	0	0	0	2	0	0	0	0	0	0	0	0	0	0	0	2	0	0	0	25.4
483	Q8WXE9;A0A3B3IU55;Q8WXE9-3	Q8WXE9;A0A3B3IU55;Q8WXE9-3	4;4;4	4;4;4	4;4;4	Stonin-2	STON2	sp|Q8WXE9|STON2_HUMAN Stonin-2 OS=Homo sapiens OX=9606 GN=STON2 PE=1 SV=1;tr|A0A3B3IU55|A0A3B3IU55_HUMAN Stonin-2 OS=Homo sapiens OX=9606 GN=STON2 PE=1 SV=1;sp|Q8WXE9-3|STON2_HUMAN Isoform 2 of Stonin-2 OS=Homo sapiens OX=9606 GN=STON2	3	4	4	4	0	0	4	0	0	0	0	0	0	0	0	0	0	0	4	0	0	0	0	0	0	0	0	0	0	0	4	0	0	0	0	0	0	0	0	0	5.1
484	P55769;B1AHD1;A0A3B3IUA2;A0A3B3IRU2;A0A3B3ISH1	P55769;B1AHD1;A0A3B3IUA2;A0A3B3IRU2	6;6;6;3;1	6;6;6;3;1	6;6;6;3;1	NHP2-like protein 1;NHP2-like protein 1, N-terminally processed	NHP2L1	sp|P55769|NH2L1_HUMAN NHP2-like protein 1 OS=Homo sapiens OX=9606 GN=SNU13 PE=1 SV=3;tr|B1AHD1|B1AHD1_HUMAN Ribonucloprotein OS=Homo sapiens OX=9606 GN=SNU13 PE=1 SV=1;tr|A0A3B3IUA2|A0A3B3IUA2_HUMAN Ribonucloprotein OS=Homo sapiens OX=9606 GN=SNU13 PE=1 SV	5	6	6	6	0	1	6	1	0	0	0	0	0	0	0	0	0	1	6	1	0	0	0	0	0	0	0	0	0	1	6	1	0	0	0	0	0	0	0	0	68.8
485	Q13144;A0A3B3IUB1;A0A3B3ISX3;A0A3B3ITG6;A0A3B3IUF2;A0A3B3ISM8;A0A3B3IS56;A0A3B3ISV1;A0A3B3IRP4;A0A3B3ITQ2;A0A3B3ITK8;A0A3B3IST9;A0A3B3ISI2;A0A3B3ISS1;C9JRD9;A0A3B3IT53	Q13144;A0A3B3IUB1;A0A3B3ISX3;A0A3B3ITG6;A0A3B3IUF2;A0A3B3ISM8	7;7;5;5;4;4;3;3;3;3;2;2;2;2;1;1	7;7;5;5;4;4;3;3;3;3;2;2;2;2;1;1	7;7;5;5;4;4;3;3;3;3;2;2;2;2;1;1	Translation initiation factor eIF-2B subunit epsilon	EIF2B5	sp|Q13144|EI2BE_HUMAN Translation initiation factor eIF-2B subunit epsilon OS=Homo sapiens OX=9606 GN=EIF2B5 PE=1 SV=3;tr|A0A3B3IUB1|A0A3B3IUB1_HUMAN eIF-2B GDP-GTP exchange factor subunit epsilon OS=Homo sapiens OX=9606 GN=EIF2B5 PE=1 SV=1;tr|A0A3B3ISX3|A	16	7	7	7	0	0	5	0	0	0	0	0	3	0	0	0	0	0	5	0	0	0	0	0	3	0	0	0	0	0	5	0	0	0	0	0	3	0	0	0	12.9
486	Q8TCT9;A0A3B3IUB5;Q8TCT9-5;A0A0S2Z6F0;A0A075B6F6;A0A3B3IT72;A0A0C4DGU3	Q8TCT9;A0A3B3IUB5;Q8TCT9-5;A0A0S2Z6F0;A0A075B6F6;A0A3B3IT72	8;8;8;6;5;5;1	8;8;8;6;5;5;1	2;2;2;0;0;0;0	Minor histocompatibility antigen H13	HM13	sp|Q8TCT9|HM13_HUMAN Minor histocompatibility antigen H13 OS=Homo sapiens OX=9606 GN=HM13 PE=1 SV=1;tr|A0A3B3IUB5|A0A3B3IUB5_HUMAN Minor histocompatibility antigen H13 OS=Homo sapiens OX=9606 GN=HM13 PE=1 SV=1;sp|Q8TCT9-5|HM13_HUMAN Isoform 5 of Minor hist	7	8	8	2	2	3	8	5	1	2	0	0	2	0	0	0	2	3	8	5	1	2	0	0	2	0	0	0	1	0	2	1	0	0	0	0	1	0	0	0	27.6
487	Q9Y287;A0A3B3IUC0;A0A3B3ISG3	Q9Y287;A0A3B3IUC0;A0A3B3ISG3	2;2;1	2;2;1	2;2;1	Integral membrane protein 2B;BRI2, membrane form;BRI2 intracellular domain;BRI2C, soluble form;Bri23 peptide	ITM2B	sp|Q9Y287|ITM2B_HUMAN Integral membrane protein 2B OS=Homo sapiens OX=9606 GN=ITM2B PE=1 SV=1;tr|A0A3B3IUC0|A0A3B3IUC0_HUMAN Integral membrane protein 2 OS=Homo sapiens OX=9606 GN=ITM2B PE=1 SV=1;tr|A0A3B3ISG3|A0A3B3ISG3_HUMAN Integral membrane protein 2 (	3	2	2	2	0	0	2	0	0	0	0	0	0	0	0	0	0	0	2	0	0	0	0	0	0	0	0	0	0	0	2	0	0	0	0	0	0	0	0	0	15.8
488	Q14690;A0A3B3IUD7;S4R3Q4	Q14690;A0A3B3IUD7	79;79;1	79;79;1	79;79;1	Protein RRP5 homolog	PDCD11	sp|Q14690|RRP5_HUMAN Protein RRP5 homolog OS=Homo sapiens OX=9606 GN=PDCD11 PE=1 SV=3;tr|A0A3B3IUD7|A0A3B3IUD7_HUMAN Programmed cell death 11, isoform CRA_a OS=Homo sapiens OX=9606 GN=PDCD11 PE=1 SV=1	3	79	79	79	0	59	15	61	0	58	0	11	0	30	0	13	0	59	15	61	0	58	0	11	0	30	0	13	0	59	15	61	0	58	0	11	0	30	0	13	57.1
489	A0A3F2YNW7;Q8NFD5-4;A0A1B0GTI6;H0Y3S9;A0A1B0GUC6;A0A1B0GV92;A0A1B0GVH0;A0A1B0GUG2;A0A1B0GTE8	A0A3F2YNW7;Q8NFD5-4	95;76;20;16;2;2;2;2;1	90;71;19;12;2;2;2;2;1	3;0;0;0;0;0;0;0;0	AT-rich interactive domain-containing protein 1B	ARID1B	tr|A0A3F2YNW7|A0A3F2YNW7_HUMAN AT-rich interactive domain-containing protein 1B OS=Homo sapiens OX=9606 GN=ARID1B PE=1 SV=1;sp|Q8NFD5-4|ARI1B_HUMAN Isoform 4 of AT-rich interactive domain-containing protein 1B OS=Homo sapiens OX=9606 GN=ARID1B	9	95	90	3	20	84	1	81	19	82	7	82	0	60	4	81	20	81	1	79	18	80	6	77	0	57	4	77	1	3	0	2	1	2	0	2	0	2	0	2	60.4
490	Q92794;A0A3F2YNX6;A0A3B3IS53;A5PLL3;A0A3B3ITI3;A0A3B3ISU5;C9JJY6;A0A3B3ISZ3	Q92794;A0A3F2YNX6;A0A3B3IS53;A5PLL3;A0A3B3ITI3	20;20;18;14;10;7;4;1	20;20;18;14;10;7;4;1	18;18;16;12;9;6;4;1	Histone acetyltransferase KAT6A;Histone acetyltransferase	KAT6A;MYST3	sp|Q92794|KAT6A_HUMAN Histone acetyltransferase KAT6A OS=Homo sapiens OX=9606 GN=KAT6A PE=1 SV=2;tr|A0A3F2YNX6|A0A3F2YNX6_HUMAN Histone acetyltransferase OS=Homo sapiens OX=9606 GN=KAT6A PE=1 SV=1;tr|A0A3B3IS53|A0A3B3IS53_HUMAN Histone acetyltransferase (F	8	20	20	18	0	0	0	0	0	2	0	10	0	3	0	19	0	0	0	0	0	2	0	10	0	3	0	19	0	0	0	0	0	1	0	9	0	3	0	18	14.8
491	Q6WCQ1;Q6WCQ1-3;Q6WCQ1-2;A0A494BZV2;J3KSW8;H0Y2S9;H0Y7E2;J3KSK7;H7C3G6;K7EJ14;A0A1W2PPU9	Q6WCQ1;Q6WCQ1-3;Q6WCQ1-2;A0A494BZV2;J3KSW8;H0Y2S9	18;18;18;18;15;10;4;3;2;1;1	18;18;18;18;15;10;4;3;2;1;1	18;18;18;18;15;10;4;3;2;1;1	Myosin phosphatase Rho-interacting protein	MPRIP	sp|Q6WCQ1|MPRIP_HUMAN Myosin phosphatase Rho-interacting protein OS=Homo sapiens OX=9606 GN=MPRIP PE=1 SV=3;sp|Q6WCQ1-3|MPRIP_HUMAN Isoform 3 of Myosin phosphatase Rho-interacting protein OS=Homo sapiens OX=9606 GN=MPRIP;sp|Q6WCQ1-2|MPRIP_HUMAN Isoform 2 o	11	18	18	18	2	0	15	0	0	1	0	0	0	1	0	0	2	0	15	0	0	1	0	0	0	1	0	0	2	0	15	0	0	1	0	0	0	1	0	0	26
492	Q9BZD7;C9J7E6;A0A494BZY9;A6NDZ7	Q9BZD7;C9J7E6;A0A494BZY9;A6NDZ7	1;1;1;1	1;1;1;1	1;1;1;1	Transmembrane gamma-carboxyglutamic acid protein 3;Osteocalcin	PRRG3	sp|Q9BZD7|TMG3_HUMAN Transmembrane gamma-carboxyglutamic acid protein 3 OS=Homo sapiens OX=9606 GN=PRRG3 PE=2 SV=2;tr|C9J7E6|C9J7E6_HUMAN Transmembrane gamma-carboxyglutamic acid protein 3 (Fragment) OS=Homo sapiens OX=9606 GN=PRRG3 PE=4 SV=1;tr|A0A494BZY9	4	1	1	1	0	0	0	0	1	0	0	0	0	0	0	0	0	0	0	0	1	0	0	0	0	0	0	0	0	0	0	0	1	0	0	0	0	0	0	0	3.9
493	P09493-2;F5H7S3;H7BYY1;H0YKJ4;H0YK48;A0A494BZZ2;B7Z596;P09493-5	P09493-2;F5H7S3;H7BYY1;H0YKJ4;H0YK48;A0A494BZZ2;B7Z596;P09493-5	4;4;4;4;4;4;4;4	1;1;1;1;1;1;1;1	1;1;1;1;1;1;1;1	Tropomyosin alpha-1 chain	TPM1	sp|P09493-2|TPM1_HUMAN Isoform 2 of Tropomyosin alpha-1 chain OS=Homo sapiens OX=9606 GN=TPM1;tr|F5H7S3|F5H7S3_HUMAN Tropomyosin alpha-1 chain OS=Homo sapiens OX=9606 GN=TPM1 PE=1 SV=2;tr|H7BYY1|H7BYY1_HUMAN Tropomyosin 1 (Alpha), isoform CRA_m OS=Homo sap	8	4	1	1	1	0	4	0	0	0	0	0	0	0	0	0	0	0	1	0	0	0	0	0	0	0	0	0	0	0	1	0	0	0	0	0	0	0	0	0	11.8
494	P35659;B4DFG0;H0Y993;A0A494C028;P35659-2;H0Y8X0;D6RDA2;A0A494C198;D6R9L5	P35659;B4DFG0;H0Y993;A0A494C028;P35659-2;H0Y8X0;D6RDA2;A0A494C198	4;4;4;4;3;3;2;2;1	4;4;4;4;3;3;2;2;1	4;4;4;4;3;3;2;2;1	Protein DEK	DEK	sp|P35659|DEK_HUMAN Protein DEK OS=Homo sapiens OX=9606 GN=DEK PE=1 SV=1;tr|B4DFG0|B4DFG0_HUMAN Protein DEK OS=Homo sapiens OX=9606 GN=DEK PE=1 SV=1;tr|H0Y993|H0Y993_HUMAN DEK oncogene (DNA binding), isoform CRA_b OS=Homo sapiens OX=9606 GN=DEK PE=1 SV=2;t	9	4	4	4	0	0	4	0	0	0	0	0	0	0	0	0	0	0	4	0	0	0	0	0	0	0	0	0	0	0	4	0	0	0	0	0	0	0	0	0	15.7
495	Q8N5F7;A0A494C050	Q8N5F7;A0A494C050	4;4	4;4	4;4	NF-kappa-B-activating protein	NKAP	sp|Q8N5F7|NKAP_HUMAN NF-kappa-B-activating protein OS=Homo sapiens OX=9606 GN=NKAP PE=1 SV=1;tr|A0A494C050|A0A494C050_HUMAN NF-kappa-B-activating protein (Fragment) OS=Homo sapiens OX=9606 GN=NKAP PE=1 SV=1	2	4	4	4	0	0	4	0	0	0	0	0	1	0	0	0	0	0	4	0	0	0	0	0	1	0	0	0	0	0	4	0	0	0	0	0	1	0	0	0	18.8
496	Q99707;A0A494C064;A0A494C1A2;Q99707-2	Q99707;A0A494C064;A0A494C1A2;Q99707-2	1;1;1;1	1;1;1;1	1;1;1;1	Methionine synthase	MTR	sp|Q99707|METH_HUMAN Methionine synthase OS=Homo sapiens OX=9606 GN=MTR PE=1 SV=2;tr|A0A494C064|A0A494C064_HUMAN Methionine synthase OS=Homo sapiens OX=9606 GN=MTR PE=1 SV=1;tr|A0A494C1A2|A0A494C1A2_HUMAN Methionine synthase OS=Homo sapiens OX=9606 GN=MTR	4	1	1	1	0	0	0	0	0	0	0	0	1	0	0	0	0	0	0	0	0	0	0	0	1	0	0	0	0	0	0	0	0	0	0	0	1	0	0	0	1
497	O95394;A0A494C0G1;H0Y987;O95394-3;O95394-4;D6RCQ8;D6RF77;A0A494C163;A0A494C099;A0A087WT27;A0A494C1Q4;J3KN95;A0A494C1E2;D6RCD1;D6RC77;D6RIS6	O95394;A0A494C0G1;H0Y987;O95394-3;O95394-4;D6RCQ8;D6RF77;A0A494C163;A0A494C099;A0A087WT27;A0A494C1Q4;J3KN95;A0A494C1E2	4;4;4;4;4;3;3;3;3;2;2;2;2;1;1;1	4;4;4;4;4;3;3;3;3;2;2;2;2;1;1;1	4;4;4;4;4;3;3;3;3;2;2;2;2;1;1;1	Phosphoacetylglucosamine mutase	PGM3	sp|O95394|AGM1_HUMAN Phosphoacetylglucosamine mutase OS=Homo sapiens OX=9606 GN=PGM3 PE=1 SV=1;tr|A0A494C0G1|A0A494C0G1_HUMAN Phosphoacetylglucosamine mutase OS=Homo sapiens OX=9606 GN=PGM3 PE=1 SV=1;tr|H0Y987|H0Y987_HUMAN Phosphoacetylglucosamine mutase O	16	4	4	4	0	0	0	0	0	0	0	0	4	0	0	0	0	0	0	0	0	0	0	0	4	0	0	0	0	0	0	0	0	0	0	0	4	0	0	0	10.3
498	Q7Z4L5;A0A494C0N4;Q7Z4L5-2	Q7Z4L5;A0A494C0N4	3;3;1	3;3;1	3;3;1	Tetratricopeptide repeat protein 21B	TTC21B	sp|Q7Z4L5|TT21B_HUMAN Tetratricopeptide repeat protein 21B OS=Homo sapiens OX=9606 GN=TTC21B PE=1 SV=2;tr|A0A494C0N4|A0A494C0N4_HUMAN Tetratricopeptide repeat protein 21B OS=Homo sapiens OX=9606 GN=TTC21B PE=1 SV=1	3	3	3	3	0	0	0	0	0	0	1	0	2	0	1	0	0	0	0	0	0	0	1	0	2	0	1	0	0	0	0	0	0	0	1	0	2	0	1	0	3.5
499	O75153;K7EIG1;I3L2B0;A0A494C0R8	O75153;K7EIG1;I3L2B0;A0A494C0R8	1;1;1;1	1;1;1;1	1;1;1;1	Clustered mitochondria protein homolog	CLUH	sp|O75153|CLU_HUMAN Clustered mitochondria protein homolog OS=Homo sapiens OX=9606 GN=CLUH PE=1 SV=2;tr|K7EIG1|K7EIG1_HUMAN Clustered mitochondria protein homolog (Fragment) OS=Homo sapiens OX=9606 GN=CLUH PE=1 SV=2;tr|I3L2B0|I3L2B0_HUMAN Clustered mitocho	4	1	1	1	0	0	1	0	0	0	0	0	0	0	0	0	0	0	1	0	0	0	0	0	0	0	0	0	0	0	1	0	0	0	0	0	0	0	0	0	1.8
500	Q92963;A0A494C0S1;V9GY29;A0A494C0U3;V9GYC3;Q92963-2;Q92963-3	Q92963;A0A494C0S1;V9GY29;A0A494C0U3;V9GYC3;Q92963-2;Q92963-3	2;2;1;1;1;1;1	2;2;1;1;1;1;1	2;2;1;1;1;1;1	GTP-binding protein Rit1	RIT1	sp|Q92963|RIT1_HUMAN GTP-binding protein Rit1 OS=Homo sapiens OX=9606 GN=RIT1 PE=1 SV=1;tr|A0A494C0S1|A0A494C0S1_HUMAN GTP-binding protein Rit1 OS=Homo sapiens OX=9606 GN=RIT1 PE=1 SV=1;tr|V9GY29|V9GY29_HUMAN GTP-binding protein Rit1 OS=Homo sapiens OX=960	7	2	2	2	0	0	2	0	0	0	0	0	0	0	0	0	0	0	2	0	0	0	0	0	0	0	0	0	0	0	2	0	0	0	0	0	0	0	0	0	14.6
501	A0A494C0Y9	A0A494C0Y9	11	1	1			tr|A0A494C0Y9|A0A494C0Y9_HUMAN Constitutive coactivator of PPAR-gamma-like protein 1 (Fragment) OS=Homo sapiens OX=9606 GN=FAM120A PE=1 SV=1	1	11	1	1	5	10	9	10	4	9	0	8	2	3	2	6	0	1	0	1	0	1	0	1	0	0	0	0	0	1	0	1	0	1	0	1	0	0	0	0	58.6
502	Q9UJA3;A0A494C100;Q9UJA3-2;Q9UJA3-3;Q9UJA3-4	Q9UJA3;A0A494C100;Q9UJA3-2;Q9UJA3-3;Q9UJA3-4	1;1;1;1;1	1;1;1;1;1	1;1;1;1;1	DNA helicase MCM8	MCM8	sp|Q9UJA3|MCM8_HUMAN DNA helicase MCM8 OS=Homo sapiens OX=9606 GN=MCM8 PE=1 SV=2;tr|A0A494C100|A0A494C100_HUMAN DNA helicase OS=Homo sapiens OX=9606 PE=3 SV=1;sp|Q9UJA3-2|MCM8_HUMAN Isoform 2 of DNA helicase MCM8 OS=Homo sapiens OX=9606 GN=MCM8;sp|Q9UJA3-3	5	1	1	1	0	0	1	0	0	0	0	0	0	0	0	0	0	0	1	0	0	0	0	0	0	0	0	0	0	0	1	0	0	0	0	0	0	0	0	0	3.2
503	Q8N9T8;A0A494C108;H0YFD2;F8WFC1	Q8N9T8;A0A494C108	14;14;4;4	14;14;4;4	14;14;4;4	Protein KRI1 homolog	KRI1	sp|Q8N9T8|KRI1_HUMAN Protein KRI1 homolog OS=Homo sapiens OX=9606 GN=KRI1 PE=1 SV=3;tr|A0A494C108|A0A494C108_HUMAN Protein KRI1 homolog OS=Homo sapiens OX=9606 GN=KRI1 PE=1 SV=1	4	14	14	14	0	0	13	2	0	0	0	0	3	0	0	0	0	0	13	2	0	0	0	0	3	0	0	0	0	0	13	2	0	0	0	0	3	0	0	0	30.7
504	Q9Y4D8;A0A494C150;F8VWT9;J3KPF0;Q9Y4D8-4	Q9Y4D8;A0A494C150;F8VWT9;J3KPF0;Q9Y4D8-4	1;1;1;1;1	1;1;1;1;1	1;1;1;1;1	Probable E3 ubiquitin-protein ligase HECTD4	HECTD4	sp|Q9Y4D8|HECD4_HUMAN Probable E3 ubiquitin-protein ligase HECTD4 OS=Homo sapiens OX=9606 GN=HECTD4 PE=1 SV=5;tr|A0A494C150|A0A494C150_HUMAN Probable E3 ubiquitin-protein ligase HECTD4 (Fragment) OS=Homo sapiens OX=9606 GN=HECTD4 PE=1 SV=1;tr|F8VWT9|F8VWT9	5	1	1	1	0	0	0	0	0	0	0	0	1	0	0	0	0	0	0	0	0	0	0	0	1	0	0	0	0	0	0	0	0	0	0	0	1	0	0	0	0.4
505	P52630;A0A494C164;P52630-4;B4DLC8;A0A494C1L3;A0A494C0B5;B4DHE0;G3V319	P52630;A0A494C164;P52630-4;B4DLC8	12;12;12;8;5;3;3;1	12;12;12;8;5;3;3;1	12;12;12;8;5;3;3;1	Signal transducer and activator of transcription 2	STAT2	sp|P52630|STAT2_HUMAN Signal transducer and activator of transcription 2 OS=Homo sapiens OX=9606 GN=STAT2 PE=1 SV=1;tr|A0A494C164|A0A494C164_HUMAN Signal transducer and activator of transcription OS=Homo sapiens OX=9606 GN=STAT2 PE=1 SV=1;sp|P52630-4|STAT2	8	12	12	12	0	0	8	0	0	0	0	0	7	0	0	0	0	0	8	0	0	0	0	0	7	0	0	0	0	0	8	0	0	0	0	0	7	0	0	0	23.4
506	P12955;P12955-3;A0A494C194;K7ES25;A0A494C165;P12955-2	P12955;P12955-3;A0A494C194;K7ES25;A0A494C165;P12955-2	1;1;1;1;1;1	1;1;1;1;1;1	1;1;1;1;1;1	Xaa-Pro dipeptidase	PEPD	sp|P12955|PEPD_HUMAN Xaa-Pro dipeptidase OS=Homo sapiens OX=9606 GN=PEPD PE=1 SV=3;sp|P12955-3|PEPD_HUMAN Isoform 3 of Xaa-Pro dipeptidase OS=Homo sapiens OX=9606 GN=PEPD;tr|A0A494C194|A0A494C194_HUMAN Xaa-Pro dipeptidase (Fragment) OS=Homo sapiens OX=9606	6	1	1	1	1	0	0	0	1	0	1	0	0	0	1	0	1	0	0	0	1	0	1	0	0	0	1	0	1	0	0	0	1	0	1	0	0	0	1	0	2
507	P29144;A0A494C1B8;Q5VZU9;A0A494C1S4;A0A494C0U1	P29144;A0A494C1B8;Q5VZU9;A0A494C1S4;A0A494C0U1	2;2;2;1;1	2;2;2;1;1	2;2;2;1;1	Tripeptidyl-peptidase 2	TPP2	sp|P29144|TPP2_HUMAN Tripeptidyl-peptidase 2 OS=Homo sapiens OX=9606 GN=TPP2 PE=1 SV=4;tr|A0A494C1B8|A0A494C1B8_HUMAN Tripeptidyl-peptidase 2 OS=Homo sapiens OX=9606 GN=TPP2 PE=1 SV=1;tr|Q5VZU9|Q5VZU9_HUMAN Tripeptidyl-peptidase 2 OS=Homo sapiens OX=9606 G	5	2	2	2	0	0	0	0	0	0	0	0	1	0	1	1	0	0	0	0	0	0	0	0	1	0	1	1	0	0	0	0	0	0	0	0	1	0	1	1	2.2
508	P19838;A0A494C1E9;P19838-2;A0A494C157;P19838-3;D6RF93;D6RH30;D6RC45	P19838;A0A494C1E9;P19838-2;A0A494C157;P19838-3;D6RF93	8;8;8;6;5;4;3;2	8;8;8;6;5;4;3;2	8;8;8;6;5;4;3;2	Nuclear factor NF-kappa-B p105 subunit;Nuclear factor NF-kappa-B p50 subunit	NFKB1	sp|P19838|NFKB1_HUMAN Nuclear factor NF-kappa-B p105 subunit OS=Homo sapiens OX=9606 GN=NFKB1 PE=1 SV=2;tr|A0A494C1E9|A0A494C1E9_HUMAN Nuclear factor NF-kappa-B p105 subunit OS=Homo sapiens OX=9606 GN=NFKB1 PE=1 SV=1;sp|P19838-2|NFKB1_HUMAN Isoform 2 of Nu	8	8	8	8	0	1	0	0	1	0	3	0	1	1	8	1	0	1	0	0	1	0	3	0	1	1	8	1	0	1	0	0	1	0	3	0	1	1	8	1	12.8
509	P35658;P35658-2;A0A494C1F2;P35658-5;A0A0A0MSW3;A0A494BZU9;H0Y837;B7ZAV2;H0YF36;A0A494C104;E9PKD2;A0A494C0Y1;H0YDS4;A0A494C0J0	P35658;P35658-2;A0A494C1F2;P35658-5;A0A0A0MSW3	71;71;71;70;50;29;18;15;7;7;7;6;5;2	71;71;71;70;50;29;18;15;7;7;7;6;5;2	1;1;1;1;1;1;0;0;0;0;0;0;0;0	Nuclear pore complex protein Nup214	NUP214	sp|P35658|NU214_HUMAN Nuclear pore complex protein Nup214 OS=Homo sapiens OX=9606 GN=NUP214 PE=1 SV=2;sp|P35658-2|NU214_HUMAN Isoform 2 of Nuclear pore complex protein Nup214 OS=Homo sapiens OX=9606 GN=NUP214;tr|A0A494C1F2|A0A494C1F2_HUMAN Nuclear pore com	14	71	71	1	41	28	17	35	43	37	43	51	19	45	43	63	41	28	17	35	43	37	43	51	19	45	43	63	0	0	0	1	1	0	0	0	0	1	0	0	52.4
510	Q86WJ1;A0A494C1F7;Q86WJ1-2;Q86WJ1-4;A0A0A0MSH9;A0A494C1P7;A0A0A0MRH8;Q86WJ1-3;Q86WJ1-5;A0A494C0J6;A0A087WTM4;A0A494C179;A0A494C0F0;A0A494C1S1;A0A087WWW4;A0A494C1H0;A0A494C0M4;A0A494C1I3;A0A494C0B8;A0A494C0Q0;A0A494C111	Q86WJ1;A0A494C1F7;Q86WJ1-2;Q86WJ1-4;A0A0A0MSH9;A0A494C1P7;A0A0A0MRH8;Q86WJ1-3;Q86WJ1-5;A0A494C0J6;A0A087WTM4	10;10;9;9;9;9;9;8;7;5;5;4;4;1;1;1;1;1;1;1;1	10;10;9;9;9;9;9;8;7;5;5;4;4;1;1;1;1;1;1;1;1	10;10;9;9;9;9;9;8;7;5;5;4;4;1;1;1;1;1;1;1;1	Chromodomain-helicase-DNA-binding protein 1-like	CHD1L	sp|Q86WJ1|CHD1L_HUMAN Chromodomain-helicase-DNA-binding protein 1-like OS=Homo sapiens OX=9606 GN=CHD1L PE=1 SV=3;tr|A0A494C1F7|A0A494C1F7_HUMAN Chromodomain-helicase-DNA-binding protein 1-like (Fragment) OS=Homo sapiens OX=9606 GN=CHD1L PE=1 SV=1;sp|Q86WJ	21	10	10	10	1	1	6	1	0	0	0	1	4	0	0	0	1	1	6	1	0	0	0	1	4	0	0	0	1	1	6	1	0	0	0	1	4	0	0	0	12.6
511	Q69YQ0;A0A494C1J1;Q69YQ0-2;F8WAN1;C9J8U1	Q69YQ0;A0A494C1J1;Q69YQ0-2;F8WAN1;C9J8U1	11;11;11;8;7	11;11;11;8;7	11;11;11;8;7	Cytospin-A	SPECC1L;SPECC1L-ADORA2A	sp|Q69YQ0|CYTSA_HUMAN Cytospin-A OS=Homo sapiens OX=9606 GN=SPECC1L PE=1 SV=2;tr|A0A494C1J1|A0A494C1J1_HUMAN Cytospin-A OS=Homo sapiens OX=9606 GN=SPECC1L PE=1 SV=1;sp|Q69YQ0-2|CYTSA_HUMAN Isoform 2 of Cytospin-A OS=Homo sapiens OX=9606 GN=SPECC1L;tr|F8WAN	5	11	11	11	0	0	1	0	0	0	0	0	11	0	0	0	0	0	1	0	0	0	0	0	11	0	0	0	0	0	1	0	0	0	0	0	11	0	0	0	14.7
512	Q6ZRV2;A0A494C1T9;J3KPS2	Q6ZRV2;A0A494C1T9;J3KPS2	69;69;61	69;69;61	69;69;61	Protein FAM83H	FAM83H	sp|Q6ZRV2|FA83H_HUMAN Protein FAM83H OS=Homo sapiens OX=9606 GN=FAM83H PE=1 SV=3;tr|A0A494C1T9|A0A494C1T9_HUMAN Protein FAM83H OS=Homo sapiens OX=9606 GN=FAM83H PE=1 SV=1;tr|J3KPS2|J3KPS2_HUMAN Protein FAM83H (Fragment) OS=Homo sapiens OX=9606 GN=FAM83H PE	3	69	69	69	63	0	31	0	63	0	13	0	7	0	16	0	63	0	31	0	63	0	13	0	7	0	16	0	63	0	31	0	63	0	13	0	7	0	16	0	71.8
513	A0A499FI31;Q15020;Q15020-4;Q15020-2;A0A494C0L2;F8W667;F8VVK9;H0YHU8;F8VZM2;Q15020-3	A0A499FI31;Q15020;Q15020-4	20;18;17;5;2;2;1;1;1;1	20;18;17;5;2;2;1;1;1;1	20;18;17;5;2;2;1;1;1;1	Squamous cell carcinoma antigen recognized by T-cells 3	SART3	tr|A0A499FI31|A0A499FI31_HUMAN Squamous cell carcinoma antigen recognized by T-cells 3 OS=Homo sapiens OX=9606 GN=SART3 PE=1 SV=1;sp|Q15020|SART3_HUMAN Squamous cell carcinoma antigen recognized by T-cells 3 OS=Homo sapiens OX=9606 GN=SART3 PE=1 SV=1;sp|Q1	10	20	20	20	0	0	11	1	2	0	0	0	10	0	3	0	0	0	11	1	2	0	0	0	10	0	3	0	0	0	11	1	2	0	0	0	10	0	3	0	25.5
514	Q9BUB5;Q9BUB5-2;E9PMM8;E9PIA0;A0A499FJS1;A0A499FJN1;A0A499FIS5;Q9BUB5-3	Q9BUB5;Q9BUB5-2;E9PMM8;E9PIA0;A0A499FJS1;A0A499FJN1;A0A499FIS5;Q9BUB5-3	1;1;1;1;1;1;1;1	1;1;1;1;1;1;1;1	1;1;1;1;1;1;1;1	MAP kinase-interacting serine/threonine-protein kinase 1	MKNK1	sp|Q9BUB5|MKNK1_HUMAN MAP kinase-interacting serine/threonine-protein kinase 1 OS=Homo sapiens OX=9606 GN=MKNK1 PE=1 SV=1;sp|Q9BUB5-2|MKNK1_HUMAN Isoform 2 of MAP kinase-interacting serine/threonine-protein kinase 1 OS=Homo sapiens OX=9606 GN=MKNK1;tr|E9PM	8	1	1	1	0	0	0	0	0	0	0	0	1	0	0	0	0	0	0	0	0	0	0	0	1	0	0	0	0	0	0	0	0	0	0	0	1	0	0	0	2.6
515	A0A499FIZ0;Q9H7D7;Q9H7D7-2;H0Y9R3;C9JCS7;H0Y917;Q9H7D7-3;Q9H7D7-4	A0A499FIZ0;Q9H7D7;Q9H7D7-2;H0Y9R3	10;9;9;5;3;1;1;1	10;9;9;5;3;1;1;1	10;9;9;5;3;1;1;1	WD repeat-containing protein 26	WDR26	tr|A0A499FIZ0|A0A499FIZ0_HUMAN WD repeat-containing protein 26 OS=Homo sapiens OX=9606 GN=WDR26 PE=1 SV=1;sp|Q9H7D7|WDR26_HUMAN WD repeat-containing protein 26 OS=Homo sapiens OX=9606 GN=WDR26 PE=1 SV=3;sp|Q9H7D7-2|WDR26_HUMAN Isoform 2 of WD repeat-contai	8	10	10	10	0	0	1	1	4	1	0	0	1	1	6	1	0	0	1	1	4	1	0	0	1	1	6	1	0	0	1	1	4	1	0	0	1	1	6	1	16.6
516	Q07912;Q07912-3;A0A5F9ZH01;A0A5F9ZHP4;C9J1X3;A0A5F9ZI29;A0A5F9ZGX5;A0A5F9ZHJ2;A0A499FJ16;Q07912-2;A0A5F9ZHL4;A0A5F9ZHI7;A0A5F9ZHB0	Q07912;Q07912-3;A0A5F9ZH01;A0A5F9ZHP4;C9J1X3;A0A5F9ZI29;A0A5F9ZGX5;A0A5F9ZHJ2;A0A499FJ16;Q07912-2;A0A5F9ZHL4	3;3;3;3;3;3;3;3;3;3;2;1;1	3;3;3;3;3;3;3;3;3;3;2;1;1	3;3;3;3;3;3;3;3;3;3;2;1;1	Activated CDC42 kinase 1	TNK2	sp|Q07912|ACK1_HUMAN Activated CDC42 kinase 1 OS=Homo sapiens OX=9606 GN=TNK2 PE=1 SV=3;sp|Q07912-3|ACK1_HUMAN Isoform 3 of Activated CDC42 kinase 1 OS=Homo sapiens OX=9606 GN=TNK2;tr|A0A5F9ZH01|A0A5F9ZH01_HUMAN Activated CDC42 kinase 1 (Fragment) OS=Homo	13	3	3	3	0	0	0	0	2	0	0	0	0	1	0	0	0	0	0	0	2	0	0	0	0	1	0	0	0	0	0	0	2	0	0	0	0	1	0	0	3.2
517	O75592;A0A499FJI4;O75592-2;H7C3U4	O75592;A0A499FJI4;O75592-2	4;4;4;1	4;4;4;1	4;4;4;1	E3 ubiquitin-protein ligase MYCBP2	MYCBP2	sp|O75592|MYCB2_HUMAN E3 ubiquitin-protein ligase MYCBP2 OS=Homo sapiens OX=9606 GN=MYCBP2 PE=1 SV=4;tr|A0A499FJI4|A0A499FJI4_HUMAN RCR-type E3 ubiquitin transferase OS=Homo sapiens OX=9606 GN=MYCBP2 PE=1 SV=1;sp|O75592-2|MYCB2_HUMAN Isoform 2 of E3 ubiqui	4	4	4	4	0	0	2	0	2	0	0	0	0	0	0	0	0	0	2	0	2	0	0	0	0	0	0	0	0	0	2	0	2	0	0	0	0	0	0	0	1
518	P01137;A0A499FJK2;M0R2S0	P01137;A0A499FJK2	4;4;1	4;4;1	4;4;1	Transforming growth factor beta-1;Latency-associated peptide	TGFB1	sp|P01137|TGFB1_HUMAN Transforming growth factor beta-1 proprotein OS=Homo sapiens OX=9606 GN=TGFB1 PE=1 SV=2;tr|A0A499FJK2|A0A499FJK2_HUMAN Transforming growth factor beta OS=Homo sapiens OX=9606 GN=TGFB1 PE=1 SV=1	3	4	4	4	0	0	0	0	1	0	3	0	0	0	1	0	0	0	0	0	1	0	3	0	0	0	1	0	0	0	0	0	1	0	3	0	0	0	1	0	13.6
519	O14920;A0A499FJS7;O14920-2;G3V105;O14920-4;E5RGW5;O14920-3;J3KNS5	O14920;A0A499FJS7;O14920-2;G3V105;O14920-4;E5RGW5	7;7;7;6;6;4;3;1	7;7;7;6;6;4;3;1	7;7;7;6;6;4;3;1	Inhibitor of nuclear factor kappa-B kinase subunit beta	IKBKB	sp|O14920|IKKB_HUMAN Inhibitor of nuclear factor kappa-B kinase subunit beta OS=Homo sapiens OX=9606 GN=IKBKB PE=1 SV=1;tr|A0A499FJS7|A0A499FJS7_HUMAN I-kappa-B kinase OS=Homo sapiens OX=9606 GN=IKBKB PE=1 SV=1;sp|O14920-2|IKKB_HUMAN Isoform 2 of Inhibitor	8	7	7	7	0	0	0	0	0	0	0	0	3	0	6	0	0	0	0	0	0	0	0	0	3	0	6	0	0	0	0	0	0	0	0	0	3	0	6	0	10.4
520	Q96AP0;A0A590TQL1;R4GNJ5;Q96AP0-2	Q96AP0;A0A590TQL1;R4GNJ5;Q96AP0-2	2;2;1;1	2;2;1;1	2;2;1;1	Adrenocortical dysplasia protein homolog	ACD	sp|Q96AP0|ACD_HUMAN Adrenocortical dysplasia protein homolog OS=Homo sapiens OX=9606 GN=ACD PE=1 SV=4;tr|A0A590TQL1|A0A590TQL1_HUMAN Adrenocortical dysplasia homolog (Mouse), isoform CRA_a OS=Homo sapiens OX=9606 GN=ACD PE=1 SV=1;tr|R4GNJ5|R4GNJ5_HUMAN Adr	4	2	2	2	0	0	0	0	0	2	0	0	0	1	0	2	0	0	0	0	0	2	0	0	0	1	0	2	0	0	0	0	0	2	0	0	0	1	0	2	11.8
521	Q9UGM3;A0A590UK99;A0A590UIX5;A0A590UJF8;A0A590UJZ9;A0A590UJ76;Q9UGM3-9;Q9UGM3-4;Q9UGM3-8;Q9UGM3-2;Q9UGM3-5;Q9UGM3-3;Q9UGM3-7;Q9UGM3-6	Q9UGM3;A0A590UK99;A0A590UIX5;A0A590UJF8;A0A590UJZ9;A0A590UJ76;Q9UGM3-9;Q9UGM3-4;Q9UGM3-8;Q9UGM3-2;Q9UGM3-5;Q9UGM3-3;Q9UGM3-7;Q9UGM3-6	1;1;1;1;1;1;1;1;1;1;1;1;1;1	1;1;1;1;1;1;1;1;1;1;1;1;1;1	1;1;1;1;1;1;1;1;1;1;1;1;1;1	Deleted in malignant brain tumors 1 protein	DMBT1	sp|Q9UGM3|DMBT1_HUMAN Deleted in malignant brain tumors 1 protein OS=Homo sapiens OX=9606 GN=DMBT1 PE=1 SV=2;tr|A0A590UK99|A0A590UK99_HUMAN Deleted in malignant brain tumors 1 protein (Fragment) OS=Homo sapiens OX=9606 GN=DMBT1 PE=1 SV=1;tr|A0A590UIX5|A0A5	14	1	1	1	1	0	0	1	0	0	1	0	0	0	0	0	1	0	0	1	0	0	1	0	0	0	0	0	1	0	0	1	0	0	1	0	0	0	0	0	7
522	P48729;U3KPX3;A0A590UJ43;P48729-2;H0Y9X2;U3KQK7;Q8N752;A0A590UJQ7;E5RG27;D6RGE5;U3KQ83	P48729;U3KPX3;A0A590UJ43;P48729-2;H0Y9X2;U3KQK7;Q8N752	14;14;14;13;8;8;7;3;3;3;1	1;1;1;1;1;1;0;0;0;0;0	1;1;1;1;1;1;0;0;0;0;0	Casein kinase I isoform alpha;Casein kinase I isoform alpha-like	CSNK1A1;CSNK1A1L	sp|P48729|KC1A_HUMAN Casein kinase I isoform alpha OS=Homo sapiens OX=9606 GN=CSNK1A1 PE=1 SV=2;tr|U3KPX3|U3KPX3_HUMAN Casein kinase I isoform alpha OS=Homo sapiens OX=9606 GN=CSNK1A1 PE=1 SV=2;tr|A0A590UJ43|A0A590UJ43_HUMAN Casein kinase I isoform alpha O	11	14	1	1	13	1	10	0	12	1	3	0	9	0	4	1	1	0	0	0	1	0	0	0	0	0	0	0	1	0	0	0	1	0	0	0	0	0	0	0	50.1
523	Q9P2N6;Q9P2N6-3;C9J5A4;A0A590UJ53;Q9P2N6-8;Q9P2N6-6;Q9P2N6-2;Q9P2N6-5;Q9P2N6-4	Q9P2N6;Q9P2N6-3;C9J5A4;A0A590UJ53;Q9P2N6-8;Q9P2N6-6;Q9P2N6-2;Q9P2N6-5;Q9P2N6-4	1;1;1;1;1;1;1;1;1	1;1;1;1;1;1;1;1;1	1;1;1;1;1;1;1;1;1	KAT8 regulatory NSL complex subunit 3	KANSL3	sp|Q9P2N6|KANL3_HUMAN KAT8 regulatory NSL complex subunit 3 OS=Homo sapiens OX=9606 GN=KANSL3 PE=1 SV=2;sp|Q9P2N6-3|KANL3_HUMAN Isoform 3 of KAT8 regulatory NSL complex subunit 3 OS=Homo sapiens OX=9606 GN=KANSL3;tr|C9J5A4|C9J5A4_HUMAN KAT8 regulatory NSL	9	1	1	1	0	0	0	0	0	0	0	0	0	1	0	0	0	0	0	0	0	0	0	0	0	1	0	0	0	0	0	0	0	0	0	0	0	1	0	0	1.5
524	Q13402;A0A590UJ94;H7C4D8;Q13402-5;Q13402-8;Q13402-2;Q13402-7;Q13402-6	Q13402;A0A590UJ94;H7C4D8;Q13402-5;Q13402-8;Q13402-2;Q13402-7;Q13402-6	2;2;2;2;2;2;2;2	2;2;2;2;2;2;2;2	2;2;2;2;2;2;2;2	Unconventional myosin-VIIa	MYO7A	sp|Q13402|MYO7A_HUMAN Unconventional myosin-VIIa OS=Homo sapiens OX=9606 GN=MYO7A PE=1 SV=2;tr|A0A590UJ94|A0A590UJ94_HUMAN Unconventional myosin-VIIa (Fragment) OS=Homo sapiens OX=9606 GN=MYO7A PE=1 SV=1;tr|H7C4D8|H7C4D8_HUMAN Unconventional myosin-VIIa (F	8	2	2	2	0	0	0	0	0	0	0	0	2	0	0	0	0	0	0	0	0	0	0	0	2	0	0	0	0	0	0	0	0	0	0	0	2	0	0	0	1.8
525	A0A590UJ96	A0A590UJ96	5	5	5			tr|A0A590UJ96|A0A590UJ96_HUMAN Uncharacterized protein OS=Homo sapiens OX=9606 PE=1 SV=1	1	5	5	5	0	0	0	0	0	0	0	2	0	0	0	3	0	0	0	0	0	0	0	2	0	0	0	3	0	0	0	0	0	0	0	2	0	0	0	3	5.7
526	Q9NUX5;A0A590UJP0;Q5MJ34;A0A590UJF2;B7Z7M5;Q9NUX5-2;Q5MJ35;A8MTK3;A0A590UJF7;A0A590UJM4;Q5MJ33;A0A590UJR1;V9GZ00;C9JPG9	Q9NUX5;A0A590UJP0;Q5MJ34;A0A590UJF2;B7Z7M5;Q9NUX5-2;Q5MJ35;A8MTK3;A0A590UJF7	3;3;3;3;3;3;2;2;2;1;1;1;1;1	3;3;3;3;3;3;2;2;2;1;1;1;1;1	3;3;3;3;3;3;2;2;2;1;1;1;1;1	Protection of telomeres protein 1	POT1	sp|Q9NUX5|POTE1_HUMAN Protection of telomeres protein 1 OS=Homo sapiens OX=9606 GN=POT1 PE=1 SV=1;tr|A0A590UJP0|A0A590UJP0_HUMAN Protection of telomeres protein 1 OS=Homo sapiens OX=9606 GN=POT1 PE=1 SV=1;tr|Q5MJ34|Q5MJ34_HUMAN Protection of telomeres prot	14	3	3	3	0	1	0	0	0	2	0	1	0	0	0	2	0	1	0	0	0	2	0	1	0	0	0	2	0	1	0	0	0	2	0	1	0	0	0	2	6.6
527	Q14BN4;Q14BN4-3;H7BZK0;A0A590UJS6;A0A590UJU9;H7C3M8;A0A590UJK3;Q14BN4-5;Q14BN4-4;Q14BN4-2	Q14BN4;Q14BN4-3;H7BZK0;A0A590UJS6;A0A590UJU9;H7C3M8;A0A590UJK3;Q14BN4-5;Q14BN4-4;Q14BN4-2	1;1;1;1;1;1;1;1;1;1	1;1;1;1;1;1;1;1;1;1	1;1;1;1;1;1;1;1;1;1	Sarcolemmal membrane-associated protein	SLMAP	sp|Q14BN4|SLMAP_HUMAN Sarcolemmal membrane-associated protein OS=Homo sapiens OX=9606 GN=SLMAP PE=1 SV=1;sp|Q14BN4-3|SLMAP_HUMAN Isoform 3 of Sarcolemmal membrane-associated protein OS=Homo sapiens OX=9606 GN=SLMAP;tr|H7BZK0|H7BZK0_HUMAN Sarcolemmal membra	10	1	1	1	1	0	1	0	0	0	0	0	0	0	0	0	1	0	1	0	0	0	0	0	0	0	0	0	1	0	1	0	0	0	0	0	0	0	0	0	1.2
528	Q13247;A0A590UJK4;A0A590UK01;A0A590UJP7;A0A590UK80;Q13247-3;Q08170;A0A0D9SEM4;Q13247-2	Q13247;A0A590UJK4;A0A590UK01;A0A590UJP7;A0A590UK80;Q13247-3	4;4;4;4;4;4;1;1;1	3;3;3;3;3;3;0;0;1	3;3;3;3;3;3;0;0;1	Serine/arginine-rich splicing factor 6	SRSF6	sp|Q13247|SRSF6_HUMAN Serine/arginine-rich splicing factor 6 OS=Homo sapiens OX=9606 GN=SRSF6 PE=1 SV=2;tr|A0A590UJK4|A0A590UJK4_HUMAN Serine/arginine-rich-splicing factor 6 OS=Homo sapiens OX=9606 GN=SRSF6 PE=1 SV=1;tr|A0A590UK01|A0A590UK01_HUMAN Serine/a	9	4	3	3	2	0	2	0	2	0	3	0	2	0	1	0	1	0	1	0	1	0	2	0	1	0	0	0	1	0	1	0	1	0	2	0	1	0	0	0	11
529	Q13423;A0A590UJM2;A0A590UK29;A0A590UJI3;E9PCX7;A0A590UK15;D6RAI5;D6RHU2;A0A590UJA4;A0A590UKC7;D6RCR6	Q13423;A0A590UJM2;A0A590UK29;A0A590UJI3;E9PCX7;A0A590UK15	12;12;12;11;11;8;5;3;3;3;2	12;12;12;11;11;8;5;3;3;3;2	12;12;12;11;11;8;5;3;3;3;2	NAD(P) transhydrogenase, mitochondrial	NNT	sp|Q13423|NNTM_HUMAN NAD(P) transhydrogenase, mitochondrial OS=Homo sapiens OX=9606 GN=NNT PE=1 SV=3;tr|A0A590UJM2|A0A590UJM2_HUMAN NAD(P) transhydrogenase, mitochondrial OS=Homo sapiens OX=9606 GN=NNT PE=1 SV=1;tr|A0A590UK29|A0A590UK29_HUMAN NAD(P) transh	11	12	12	12	0	0	6	0	0	0	0	0	9	0	0	0	0	0	6	0	0	0	0	0	9	0	0	0	0	0	6	0	0	0	0	0	9	0	0	0	16.9
530	Q9H2F5;A0A590UJN0;Q9H2F5-3;Q9H2F5-2	Q9H2F5;A0A590UJN0;Q9H2F5-3;Q9H2F5-2	2;2;2;2	2;2;2;2	2;2;2;2	Enhancer of polycomb homolog 1	EPC1	sp|Q9H2F5|EPC1_HUMAN Enhancer of polycomb homolog 1 OS=Homo sapiens OX=9606 GN=EPC1 PE=1 SV=1;tr|A0A590UJN0|A0A590UJN0_HUMAN Enhancer of polycomb homolog OS=Homo sapiens OX=9606 GN=EPC1 PE=1 SV=1;sp|Q9H2F5-3|EPC1_HUMAN Isoform 3 of Enhancer of polycomb hom	4	2	2	2	0	2	0	0	0	0	0	0	0	0	0	0	0	2	0	0	0	0	0	0	0	0	0	0	0	2	0	0	0	0	0	0	0	0	0	0	2.3
531	P15036;C9JAG2;A0A590UJP9;A0A0C4DG47	P15036;C9JAG2;A0A590UJP9;A0A0C4DG47	2;2;2;1	2;2;2;1	2;2;2;1	Protein C-ets-2	ETS2	sp|P15036|ETS2_HUMAN Protein C-ets-2 OS=Homo sapiens OX=9606 GN=ETS2 PE=1 SV=1;tr|C9JAG2|C9JAG2_HUMAN Protein C-ets-2 (Fragment) OS=Homo sapiens OX=9606 GN=ETS2 PE=1 SV=1;tr|A0A590UJP9|A0A590UJP9_HUMAN Protein C-ets-2 OS=Homo sapiens OX=9606 GN=ETS2 PE=1 S	4	2	2	2	0	0	2	0	0	0	0	0	0	0	0	0	0	0	2	0	0	0	0	0	0	0	0	0	0	0	2	0	0	0	0	0	0	0	0	0	10.4
532	Q6KC79;Q6KC79-2;A0A590UJS4;Q6KC79-3	Q6KC79;Q6KC79-2;A0A590UJS4	39;39;39;9	39;39;39;9	39;39;39;9	Nipped-B-like protein	NIPBL	sp|Q6KC79|NIPBL_HUMAN Nipped-B-like protein OS=Homo sapiens OX=9606 GN=NIPBL PE=1 SV=2;sp|Q6KC79-2|NIPBL_HUMAN Isoform 2 of Nipped-B-like protein OS=Homo sapiens OX=9606 GN=NIPBL;tr|A0A590UJS4|A0A590UJS4_HUMAN Nipped-B protein OS=Homo sapiens OX=9606 GN=NI	4	39	39	39	0	9	0	16	0	12	0	2	0	32	0	10	0	9	0	16	0	12	0	2	0	32	0	10	0	9	0	16	0	12	0	2	0	32	0	10	17.4
533	O75027;A0A590UJS8;A0A5F9ZA98;O75027-2;B4DGL8;A0A2R8Y473;A0A087WW65;O75027-3;E9PJR8;E9PNQ5;A0A2R8Y3N2	O75027;A0A590UJS8;A0A5F9ZA98;O75027-2;B4DGL8;A0A2R8Y473;A0A087WW65;O75027-3	9;9;9;9;8;7;7;7;2;1;1	9;9;9;9;8;7;7;7;2;1;1	9;9;9;9;8;7;7;7;2;1;1	ATP-binding cassette sub-family B member 7, mitochondrial	ABCB7	sp|O75027|ABCB7_HUMAN ATP-binding cassette sub-family B member 7, mitochondrial OS=Homo sapiens OX=9606 GN=ABCB7 PE=1 SV=2;tr|A0A590UJS8|A0A590UJS8_HUMAN ATP-binding cassette sub-family B member 7, mitochondrial OS=Homo sapiens OX=9606 GN=ABCB7 PE=1 SV=1;t	11	9	9	9	2	0	6	0	2	1	0	0	2	0	0	0	2	0	6	0	2	1	0	0	2	0	0	0	2	0	6	0	2	1	0	0	2	0	0	0	19.9
534	A0A590UK94	A0A590UK94	5	1	1			tr|A0A590UK94|A0A590UK94_HUMAN Casein kinase I isoform alpha (Fragment) OS=Homo sapiens OX=9606 GN=CSNK1A1 PE=1 SV=1	1	5	1	1	3	0	2	0	5	0	0	0	2	0	2	0	0	0	0	0	1	0	0	0	0	0	0	0	0	0	0	0	1	0	0	0	0	0	0	0	57.3
535	Q9BRK5;A0A5F9UP49;A0A5F9UJX7;Q9BRK5-6;H0Y3T6;G3V1E2;Q9BRK5-4;Q9BRK5-3;Q9BRK5-2;Q9BRK5-5	Q9BRK5;A0A5F9UP49;A0A5F9UJX7;Q9BRK5-6;H0Y3T6;G3V1E2;Q9BRK5-4;Q9BRK5-3;Q9BRK5-2	5;5;4;4;3;3;3;3;3;1	5;5;4;4;3;3;3;3;3;1	5;5;4;4;3;3;3;3;3;1	45 kDa calcium-binding protein	SDF4	sp|Q9BRK5|CAB45_HUMAN 45 kDa calcium-binding protein OS=Homo sapiens OX=9606 GN=SDF4 PE=1 SV=1;tr|A0A5F9UP49|A0A5F9UP49_HUMAN 45 kDa calcium-binding protein OS=Homo sapiens OX=9606 GN=SDF4 PE=1 SV=1;tr|A0A5F9UJX7|A0A5F9UJX7_HUMAN 45 kDa calcium-binding pro	10	5	5	5	0	0	2	0	0	0	0	0	5	0	0	0	0	0	2	0	0	0	0	0	5	0	0	0	0	0	2	0	0	0	0	0	5	0	0	0	25.4
536	A0A5F9YFS9;Q9Y6A9;C9JBL1	A0A5F9YFS9;Q9Y6A9;C9JBL1	3;2;2	3;2;2	3;2;2	Signal peptidase complex subunit 1	SPCS1	tr|A0A5F9YFS9|A0A5F9YFS9_HUMAN Microsomal signal peptidase 12 kDa subunit OS=Homo sapiens OX=9606 GN=SPCS1 PE=1 SV=1;sp|Q9Y6A9|SPCS1_HUMAN Signal peptidase complex subunit 1 OS=Homo sapiens OX=9606 GN=SPCS1 PE=1 SV=5;tr|C9JBL1|C9JBL1_HUMAN Microsomal signa	3	3	3	3	0	0	3	0	0	0	0	0	1	0	0	0	0	0	3	0	0	0	0	0	1	0	0	0	0	0	3	0	0	0	0	0	1	0	0	0	31.4
537	P05089;A0A5F9ZGN6;P05089-2;A0A5F9ZH78;P05089-3	P05089;A0A5F9ZGN6;P05089-2;A0A5F9ZH78	3;3;3;2;1	3;3;3;2;1	3;3;3;2;1	Arginase-1	ARG1	sp|P05089|ARGI1_HUMAN Arginase-1 OS=Homo sapiens OX=9606 GN=ARG1 PE=1 SV=2;tr|A0A5F9ZGN6|A0A5F9ZGN6_HUMAN Arginase OS=Homo sapiens OX=9606 GN=ARG1 PE=1 SV=1;sp|P05089-2|ARGI1_HUMAN Isoform 2 of Arginase-1 OS=Homo sapiens OX=9606 GN=ARG1;tr|A0A5F9ZH78|A0A5F	5	3	3	3	3	0	0	0	0	0	0	0	0	0	0	0	3	0	0	0	0	0	0	0	0	0	0	0	3	0	0	0	0	0	0	0	0	0	0	0	15.8
538	P55201;P55201-4;A0A5F9ZH11;P55201-3;A0A5F9ZHW9;P55201-2	P55201;P55201-4;A0A5F9ZH11;P55201-3;A0A5F9ZHW9;P55201-2	2;2;2;2;1;1	2;2;2;2;1;1	2;2;2;2;1;1	Peregrin	BRPF1	sp|P55201|BRPF1_HUMAN Peregrin OS=Homo sapiens OX=9606 GN=BRPF1 PE=1 SV=2;sp|P55201-4|BRPF1_HUMAN Isoform 4 of Peregrin OS=Homo sapiens OX=9606 GN=BRPF1;tr|A0A5F9ZH11|A0A5F9ZH11_HUMAN Peregrin (Fragment) OS=Homo sapiens OX=9606 GN=BRPF1 PE=1 SV=1;sp|P55201	6	2	2	2	0	0	1	1	0	0	0	0	0	0	0	0	0	0	1	1	0	0	0	0	0	0	0	0	0	0	1	1	0	0	0	0	0	0	0	0	4.4
539	A0A5F9ZH45	A0A5F9ZH45	12	2	0			tr|A0A5F9ZH45|A0A5F9ZH45_HUMAN Pleckstrin homology domain-containing family A member 6 (Fragment) OS=Homo sapiens OX=9606 GN=PLEKHA6 PE=1 SV=1	1	12	2	0	1	10	3	9	0	8	0	5	1	2	1	8	0	2	0	2	0	2	0	1	0	0	0	2	0	0	0	0	0	0	0	0	0	0	0	0	49.1
540	Q8N9N2;A0A5F9ZHP1;A0A5F9ZI37;A0A5F9ZH79;A0A5K1VW55;Q8N9N2-2;E9PJM2;H0YCB3;A0A5F9ZI10;E9PQ44;H0YER2;E9PR40;E9PKM6;E9PL92;A0A5F9ZGP6;E9PQZ6;H0YE76	Q8N9N2;A0A5F9ZHP1;A0A5F9ZI37;A0A5F9ZH79;A0A5K1VW55;Q8N9N2-2;E9PJM2;H0YCB3;A0A5F9ZI10;E9PQ44;H0YER2;E9PR40;E9PKM6;E9PL92;A0A5F9ZGP6;E9PQZ6;H0YE76	2;2;2;2;2;2;1;1;1;1;1;1;1;1;1;1;1	2;2;2;2;2;2;1;1;1;1;1;1;1;1;1;1;1	2;2;2;2;2;2;1;1;1;1;1;1;1;1;1;1;1	Activating signal cointegrator 1 complex subunit 1	ASCC1	sp|Q8N9N2|ASCC1_HUMAN Activating signal cointegrator 1 complex subunit 1 OS=Homo sapiens OX=9606 GN=ASCC1 PE=1 SV=1;tr|A0A5F9ZHP1|A0A5F9ZHP1_HUMAN Activating signal cointegrator 1 complex subunit 1 OS=Homo sapiens OX=9606 GN=ASCC1 PE=1 SV=1;tr|A0A5F9ZI37|A	17	2	2	2	0	0	2	0	0	0	0	0	0	0	0	0	0	0	2	0	0	0	0	0	0	0	0	0	0	0	2	0	0	0	0	0	0	0	0	0	5.2
541	P49642;F8VNY2;A0A5F9ZHB6	P49642;F8VNY2;A0A5F9ZHB6	1;1;1	1;1;1	1;1;1	DNA primase small subunit;DNA primase	PRIM1	sp|P49642|PRI1_HUMAN DNA primase small subunit OS=Homo sapiens OX=9606 GN=PRIM1 PE=1 SV=1;tr|F8VNY2|F8VNY2_HUMAN DNA primase (Fragment) OS=Homo sapiens OX=9606 GN=PRIM1 PE=1 SV=8;tr|A0A5F9ZHB6|A0A5F9ZHB6_HUMAN DNA primase OS=Homo sapiens OX=9606 GN=PRIM1 P	3	1	1	1	1	0	1	0	0	0	0	0	1	0	0	0	1	0	1	0	0	0	0	0	1	0	0	0	1	0	1	0	0	0	0	0	1	0	0	0	4.5
542	Q8NEP4;A0A5F9ZHH3	Q8NEP4;A0A5F9ZHH3	1;1	1;1	1;1	Uncharacterized protein C17orf47	C17orf47	sp|Q8NEP4|CQ047_HUMAN Uncharacterized protein C17orf47 OS=Homo sapiens OX=9606 GN=C17orf47 PE=1 SV=3;tr|A0A5F9ZHH3|A0A5F9ZHH3_HUMAN Septin-4 OS=Homo sapiens OX=9606 GN=SEPTIN4 PE=1 SV=1	2	1	1	1	0	1	0	1	0	1	0	1	0	0	0	1	0	1	0	1	0	1	0	1	0	0	0	1	0	1	0	1	0	1	0	1	0	0	0	1	2.1
543	P24752;A0A5F9ZHJ7;A0A5F9ZHL1;A0A5F9ZHL7;E9PRQ6;A0A5F9ZHH9;P24752-2;A0A5F9ZHD4;A0A5F9ZI66;A0A5F9ZHJ0;H0YEL7	P24752;A0A5F9ZHJ7;A0A5F9ZHL1;A0A5F9ZHL7;E9PRQ6;A0A5F9ZHH9;P24752-2	5;5;5;3;3;3;3;2;2;2;1	5;5;5;3;3;3;3;2;2;2;1	5;5;5;3;3;3;3;2;2;2;1	Acetyl-CoA acetyltransferase, mitochondrial	ACAT1	sp|P24752|THIL_HUMAN Acetyl-CoA acetyltransferase, mitochondrial OS=Homo sapiens OX=9606 GN=ACAT1 PE=1 SV=1;tr|A0A5F9ZHJ7|A0A5F9ZHJ7_HUMAN Acetyl-CoA acetyltransferase, mitochondrial OS=Homo sapiens OX=9606 GN=ACAT1 PE=1 SV=1;tr|A0A5F9ZHL1|A0A5F9ZHL1_HUMAN	11	5	5	5	4	0	1	0	1	0	0	0	0	0	0	0	4	0	1	0	1	0	0	0	0	0	0	0	4	0	1	0	1	0	0	0	0	0	0	0	15.5
544	P07195;A0A5F9ZHM4;A8MW50;A0A3B3IS95;C9J7H8;F5H793	P07195;A0A5F9ZHM4;A8MW50;A0A3B3IS95;C9J7H8;F5H793	9;9;7;7;6;5	8;8;6;6;6;5	8;8;6;6;6;5	L-lactate dehydrogenase B chain;L-lactate dehydrogenase	LDHB	sp|P07195|LDHB_HUMAN L-lactate dehydrogenase B chain OS=Homo sapiens OX=9606 GN=LDHB PE=1 SV=2;tr|A0A5F9ZHM4|A0A5F9ZHM4_HUMAN L-lactate dehydrogenase OS=Homo sapiens OX=9606 GN=LDHB PE=1 SV=1;tr|A8MW50|A8MW50_HUMAN L-lactate dehydrogenase (Fragment) OS=Hom	6	9	8	8	9	0	1	0	4	0	0	0	0	0	1	0	8	0	1	0	3	0	0	0	0	0	0	0	8	0	1	0	3	0	0	0	0	0	0	0	28.4
545	Q9NTJ5;A0A5F9ZHN7;E9PGZ4;Q9NTJ5-2;F8WDN7;C9JV50;F8WCQ2	Q9NTJ5;A0A5F9ZHN7;E9PGZ4;Q9NTJ5-2	10;10;7;7;4;2;1	10;10;7;7;4;2;1	10;10;7;7;4;2;1	Phosphatidylinositide phosphatase SAC1	SACM1L	sp|Q9NTJ5|SAC1_HUMAN Phosphatidylinositol-3-phosphatase SAC1 OS=Homo sapiens OX=9606 GN=SACM1L PE=1 SV=2;tr|A0A5F9ZHN7|A0A5F9ZHN7_HUMAN Phosphatidylinositol-3-phosphatase SAC1 OS=Homo sapiens OX=9606 GN=SACM1L PE=1 SV=1;tr|E9PGZ4|E9PGZ4_HUMAN Phosphatidyli	7	10	10	10	0	0	8	1	0	0	0	0	3	0	0	0	0	0	8	1	0	0	0	0	3	0	0	0	0	0	8	1	0	0	0	0	3	0	0	0	23.7
546	P23458;A0A5F9ZHN8;A0A5F9ZI39;A0A5F9ZH07;A0A5F9ZH32;A0A5F9ZHW0;A0A5F9ZI01;A0A5F9ZH73;A0A5F9ZHK2;A0A5F9ZHI1	P23458;A0A5F9ZHN8;A0A5F9ZI39;A0A5F9ZH07;A0A5F9ZH32	14;14;14;13;8;6;2;1;1;1	14;14;14;13;8;6;2;1;1;1	14;14;14;13;8;6;2;1;1;1	Tyrosine-protein kinase JAK1	JAK1	sp|P23458|JAK1_HUMAN Tyrosine-protein kinase JAK1 OS=Homo sapiens OX=9606 GN=JAK1 PE=1 SV=2;tr|A0A5F9ZHN8|A0A5F9ZHN8_HUMAN Tyrosine-protein kinase OS=Homo sapiens OX=9606 GN=JAK1 PE=1 SV=1;tr|A0A5F9ZI39|A0A5F9ZI39_HUMAN Tyrosine-protein kinase OS=Homo sapi	10	14	14	14	2	0	12	0	1	1	0	0	3	0	0	0	2	0	12	0	1	1	0	0	3	0	0	0	2	0	12	0	1	1	0	0	3	0	0	0	18.5
547	P51648-2;A0A5F9ZHN9;P51648;A0A5F9ZHI5;J3QRD1;A0A5F9ZGX4;A0A5F9ZI12;A0A5K1VW72;A0A5F9ZHZ9;I3L1M4;A0A5F9ZHP6;J3QS00;J3KTG1;J3QKK9;I3L0X1;K7EN73;A0A0D9SGC3;I3L2W1;I3L3I9;E9PNN6;A8MYB8;P30838;C9JMC5;C9JKT2;E9PJV0;P43353-2;P48448;P43353;J3KTD9	P51648-2;A0A5F9ZHN9;P51648;A0A5F9ZHI5;J3QRD1;A0A5F9ZGX4;A0A5F9ZI12;A0A5K1VW72	19;19;19;17;17;15;14;12;9;8;5;5;4;4;4;2;2;2;1;1;1;1;1;1;1;1;1;1;1	19;19;19;17;17;15;14;12;9;8;5;5;4;4;4;2;2;2;1;1;1;1;1;1;1;1;1;1;1	19;19;19;17;17;15;14;12;9;8;5;5;4;4;4;2;2;2;1;1;1;1;1;1;1;1;1;1;1	Fatty aldehyde dehydrogenase	ALDH3A2	sp|P51648-2|AL3A2_HUMAN Isoform 2 of Aldehyde dehydrogenase family 3 member A2 OS=Homo sapiens OX=9606 GN=ALDH3A2;tr|A0A5F9ZHN9|A0A5F9ZHN9_HUMAN Aldehyde dehydrogenase OS=Homo sapiens OX=9606 GN=ALDH3A2 PE=1 SV=1;sp|P51648|AL3A2_HUMAN Aldehyde dehydrogenas	29	19	19	19	3	0	18	6	4	2	0	0	6	0	1	0	3	0	18	6	4	2	0	0	6	0	1	0	3	0	18	6	4	2	0	0	6	0	1	0	52.6
548	O00255;O00255-2;E7EN32;A0A5F9ZHS3;O00255-3	O00255;O00255-2;E7EN32;A0A5F9ZHS3;O00255-3	2;2;2;2;2	2;2;2;2;2	2;2;2;2;2	Menin	MEN1	sp|O00255|MEN1_HUMAN Menin OS=Homo sapiens OX=9606 GN=MEN1 PE=1 SV=4;sp|O00255-2|MEN1_HUMAN Isoform 2 of Menin OS=Homo sapiens OX=9606 GN=MEN1;tr|E7EN32|E7EN32_HUMAN Menin OS=Homo sapiens OX=9606 GN=MEN1 PE=1 SV=1;tr|A0A5F9ZHS3|A0A5F9ZHS3_HUMAN Menin OS=Ho	5	2	2	2	0	0	0	0	0	0	0	0	0	2	0	0	0	0	0	0	0	0	0	0	0	2	0	0	0	0	0	0	0	0	0	0	0	2	0	0	4.9
549	P49643;A0A5F9ZHU7	P49643;A0A5F9ZHU7	1;1	1;1	1;1	DNA primase large subunit	PRIM2	sp|P49643|PRI2_HUMAN DNA primase large subunit OS=Homo sapiens OX=9606 GN=PRIM2 PE=1 SV=2;tr|A0A5F9ZHU7|A0A5F9ZHU7_HUMAN DNA primase large subunit OS=Homo sapiens OX=9606 GN=PRIM2 PE=1 SV=1	2	1	1	1	0	0	0	0	0	0	0	0	1	0	0	0	0	0	0	0	0	0	0	0	1	0	0	0	0	0	0	0	0	0	0	0	1	0	0	0	2.8
550	Q8WY22;A0A5F9ZHY7	Q8WY22;A0A5F9ZHY7	1;1	1;1	1;1	BRI3-binding protein	BRI3BP	sp|Q8WY22|BRI3B_HUMAN BRI3-binding protein OS=Homo sapiens OX=9606 GN=BRI3BP PE=1 SV=1;tr|A0A5F9ZHY7|A0A5F9ZHY7_HUMAN BRI3-binding protein OS=Homo sapiens OX=9606 GN=BRI3BP PE=1 SV=1	2	1	1	1	0	0	0	0	0	0	0	0	1	0	0	0	0	0	0	0	0	0	0	0	1	0	0	0	0	0	0	0	0	0	0	0	1	0	0	0	7.6
551	Q92974;Q92974-2;V9GYM8;A0A5F9ZI21;Q92974-3;V9GZ14;Q5VY93;V9GYF5;V9GYG5;V9GZ58	Q92974;Q92974-2;V9GYM8;A0A5F9ZI21;Q92974-3	32;32;32;32;32;6;6;5;5;1	32;32;32;32;32;6;6;5;5;1	27;27;27;27;27;6;4;5;5;1	Rho guanine nucleotide exchange factor 2	ARHGEF2	sp|Q92974|ARHG2_HUMAN Rho guanine nucleotide exchange factor 2 OS=Homo sapiens OX=9606 GN=ARHGEF2 PE=1 SV=4;sp|Q92974-2|ARHG2_HUMAN Isoform 2 of Rho guanine nucleotide exchange factor 2 OS=Homo sapiens OX=9606 GN=ARHGEF2;tr|V9GYM8|V9GYM8_HUMAN Guanine nucl	10	32	32	27	0	0	19	0	0	0	0	0	28	4	10	1	0	0	19	0	0	0	0	0	28	4	10	1	0	0	16	0	0	0	0	0	24	4	8	1	45
552	O75530;O75530-2;A0A5F9ZI63;O75530-3;E9PJK2;H0YEL4	O75530;O75530-2;A0A5F9ZI63;O75530-3;E9PJK2	4;4;4;4;3;1	4;4;4;4;3;1	4;4;4;4;3;1	Polycomb protein EED	EED	sp|O75530|EED_HUMAN Polycomb protein EED OS=Homo sapiens OX=9606 GN=EED PE=1 SV=2;sp|O75530-2|EED_HUMAN Isoform 2 of Polycomb protein EED OS=Homo sapiens OX=9606 GN=EED;tr|A0A5F9ZI63|A0A5F9ZI63_HUMAN Polycomb protein EED OS=Homo sapiens OX=9606 GN=EED PE=1	6	4	4	4	0	1	0	2	0	2	0	0	0	3	0	2	0	1	0	2	0	2	0	0	0	3	0	2	0	1	0	2	0	2	0	0	0	3	0	2	10.7
553	O43151;A0A5H1ZRP3;O43151-2;O43151-3	O43151;A0A5H1ZRP3;O43151-2	6;6;4;1	6;6;4;1	6;6;4;1	Methylcytosine dioxygenase TET3	TET3	sp|O43151|TET3_HUMAN Methylcytosine dioxygenase TET3 OS=Homo sapiens OX=9606 GN=TET3 PE=1 SV=4;tr|A0A5H1ZRP3|A0A5H1ZRP3_HUMAN Methylcytosine dioxygenase TET OS=Homo sapiens OX=9606 GN=TET3 PE=1 SV=1;sp|O43151-2|TET3_HUMAN Isoform 2 of Methylcytosine dioxyg	4	6	6	6	0	0	0	0	0	0	0	0	0	0	0	6	0	0	0	0	0	0	0	0	0	0	0	6	0	0	0	0	0	0	0	0	0	0	0	6	4.4
554	Q8WX92;A0A5H1ZRP4;Q8WX92-2	Q8WX92;A0A5H1ZRP4;Q8WX92-2	4;4;4	4;4;4	4;4;4	Negative elongation factor B	NELFB	sp|Q8WX92|NELFB_HUMAN Negative elongation factor B OS=Homo sapiens OX=9606 GN=NELFB PE=1 SV=1;tr|A0A5H1ZRP4|A0A5H1ZRP4_HUMAN Negative elongation factor B OS=Homo sapiens OX=9606 GN=NELFB PE=1 SV=1;sp|Q8WX92-2|NELFB_HUMAN Isoform 2 of Negative elongation fa	3	4	4	4	1	0	0	2	0	0	0	0	2	1	0	0	1	0	0	2	0	0	0	0	2	1	0	0	1	0	0	2	0	0	0	0	2	1	0	0	7.9
555	Q6P9H4;A0A5H1ZRR2;G9CGD6-3;G9CGD6;G9CGD6-2	Q6P9H4;A0A5H1ZRR2;G9CGD6-3;G9CGD6;G9CGD6-2	1;1;1;1;1	1;1;1;1;1	1;1;1;1;1	Connector enhancer of kinase suppressor of ras 3	CNKSR3	sp|Q6P9H4|CNKR3_HUMAN Connector enhancer of kinase suppressor of ras 3 OS=Homo sapiens OX=9606 GN=CNKSR3 PE=1 SV=1;tr|A0A5H1ZRR2|A0A5H1ZRR2_HUMAN Connector enhancer of kinase suppressor of ras 3 OS=Homo sapiens OX=9606 GN=CNKSR3 PE=1 SV=1;sp|G9CGD6-3|CNIPF	5	1	1	1	0	0	1	0	0	0	0	0	0	0	0	0	0	0	1	0	0	0	0	0	0	0	0	0	0	0	1	0	0	0	0	0	0	0	0	0	2.3
556	A0A5H1ZRS1;Q15154-5;E7EV93;E9PGW9;Q15154-3;E5RGQ4	A0A5H1ZRS1;Q15154-5	43;43;13;10;10;8	43;43;13;10;10;8	1;1;0;0;0;0	Pericentriolar material 1 protein	PCM1	tr|A0A5H1ZRS1|A0A5H1ZRS1_HUMAN Pericentriolar material 1 protein OS=Homo sapiens OX=9606 GN=PCM1 PE=1 SV=1;sp|Q15154-5|PCM1_HUMAN Isoform 5 of Pericentriolar material 1 protein OS=Homo sapiens OX=9606 GN=PCM1	6	43	43	1	1	0	32	0	3	0	0	0	25	0	2	0	1	0	32	0	3	0	0	0	25	0	2	0	0	0	1	0	0	0	0	0	1	0	0	0	36.1
557	Q7Z5Q1;A0A5K1VW61;A0A5K1VW79;A0A5K1VW71;A0A5K1VW93;Q7Z5Q1-7;Q7Z5Q1-5;Q7Z5Q1-4;Q7Z5Q1-6;Q7Z5Q1-3;Q7Z5Q1-8;Q7Z5Q1-9;Q8NE35;H0Y9D9;Q8NE35-2	Q7Z5Q1;A0A5K1VW61;A0A5K1VW79;A0A5K1VW71;A0A5K1VW93;Q7Z5Q1-7;Q7Z5Q1-5;Q7Z5Q1-4;Q7Z5Q1-6;Q7Z5Q1-3;Q7Z5Q1-8;Q7Z5Q1-9;Q8NE35;H0Y9D9;Q8NE35-2	8;8;8;8;8;8;8;8;8;8;8;8;7;7;7	2;2;2;2;2;2;2;2;2;2;2;2;1;2;1	2;2;2;2;2;2;2;2;2;2;2;2;1;2;1	Cytoplasmic polyadenylation element-binding protein 2;Cytoplasmic polyadenylation element-binding protein 3	CPEB2;CPEB3	sp|Q7Z5Q1|CPEB2_HUMAN Cytoplasmic polyadenylation element-binding protein 2 OS=Homo sapiens OX=9606 GN=CPEB2 PE=2 SV=3;tr|A0A5K1VW61|A0A5K1VW61_HUMAN Cytoplasmic polyadenylation element-binding protein 2 OS=Homo sapiens OX=9606 GN=CPEB2 PE=1 SV=1;tr|A0A5K1	15	8	2	2	4	2	1	0	5	2	4	3	3	0	5	2	0	0	0	0	1	0	1	0	0	0	1	0	0	0	0	0	1	0	1	0	0	0	1	0	18.3
558	P54819;F8VY04;A0A5K1VW67;F8W1A4;P54819-6;P54819-5;P54819-2	P54819;F8VY04;A0A5K1VW67;F8W1A4;P54819-6;P54819-5;P54819-2	1;1;1;1;1;1;1	1;1;1;1;1;1;1	1;1;1;1;1;1;1	Adenylate kinase 2, mitochondrial;Adenylate kinase 2, mitochondrial, N-terminally processed;Adenylate kinase 2, mitochondrial	AK2	sp|P54819|KAD2_HUMAN Adenylate kinase 2, mitochondrial OS=Homo sapiens OX=9606 GN=AK2 PE=1 SV=2;tr|F8VY04|F8VY04_HUMAN Nucleoside-diphosphate kinase OS=Homo sapiens OX=9606 GN=AK2 PE=1 SV=1;tr|A0A5K1VW67|A0A5K1VW67_HUMAN Nucleoside-diphosphate kinase OS=Ho	7	1	1	1	0	0	1	0	0	0	0	0	0	0	0	0	0	0	1	0	0	0	0	0	0	0	0	0	0	0	1	0	0	0	0	0	0	0	0	0	6.7
559	P40925;B8ZZ51;B9A041;A0A5K1VW95;P40925-2;P40925-3;C9JF79	P40925;B8ZZ51;B9A041;A0A5K1VW95;P40925-2;P40925-3	3;3;3;3;3;3;1	3;3;3;3;3;3;1	3;3;3;3;3;3;1	Malate dehydrogenase, cytoplasmic	MDH1	sp|P40925|MDHC_HUMAN Malate dehydrogenase, cytoplasmic OS=Homo sapiens OX=9606 GN=MDH1 PE=1 SV=4;tr|B8ZZ51|B8ZZ51_HUMAN Malate dehydrogenase, cytoplasmic OS=Homo sapiens OX=9606 GN=MDH1 PE=1 SV=1;tr|B9A041|B9A041_HUMAN Malate dehydrogenase, cytoplasmic OS=	7	3	3	3	2	0	0	0	0	0	1	0	0	0	0	0	2	0	0	0	0	0	1	0	0	0	0	0	2	0	0	0	0	0	1	0	0	0	0	0	12.6
560	Q92824;B1AMG5;A0A669KA35;Q92824-2	Q92824;B1AMG5;A0A669KA35;Q92824-2	1;1;1;1	1;1;1;1	1;1;1;1	Proprotein convertase subtilisin/kexin type 5	PCSK5	sp|Q92824|PCSK5_HUMAN Proprotein convertase subtilisin/kexin type 5 OS=Homo sapiens OX=9606 GN=PCSK5 PE=1 SV=4;tr|B1AMG5|B1AMG5_HUMAN Proprotein convertase subtilisin/kexin type 5 OS=Homo sapiens OX=9606 GN=PCSK5 PE=1 SV=1;tr|A0A669KA35|A0A669KA35_HUMAN Pr	4	1	1	1	0	0	1	0	0	0	0	0	0	0	0	0	0	0	1	0	0	0	0	0	0	0	0	0	0	0	1	0	0	0	0	0	0	0	0	0	0.7
561	M0QXA7;A0A669KBH9;A0A669KAV7;O95785-3;B9EGQ5;A0A669KBG4;O95785-4;O95785;A0A2R8YFV2;O95785-2	M0QXA7;A0A669KBH9;A0A669KAV7;O95785-3;B9EGQ5;A0A669KBG4;O95785-4;O95785;A0A2R8YFV2;O95785-2	19;19;19;19;18;18;18;17;17;16	19;19;19;19;18;18;18;17;17;16	19;19;19;19;18;18;18;17;17;16	Protein Wiz	WIZ	tr|M0QXA7|M0QXA7_HUMAN Protein Wiz OS=Homo sapiens OX=9606 GN=WIZ PE=1 SV=1;tr|A0A669KBH9|A0A669KBH9_HUMAN Protein Wiz OS=Homo sapiens OX=9606 GN=WIZ PE=1 SV=1;tr|A0A669KAV7|A0A669KAV7_HUMAN Protein Wiz OS=Homo sapiens OX=9606 GN=WIZ PE=1 SV=1;sp|O95785-3|	10	19	19	19	0	4	0	3	0	5	0	6	0	14	0	10	0	4	0	3	0	5	0	6	0	14	0	10	0	4	0	3	0	5	0	6	0	14	0	10	29.8
562	O76024;A0A669KAX3;H0Y9G5;A0A669KBF0;A0A669KB26	O76024;A0A669KAX3;H0Y9G5	12;12;9;5;2	12;12;9;5;2	12;12;9;5;2	Wolframin	WFS1	sp|O76024|WFS1_HUMAN Wolframin OS=Homo sapiens OX=9606 GN=WFS1 PE=1 SV=2;tr|A0A669KAX3|A0A669KAX3_HUMAN Wolframin OS=Homo sapiens OX=9606 GN=WFS1 PE=1 SV=1;tr|H0Y9G5|H0Y9G5_HUMAN Wolframin OS=Homo sapiens OX=9606 GN=WFS1 PE=1 SV=2	5	12	12	12	0	1	5	0	0	0	2	0	8	1	2	0	0	1	5	0	0	0	2	0	8	1	2	0	0	1	5	0	0	0	2	0	8	1	2	0	16.5
563	Q5T653;A0A669KAX9;C9IY40	Q5T653;A0A669KAX9;C9IY40	6;6;3	6;6;3	6;6;3	39S ribosomal protein L2, mitochondrial	MRPL2	sp|Q5T653|RM02_HUMAN 39S ribosomal protein L2, mitochondrial OS=Homo sapiens OX=9606 GN=MRPL2 PE=1 SV=2;tr|A0A669KAX9|A0A669KAX9_HUMAN Ribosomal_L2_C domain-containing protein (Fragment) OS=Homo sapiens OX=9606 PE=4 SV=1;tr|C9IY40|C9IY40_HUMAN 39S ribosoma	3	6	6	6	0	0	5	0	0	0	0	0	4	0	0	0	0	0	5	0	0	0	0	0	4	0	0	0	0	0	5	0	0	0	0	0	4	0	0	0	31.8
564	Q92538;Q92538-2;A0A669KB10;A0A669KBG8;Q92538-3	Q92538;Q92538-2;A0A669KB10;A0A669KBG8;Q92538-3	23;23;23;23;23	23;23;23;23;23	23;23;23;23;23	Golgi-specific brefeldin A-resistance guanine nucleotide exchange factor 1	GBF1	sp|Q92538|GBF1_HUMAN Golgi-specific brefeldin A-resistance guanine nucleotide exchange factor 1 OS=Homo sapiens OX=9606 GN=GBF1 PE=1 SV=2;sp|Q92538-2|GBF1_HUMAN Isoform 2 of Golgi-specific brefeldin A-resistance guanine nucleotide exchange factor 1 OS=Homo	5	23	23	23	0	0	17	0	0	0	0	0	16	0	0	0	0	0	17	0	0	0	0	0	16	0	0	0	0	0	17	0	0	0	0	0	16	0	0	0	18.8
565	Q9P0U4;A0A669KB29;Q9P0U4-2;K7EQZ1;K7EQ21;K7EJR0;K7EKZ6	Q9P0U4;A0A669KB29;Q9P0U4-2;K7EQZ1;K7EQ21	10;10;10;8;8;2;2	10;10;10;8;8;2;2	10;10;10;8;8;2;2	CXXC-type zinc finger protein 1	CXXC1	sp|Q9P0U4|CXXC1_HUMAN CXXC-type zinc finger protein 1 OS=Homo sapiens OX=9606 GN=CXXC1 PE=1 SV=2;tr|A0A669KB29|A0A669KB29_HUMAN CXXC-type zinc finger protein 1 OS=Homo sapiens OX=9606 GN=CXXC1 PE=1 SV=1;sp|Q9P0U4-2|CXXC1_HUMAN Isoform 2 of CXXC-type zinc f	7	10	10	10	0	3	0	4	0	4	0	5	0	8	0	8	0	3	0	4	0	4	0	5	0	8	0	8	0	3	0	4	0	4	0	5	0	8	0	8	19.1
566	P42224;A0A669KB53;A0A669KBA4;A0A669KB56;A0A669KB68;A0A669KBI6;P42224-2;J3KPM9;A0A669KB52;A0A669KB75;E7EPD2;A0A669KB17;D2KFR9;E7ENM1;E9PH66;Q67C41;Q14765;A0A669KBK4	P42224;A0A669KB53;A0A669KBA4;A0A669KB56;A0A669KB68;A0A669KBI6;P42224-2;J3KPM9;A0A669KB52;A0A669KB75;E7EPD2	29;29;29;29;29;27;27;26;23;21;17;12;10;8;4;3;1;1	29;29;29;29;29;27;27;26;23;21;17;12;10;8;4;3;1;1	29;29;29;29;29;27;27;26;23;21;17;12;10;8;4;3;1;1	Signal transducer and activator of transcription 1-alpha/beta;Signal transducer and activator of transcription	STAT1	sp|P42224|STAT1_HUMAN Signal transducer and activator of transcription 1-alpha/beta OS=Homo sapiens OX=9606 GN=STAT1 PE=1 SV=2;tr|A0A669KB53|A0A669KB53_HUMAN Signal transducer and activator of transcription OS=Homo sapiens OX=9606 GN=STAT1 PE=1 SV=1;tr|A0A	18	29	29	29	15	1	22	7	17	1	5	0	14	5	10	0	15	1	22	7	17	1	5	0	14	5	10	0	15	1	22	7	17	1	5	0	14	5	10	0	53.5
567	P11137;P11137-4;P11137-3;P11137-2;A0A669KB77;E7EV03;H7BZB9;A8MZ31	P11137;P11137-4;P11137-3;P11137-2;A0A669KB77	8;8;8;8;8;3;2;1	8;8;8;8;8;3;2;1	8;8;8;8;8;3;2;1	Microtubule-associated protein 2	MAP2	sp|P11137|MTAP2_HUMAN Microtubule-associated protein 2 OS=Homo sapiens OX=9606 GN=MAP2 PE=1 SV=4;sp|P11137-4|MTAP2_HUMAN Isoform 4 of Microtubule-associated protein 2 OS=Homo sapiens OX=9606 GN=MAP2;sp|P11137-3|MTAP2_HUMAN Isoform 3 of Microtubule-associat	8	8	8	8	3	0	7	0	4	0	0	0	0	0	0	0	3	0	7	0	4	0	0	0	0	0	0	0	3	0	7	0	4	0	0	0	0	0	0	0	5.9
568	Q8NBP7;A0A669KBG0;A0A669KB81;Q8NBP7-2	Q8NBP7;A0A669KBG0;A0A669KB81;Q8NBP7-2	2;2;1;1	2;2;1;1	2;2;1;1	Proprotein convertase subtilisin/kexin type 9	PCSK9	sp|Q8NBP7|PCSK9_HUMAN Proprotein convertase subtilisin/kexin type 9 OS=Homo sapiens OX=9606 GN=PCSK9 PE=1 SV=3;tr|A0A669KBG0|A0A669KBG0_HUMAN Proprotein convertase 9 OS=Homo sapiens OX=9606 GN=PCSK9 PE=1 SV=1;tr|A0A669KB81|A0A669KB81_HUMAN Proprotein conve	4	2	2	2	0	0	0	0	2	0	0	0	0	0	0	0	0	0	0	0	2	0	0	0	0	0	0	0	0	0	0	0	2	0	0	0	0	0	0	0	3.9
569	Q9UMN6;A0A669KBI7;Q9UMN6-2;A0A669KAX8;A0A669KBD5	Q9UMN6;A0A669KBI7	13;13;2;1;1	13;13;2;1;1	13;13;2;1;1	Histone-lysine N-methyltransferase 2B	KMT2B	sp|Q9UMN6|KMT2B_HUMAN Histone-lysine N-methyltransferase 2B OS=Homo sapiens OX=9606 GN=KMT2B PE=1 SV=1;tr|A0A669KBI7|A0A669KBI7_HUMAN [Histone H3]-lysine(4) N-trimethyltransferase OS=Homo sapiens OX=9606 GN=KMT2B PE=1 SV=1	5	13	13	13	0	4	0	6	0	7	0	1	0	1	0	6	0	4	0	6	0	7	0	1	0	1	0	6	0	4	0	6	0	7	0	1	0	1	0	6	8.2
570	Q93009;A0A669KBL1;Q93009-3;H3BND8;F5H2X1;H3BMF6;H3BUV0;H3BTM1;H3BRA2;H3BQD1	Q93009;A0A669KBL1;Q93009-3;H3BND8	21;21;21;17;7;1;1;1;1;1	21;21;21;17;7;1;1;1;1;1	21;21;21;17;7;1;1;1;1;1	Ubiquitin carboxyl-terminal hydrolase 7;Ubiquitin carboxyl-terminal hydrolase	USP7	sp|Q93009|UBP7_HUMAN Ubiquitin carboxyl-terminal hydrolase 7 OS=Homo sapiens OX=9606 GN=USP7 PE=1 SV=2;tr|A0A669KBL1|A0A669KBL1_HUMAN Ubiquitin carboxyl-terminal hydrolase 7 OS=Homo sapiens OX=9606 GN=USP7 PE=1 SV=1;sp|Q93009-3|UBP7_HUMAN Isoform 3 of Ubiq	10	21	21	21	0	12	0	10	0	9	1	5	5	5	14	8	0	12	0	10	0	9	1	5	5	5	14	8	0	12	0	10	0	9	1	5	5	5	14	8	27.9
571	Q14541;A0A6E1WB48;Q14541-2	Q14541;A0A6E1WB48;Q14541-2	5;5;5	3;3;3	3;3;3	Hepatocyte nuclear factor 4-gamma	HNF4G	sp|Q14541|HNF4G_HUMAN Hepatocyte nuclear factor 4-gamma OS=Homo sapiens OX=9606 GN=HNF4G PE=1 SV=3;tr|A0A6E1WB48|A0A6E1WB48_HUMAN Hepatocyte nuclear factor 4-gamma OS=Homo sapiens OX=9606 GN=HNF4G PE=4 SV=1;sp|Q14541-2|HNF4G_HUMAN Isoform 2 of Hepatocyte n	3	5	3	3	0	2	1	2	0	2	0	1	1	5	0	2	0	0	0	0	0	0	0	0	0	3	0	0	0	0	0	0	0	0	0	0	0	3	0	0	19.1
572	P11474;A0A6E1WCP9;P11474-2;O95718;F5H0E9;H0YGT3;E7EWD9;A0A2R8Y491;O95718-2;O95718-1	P11474;A0A6E1WCP9;P11474-2;O95718;F5H0E9;H0YGT3;E7EWD9;A0A2R8Y491;O95718-2;O95718-1	2;2;2;1;1;1;1;1;1;1	2;2;2;1;1;1;1;1;1;1	2;2;2;1;1;1;1;1;1;1	Steroid hormone receptor ERR1;Steroid hormone receptor ERR2	ESRRA;ESRRB	sp|P11474|ERR1_HUMAN Steroid hormone receptor ERR1 OS=Homo sapiens OX=9606 GN=ESRRA PE=1 SV=3;tr|A0A6E1WCP9|A0A6E1WCP9_HUMAN Steroid hormone receptor ERR1 OS=Homo sapiens OX=9606 GN=ESRRA PE=4 SV=1;sp|P11474-2|ERR1_HUMAN Isoform 2 of Steroid hormone recept	10	2	2	2	0	0	0	2	0	0	0	0	0	1	0	0	0	0	0	2	0	0	0	0	0	1	0	0	0	0	0	2	0	0	0	0	0	1	0	0	8
573	Q9P2J5;A0A6I8PL42;A0A6I8PIT3;A0A6I8PIV1;A0A6I8PRS0;B4DER1;Q9P2J5-2;A0A6I8PS05;A0A6I8PLB8;A0A6I8PLB3;A0A6I8PIP7;A0A6I8PTV8;A0A6I8PRU9;Q9P2J5-3;A0A6I8PRP1	Q9P2J5;A0A6I8PL42;A0A6I8PIT3;A0A6I8PIV1;A0A6I8PRS0;B4DER1;Q9P2J5-2;A0A6I8PS05;A0A6I8PLB8;A0A6I8PLB3;A0A6I8PIP7;A0A6I8PTV8	35;35;35;35;34;34;34;33;33;32;26;20;16;14;4	35;35;35;35;34;34;34;33;33;32;26;20;16;14;4	35;35;35;35;34;34;34;33;33;32;26;20;16;14;4	Leucine--tRNA ligase, cytoplasmic	LARS	sp|Q9P2J5|SYLC_HUMAN Leucine--tRNA ligase, cytoplasmic OS=Homo sapiens OX=9606 GN=LARS1 PE=1 SV=2;tr|A0A6I8PL42|A0A6I8PL42_HUMAN Leucine--tRNA ligase, cytoplasmic OS=Homo sapiens OX=9606 GN=LARS1 PE=4 SV=1;tr|A0A6I8PIT3|A0A6I8PIT3_HUMAN Leucine--tRNA ligas	15	35	35	35	1	0	28	0	1	0	0	0	24	0	4	0	1	0	28	0	1	0	0	0	24	0	4	0	1	0	28	0	1	0	0	0	24	0	4	0	37.8
574	O95425;O95425-2;A0A6I8PIX7;O95425-4;O95425-3;A0A0J9YWY6	O95425;O95425-2;A0A6I8PIX7;O95425-4;O95425-3	4;4;4;4;4;1	4;4;4;4;4;1	4;4;4;4;4;1	Supervillin	SVIL	sp|O95425|SVIL_HUMAN Supervillin OS=Homo sapiens OX=9606 GN=SVIL PE=1 SV=2;sp|O95425-2|SVIL_HUMAN Isoform 2 of Supervillin OS=Homo sapiens OX=9606 GN=SVIL;tr|A0A6I8PIX7|A0A6I8PIX7_HUMAN Supervillin OS=Homo sapiens OX=9606 GN=SVIL PE=4 SV=1;sp|O95425-4|SVIL	6	4	4	4	0	0	0	0	0	0	0	0	1	2	2	2	0	0	0	0	0	0	0	0	1	2	2	2	0	0	0	0	0	0	0	0	1	2	2	2	2.3
575	O95490;O95490-6;A0A6I8PRJ0;H0Y5C0;B1ALU1;A0A6I8PRM6;A0A6I8PTT2;O95490-7;B1ALU3;O95490-5;O95490-2;O95490-4;O95490-3;A0A6I8PUE4;A0A6I8PRQ0;A0A6I8PLG0;A0A6I8PIV6;O94910-2;O94910;K7EK47;H0Y3V3;K7ERC3	O95490;O95490-6;A0A6I8PRJ0;H0Y5C0;B1ALU1;A0A6I8PRM6;A0A6I8PTT2;O95490-7;B1ALU3;O95490-5;O95490-2;O95490-4;O95490-3;A0A6I8PUE4;A0A6I8PRQ0;A0A6I8PLG0;A0A6I8PIV6	7;7;7;7;7;7;7;7;7;7;7;6;6;6;6;6;6;1;1;1;1;1	7;7;7;7;7;7;7;7;7;7;7;6;6;6;6;6;6;1;1;1;1;1	7;7;7;7;7;7;7;7;7;7;7;6;6;6;6;6;6;1;1;1;1;1	Latrophilin-2	LPHN2;ADGRL2	sp|O95490|AGRL2_HUMAN Adhesion G protein-coupled receptor L2 OS=Homo sapiens OX=9606 GN=ADGRL2 PE=1 SV=2;sp|O95490-6|AGRL2_HUMAN Isoform 6 of Adhesion G protein-coupled receptor L2 OS=Homo sapiens OX=9606 GN=ADGRL2;tr|A0A6I8PRJ0|A0A6I8PRJ0_HUMAN Adhesion G	22	7	7	7	0	0	5	0	1	0	0	0	2	0	0	0	0	0	5	0	1	0	0	0	2	0	0	0	0	0	5	0	1	0	0	0	2	0	0	0	6.6
576	Q92802;A0A6I8PRM1;D6R968;A0A6I8PU16;Q92802-2;A0A6I8PRT3;A0A6I8PRX5;A0A6I8PRV3;A0A6I8PRE0;A0A6I8PRR0;A0A6I8PS46	Q92802;A0A6I8PRM1;D6R968;A0A6I8PU16;Q92802-2;A0A6I8PRT3;A0A6I8PRX5;A0A6I8PRV3;A0A6I8PRE0	4;4;4;4;4;3;3;3;3;1;1	4;4;4;4;4;3;3;3;3;1;1	4;4;4;4;4;3;3;3;3;1;1	NEDD4-binding protein 2-like 2	N4BP2L2	sp|Q92802|N42L2_HUMAN NEDD4-binding protein 2-like 2 OS=Homo sapiens OX=9606 GN=N4BP2L2 PE=1 SV=1;tr|A0A6I8PRM1|A0A6I8PRM1_HUMAN NEDD4-binding protein 2-like 2 OS=Homo sapiens OX=9606 GN=N4BP2L2 PE=4 SV=1;tr|D6R968|D6R968_HUMAN NEDD4-binding protein 2-like	11	4	4	4	0	2	0	0	0	1	0	3	0	0	0	3	0	2	0	0	0	1	0	3	0	0	0	3	0	2	0	0	0	1	0	3	0	0	0	3	9.9
577	Q06210;Q06210-2;A0A6I8PTT9;A0A6I8PRN4;O94808;A0A6I8PRT6;E5RJP4	Q06210;Q06210-2;A0A6I8PTT9;A0A6I8PRN4	11;11;11;10;3;1;1	11;11;11;10;3;1;1	11;11;11;10;3;1;1	Glutamine--fructose-6-phosphate aminotransferase [isomerizing] 1	GFPT1	sp|Q06210|GFPT1_HUMAN Glutamine--fructose-6-phosphate aminotransferase [isomerizing] 1 OS=Homo sapiens OX=9606 GN=GFPT1 PE=1 SV=3;sp|Q06210-2|GFPT1_HUMAN Isoform 2 of Glutamine--fructose-6-phosphate aminotransferase [isomerizing] 1 OS=Homo sapiens OX=9606	7	11	11	11	2	0	1	0	6	0	3	0	6	0	6	1	2	0	1	0	6	0	3	0	6	0	6	1	2	0	1	0	6	0	3	0	6	0	6	1	21.7
578	A0A6I8PTU7;A0A1B0GU09;A0A1B0GU65;A0A1B0GWI8	A0A6I8PTU7	17;5;3;1	2;0;0;1	2;0;0;1			tr|A0A6I8PTU7|A0A6I8PTU7_HUMAN AT-rich interactive domain-containing protein 1B (Fragment) OS=Homo sapiens OX=9606 GN=ARID1B PE=4 SV=1	4	17	2	2	12	17	1	16	11	17	5	16	0	12	3	16	1	2	0	2	1	2	1	2	0	1	0	2	1	2	0	2	1	2	1	2	0	1	0	2	68
579	Q9UL18;Q5TA58;A0A6I8PTZ8	Q9UL18;Q5TA58;A0A6I8PTZ8	12;12;12	2;2;2	2;2;2	Protein argonaute-1;Protein argonaute	AGO1	sp|Q9UL18|AGO1_HUMAN Protein argonaute-1 OS=Homo sapiens OX=9606 GN=AGO1 PE=1 SV=3;tr|Q5TA58|Q5TA58_HUMAN Protein argonaute-1 OS=Homo sapiens OX=9606 GN=AGO1 PE=1 SV=1;tr|A0A6I8PTZ8|A0A6I8PTZ8_HUMAN Protein argonaute-1 OS=Homo sapiens OX=9606 GN=AGO1 PE=4	3	12	2	2	9	0	3	0	4	1	4	2	4	3	5	3	1	0	0	0	0	0	0	0	1	0	0	0	1	0	0	0	0	0	0	0	1	0	0	0	18.4
580	A0AV96;A0AV96-2;B7Z8Z7;D6R9D6;D6RBS9;D6RBP6;D6RA49;D6RFL5;D6R9M7;D6REZ6;D6RCT1	A0AV96;A0AV96-2;B7Z8Z7;D6R9D6	10;10;9;8;4;3;3;3;3;3;2	9;9;8;7;3;3;3;3;3;3;2	9;9;8;7;3;3;3;3;3;3;2	RNA-binding protein 47	RBM47	sp|A0AV96|RBM47_HUMAN RNA-binding protein 47 OS=Homo sapiens OX=9606 GN=RBM47 PE=1 SV=2;sp|A0AV96-2|RBM47_HUMAN Isoform 2 of RNA-binding protein 47 OS=Homo sapiens OX=9606 GN=RBM47;tr|B7Z8Z7|B7Z8Z7_HUMAN RNA-binding motif protein 47 OS=Homo sapiens OX=9606	11	10	9	9	1	4	2	6	0	4	0	1	8	5	0	2	1	3	2	5	0	3	0	1	7	4	0	2	1	3	2	5	0	3	0	1	7	4	0	2	25.8
581	A0JNW5;A0A0C4DGH6;A0JNW5-2;F8W665;F8W1I2;F8VW65;H0YHT7	A0JNW5;A0A0C4DGH6	9;7;4;2;1;1;1	9;7;4;2;1;1;1	9;7;4;2;1;1;1	UHRF1-binding protein 1-like	UHRF1BP1L	sp|A0JNW5|UH1BL_HUMAN UHRF1-binding protein 1-like OS=Homo sapiens OX=9606 GN=UHRF1BP1L PE=1 SV=2;tr|A0A0C4DGH6|A0A0C4DGH6_HUMAN UHRF1-binding protein 1-like OS=Homo sapiens OX=9606 GN=UHRF1BP1L PE=1 SV=1	7	9	9	9	0	0	5	0	4	0	0	0	1	0	4	0	0	0	5	0	4	0	0	0	1	0	4	0	0	0	5	0	4	0	0	0	1	0	4	0	9.3
582	A0PJW6;G5EA27;H0YCK4	A0PJW6	3;1;1	3;1;1	3;1;1	Transmembrane protein 223	TMEM223	sp|A0PJW6|TM223_HUMAN Transmembrane protein 223 OS=Homo sapiens OX=9606 GN=TMEM223 PE=1 SV=1	3	3	3	3	0	0	2	0	0	0	0	0	1	0	0	0	0	0	2	0	0	0	0	0	1	0	0	0	0	0	2	0	0	0	0	0	1	0	0	0	8.4
583	A0PK00;H0YG77	A0PK00;H0YG77	3;2	3;2	3;2	Transmembrane protein 120B	TMEM120B	sp|A0PK00|T120B_HUMAN Transmembrane protein 120B OS=Homo sapiens OX=9606 GN=TMEM120B PE=1 SV=1;tr|H0YG77|H0YG77_HUMAN Transmembrane protein 120B (Fragment) OS=Homo sapiens OX=9606 GN=TMEM120B PE=1 SV=1	2	3	3	3	0	0	3	0	0	0	0	0	0	0	0	0	0	0	3	0	0	0	0	0	0	0	0	0	0	0	3	0	0	0	0	0	0	0	0	0	10.3
584	A1KXE4;A1KXE4-2	A1KXE4;A1KXE4-2	4;2	4;2	4;2	Myelin-associated neurite-outgrowth inhibitor	FAM168B	sp|A1KXE4|F168B_HUMAN Myelin-associated neurite-outgrowth inhibitor OS=Homo sapiens OX=9606 GN=FAM168B PE=1 SV=1;sp|A1KXE4-2|F168B_HUMAN Isoform 2 of Myelin-associated neurite-outgrowth inhibitor OS=Homo sapiens OX=9606 GN=FAM168B	2	4	4	4	2	0	1	0	2	0	4	0	2	0	4	0	2	0	1	0	2	0	4	0	2	0	4	0	2	0	1	0	2	0	4	0	2	0	4	0	52.3
585	A1L020;Q6ZN04	A1L020	12;1	12;1	11;0	RNA-binding protein MEX3A	MEX3A	sp|A1L020|MEX3A_HUMAN RNA-binding protein MEX3A OS=Homo sapiens OX=9606 GN=MEX3A PE=1 SV=1	2	12	12	11	1	0	0	0	4	0	7	0	4	0	11	0	1	0	0	0	4	0	7	0	4	0	11	0	1	0	0	0	3	0	6	0	3	0	10	0	39.8
586	A1L0T0;M0R026;E9PJS0;M0QZX5;E9PL44;M0R1B5;E9PNL1	A1L0T0;M0R026	14;11;6;5;4;3;1	14;11;6;5;4;3;1	14;11;6;5;4;3;1	Acetolactate synthase-like protein	ILVBL	sp|A1L0T0|HACL2_HUMAN 2-hydroxyacyl-CoA lyase 2 OS=Homo sapiens OX=9606 GN=ILVBL PE=1 SV=2;tr|M0R026|M0R026_HUMAN 2-hydroxyacyl-CoA lyase 2 OS=Homo sapiens OX=9606 GN=ILVBL PE=1 SV=1	7	14	14	14	0	0	6	0	5	0	1	0	12	0	2	0	0	0	6	0	5	0	1	0	12	0	2	0	0	0	6	0	5	0	1	0	12	0	2	0	36.1
587	A1L390;A1L390-3;A0A0U1RR71;G3V311;A1L390-2	A1L390;A1L390-3;A0A0U1RR71;G3V311;A1L390-2	2;2;1;1;1	2;2;1;1;1	2;2;1;1;1	Pleckstrin homology domain-containing family G member 3	PLEKHG3	sp|A1L390|PKHG3_HUMAN Pleckstrin homology domain-containing family G member 3 OS=Homo sapiens OX=9606 GN=PLEKHG3 PE=1 SV=1;sp|A1L390-3|PKHG3_HUMAN Isoform 3 of Pleckstrin homology domain-containing family G member 3 OS=Homo sapiens OX=9606 GN=PLEKHG3;tr|A0	5	2	2	2	0	0	0	1	0	0	0	0	1	0	0	0	0	0	0	1	0	0	0	0	1	0	0	0	0	0	0	1	0	0	0	0	1	0	0	0	2.5
588	A1X283	A1X283	2	1	1	SH3 and PX domain-containing protein 2B	SH3PXD2B	sp|A1X283|SPD2B_HUMAN SH3 and PX domain-containing protein 2B OS=Homo sapiens OX=9606 GN=SH3PXD2B PE=1 SV=3	1	2	1	1	0	0	0	0	1	0	1	0	2	0	0	0	0	0	0	0	1	0	0	0	1	0	0	0	0	0	0	0	1	0	0	0	1	0	0	0	3.1
589	Q99798;A2A274	Q99798;A2A274	5;5	5;5	5;5	Aconitate hydratase, mitochondrial	ACO2	sp|Q99798|ACON_HUMAN Aconitate hydratase, mitochondrial OS=Homo sapiens OX=9606 GN=ACO2 PE=1 SV=2;tr|A2A274|A2A274_HUMAN Aconitate hydratase, mitochondrial OS=Homo sapiens OX=9606 GN=ACO2 PE=1 SV=1	2	5	5	5	0	0	0	0	0	0	5	0	0	0	0	0	0	0	0	0	0	0	5	0	0	0	0	0	0	0	0	0	0	0	5	0	0	0	0	0	8.7
590	Q9Y312;A2A2Q9	Q9Y312;A2A2Q9	7;7	7;7	7;7	Protein AAR2 homolog	AAR2	sp|Q9Y312|AAR2_HUMAN Protein AAR2 homolog OS=Homo sapiens OX=9606 GN=AAR2 PE=1 SV=2;tr|A2A2Q9|A2A2Q9_HUMAN AAR2 splicing factor homolog OS=Homo sapiens OX=9606 GN=AAR2 PE=1 SV=1	2	7	7	7	0	0	7	0	1	0	0	0	2	0	0	0	0	0	7	0	1	0	0	0	2	0	0	0	0	0	7	0	1	0	0	0	2	0	0	0	26
591	A2A305;A0A0D9SFI5	A2A305	17;8	1;1	1;1		UBAP2	tr|A2A305|A2A305_HUMAN Ubiquitin-associated protein 2 (Fragment) OS=Homo sapiens OX=9606 GN=UBAP2 PE=1 SV=1	2	17	1	1	11	0	5	0	15	0	11	2	7	2	15	5	0	0	0	0	0	0	1	0	0	0	1	0	0	0	0	0	0	0	1	0	0	0	1	0	56.8
592	A2AJT9;A2AJT9-2;A2AJT9-3;H7BXX2;F2Z385	A2AJT9;A2AJT9-2;A2AJT9-3;H7BXX2;F2Z385	12;12;11;7;6	12;12;11;7;6	12;12;11;7;6	Uncharacterized protein CXorf23	CXorf23	sp|A2AJT9|BCLA3_HUMAN BCLAF1 and THRAP3 family member 3 OS=Homo sapiens OX=9606 GN=BCLAF3 PE=1 SV=1;sp|A2AJT9-2|BCLA3_HUMAN Isoform 2 of BCLAF1 and THRAP3 family member 3 OS=Homo sapiens OX=9606 GN=BCLAF3;sp|A2AJT9-3|BCLA3_HUMAN Isoform 3 of BCLAF1 and THR	5	12	12	12	0	2	0	0	0	2	0	9	0	0	0	8	0	2	0	0	0	2	0	9	0	0	0	8	0	2	0	0	0	2	0	9	0	0	0	8	25.9
593	A2RRP1;A2RRP1-2;H0Y5G7;H7C007	A2RRP1;A2RRP1-2;H0Y5G7	7;7;6;1	7;7;6;1	7;7;6;1	Neuroblastoma-amplified sequence	NBAS	sp|A2RRP1|NBAS_HUMAN Neuroblastoma-amplified sequence OS=Homo sapiens OX=9606 GN=NBAS PE=1 SV=2;sp|A2RRP1-2|NBAS_HUMAN Isoform 2 of Neuroblastoma-amplified sequence OS=Homo sapiens OX=9606 GN=NBAS;tr|H0Y5G7|H0Y5G7_HUMAN Neuroblastoma-amplified sequence (Fr	4	7	7	7	0	0	3	0	0	0	0	0	5	0	0	0	0	0	3	0	0	0	0	0	5	0	0	0	0	0	3	0	0	0	0	0	5	0	0	0	4.9
594	A3KMH1;A3KMH1-3;A3KMH1-2	A3KMH1;A3KMH1-3;A3KMH1-2	19;19;11	19;19;11	19;19;11	von Willebrand factor A domain-containing protein 8	VWA8	sp|A3KMH1|VWA8_HUMAN von Willebrand factor A domain-containing protein 8 OS=Homo sapiens OX=9606 GN=VWA8 PE=1 SV=2;sp|A3KMH1-3|VWA8_HUMAN Isoform 3 of von Willebrand factor A domain-containing protein 8 OS=Homo sapiens OX=9606 GN=VWA8;sp|A3KMH1-2|VWA8_HUMA	3	19	19	19	1	1	13	2	6	1	1	1	5	1	1	2	1	1	13	2	6	1	1	1	5	1	1	2	1	1	13	2	6	1	1	1	5	1	1	2	14.1
595	A4D1E9;C9J8R7;C9JNI1;A4D1E9-2;C9JEQ8	A4D1E9;C9J8R7;C9JNI1;A4D1E9-2	4;3;3;2;1	4;3;3;2;1	4;3;3;2;1	GTP-binding protein 10	GTPBP10	sp|A4D1E9|GTPBA_HUMAN GTP-binding protein 10 OS=Homo sapiens OX=9606 GN=GTPBP10 PE=1 SV=1;tr|C9J8R7|C9J8R7_HUMAN GTP-binding protein 10 (Fragment) OS=Homo sapiens OX=9606 GN=GTPBP10 PE=1 SV=1;tr|C9JNI1|C9JNI1_HUMAN GTP-binding protein 10 (Fragment) OS=Homo	5	4	4	4	0	0	1	0	0	0	0	0	3	0	0	0	0	0	1	0	0	0	0	0	3	0	0	0	0	0	1	0	0	0	0	0	3	0	0	0	13.2
596	A4D1P6;C9J1X0;A4D1P6-2;A4D1P6-3	A4D1P6;C9J1X0;A4D1P6-2;A4D1P6-3	5;5;5;4	5;5;5;4	5;5;5;4	WD repeat-containing protein 91	WDR91	sp|A4D1P6|WDR91_HUMAN WD repeat-containing protein 91 OS=Homo sapiens OX=9606 GN=WDR91 PE=1 SV=2;tr|C9J1X0|C9J1X0_HUMAN WD repeat-containing protein 91 OS=Homo sapiens OX=9606 GN=WDR91 PE=1 SV=1;sp|A4D1P6-2|WDR91_HUMAN Isoform 2 of WD repeat-containing pro	4	5	5	5	0	0	0	0	0	0	0	0	0	0	5	0	0	0	0	0	0	0	0	0	0	0	5	0	0	0	0	0	0	0	0	0	0	0	5	0	9.1
597	A4FU01;A4FU01-3;A4FU01-2;A4FU01-5;A4FU01-6;A4FU01-4	A4FU01;A4FU01-3;A4FU01-2;A4FU01-5;A4FU01-6;A4FU01-4	1;1;1;1;1;1	1;1;1;1;1;1	1;1;1;1;1;1	Myotubularin-related protein 11	MTMR11	sp|A4FU01|MTMRB_HUMAN Myotubularin-related protein 11 OS=Homo sapiens OX=9606 GN=MTMR11 PE=2 SV=2;sp|A4FU01-3|MTMRB_HUMAN Isoform 3 of Myotubularin-related protein 11 OS=Homo sapiens OX=9606 GN=MTMR11;sp|A4FU01-2|MTMRB_HUMAN Isoform 2 of Myotubularin-relat	6	1	1	1	1	0	0	0	1	0	0	0	0	0	0	0	1	0	0	0	1	0	0	0	0	0	0	0	1	0	0	0	1	0	0	0	0	0	0	0	2.3
598	Q9UNL4;Q9UNL4-2;Q9UNL4-4;Q9UNL4-5;Q9UNL4-8;E9PJ14;A4KYM5;Q9UNL4-7;Q9UNL4-6	Q9UNL4;Q9UNL4-2;Q9UNL4-4;Q9UNL4-5;Q9UNL4-8;E9PJ14;A4KYM5;Q9UNL4-7;Q9UNL4-6	1;1;1;1;1;1;1;1;1	1;1;1;1;1;1;1;1;1	1;1;1;1;1;1;1;1;1	Inhibitor of growth protein 4	ING4	sp|Q9UNL4|ING4_HUMAN Inhibitor of growth protein 4 OS=Homo sapiens OX=9606 GN=ING4 PE=1 SV=1;sp|Q9UNL4-2|ING4_HUMAN Isoform 2 of Inhibitor of growth protein 4 OS=Homo sapiens OX=9606 GN=ING4;sp|Q9UNL4-4|ING4_HUMAN Isoform 4 of Inhibitor of growth protein 4	9	1	1	1	0	0	1	0	0	0	0	0	0	0	0	0	0	0	1	0	0	0	0	0	0	0	0	0	0	0	1	0	0	0	0	0	0	0	0	0	8.8
599	A5D8W1;A5D8W1-2;A5D8W1-5	A5D8W1;A5D8W1-2;A5D8W1-5	1;1;1	1;1;1	1;1;1	Cilia- and flagella-associated protein 69	CFAP69	sp|A5D8W1|CFA69_HUMAN Cilia- and flagella-associated protein 69 OS=Homo sapiens OX=9606 GN=CFAP69 PE=1 SV=3;sp|A5D8W1-2|CFA69_HUMAN Isoform 2 of Cilia- and flagella-associated protein 69 OS=Homo sapiens OX=9606 GN=CFAP69;sp|A5D8W1-5|CFA69_HUMAN Isoform 5 o	3	1	1	1	1	0	0	0	0	0	0	0	0	1	0	0	1	0	0	0	0	0	0	0	0	1	0	0	1	0	0	0	0	0	0	0	0	1	0	0	1.3
600	A5PLL7;Q5TGE2;A5PLL7-2	A5PLL7;Q5TGE2;A5PLL7-2	1;1;1	1;1;1	1;1;1	Transmembrane protein 189	TMEM189	sp|A5PLL7|TM189_HUMAN Plasmanylethanolamine desaturase OS=Homo sapiens OX=9606 GN=TMEM189 PE=1 SV=3;tr|Q5TGE2|Q5TGE2_HUMAN HCG2044780, isoform CRA_b OS=Homo sapiens OX=9606 GN=TMEM189 PE=1 SV=1;sp|A5PLL7-2|TM189_HUMAN Isoform 2 of Plasmanylethanolamine des	3	1	1	1	0	0	1	0	0	0	0	0	0	0	0	0	0	0	1	0	0	0	0	0	0	0	0	0	0	0	1	0	0	0	0	0	0	0	0	0	5.6
601	A5YKK6;A5YKK6-2;A5YKK6-3;A5YKK6-4;H3BVC9;H3BNB1;H3BR89;H3BTH2;H3BMH0;H3BT18;H3BU44;H3BPF1	A5YKK6;A5YKK6-2;A5YKK6-3;A5YKK6-4	112;109;96;69;13;9;7;6;6;2;2;1	112;109;96;69;13;9;7;6;6;2;2;1	94;91;78;69;13;9;7;6;6;2;2;1	CCR4-NOT transcription complex subunit 1	CNOT1	sp|A5YKK6|CNOT1_HUMAN CCR4-NOT transcription complex subunit 1 OS=Homo sapiens OX=9606 GN=CNOT1 PE=1 SV=2;sp|A5YKK6-2|CNOT1_HUMAN Isoform 2 of CCR4-NOT transcription complex subunit 1 OS=Homo sapiens OX=9606 GN=CNOT1;sp|A5YKK6-3|CNOT1_HUMAN Isoform 3 of CC	12	112	112	94	68	6	40	4	79	8	82	11	56	16	99	18	68	6	40	4	79	8	82	11	56	16	99	18	54	3	34	2	64	4	70	8	46	11	83	12	61.8
602	A6NCS6	A6NCS6	4	4	4	Uncharacterized protein C2orf72	C2orf72	sp|A6NCS6|CB072_HUMAN Uncharacterized protein C2orf72 OS=Homo sapiens OX=9606 GN=C2orf72 PE=1 SV=2	1	4	4	4	0	0	4	0	0	0	0	0	0	0	0	0	0	0	4	0	0	0	0	0	0	0	0	0	0	0	4	0	0	0	0	0	0	0	0	0	20
603	A6ND36;A6ND36-2;K7EKG0	A6ND36;A6ND36-2	10;5;2	10;5;2	10;5;2	Protein FAM83G	FAM83G	sp|A6ND36|FA83G_HUMAN Protein FAM83G OS=Homo sapiens OX=9606 GN=FAM83G PE=1 SV=2;sp|A6ND36-2|FA83G_HUMAN Isoform 2 of Protein FAM83G OS=Homo sapiens OX=9606 GN=FAM83G	3	10	10	10	0	0	0	0	0	0	0	0	7	1	6	3	0	0	0	0	0	0	0	0	7	1	6	3	0	0	0	0	0	0	0	0	7	1	6	3	19.1
604	A6NDG6;H3BV17	A6NDG6;H3BV17	2;1	2;1	2;1	Phosphoglycolate phosphatase	PGP	sp|A6NDG6|PGP_HUMAN Glycerol-3-phosphate phosphatase OS=Homo sapiens OX=9606 GN=PGP PE=1 SV=1;tr|H3BV17|H3BV17_HUMAN Glycerol-3-phosphate phosphatase (Fragment) OS=Homo sapiens OX=9606 GN=PGP PE=1 SV=1	2	2	2	2	0	0	0	0	1	0	0	0	0	0	2	0	0	0	0	0	1	0	0	0	0	0	2	0	0	0	0	0	1	0	0	0	0	0	2	0	8.1
605	P51610-4;A6NEM2;P51610;P51610-2;P51610-3;H7C1C4	P51610-4;A6NEM2;P51610;P51610-2;P51610-3	17;17;16;15;9;1	17;17;16;15;9;1	16;16;15;14;9;0	Host cell factor 1;HCF N-terminal chain 1;HCF N-terminal chain 2;HCF N-terminal chain 3;HCF N-terminal chain 4;HCF N-terminal chain 5;HCF N-terminal chain 6;HCF C-terminal chain 1;HCF C-terminal chain 2;HCF C-terminal chain 3;HCF C-terminal chain 4;HCF C-terminal chain 5;HCF C-terminal chain 6	HCFC1	sp|P51610-4|HCFC1_HUMAN Isoform 4 of Host cell factor 1 OS=Homo sapiens OX=9606 GN=HCFC1;tr|A6NEM2|A6NEM2_HUMAN Host cell factor 1 OS=Homo sapiens OX=9606 GN=HCFC1 PE=1 SV=2;sp|P51610|HCFC1_HUMAN Host cell factor 1 OS=Homo sapiens OX=9606 GN=HCFC1 PE=1 SV=	6	17	17	16	1	9	0	7	1	9	1	3	2	5	0	6	1	9	0	7	1	9	1	3	2	5	0	6	1	8	0	7	1	9	1	3	2	5	0	6	11.9
606	O75665;A6NF31;O75665-3	O75665;A6NF31;O75665-3	2;2;2	2;2;2	2;2;2	Oral-facial-digital syndrome 1 protein	OFD1	sp|O75665|OFD1_HUMAN Oral-facial-digital syndrome 1 protein OS=Homo sapiens OX=9606 GN=OFD1 PE=1 SV=1;tr|A6NF31|A6NF31_HUMAN Oral-facial-digital syndrome 1 protein OS=Homo sapiens OX=9606 GN=OFD1 PE=1 SV=1;sp|O75665-3|OFD1_HUMAN Isoform 3 of Oral-facial-di	3	2	2	2	0	0	2	0	0	0	0	0	0	0	0	0	0	0	2	0	0	0	0	0	0	0	0	0	0	0	2	0	0	0	0	0	0	0	0	0	2.7
607	A6NFI3	A6NFI3	27	27	27	Zinc finger protein 316	ZNF316	sp|A6NFI3|ZN316_HUMAN Zinc finger protein 316 OS=Homo sapiens OX=9606 GN=ZNF316 PE=1 SV=1	1	27	27	27	0	13	0	4	0	9	0	21	0	7	0	18	0	13	0	4	0	9	0	21	0	7	0	18	0	13	0	4	0	9	0	21	0	7	0	18	46.3
608	Q969T9;K7EIN1;K7ESN4;K7EIJ0;K7EIK1;K7ENL2;A6NG10;K7EMC9	Q969T9;K7EIN1;K7ESN4;K7EIJ0;K7EIK1;K7ENL2;A6NG10;K7EMC9	1;1;1;1;1;1;1;1	1;1;1;1;1;1;1;1	1;1;1;1;1;1;1;1	WW domain-binding protein 2	WBP2	sp|Q969T9|WBP2_HUMAN WW domain-binding protein 2 OS=Homo sapiens OX=9606 GN=WBP2 PE=1 SV=1;tr|K7EIN1|K7EIN1_HUMAN WW domain-binding protein 2 (Fragment) OS=Homo sapiens OX=9606 GN=WBP2 PE=1 SV=1;tr|K7ESN4|K7ESN4_HUMAN WW domain-binding protein 2 (Fragment)	8	1	1	1	0	0	0	0	1	0	0	0	0	0	0	0	0	0	0	0	1	0	0	0	0	0	0	0	0	0	0	0	1	0	0	0	0	0	0	0	3.8
609	O95070;A6NGW1;E9PIZ0;C9JST7;E9PS11	O95070;A6NGW1;E9PIZ0;C9JST7	4;4;3;3;1	4;4;3;3;1	4;4;3;3;1	Protein YIF1A	YIF1A	sp|O95070|YIF1A_HUMAN Protein YIF1A OS=Homo sapiens OX=9606 GN=YIF1A PE=1 SV=2;tr|A6NGW1|A6NGW1_HUMAN Protein YIF1A OS=Homo sapiens OX=9606 GN=YIF1A PE=1 SV=1;tr|E9PIZ0|E9PIZ0_HUMAN Protein YIF1A (Fragment) OS=Homo sapiens OX=9606 GN=YIF1A PE=1 SV=1;tr|C9J	5	4	4	4	0	0	3	1	2	1	0	0	2	0	0	0	0	0	3	1	2	1	0	0	2	0	0	0	0	0	3	1	2	1	0	0	2	0	0	0	35.5
610	Q13114;A6NHG8;Q13114-2;H0YL26;H0YMI8;H0YL25	Q13114;A6NHG8;Q13114-2;H0YL26	8;8;7;4;1;1	8;8;7;4;1;1	8;8;7;4;1;1	TNF receptor-associated factor 3	TRAF3	sp|Q13114|TRAF3_HUMAN TNF receptor-associated factor 3 OS=Homo sapiens OX=9606 GN=TRAF3 PE=1 SV=2;tr|A6NHG8|A6NHG8_HUMAN TNF receptor-associated factor OS=Homo sapiens OX=9606 GN=TRAF3 PE=1 SV=1;sp|Q13114-2|TRAF3_HUMAN Isoform 2 of TNF receptor-associated	6	8	8	8	0	0	0	0	0	0	8	0	0	0	0	0	0	0	0	0	0	0	8	0	0	0	0	0	0	0	0	0	0	0	8	0	0	0	0	0	17.1
611	A6NHL2;A6NHL2-2	A6NHL2;A6NHL2-2	6;6	1;1	1;1	Tubulin alpha chain-like 3	TUBAL3	sp|A6NHL2|TBAL3_HUMAN Tubulin alpha chain-like 3 OS=Homo sapiens OX=9606 GN=TUBAL3 PE=1 SV=2;sp|A6NHL2-2|TBAL3_HUMAN Isoform 2 of Tubulin alpha chain-like 3 OS=Homo sapiens OX=9606 GN=TUBAL3	2	6	1	1	4	4	6	4	4	4	4	3	5	2	4	2	1	1	1	1	1	1	1	0	1	0	1	0	1	1	1	1	1	1	1	0	1	0	1	0	10.5
612	A6NHQ2	A6NHQ2	4	2	2	rRNA/tRNA 2-O-methyltransferase fibrillarin-like protein 1	FBLL1	sp|A6NHQ2|FBLL1_HUMAN rRNA/tRNA 2-O-methyltransferase fibrillarin-like protein 1 OS=Homo sapiens OX=9606 GN=FBLL1 PE=3 SV=2	1	4	2	2	1	4	2	4	2	4	0	1	2	2	0	2	0	2	0	2	1	2	0	0	1	1	0	1	0	2	0	2	1	2	0	0	1	1	0	1	11.4
613	A6NHQ4	A6NHQ4	2	2	2	Uncharacterized protein C17orf96	C17orf96	sp|A6NHQ4|EPOP_HUMAN Elongin BC and Polycomb repressive complex 2-associated protein OS=Homo sapiens OX=9606 GN=EPOP PE=1 SV=1	1	2	2	2	0	0	0	0	0	1	0	0	1	0	0	0	0	0	0	0	0	1	0	0	1	0	0	0	0	0	0	0	0	1	0	0	1	0	0	0	7.4
614	A6NHR9;A6NHR9-2;J3KTL8;A6NHR9-3;A0A2R8YCU7;J3QSH1;A0A2R8YE92;J3KRK8	A6NHR9;A6NHR9-2;J3KTL8	45;44;30;18;6;3;3;2	45;44;30;18;6;3;3;2	45;44;30;18;6;3;3;2	Structural maintenance of chromosomes flexible hinge domain-containing protein 1	SMCHD1	sp|A6NHR9|SMHD1_HUMAN Structural maintenance of chromosomes flexible hinge domain-containing protein 1 OS=Homo sapiens OX=9606 GN=SMCHD1 PE=1 SV=2;sp|A6NHR9-2|SMHD1_HUMAN Isoform 2 of Structural maintenance of chromosomes flexible hinge domain-containing p	8	45	45	45	0	33	0	30	0	36	0	5	0	14	0	5	0	33	0	30	0	36	0	5	0	14	0	5	0	33	0	30	0	36	0	5	0	14	0	5	29.5
615	A6NI28;H0YEJ7;E9PJK4	A6NI28;H0YEJ7;E9PJK4	3;3;3	3;3;3	3;3;3	Rho GTPase-activating protein 42	ARHGAP42	sp|A6NI28|RHG42_HUMAN Rho GTPase-activating protein 42 OS=Homo sapiens OX=9606 GN=ARHGAP42 PE=1 SV=3;tr|H0YEJ7|H0YEJ7_HUMAN Rho GTPase-activating protein 42 (Fragment) OS=Homo sapiens OX=9606 GN=ARHGAP42 PE=1 SV=1;tr|E9PJK4|E9PJK4_HUMAN Rho GTPase-activati	3	3	3	3	0	0	3	0	0	0	0	0	0	0	0	0	0	0	3	0	0	0	0	0	0	0	0	0	0	0	3	0	0	0	0	0	0	0	0	0	5.6
616	A6NJ78;P0C7V9;A0A0U1RR76;A6NJ78-2;A6NJ78-4;A0A0U1RRF2;B5MC64;A0A0U1RR64;A0A0U1RRD2;F8WD83;A6NJ78-3	A6NJ78	5;2;2;2;2;1;1;1;1;1;1	5;2;2;2;2;1;1;1;1;1;1	5;2;2;2;2;1;1;1;1;1;1	Probable methyltransferase-like protein 15	METTL15	sp|A6NJ78|MET15_HUMAN 12S rRNA N4-methylcytidine (m4C) methyltransferase OS=Homo sapiens OX=9606 GN=METTL15 PE=1 SV=1	11	5	5	5	0	0	4	0	0	0	0	0	0	1	0	1	0	0	4	0	0	0	0	0	0	1	0	1	0	0	4	0	0	0	0	0	0	1	0	1	20.4
617	P54578;A6NJA2;P54578-2;P54578-3	P54578;A6NJA2;P54578-2;P54578-3	1;1;1;1	1;1;1;1	1;1;1;1	Ubiquitin carboxyl-terminal hydrolase 14;Ubiquitin carboxyl-terminal hydrolase	USP14	sp|P54578|UBP14_HUMAN Ubiquitin carboxyl-terminal hydrolase 14 OS=Homo sapiens OX=9606 GN=USP14 PE=1 SV=3;tr|A6NJA2|A6NJA2_HUMAN Ubiquitin carboxyl-terminal hydrolase OS=Homo sapiens OX=9606 GN=USP14 PE=1 SV=2;sp|P54578-2|UBP14_HUMAN Isoform 2 of Ubiquitin	4	1	1	1	1	0	0	0	1	0	0	0	0	0	0	0	1	0	0	0	1	0	0	0	0	0	0	0	1	0	0	0	1	0	0	0	0	0	0	0	2.2
618	A6NJD9;A8MVT4;A8MYK1;H7C2P7	A6NJD9;A8MVT4;A8MYK1;H7C2P7	5;4;4;3	1;0;0;0	1;0;0;0		MRPL23	tr|A6NJD9|A6NJD9_HUMAN 39S ribosomal protein L23, mitochondrial OS=Homo sapiens OX=9606 GN=MRPL23 PE=1 SV=1;tr|A8MVT4|A8MVT4_HUMAN 39S ribosomal protein L23, mitochondrial OS=Homo sapiens OX=9606 GN=MRPL23 PE=1 SV=1;tr|A8MYK1|A8MYK1_HUMAN 39S ribosomal pro	4	5	1	1	2	1	4	0	1	1	1	0	3	1	0	0	0	1	0	0	0	1	0	0	0	0	0	0	0	1	0	0	0	1	0	0	0	0	0	0	34.4
619	Q96BP2;A6NJX6	Q96BP2;A6NJX6	1;1	1;1	1;1	Coiled-coil-helix-coiled-coil-helix domain-containing protein 1	CHCHD1	sp|Q96BP2|CHCH1_HUMAN Coiled-coil-helix-coiled-coil-helix domain-containing protein 1 OS=Homo sapiens OX=9606 GN=CHCHD1 PE=1 SV=1;tr|A6NJX6|A6NJX6_HUMAN Coiled-coil-helix-coiled-coil-helix domain-containing protein 1 OS=Homo sapiens OX=9606 GN=CHCHD1 PE=1	2	1	1	1	0	0	0	0	0	0	1	0	0	0	0	0	0	0	0	0	0	0	1	0	0	0	0	0	0	0	0	0	0	0	1	0	0	0	0	0	5.9
620	A6NKT7;J3KNE0;Q7Z3J3;Q7Z3J3-2	A6NKT7;J3KNE0;Q7Z3J3	54;54;49;8	3;3;3;1	1;1;1;0	RanBP2-like and GRIP domain-containing protein 3;RanBP2-like and GRIP domain-containing protein 4	RGPD3;RGPD4	sp|A6NKT7|RGPD3_HUMAN RanBP2-like and GRIP domain-containing protein 3 OS=Homo sapiens OX=9606 GN=RGPD3 PE=3 SV=2;tr|J3KNE0|J3KNE0_HUMAN RanBP2-like and GRIP domain-containing protein 3 OS=Homo sapiens OX=9606 GN=RGPD3 PE=1 SV=2;sp|Q7Z3J3|RGPD4_HUMAN RanBP	4	54	3	1	3	35	5	28	13	44	14	39	4	34	19	40	0	3	1	1	1	2	0	1	0	1	0	1	0	1	1	1	1	1	0	1	0	1	0	1	35.1
621	A6NL08	A6NL08	1	1	1	Olfactory receptor 6C75	OR6C75	sp|A6NL08|O6C75_HUMAN Olfactory receptor 6C75 OS=Homo sapiens OX=9606 GN=OR6C75 PE=3 SV=1	1	1	1	1	0	1	0	0	0	0	1	0	0	0	1	0	0	1	0	0	0	0	1	0	0	0	1	0	0	1	0	0	0	0	1	0	0	0	1	0	2.2
622	A6NLH6;Q9P003	A6NLH6;Q9P003	1;1	1;1	1;1	Protein cornichon homolog 4	CNIH4	tr|A6NLH6|A6NLH6_HUMAN Protein cornichon homolog 4 OS=Homo sapiens OX=9606 GN=CNIH4 PE=1 SV=1;sp|Q9P003|CNIH4_HUMAN Protein cornichon homolog 4 OS=Homo sapiens OX=9606 GN=CNIH4 PE=1 SV=1	2	1	1	1	0	0	1	0	1	0	0	0	1	0	0	0	0	0	1	0	1	0	0	0	1	0	0	0	0	0	1	0	1	0	0	0	1	0	0	0	14.6
623	A6NM28	A6NM28	5	5	5	Zinc finger protein 92 homolog	ZFP92	sp|A6NM28|ZFP92_HUMAN Zinc finger protein 92 homolog OS=Homo sapiens OX=9606 GN=ZFP92 PE=2 SV=3	1	5	5	5	0	4	0	2	0	3	0	0	0	0	0	0	0	4	0	2	0	3	0	0	0	0	0	0	0	4	0	2	0	3	0	0	0	0	0	0	14.9
624	Q96SF2;A6NM43	Q96SF2;A6NM43	1;1	1;1	1;1	T-complex protein 1 subunit theta-like 2;Putative T-complex protein 1 subunit theta-like 1	CCT8L2;CCT8L1P	sp|Q96SF2|TCPQM_HUMAN T-complex protein 1 subunit theta-like 2 OS=Homo sapiens OX=9606 GN=CCT8L2 PE=2 SV=2;sp|A6NM43|TCPQL_HUMAN Putative T-complex protein 1 subunit theta-like 1 OS=Homo sapiens OX=9606 GN=CCT8L1P PE=5 SV=1	2	1	1	1	0	1	0	0	0	0	0	0	0	0	0	0	0	1	0	0	0	0	0	0	0	0	0	0	0	1	0	0	0	0	0	0	0	0	0	0	1.8
625	A6NMB1	A6NMB1	1	1	1	Sialic acid-binding Ig-like lectin 16	SIGLEC16	sp|A6NMB1|SIG16_HUMAN Sialic acid-binding Ig-like lectin 16 OS=Homo sapiens OX=9606 GN=SIGLEC16 PE=2 SV=3	1	1	1	1	1	0	0	0	1	0	1	1	1	1	1	1	1	0	0	0	1	0	1	1	1	1	1	1	1	0	0	0	1	0	1	1	1	1	1	1	1.5
626	A6NMB9	A6NMB9	1	1	1	Putative fidgetin-like protein 2	FIGNL2	sp|A6NMB9|FIGL2_HUMAN Fidgetin-like protein 2 OS=Homo sapiens OX=9606 GN=FIGNL2 PE=2 SV=2	1	1	1	1	1	0	0	0	1	0	1	0	1	0	1	0	1	0	0	0	1	0	1	0	1	0	1	0	1	0	0	0	1	0	1	0	1	0	1	0	1.2
627	O75147;O75147-1;A6NN50;O75147-2;O75147-4;A8MSZ8	O75147;O75147-1;A6NN50;O75147-2;O75147-4;A8MSZ8	13;13;13;13;13;9	13;13;13;13;13;9	13;13;13;13;13;9	Obscurin-like protein 1	OBSL1	sp|O75147|OBSL1_HUMAN Obscurin-like protein 1 OS=Homo sapiens OX=9606 GN=OBSL1 PE=1 SV=4;sp|O75147-1|OBSL1_HUMAN Isoform 3 of Obscurin-like protein 1 OS=Homo sapiens OX=9606 GN=OBSL1;tr|A6NN50|A6NN50_HUMAN Obscurin-like protein 1 OS=Homo sapiens OX=9606 GN	6	13	13	13	0	0	0	0	0	0	0	1	5	0	8	0	0	0	0	0	0	0	0	1	5	0	8	0	0	0	0	0	0	0	0	1	5	0	8	0	9.8
628	Q12888;A6NNK5;Q12888-3;Q12888-2;M0R142;H7BZY0;H7C3N7	Q12888;A6NNK5;Q12888-3;Q12888-2	8;8;8;8;2;2;1	8;8;8;8;2;2;1	8;8;8;8;2;2;1	Tumor suppressor p53-binding protein 1	TP53BP1	sp|Q12888|TP53B_HUMAN TP53-binding protein 1 OS=Homo sapiens OX=9606 GN=TP53BP1 PE=1 SV=2;tr|A6NNK5|A6NNK5_HUMAN TP53-binding protein 1 OS=Homo sapiens OX=9606 GN=TP53BP1 PE=1 SV=2;sp|Q12888-3|TP53B_HUMAN Isoform 3 of TP53-binding protein 1 OS=Homo sapiens	7	8	8	8	0	2	0	6	0	1	0	0	0	2	0	0	0	2	0	6	0	1	0	0	0	2	0	0	0	2	0	6	0	1	0	0	0	2	0	0	6.4
629	P51843;A6NNU8;P51843-2	P51843;A6NNU8;P51843-2	1;1;1	1;1;1	1;1;1	Nuclear receptor subfamily 0 group B member 1	NR0B1	sp|P51843|NR0B1_HUMAN Nuclear receptor subfamily 0 group B member 1 OS=Homo sapiens OX=9606 GN=NR0B1 PE=1 SV=2;tr|A6NNU8|A6NNU8_HUMAN Nuclear receptor subfamily 0 group B member 1 OS=Homo sapiens OX=9606 GN=NR0B1 PE=1 SV=1;sp|P51843-2|NR0B1_HUMAN Isoform 2	3	1	1	1	0	0	1	0	0	0	0	0	1	0	0	0	0	0	1	0	0	0	0	0	1	0	0	0	0	0	1	0	0	0	0	0	1	0	0	0	3.4
630	Q99755;Q99755-2;Q99755-4;A6PW57;Q99755-3;A2A3N6	Q99755;Q99755-2;Q99755-4;A6PW57;Q99755-3;A2A3N6	2;2;2;2;2;1	2;2;2;2;2;1	2;2;2;2;2;1	Phosphatidylinositol 4-phosphate 5-kinase type-1 alpha;Putative PIP5K1A and PSMD4-like protein	PIP5K1A;PIPSL	sp|Q99755|PI51A_HUMAN Phosphatidylinositol 4-phosphate 5-kinase type-1 alpha OS=Homo sapiens OX=9606 GN=PIP5K1A PE=1 SV=1;sp|Q99755-2|PI51A_HUMAN Isoform 2 of Phosphatidylinositol 4-phosphate 5-kinase type-1 alpha OS=Homo sapiens OX=9606 GN=PIP5K1A;sp|Q997	6	2	2	2	0	0	1	0	0	0	0	0	0	1	0	0	0	0	1	0	0	0	0	0	0	1	0	0	0	0	1	0	0	0	0	0	0	1	0	0	6
631	A6ZKI3;Q17RB0	A6ZKI3;Q17RB0	3;2	3;2	2;1	Protein FAM127A;Protein FAM127C	FAM127A;FAM127C	sp|A6ZKI3|RTL8C_HUMAN Retrotransposon Gag-like protein 8C OS=Homo sapiens OX=9606 GN=RTL8C PE=1 SV=1;sp|Q17RB0|RTL8B_HUMAN Retrotransposon Gag-like protein 8B OS=Homo sapiens OX=9606 GN=RTL8B PE=1 SV=1	2	3	3	2	1	0	3	0	0	0	0	0	2	0	0	0	1	0	3	0	0	0	0	0	2	0	0	0	1	0	2	0	0	0	0	0	1	0	0	0	29.2
632	A7KAX9;A7KAX9-2;G3V174;A7KAX9-3	A7KAX9;A7KAX9-2	8;8;3;1	8;8;3;1	8;8;3;1	Rho GTPase-activating protein 32	ARHGAP32	sp|A7KAX9|RHG32_HUMAN Rho GTPase-activating protein 32 OS=Homo sapiens OX=9606 GN=ARHGAP32 PE=1 SV=1;sp|A7KAX9-2|RHG32_HUMAN Isoform 2 of Rho GTPase-activating protein 32 OS=Homo sapiens OX=9606 GN=ARHGAP32	4	8	8	8	1	0	0	0	0	0	3	0	0	0	2	2	1	0	0	0	0	0	3	0	0	0	2	2	1	0	0	0	0	0	3	0	0	0	2	2	4.6
633	A7MCY6;J3KS71;F5H1U4;A7MCY6-2	A7MCY6	5;1;1;1	5;1;1;1	5;1;1;1	TANK-binding kinase 1-binding protein 1	TBKBP1	sp|A7MCY6|TBKB1_HUMAN TANK-binding kinase 1-binding protein 1 OS=Homo sapiens OX=9606 GN=TBKBP1 PE=1 SV=1	4	5	5	5	0	0	0	0	1	0	4	0	0	0	1	0	0	0	0	0	1	0	4	0	0	0	1	0	0	0	0	0	1	0	4	0	0	0	1	0	12.8
634	A8CG34;A8CG34-2;A6NF01;Q6PJE2;C9JFL1;C9JER0;C9J370;A0A0J9YWR1;Q6PJE2-5	A8CG34;A8CG34-2	23;16;6;4;4;4;4;4;4	23;16;6;4;4;4;4;4;4	8;4;1;0;1;0;0;0;0	Nuclear envelope pore membrane protein POM 121C	POM121C	sp|A8CG34|P121C_HUMAN Nuclear envelope pore membrane protein POM 121C OS=Homo sapiens OX=9606 GN=POM121C PE=1 SV=3;sp|A8CG34-2|P121C_HUMAN Isoform 2 of Nuclear envelope pore membrane protein POM 121C OS=Homo sapiens OX=9606 GN=POM121C	9	23	23	8	0	15	0	10	0	16	0	11	0	5	0	13	0	15	0	10	0	16	0	11	0	5	0	13	0	5	0	5	0	6	0	3	0	1	0	4	28.6
635	A8MQ02;H0Y8L4;H0YA98;H0Y9I0	A8MQ02	80;13;7;4	1;0;0;0	0;0;0;0		MLLT4	tr|A8MQ02|A8MQ02_HUMAN Afadin OS=Homo sapiens OX=9606 GN=AFDN PE=1 SV=2	4	80	1	0	11	8	13	4	35	9	47	9	46	21	73	12	0	0	0	0	1	0	1	0	1	1	1	0	0	0	0	0	0	0	0	0	0	0	0	0	66.4
636	A8MTY0	A8MTY0	3	1	1	Putative zinc finger protein 724	ZNF724P	sp|A8MTY0|ZN724_HUMAN Zinc finger protein 724 OS=Homo sapiens OX=9606 GN=ZNF724 PE=2 SV=3	1	3	1	1	0	1	0	0	0	0	0	1	0	0	0	1	0	1	0	0	0	0	0	0	0	0	0	0	0	1	0	0	0	0	0	0	0	0	0	0	8.7
637	Q9BVK8;A8MU21;Q9BVK8-2	Q9BVK8;A8MU21;Q9BVK8-2	2;2;2	2;2;2	2;2;2	Transmembrane protein 147	TMEM147	sp|Q9BVK8|TM147_HUMAN Transmembrane protein 147 OS=Homo sapiens OX=9606 GN=TMEM147 PE=1 SV=1;tr|A8MU21|A8MU21_HUMAN Transmembrane protein 147 OS=Homo sapiens OX=9606 GN=TMEM147 PE=1 SV=1;sp|Q9BVK8-2|TM147_HUMAN Isoform 2 of Transmembrane protein 147 OS=Hom	3	2	2	2	0	0	2	0	0	0	0	0	0	0	0	0	0	0	2	0	0	0	0	0	0	0	0	0	0	0	2	0	0	0	0	0	0	0	0	0	11.6
638	P10276;P13631;P13631-2;A8MUP8;P10276-3;P13631-3;P13631-4;P10276-2	P10276;P13631;P13631-2;A8MUP8;P10276-3;P13631-3;P13631-4;P10276-2	1;1;1;1;1;1;1;1	1;1;1;1;1;1;1;1	1;1;1;1;1;1;1;1	Retinoic acid receptor alpha;Retinoic acid receptor gamma	RARA;RARG	sp|P10276|RARA_HUMAN Retinoic acid receptor alpha OS=Homo sapiens OX=9606 GN=RARA PE=1 SV=2;sp|P13631|RARG_HUMAN Retinoic acid receptor gamma OS=Homo sapiens OX=9606 GN=RARG PE=1 SV=1;sp|P13631-2|RARG_HUMAN Isoform 2 of Retinoic acid receptor gamma OS=Homo	8	1	1	1	0	1	0	0	0	0	0	0	0	0	0	0	0	1	0	0	0	0	0	0	0	0	0	0	0	1	0	0	0	0	0	0	0	0	0	0	1.9
639	P62750;H7BY10;K7EJV9;K7ERT8;A8MUS3;K7EMA7	P62750;H7BY10;K7EJV9;K7ERT8;A8MUS3;K7EMA7	11;11;11;11;11;7	11;11;11;11;11;7	11;11;11;11;11;7	60S ribosomal protein L23a	RPL23A	sp|P62750|RL23A_HUMAN 60S ribosomal protein L23a OS=Homo sapiens OX=9606 GN=RPL23A PE=1 SV=1;tr|H7BY10|H7BY10_HUMAN 60S ribosomal protein L23a (Fragment) OS=Homo sapiens OX=9606 GN=RPL23A PE=1 SV=1;tr|K7EJV9|K7EJV9_HUMAN 60S ribosomal protein L23a (Fragmen	6	11	11	11	8	3	11	0	9	0	5	0	5	1	3	0	8	3	11	0	9	0	5	0	5	1	3	0	8	3	11	0	9	0	5	0	5	1	3	0	44.2
640	A8MVW0	A8MVW0	3	3	2	Protein FAM171A2	FAM171A2	sp|A8MVW0|F1712_HUMAN Protein FAM171A2 OS=Homo sapiens OX=9606 GN=FAM171A2 PE=1 SV=1	1	3	3	2	0	0	0	0	0	0	0	0	0	0	3	0	0	0	0	0	0	0	0	0	0	0	3	0	0	0	0	0	0	0	0	0	0	0	2	0	4.2
641	P07148;A8MW49	P07148;A8MW49	4;4	4;4	4;4	Fatty acid-binding protein, liver	FABP1	sp|P07148|FABPL_HUMAN Fatty acid-binding protein, liver OS=Homo sapiens OX=9606 GN=FABP1 PE=1 SV=1;tr|A8MW49|A8MW49_HUMAN Fatty acid-binding protein 1 OS=Homo sapiens OX=9606 GN=FABP1 PE=1 SV=1	2	4	4	4	4	0	0	0	2	0	0	0	0	0	0	0	4	0	0	0	2	0	0	0	0	0	0	0	4	0	0	0	2	0	0	0	0	0	0	0	33.9
642	P62308;A8MWD9;Q49AN9;F5H013;C9JVQ0	P62308;A8MWD9;Q49AN9;F5H013	3;3;3;3;1	3;3;3;3;1	3;3;3;3;1	Small nuclear ribonucleoprotein G;Putative small nuclear ribonucleoprotein G-like protein 15	SNRPG;SNRPGP15	sp|P62308|RUXG_HUMAN Small nuclear ribonucleoprotein G OS=Homo sapiens OX=9606 GN=SNRPG PE=1 SV=1;sp|A8MWD9|RUXGL_HUMAN Putative small nuclear ribonucleoprotein G-like protein 15 OS=Homo sapiens OX=9606 GN=SNRPGP15 PE=5 SV=2;tr|Q49AN9|Q49AN9_HUMAN Small nu	5	3	3	3	0	2	0	0	0	0	0	0	1	1	0	1	0	2	0	0	0	0	0	0	1	1	0	1	0	2	0	0	0	0	0	0	1	1	0	1	26.3
643	P18074;A8MX75;E7EVE9;P18074-2;K7EKF3;K7EIT8;K7ENL1;B4E0F6	P18074;A8MX75;E7EVE9;P18074-2	6;6;5;3;2;2;1;1	6;6;5;3;2;2;1;1	6;6;5;3;2;2;1;1	TFIIH basal transcription factor complex helicase XPD subunit	ERCC2	sp|P18074|ERCC2_HUMAN General transcription and DNA repair factor IIH helicase subunit XPD OS=Homo sapiens OX=9606 GN=ERCC2 PE=1 SV=1;tr|A8MX75|A8MX75_HUMAN General transcription and DNA repair factor IIH helicase subunit XPD (Fragment) OS=Homo sapiens OX=	8	6	6	6	0	2	0	3	0	3	0	0	0	2	0	1	0	2	0	3	0	3	0	0	0	2	0	1	0	2	0	3	0	3	0	0	0	2	0	1	12
644	A8MXP9;Q68E03	A8MXP9	58;8	1;1	1;1		MATR3	tr|A8MXP9|A8MXP9_HUMAN Matrin-3 OS=Homo sapiens OX=9606 GN=MATR3 PE=1 SV=1	2	58	1	1	3	45	5	41	10	46	3	47	8	47	8	47	0	1	0	0	0	0	0	0	0	0	0	0	0	1	0	0	0	0	0	0	0	0	0	0	67.2
645	A8MYB1	A8MYB1	1	1	1	Transmembrane and coiled-coil domain-containing protein 5B	TMCO5B	sp|A8MYB1|TMC5B_HUMAN Transmembrane and coiled-coil domain-containing protein 5B OS=Homo sapiens OX=9606 GN=TMCO5B PE=3 SV=1	1	1	1	1	0	0	1	0	0	0	0	0	0	0	0	0	0	0	1	0	0	0	0	0	0	0	0	0	0	0	1	0	0	0	0	0	0	0	0	0	4.2
646	P55039;A8MZF9;J3QRI9;J3QKW7;J3KRL5;J3QR71;J3QL90;J3QKV7	P55039;A8MZF9	7;7;3;3;2;2;1;1	7;7;3;3;2;2;1;1	7;7;3;3;2;2;1;1	Developmentally-regulated GTP-binding protein 2	DRG2	sp|P55039|DRG2_HUMAN Developmentally-regulated GTP-binding protein 2 OS=Homo sapiens OX=9606 GN=DRG2 PE=1 SV=1;tr|A8MZF9|A8MZF9_HUMAN Developmentally-regulated GTP-binding protein 2 OS=Homo sapiens OX=9606 GN=DRG2 PE=1 SV=1	8	7	7	7	0	0	7	0	0	0	0	0	0	0	0	0	0	0	7	0	0	0	0	0	0	0	0	0	0	0	7	0	0	0	0	0	0	0	0	0	25.8
647	Q8IYB3;A9Z1X7;Q8IYB3-2;E9PCT1;M0R088;M0QXG5;M0R1E7	Q8IYB3;A9Z1X7;Q8IYB3-2;E9PCT1;M0R088	11;11;11;8;6;3;2	11;11;11;8;6;3;2	11;11;11;8;6;3;2	Serine/arginine repetitive matrix protein 1	SRRM1	sp|Q8IYB3|SRRM1_HUMAN Serine/arginine repetitive matrix protein 1 OS=Homo sapiens OX=9606 GN=SRRM1 PE=1 SV=2;tr|A9Z1X7|A9Z1X7_HUMAN Serine/arginine repetitive matrix protein 1 OS=Homo sapiens OX=9606 GN=SRRM1 PE=1 SV=1;sp|Q8IYB3-2|SRRM1_HUMAN Isoform 2 of	7	11	11	11	2	0	10	0	3	0	4	0	6	0	1	0	2	0	10	0	3	0	4	0	6	0	1	0	2	0	10	0	3	0	4	0	6	0	1	0	19.2
648	Q9Y262;B0QY89;Q9Y262-2;B0QY90;C9JHP4;C9K0Q7;H7C3A0;H0Y7E6	Q9Y262;B0QY89;Q9Y262-2;B0QY90	23;23;22;18;6;6;3;2	23;23;22;18;6;6;3;2	23;23;22;18;6;6;3;2	Eukaryotic translation initiation factor 3 subunit L	EIF3L	sp|Q9Y262|EIF3L_HUMAN Eukaryotic translation initiation factor 3 subunit L OS=Homo sapiens OX=9606 GN=EIF3L PE=1 SV=1;tr|B0QY89|B0QY89_HUMAN Eukaryotic translation initiation factor 3 subunit L OS=Homo sapiens OX=9606 GN=EIF3L PE=1 SV=1;sp|Q9Y262-2|EIF3L_H	8	23	23	23	5	0	19	0	7	0	0	0	5	0	7	0	5	0	19	0	7	0	0	0	5	0	7	0	5	0	19	0	7	0	0	0	5	0	7	0	53.9
649	Q9UH17;B0QYD3;Q9UH17-3;Q9UH17-2;P31941;P31941-2;Q96AK3;Q6ICH2	Q9UH17;B0QYD3;Q9UH17-3;Q9UH17-2	8;8;6;4;3;3;2;2	8;8;6;4;3;3;2;2	8;8;6;4;3;3;2;2	DNA dC->dU-editing enzyme APOBEC-3B	APOBEC3B	sp|Q9UH17|ABC3B_HUMAN DNA dC->dU-editing enzyme APOBEC-3B OS=Homo sapiens OX=9606 GN=APOBEC3B PE=1 SV=1;tr|B0QYD3|B0QYD3_HUMAN DNA dC->dU-editing enzyme APOBEC-3B OS=Homo sapiens OX=9606 GN=APOBEC3B PE=1 SV=1;sp|Q9UH17-3|ABC3B_HUMAN Isoform 3 of DNA dC->dU	8	8	8	8	0	4	3	7	0	4	0	0	0	0	0	0	0	4	3	7	0	4	0	0	0	0	0	0	0	4	3	7	0	4	0	0	0	0	0	0	28.5
650	Q99829;B0QZ18;F2Z2V0;A6PVH9;E7ENH5;Q5JX45;Q5JX44;Q5JX52;Q5JX60;Q5JX61;Q5JX59;H0Y524;Q5JX58;Q5JX56;E7EV27;Q5JX55;Q5JX54	Q99829;B0QZ18;F2Z2V0;A6PVH9;E7ENH5;Q5JX45;Q5JX44;Q5JX52;Q5JX60;Q5JX61;Q5JX59;H0Y524;Q5JX58;Q5JX56	4;4;4;3;3;3;2;2;2;2;2;2;2;2;1;1;1	4;4;4;3;3;3;2;2;2;2;2;2;2;2;1;1;1	3;3;3;2;2;2;1;1;1;1;1;2;1;1;0;0;0	Copine-1	CPNE1	sp|Q99829|CPNE1_HUMAN Copine-1 OS=Homo sapiens OX=9606 GN=CPNE1 PE=1 SV=1;tr|B0QZ18|B0QZ18_HUMAN Copine-1 OS=Homo sapiens OX=9606 GN=CPNE1 PE=1 SV=1;tr|F2Z2V0|F2Z2V0_HUMAN Copine-1 (Fragment) OS=Homo sapiens OX=9606 GN=CPNE1 PE=1 SV=1;tr|A6PVH9|A6PVH9_HUMA	17	4	4	3	0	0	3	0	0	0	0	0	3	0	0	0	0	0	3	0	0	0	0	0	3	0	0	0	0	0	3	0	0	0	0	0	2	0	0	0	8
651	Q15326;B0QZE2;B7Z2J6;Q15326-4;Q15326-2;Q15326-6;Q15326-3;A0A0A0MRY2;E7ENI9;J3QKD2;Q15326-5;E9PE09;E7EV75	Q15326;B0QZE2;B7Z2J6;Q15326-4;Q15326-2;Q15326-6;Q15326-3;A0A0A0MRY2;E7ENI9;J3QKD2;Q15326-5	11;11;11;11;11;11;11;10;10;10;10;2;2	11;11;11;11;11;11;11;10;10;10;10;2;2	11;11;11;11;11;11;11;10;10;10;10;2;2	Zinc finger MYND domain-containing protein 11	ZMYND11	sp|Q15326|ZMY11_HUMAN Zinc finger MYND domain-containing protein 11 OS=Homo sapiens OX=9606 GN=ZMYND11 PE=1 SV=2;tr|B0QZE2|B0QZE2_HUMAN Zinc finger MYND domain-containing protein 11 OS=Homo sapiens OX=9606 GN=ZMYND11 PE=1 SV=1;tr|B7Z2J6|B7Z2J6_HUMAN Zinc f	13	11	11	11	0	9	0	5	0	9	0	7	0	5	0	6	0	9	0	5	0	9	0	7	0	5	0	6	0	9	0	5	0	9	0	7	0	5	0	6	23.8
652	P02656;B0YIW2	P02656;B0YIW2	1;1	1;1	1;1	Apolipoprotein C-III	APOC3	sp|P02656|APOC3_HUMAN Apolipoprotein C-III OS=Homo sapiens OX=9606 GN=APOC3 PE=1 SV=1;tr|B0YIW2|B0YIW2_HUMAN Apolipoprotein C-III OS=Homo sapiens OX=9606 GN=APOC3 PE=1 SV=1	2	1	1	1	0	0	0	0	1	1	0	0	0	0	1	1	0	0	0	0	1	1	0	0	0	0	1	1	0	0	0	0	1	1	0	0	0	0	1	1	16.2
653	P23142-4;B1AHL2	P23142-4;B1AHL2	2;2	1;1	1;1	Fibulin-1	FBLN1	sp|P23142-4|FBLN1_HUMAN Isoform C of Fibulin-1 OS=Homo sapiens OX=9606 GN=FBLN1;tr|B1AHL2|B1AHL2_HUMAN Fibulin-1 OS=Homo sapiens OX=9606 GN=FBLN1 PE=1 SV=1	2	2	1	1	0	0	0	0	0	0	2	0	1	0	1	0	0	0	0	0	0	0	1	0	1	0	0	0	0	0	0	0	0	0	1	0	1	0	0	0	5.4
654	B1AKI6;Q9NUK0;Q9NUK0-4;Q9NUK0-2;B1AKI2;B1AKI5;B1AKI4;Q9NUK0-5;Q9NUK0-3	B1AKI6;Q9NUK0;Q9NUK0-4;Q9NUK0-2	5;4;3;3;2;2;2;2;2	4;3;3;2;2;2;2;2;2	4;3;3;2;2;2;2;2;2	Muscleblind-like protein 3	MBNL3	tr|B1AKI6|B1AKI6_HUMAN Muscleblind-like protein 3 OS=Homo sapiens OX=9606 GN=MBNL3 PE=1 SV=1;sp|Q9NUK0|MBNL3_HUMAN Muscleblind-like protein 3 OS=Homo sapiens OX=9606 GN=MBNL3 PE=1 SV=2;sp|Q9NUK0-4|MBNL3_HUMAN Isoform 4 of Muscleblind-like protein 3 OS=Homo	9	5	4	4	0	0	0	0	1	0	3	1	2	2	2	1	0	0	0	0	1	0	3	1	2	2	2	0	0	0	0	0	1	0	3	1	2	2	2	0	35.1
655	Q9Y6B7;B1ALD0;B1ALD3;B1ALD1;Q9Y6B7-2	Q9Y6B7;B1ALD0	3;3;1;1;1	3;3;1;1;1	3;3;1;1;1	AP-4 complex subunit beta-1;AP complex subunit beta	AP4B1	sp|Q9Y6B7|AP4B1_HUMAN AP-4 complex subunit beta-1 OS=Homo sapiens OX=9606 GN=AP4B1 PE=1 SV=2;tr|B1ALD0|B1ALD0_HUMAN AP complex subunit beta OS=Homo sapiens OX=9606 GN=AP4B1 PE=1 SV=1	5	3	3	3	0	0	1	0	0	0	0	0	2	0	0	0	0	0	1	0	0	0	0	0	2	0	0	0	0	0	1	0	0	0	0	0	2	0	0	0	7.4
656	Q9P0T7;B1ALM7;B1ALM8;B1ALM4;B1ALM5	Q9P0T7;B1ALM7;B1ALM8;B1ALM4;B1ALM5	1;1;1;1;1	1;1;1;1;1	1;1;1;1;1	Transmembrane protein 9	TMEM9	sp|Q9P0T7|TMEM9_HUMAN Transmembrane protein 9 OS=Homo sapiens OX=9606 GN=TMEM9 PE=1 SV=1;tr|B1ALM7|B1ALM7_HUMAN Transmembrane protein 9 (Fragment) OS=Homo sapiens OX=9606 GN=TMEM9 PE=1 SV=1;tr|B1ALM8|B1ALM8_HUMAN Transmembrane protein 9 (Fragment) OS=Homo	5	1	1	1	0	0	1	0	0	0	0	0	0	0	0	0	0	0	1	0	0	0	0	0	0	0	0	0	0	0	1	0	0	0	0	0	0	0	0	0	10.4
657	Q9HAN9;B1AN62	Q9HAN9;B1AN62	1;1	1;1	1;1	Nicotinamide/nicotinic acid mononucleotide adenylyltransferase 1	NMNAT1	sp|Q9HAN9|NMNA1_HUMAN Nicotinamide/nicotinic acid mononucleotide adenylyltransferase 1 OS=Homo sapiens OX=9606 GN=NMNAT1 PE=1 SV=1;tr|B1AN62|B1AN62_HUMAN Nicotinamide/nicotinic acid mononucleotide adenylyltransferase 1 OS=Homo sapiens OX=9606 GN=NMNAT1 PE=	2	1	1	1	0	0	1	0	0	0	0	0	0	0	0	0	0	0	1	0	0	0	0	0	0	0	0	0	0	0	1	0	0	0	0	0	0	0	0	0	7.2
658	Q6ZN30;B1APH0	Q6ZN30;B1APH0	1;1	1;1	1;1	Zinc finger protein basonuclin-2	BNC2	sp|Q6ZN30|BNC2_HUMAN Zinc finger protein basonuclin-2 OS=Homo sapiens OX=9606 GN=BNC2 PE=1 SV=1;tr|B1APH0|B1APH0_HUMAN Zinc finger protein basonuclin-2 OS=Homo sapiens OX=9606 GN=BNC2 PE=1 SV=1	2	1	1	1	0	0	0	0	0	0	0	1	0	0	0	0	0	0	0	0	0	0	0	1	0	0	0	0	0	0	0	0	0	0	0	1	0	0	0	0	1.3
659	P42566;B1AUU8;P42566-2	P42566;B1AUU8	4;4;1	4;4;1	4;4;1	Epidermal growth factor receptor substrate 15	EPS15	sp|P42566|EPS15_HUMAN Epidermal growth factor receptor substrate 15 OS=Homo sapiens OX=9606 GN=EPS15 PE=1 SV=2;tr|B1AUU8|B1AUU8_HUMAN Epidermal growth factor receptor substrate 15 OS=Homo sapiens OX=9606 GN=EPS15 PE=1 SV=1	3	4	4	4	0	0	1	0	4	0	0	0	1	0	0	0	0	0	1	0	4	0	0	0	1	0	0	0	0	0	1	0	4	0	0	0	1	0	0	0	5.1
660	P51812;B4DG22;B7ZB17;B1AXG1;A0A2R8Y603;A0A2R8Y7S9;E9PGT3;E9PMM7;F2Z2J1;B7Z3B5;D6R910;Q15418;Q15349-3;Q15349-2;Q15418-3;Q15418-2;Q15349;Q15418-4;Q9UK32-2;D6RHW7;Q9UK32	P51812;B4DG22;B7ZB17;B1AXG1	10;10;10;10;4;3;2;2;2;2;2;2;2;2;2;2;2;2;1;1;1	10;10;10;10;4;3;2;2;2;2;2;2;2;2;2;2;2;2;1;1;1	10;10;10;10;4;3;2;2;2;2;2;2;2;2;2;2;2;2;1;1;1	Ribosomal protein S6 kinase alpha-3	RPS6KA3	sp|P51812|KS6A3_HUMAN Ribosomal protein S6 kinase alpha-3 OS=Homo sapiens OX=9606 GN=RPS6KA3 PE=1 SV=1;tr|B4DG22|B4DG22_HUMAN Non-specific serine/threonine protein kinase OS=Homo sapiens OX=9606 GN=RPS6KA3 PE=1 SV=1;tr|B7ZB17|B7ZB17_HUMAN Non-specific seri	21	10	10	10	3	0	5	1	7	0	0	0	0	0	0	0	3	0	5	1	7	0	0	0	0	0	0	0	3	0	5	1	7	0	0	0	0	0	0	0	17.2
661	Q86TH1;B1B0D4	Q86TH1;B1B0D4	1;1	1;1	1;1	ADAMTS-like protein 2	ADAMTSL2	sp|Q86TH1|ATL2_HUMAN ADAMTS-like protein 2 OS=Homo sapiens OX=9606 GN=ADAMTSL2 PE=1 SV=1;tr|B1B0D4|B1B0D4_HUMAN ADAMTS-like protein 2 OS=Homo sapiens OX=9606 GN=ADAMTSL2 PE=1 SV=1	2	1	1	1	0	0	0	0	0	0	0	0	0	1	0	1	0	0	0	0	0	0	0	0	0	1	0	1	0	0	0	0	0	0	0	0	0	1	0	1	1.2
662	G3V4C1;B2R5W2;P07910-2;B4DY08;G3V4W0;P07910-4;G3V2D6;P07910-3;G3V251;G3V5V7;A0A0G2JNQ3;O60812;B7ZW38;A0A0G2JPF8;G3V5X6;P0DMR1;B2RXH8;G3V3K6;B4DSU6;G3V4M8;G3V2H6	G3V4C1;B2R5W2;P07910-2;B4DY08;G3V4W0;P07910-4;G3V2D6;P07910-3;G3V251;G3V5V7	14;14;14;13;13;12;9;8;7;7;6;6;6;6;6;6;6;6;5;4;3	14;14;14;13;13;12;9;8;7;7;6;6;6;6;6;6;6;6;5;4;3	2;2;2;2;2;2;2;0;2;0;0;0;0;0;1;0;0;1;0;0;0	Heterogeneous nuclear ribonucleoproteins C1/C2	HNRNPC	tr|G3V4C1|G3V4C1_HUMAN Heterogeneous nuclear ribonucleoproteins C1/C2 OS=Homo sapiens OX=9606 GN=HNRNPC PE=1 SV=1;tr|B2R5W2|B2R5W2_HUMAN Heterogeneous nuclear ribonucleoproteins C1/C2 OS=Homo sapiens OX=9606 GN=HNRNPC PE=1 SV=1;sp|P07910-2|HNRPC_HUMAN Isof	21	14	14	2	4	12	9	11	3	11	0	9	7	11	0	9	4	12	9	11	3	11	0	9	7	11	0	9	0	1	1	1	0	1	0	1	1	2	0	1	42.5
663	P61289;K7EMD0;K7EPX6;K7EKR3;B3KQ25;K7ESG5;P61289-3;P61289-2	P61289;K7EMD0;K7EPX6;K7EKR3;B3KQ25;K7ESG5;P61289-3;P61289-2	1;1;1;1;1;1;1;1	1;1;1;1;1;1;1;1	1;1;1;1;1;1;1;1	Proteasome activator complex subunit 3	PSME3	sp|P61289|PSME3_HUMAN Proteasome activator complex subunit 3 OS=Homo sapiens OX=9606 GN=PSME3 PE=1 SV=1;tr|K7EMD0|K7EMD0_HUMAN Proteasome activator complex subunit 3 (Fragment) OS=Homo sapiens OX=9606 GN=PSME3 PE=1 SV=1;tr|K7EPX6|K7EPX6_HUMAN Proteasome ac	8	1	1	1	0	0	0	0	1	0	0	0	0	0	0	0	0	0	0	0	1	0	0	0	0	0	0	0	0	0	0	0	1	0	0	0	0	0	0	0	3.5
664	Q9UBU8;Q9UBU8-2;H0YLJ3;B3KTM8;Q9UBU8-3;H0YNI8;H0YNX3;H0YLV1;H0YMT8;H0YM21;H0YNE0;H0YMJ0	Q9UBU8;Q9UBU8-2;H0YLJ3;B3KTM8;Q9UBU8-3;H0YNI8;H0YNX3;H0YLV1;H0YMT8;H0YM21;H0YNE0;H0YMJ0	2;2;2;2;2;1;1;1;1;1;1;1	2;2;2;2;2;1;1;1;1;1;1;1	2;2;2;2;2;1;1;1;1;1;1;1	Mortality factor 4-like protein 1	MORF4L1	sp|Q9UBU8|MO4L1_HUMAN Mortality factor 4-like protein 1 OS=Homo sapiens OX=9606 GN=MORF4L1 PE=1 SV=2;sp|Q9UBU8-2|MO4L1_HUMAN Isoform 2 of Mortality factor 4-like protein 1 OS=Homo sapiens OX=9606 GN=MORF4L1;tr|H0YLJ3|H0YLJ3_HUMAN Mortality factor 4-like pr	12	2	2	2	0	0	2	0	0	0	0	0	0	0	0	0	0	0	2	0	0	0	0	0	0	0	0	0	0	0	2	0	0	0	0	0	0	0	0	0	13
665	Q70CQ3;F5H3L3;F5H8D3;B3KUS5	Q70CQ3;F5H3L3;F5H8D3;B3KUS5	2;2;2;2	2;2;2;2	2;2;2;2	Ubiquitin carboxyl-terminal hydrolase 30;Ubiquitin carboxyl-terminal hydrolase	USP30	sp|Q70CQ3|UBP30_HUMAN Ubiquitin carboxyl-terminal hydrolase 30 OS=Homo sapiens OX=9606 GN=USP30 PE=1 SV=1;tr|F5H3L3|F5H3L3_HUMAN Ubiquitin carboxyl-terminal hydrolase 30 (Fragment) OS=Homo sapiens OX=9606 GN=USP30 PE=1 SV=1;tr|F5H8D3|F5H8D3_HUMAN Ubiquitin	4	2	2	2	0	0	2	0	0	0	0	0	0	0	0	0	0	0	2	0	0	0	0	0	0	0	0	0	0	0	2	0	0	0	0	0	0	0	0	0	9.1
666	O14735;B3KY94;O14735-3;H3BUR9;O14735-2	O14735;B3KY94;O14735-3;H3BUR9	4;4;4;2;1	4;4;4;2;1	4;4;4;2;1	CDP-diacylglycerol--inositol 3-phosphatidyltransferase	CDIPT	sp|O14735|CDIPT_HUMAN CDP-diacylglycerol--inositol 3-phosphatidyltransferase OS=Homo sapiens OX=9606 GN=CDIPT PE=1 SV=1;tr|B3KY94|B3KY94_HUMAN CDP-diacylglycerol--inositol 3-phosphatidyltransferase OS=Homo sapiens OX=9606 GN=CDIPT PE=1 SV=1;sp|O14735-3|CDI	5	4	4	4	1	0	3	0	1	1	1	0	3	0	1	0	1	0	3	0	1	1	1	0	3	0	1	0	1	0	3	0	1	1	1	0	3	0	1	0	22.5
667	P16455;B4DEE8	P16455;B4DEE8	3;3	3;3	3;3	Methylated-DNA--protein-cysteine methyltransferase	MGMT	sp|P16455|MGMT_HUMAN Methylated-DNA--protein-cysteine methyltransferase OS=Homo sapiens OX=9606 GN=MGMT PE=1 SV=1;tr|B4DEE8|B4DEE8_HUMAN 6-O-methylguanine-DNA methyltransferase OS=Homo sapiens OX=9606 GN=MGMT PE=1 SV=1	2	3	3	3	1	0	0	2	0	0	1	0	0	0	0	0	1	0	0	2	0	0	1	0	0	0	0	0	1	0	0	2	0	0	1	0	0	0	0	0	22.2
668	Q9NZU5;C9IYS1;H7C3D2;B4DEY6;Q9NZU5-2	Q9NZU5;C9IYS1;H7C3D2;B4DEY6;Q9NZU5-2	1;1;1;1;1	1;1;1;1;1	1;1;1;1;1	LIM and cysteine-rich domains protein 1	LMCD1	sp|Q9NZU5|LMCD1_HUMAN LIM and cysteine-rich domains protein 1 OS=Homo sapiens OX=9606 GN=LMCD1 PE=1 SV=1;tr|C9IYS1|C9IYS1_HUMAN LIM and cysteine-rich domains protein 1 (Fragment) OS=Homo sapiens OX=9606 GN=LMCD1 PE=1 SV=8;tr|H7C3D2|H7C3D2_HUMAN LIM and cys	5	1	1	1	0	0	0	0	0	0	1	0	1	0	0	0	0	0	0	0	0	0	1	0	1	0	0	0	0	0	0	0	0	0	1	0	1	0	0	0	5.2
669	P49190;B4DFN8	P49190;B4DFN8	2;2	2;2	2;2	Parathyroid hormone 2 receptor	PTH2R	sp|P49190|PTH2R_HUMAN Parathyroid hormone 2 receptor OS=Homo sapiens OX=9606 GN=PTH2R PE=1 SV=1;tr|B4DFN8|B4DFN8_HUMAN Parathyroid hormone 2 receptor OS=Homo sapiens OX=9606 GN=PTH2R PE=2 SV=1	2	2	2	2	1	0	1	1	1	1	1	1	2	1	2	1	1	0	1	1	1	1	1	1	2	1	2	1	1	0	1	1	1	1	1	1	2	1	2	1	6.7
670	Q96DH6;Q96DH6-2;B4DHE8;J3QKT5;J3KTC1;B4DM51;Q96DH6-3	Q96DH6;Q96DH6-2;B4DHE8;J3QKT5;J3KTC1;B4DM51;Q96DH6-3	2;2;2;1;1;1;1	2;2;2;1;1;1;1	2;2;2;1;1;1;1	RNA-binding protein Musashi homolog 2	MSI2	sp|Q96DH6|MSI2H_HUMAN RNA-binding protein Musashi homolog 2 OS=Homo sapiens OX=9606 GN=MSI2 PE=1 SV=1;sp|Q96DH6-2|MSI2H_HUMAN Isoform 2 of RNA-binding protein Musashi homolog 2 OS=Homo sapiens OX=9606 GN=MSI2;tr|B4DHE8|B4DHE8_HUMAN RNA-binding protein Musa	7	2	2	2	0	0	0	0	0	0	1	0	0	0	1	0	0	0	0	0	0	0	1	0	0	0	1	0	0	0	0	0	0	0	1	0	0	0	1	0	9.1
671	Q9Y6N1;I3L4E7;B4DI26;Q9Y6N1-2	Q9Y6N1;I3L4E7;B4DI26;Q9Y6N1-2	1;1;1;1	1;1;1;1	1;1;1;1	Cytochrome c oxidase assembly protein COX11, mitochondrial	COX11	sp|Q9Y6N1|COX11_HUMAN Cytochrome c oxidase assembly protein COX11, mitochondrial OS=Homo sapiens OX=9606 GN=COX11 PE=1 SV=3;tr|I3L4E7|I3L4E7_HUMAN Cytochrome c oxidase assembly protein COX11, mitochondrial (Fragment) OS=Homo sapiens OX=9606 GN=COX11 PE=1 S	4	1	1	1	0	0	0	0	0	0	0	0	1	0	0	0	0	0	0	0	0	0	0	0	1	0	0	0	0	0	0	0	0	0	0	0	1	0	0	0	9.4
672	B4DL54;P49356;P49356-2	B4DL54;P49356;P49356-2	7;4;4	7;4;4	4;4;4	Protein farnesyltransferase subunit beta	CHURC1-FNTB;FNTB	tr|B4DL54|B4DL54_HUMAN Protein farnesyltransferase subunit beta OS=Homo sapiens OX=9606 GN=CHURC1-FNTB PE=2 SV=1;sp|P49356|FNTB_HUMAN Protein farnesyltransferase subunit beta OS=Homo sapiens OX=9606 GN=FNTB PE=1 SV=1;sp|P49356-2|FNTB_HUMAN Isoform 2 of Pro	3	7	7	4	0	0	3	0	0	0	0	0	0	0	4	0	0	0	3	0	0	0	0	0	0	0	4	0	0	0	0	0	0	0	0	0	0	0	4	0	17.6
673	B4DLN1;I3L1E8;P52815	B4DLN1	17;5;4	17;5;4	4;0;4			tr|B4DLN1|B4DLN1_HUMAN cDNA FLJ60124, highly similar to Mitochondrial dicarboxylate carrier OS=Homo sapiens OX=9606 PE=2 SV=1	3	17	17	4	7	1	12	1	5	2	3	1	8	1	7	2	7	1	12	1	5	2	3	1	8	1	7	2	0	0	4	0	0	0	0	0	0	0	0	0	46.2
674	Q99551;B4DPR9	Q99551;B4DPR9	1;1	1;1	1;1	Transcription termination factor 1, mitochondrial	MTERF1	sp|Q99551|MTEF1_HUMAN Transcription termination factor 1, mitochondrial OS=Homo sapiens OX=9606 GN=MTERF1 PE=1 SV=1;tr|B4DPR9|B4DPR9_HUMAN Transcription termination factor 1, mitochondrial OS=Homo sapiens OX=9606 GN=MTERF1 PE=1 SV=1	2	1	1	1	0	0	1	0	0	0	0	0	0	0	0	0	0	0	1	0	0	0	0	0	0	0	0	0	0	0	1	0	0	0	0	0	0	0	0	0	3.5
675	P61619;B4DR61;P61619-3;H7C1Q9;H7C069;A6NK38;F2Z2C7;A6NIF9	P61619;B4DR61;P61619-3	12;12;9;2;2;2;2;2	12;12;9;2;2;2;2;2	9;9;8;0;0;0;0;0	Protein transport protein Sec61 subunit alpha isoform 1	SEC61A1	sp|P61619|S61A1_HUMAN Protein transport protein Sec61 subunit alpha isoform 1 OS=Homo sapiens OX=9606 GN=SEC61A1 PE=1 SV=2;tr|B4DR61|B4DR61_HUMAN Protein transport protein Sec61 subunit alpha isoform 1 OS=Homo sapiens OX=9606 GN=SEC61A1 PE=1 SV=1;sp|P61619	8	12	12	9	8	5	8	6	8	2	6	5	8	6	7	6	8	5	8	6	8	2	6	5	8	6	7	6	6	2	6	4	6	1	4	2	6	3	5	4	42.9
676	Q9Y6E0-2;B4DR80	Q9Y6E0-2;B4DR80	5;5	1;1	1;1	Serine/threonine-protein kinase 24;Serine/threonine-protein kinase 24 36 kDa subunit;Serine/threonine-protein kinase 24 12 kDa subunit	STK24	sp|Q9Y6E0-2|STK24_HUMAN Isoform A of Serine/threonine-protein kinase 24 OS=Homo sapiens OX=9606 GN=STK24;tr|B4DR80|B4DR80_HUMAN Serine/threonine-protein kinase 24 OS=Homo sapiens OX=9606 GN=STK24 PE=1 SV=1	2	5	1	1	0	0	2	0	0	0	0	0	5	0	0	0	0	0	0	0	0	0	0	0	1	0	0	0	0	0	0	0	0	0	0	0	1	0	0	0	13
677	Q969W8;B4DRR6;Q969W8-2;C9J6X1	Q969W8;B4DRR6;Q969W8-2	5;5;5;2	5;5;5;2	5;5;5;2	Zinc finger protein 566	ZNF566	sp|Q969W8|ZN566_HUMAN Zinc finger protein 566 OS=Homo sapiens OX=9606 GN=ZNF566 PE=1 SV=1;tr|B4DRR6|B4DRR6_HUMAN Zinc finger protein 566 OS=Homo sapiens OX=9606 GN=ZNF566 PE=1 SV=1;sp|Q969W8-2|ZN566_HUMAN Isoform 2 of Zinc finger protein 566 OS=Homo sapien	4	5	5	5	0	4	0	0	0	5	0	0	0	0	0	0	0	4	0	0	0	5	0	0	0	0	0	0	0	4	0	0	0	5	0	0	0	0	0	0	22.7
678	B4DRX9;Q8WU58	B4DRX9;Q8WU58	7;6	7;6	7;6	Protein FAM222B	FAM222B	tr|B4DRX9|B4DRX9_HUMAN Protein FAM222B OS=Homo sapiens OX=9606 GN=FAM222B PE=1 SV=1;sp|Q8WU58|F222B_HUMAN Protein FAM222B OS=Homo sapiens OX=9606 GN=FAM222B PE=1 SV=1	2	7	7	7	3	0	0	0	0	0	5	0	1	0	3	0	3	0	0	0	0	0	5	0	1	0	3	0	3	0	0	0	0	0	5	0	1	0	3	0	41.2
679	P04626;P04626-6;P04626-5;B4DTR1;J3QLU9;P04626-4;A0A0A0MSE1;J3KTI5;F5H1T4;J3QRX1;H3BLT0;Q15303;P04626-3;Q15303-4;Q15303-3;Q15303-2;P04626-2	P04626;P04626-6;P04626-5;B4DTR1;J3QLU9;P04626-4;A0A0A0MSE1;J3KTI5;F5H1T4;J3QRX1;H3BLT0;Q15303;P04626-3;Q15303-4;Q15303-3;Q15303-2;P04626-2	2;2;2;2;2;2;1;1;1;1;1;1;1;1;1;1;1	1;1;1;1;1;1;0;0;1;1;0;0;0;0;0;0;0	1;1;1;1;1;1;0;0;1;1;0;0;0;0;0;0;0	Receptor tyrosine-protein kinase erbB-2;Receptor protein-tyrosine kinase;Receptor tyrosine-protein kinase erbB-4;ERBB4 intracellular domain	ERBB2;ERBB4	sp|P04626|ERBB2_HUMAN Receptor tyrosine-protein kinase erbB-2 OS=Homo sapiens OX=9606 GN=ERBB2 PE=1 SV=1;sp|P04626-6|ERBB2_HUMAN Isoform 6 of Receptor tyrosine-protein kinase erbB-2 OS=Homo sapiens OX=9606 GN=ERBB2;sp|P04626-5|ERBB2_HUMAN Isoform 5 of Rece	17	2	1	1	0	0	0	0	0	0	1	0	2	0	1	0	0	0	0	0	0	0	0	0	1	0	0	0	0	0	0	0	0	0	0	0	1	0	0	0	1.8
680	Q13126;B4DUC8;Q13126-4;Q13126-3;Q13126-2;F2Z2F3;J3QSB7;Q13126-7;Q13126-6;Q13126-5;F8WES2;A0A2R8Y4K0	Q13126;B4DUC8;Q13126-4;Q13126-3;Q13126-2;F2Z2F3;J3QSB7;Q13126-7;Q13126-6;Q13126-5	3;3;3;3;3;2;2;2;2;2;1;1	3;3;3;3;3;2;2;2;2;2;1;1	3;3;3;3;3;2;2;2;2;2;1;1	S-methyl-5-thioadenosine phosphorylase;Purine nucleoside phosphorylase	MTAP	sp|Q13126|MTAP_HUMAN S-methyl-5-thioadenosine phosphorylase OS=Homo sapiens OX=9606 GN=MTAP PE=1 SV=2;tr|B4DUC8|B4DUC8_HUMAN S-methyl-5-thioadenosine phosphorylase OS=Homo sapiens OX=9606 GN=MTAP PE=1 SV=1;sp|Q13126-4|MTAP_HUMAN Isoform 4 of S-methyl-5-	12	3	3	3	1	0	0	0	1	0	3	0	0	0	3	0	1	0	0	0	1	0	3	0	0	0	3	0	1	0	0	0	1	0	3	0	0	0	3	0	20.5
681	Q99439;B4DUT8;B4DDF4;Q99439-2;H3BVI6;A0A087X271;A0A087X1X5;K7ES69;H3BQH0;U3KPS3;A0A087WV51	Q99439;B4DUT8;B4DDF4;Q99439-2;H3BVI6;A0A087X271;A0A087X1X5	22;22;21;18;17;14;12;10;6;3;2	22;22;21;18;17;14;12;10;6;3;2	20;20;19;16;15;13;11;9;5;2;2	Calponin-2;Calponin	CNN2	sp|Q99439|CNN2_HUMAN Calponin-2 OS=Homo sapiens OX=9606 GN=CNN2 PE=1 SV=4;tr|B4DUT8|B4DUT8_HUMAN Calponin OS=Homo sapiens OX=9606 GN=CNN2 PE=1 SV=1;tr|B4DDF4|B4DDF4_HUMAN Calponin OS=Homo sapiens OX=9606 GN=CNN2 PE=1 SV=1;sp|Q99439-2|CNN2_HUMAN Isoform 2 o	11	22	22	20	20	3	6	2	17	3	21	15	9	14	19	14	20	3	6	2	17	3	21	15	9	14	19	14	19	3	5	2	16	3	19	14	9	13	18	13	91.9
682	Q8IZD4;F5H4R4;B4DVJ6	Q8IZD4;F5H4R4;B4DVJ6	1;1;1	1;1;1	1;1;1	mRNA-decapping enzyme 1B	DCP1B	sp|Q8IZD4|DCP1B_HUMAN mRNA-decapping enzyme 1B OS=Homo sapiens OX=9606 GN=DCP1B PE=1 SV=2;tr|F5H4R4|F5H4R4_HUMAN mRNA-decapping enzyme 1B OS=Homo sapiens OX=9606 GN=DCP1B PE=1 SV=1;tr|B4DVJ6|B4DVJ6_HUMAN cDNA FLJ57612, highly similar to mRNA decapping enzy	3	1	1	1	0	0	0	0	1	0	0	0	1	0	1	0	0	0	0	0	1	0	0	0	1	0	1	0	0	0	0	0	1	0	0	0	1	0	1	0	1.8
683	Q9Y5B8;E9PNU1;B4DXC8;Q9Y5B8-2	Q9Y5B8;E9PNU1;B4DXC8;Q9Y5B8-2	4;4;4;3	4;4;4;3	4;4;4;3	Nucleoside diphosphate kinase 7	NME7	sp|Q9Y5B8|NDK7_HUMAN Nucleoside diphosphate kinase 7 OS=Homo sapiens OX=9606 GN=NME7 PE=1 SV=1;tr|E9PNU1|E9PNU1_HUMAN Nucleoside diphosphate kinase 7 OS=Homo sapiens OX=9606 GN=NME7 PE=1 SV=1;tr|B4DXC8|B4DXC8_HUMAN Nucleoside diphosphate kinase 7 OS=Homo s	4	4	4	4	3	0	0	0	3	0	1	0	0	0	3	0	3	0	0	0	3	0	1	0	0	0	3	0	3	0	0	0	3	0	1	0	0	0	3	0	15.4
684	P61158;F8WDR7;B4DXW1	P61158;F8WDR7;B4DXW1	2;2;2	2;2;2	2;2;2	Actin-related protein 3	ACTR3	sp|P61158|ARP3_HUMAN Actin-related protein 3 OS=Homo sapiens OX=9606 GN=ACTR3 PE=1 SV=3;tr|F8WDR7|F8WDR7_HUMAN Actin-related protein 3 (Fragment) OS=Homo sapiens OX=9606 GN=ACTR3 PE=1 SV=2;tr|B4DXW1|B4DXW1_HUMAN Actin-related protein 3 OS=Homo sapiens OX=9	3	2	2	2	2	0	0	0	1	0	0	0	0	0	0	0	2	0	0	0	1	0	0	0	0	0	0	0	2	0	0	0	1	0	0	0	0	0	0	0	10.3
685	Q9UBS9;B4DYM4;Q9UBS9-2	Q9UBS9;B4DYM4;Q9UBS9-2	1;1;1	1;1;1	1;1;1	SUN domain-containing ossification factor	SUCO	sp|Q9UBS9|SUCO_HUMAN SUN domain-containing ossification factor OS=Homo sapiens OX=9606 GN=SUCO PE=1 SV=1;tr|B4DYM4|B4DYM4_HUMAN SUN domain-containing ossification factor OS=Homo sapiens OX=9606 GN=SUCO PE=1 SV=1;sp|Q9UBS9-2|SUCO_HUMAN Isoform 2 of SUN doma	3	1	1	1	0	0	1	0	0	0	0	0	0	0	0	0	0	0	1	0	0	0	0	0	0	0	0	0	0	0	1	0	0	0	0	0	0	0	0	0	1.9
686	Q99640;B4DZM6;Q99640-4;Q99640-3;A6NHV6;Q99640-2	Q99640;B4DZM6;Q99640-4;Q99640-3;A6NHV6;Q99640-2	2;2;2;2;1;1	2;2;2;2;1;1	2;2;2;2;1;1	Membrane-associated tyrosine- and threonine-specific cdc2-inhibitory kinase	PKMYT1	sp|Q99640|PMYT1_HUMAN Membrane-associated tyrosine- and threonine-specific cdc2-inhibitory kinase OS=Homo sapiens OX=9606 GN=PKMYT1 PE=1 SV=1;tr|B4DZM6|B4DZM6_HUMAN Membrane-associated tyrosine- and threonine-specific cdc2-inhibitory kinase OS=Homo sapiens	6	2	2	2	0	0	1	0	0	0	0	0	0	0	1	0	0	0	1	0	0	0	0	0	0	0	1	0	0	0	1	0	0	0	0	0	0	0	1	0	4.4
687	Q16539;Q16539-2;E7EX54;B4E0K5;Q16539-5;Q16539-3;Q16539-4;B5TY33;H7C4E2	Q16539;Q16539-2;E7EX54;B4E0K5;Q16539-5;Q16539-3;Q16539-4;B5TY33	3;3;3;3;3;3;3;2;1	3;3;3;3;3;3;3;2;1	3;3;3;3;3;3;3;2;1	Mitogen-activated protein kinase 14	MAPK14	sp|Q16539|MK14_HUMAN Mitogen-activated protein kinase 14 OS=Homo sapiens OX=9606 GN=MAPK14 PE=1 SV=3;sp|Q16539-2|MK14_HUMAN Isoform CSBP1 of Mitogen-activated protein kinase 14 OS=Homo sapiens OX=9606 GN=MAPK14;tr|E7EX54|E7EX54_HUMAN Mitogen-activated prot	9	3	3	3	0	0	0	0	0	0	2	0	0	0	3	0	0	0	0	0	0	0	2	0	0	0	3	0	0	0	0	0	0	0	2	0	0	0	3	0	10.6
688	P50542;P50542-3;P50542-4;B4E0T2;P50542-2;H0YGT8	P50542;P50542-3;P50542-4;B4E0T2;P50542-2	3;3;3;3;3;1	3;3;3;3;3;1	3;3;3;3;3;1	Peroxisomal targeting signal 1 receptor	PEX5	sp|P50542|PEX5_HUMAN Peroxisomal targeting signal 1 receptor OS=Homo sapiens OX=9606 GN=PEX5 PE=1 SV=3;sp|P50542-3|PEX5_HUMAN Isoform 3 of Peroxisomal targeting signal 1 receptor OS=Homo sapiens OX=9606 GN=PEX5;sp|P50542-4|PEX5_HUMAN Isoform 4 of Peroxisom	6	3	3	3	0	0	0	0	0	0	0	0	1	0	2	0	0	0	0	0	0	0	0	0	1	0	2	0	0	0	0	0	0	0	0	0	1	0	2	0	4.9
689	Q9P289;Q8NBY1;B4E0Y9;Q9P289-2;Q9P289-3;C9JJV0;Q5JV98	Q9P289;Q8NBY1;B4E0Y9;Q9P289-2;Q9P289-3	10;10;10;9;7;3;1	10;10;10;9;7;3;1	5;5;5;4;4;0;0	Serine/threonine-protein kinase 26	STK26	sp|Q9P289|STK26_HUMAN Serine/threonine-protein kinase 26 OS=Homo sapiens OX=9606 GN=STK26 PE=1 SV=2;tr|Q8NBY1|Q8NBY1_HUMAN Serine/threonine-protein kinase 26 OS=Homo sapiens OX=9606 GN=STK26 PE=1 SV=1;tr|B4E0Y9|B4E0Y9_HUMAN Serine/threonine-protein kinase	7	10	10	5	0	0	9	0	0	0	0	0	6	0	0	0	0	0	9	0	0	0	0	0	6	0	0	0	0	0	5	0	0	0	0	0	2	0	0	0	33.7
690	Q9BUN8;B4E1G1;Q9BUN8-2;E5RGY0	Q9BUN8;B4E1G1;Q9BUN8-2	5;5;5;2	5;5;5;2	5;5;5;2	Derlin-1	DERL1	sp|Q9BUN8|DERL1_HUMAN Derlin-1 OS=Homo sapiens OX=9606 GN=DERL1 PE=1 SV=1;tr|B4E1G1|B4E1G1_HUMAN Derlin OS=Homo sapiens OX=9606 GN=DERL1 PE=1 SV=1;sp|Q9BUN8-2|DERL1_HUMAN Isoform 2 of Derlin-1 OS=Homo sapiens OX=9606 GN=DERL1	4	5	5	5	4	3	5	1	4	1	2	1	3	0	4	1	4	3	5	1	4	1	2	1	3	0	4	1	4	3	5	1	4	1	2	1	3	0	4	1	26.3
691	O14730;B4E1Q4;O14730-2	O14730;B4E1Q4;O14730-2	7;7;7	7;7;7	7;7;7	Serine/threonine-protein kinase RIO3	RIOK3	sp|O14730|RIOK3_HUMAN Serine/threonine-protein kinase RIO3 OS=Homo sapiens OX=9606 GN=RIOK3 PE=1 SV=2;tr|B4E1Q4|B4E1Q4_HUMAN Serine/threonine-protein kinase RIO3 OS=Homo sapiens OX=9606 GN=RIOK3 PE=1 SV=1;sp|O14730-2|RIOK3_HUMAN Isoform 2 of Serine/threoni	3	7	7	7	0	0	6	0	0	0	0	0	3	0	1	0	0	0	6	0	0	0	0	0	3	0	1	0	0	0	6	0	0	0	0	0	3	0	1	0	22.2
692	Q96RU2;G3V1N5;B4E3L3;Q96RU2-2;H0YG96;Q96RU2-3	Q96RU2;G3V1N5;B4E3L3;Q96RU2-2;H0YG96;Q96RU2-3	2;2;2;2;1;1	2;2;2;2;1;1	2;2;2;2;1;1	Ubiquitin carboxyl-terminal hydrolase 28;Ubiquitin carboxyl-terminal hydrolase	USP28	sp|Q96RU2|UBP28_HUMAN Ubiquitin carboxyl-terminal hydrolase 28 OS=Homo sapiens OX=9606 GN=USP28 PE=1 SV=1;tr|G3V1N5|G3V1N5_HUMAN Ubiquitin carboxyl-terminal hydrolase 28 OS=Homo sapiens OX=9606 GN=USP28 PE=1 SV=1;tr|B4E3L3|B4E3L3_HUMAN Ubiquitin carboxyl-t	6	2	2	2	0	0	0	2	0	0	0	0	0	0	0	0	0	0	0	2	0	0	0	0	0	0	0	0	0	0	0	2	0	0	0	0	0	0	0	0	2.1
693	Q9ULV4;Q9ULV4-2;B4E3S0;Q9ULV4-3;H0YHL7;J3KSS5;Q6QEF8-4;Q6QEF8-2;F8VV53;Q6QEF8-5;Q6QEF8;F8VUX3;Q6QEF8-3;F8W1H8;F8VVB7;F8VTT6;F8VRE9;F8VSA4;J3QLV6	Q9ULV4;Q9ULV4-2;B4E3S0;Q9ULV4-3	8;8;8;8;3;1;1;1;1;1;1;1;1;1;1;1;1;1;1	8;8;8;8;3;1;1;1;1;1;1;1;1;1;1;1;1;1;1	8;8;8;8;3;1;1;1;1;1;1;1;1;1;1;1;1;1;1	Coronin-1C;Coronin	CORO1C	sp|Q9ULV4|COR1C_HUMAN Coronin-1C OS=Homo sapiens OX=9606 GN=CORO1C PE=1 SV=1;sp|Q9ULV4-2|COR1C_HUMAN Isoform 2 of Coronin-1C OS=Homo sapiens OX=9606 GN=CORO1C;tr|B4E3S0|B4E3S0_HUMAN Coronin OS=Homo sapiens OX=9606 GN=CORO1C PE=1 SV=1;sp|Q9ULV4-3|COR1C_HUMA	19	8	8	8	1	2	7	2	0	2	1	4	1	3	1	4	1	2	7	2	0	2	1	4	1	3	1	4	1	2	7	2	0	2	1	4	1	3	1	4	29.3
694	Q9HC35;Q9HC35-2;B5MBZ0	Q9HC35;Q9HC35-2;B5MBZ0	8;8;8	8;8;8	8;8;8	Echinoderm microtubule-associated protein-like 4	EML4	sp|Q9HC35|EMAL4_HUMAN Echinoderm microtubule-associated protein-like 4 OS=Homo sapiens OX=9606 GN=EML4 PE=1 SV=3;sp|Q9HC35-2|EMAL4_HUMAN Isoform 2 of Echinoderm microtubule-associated protein-like 4 OS=Homo sapiens OX=9606 GN=EML4;tr|B5MBZ0|B5MBZ0_HUMAN Ec	3	8	8	8	0	0	3	1	0	0	0	0	5	0	0	0	0	0	3	1	0	0	0	0	5	0	0	0	0	0	3	1	0	0	0	0	5	0	0	0	13.8
695	Q9UDX5;B5MC22;H7C417;F8WEN7;Q9UDX5-2	Q9UDX5;B5MC22;H7C417	3;3;2;1;1	3;3;2;1;1	3;3;2;1;1	Mitochondrial fission process protein 1	MTFP1	sp|Q9UDX5|MTFP1_HUMAN Mitochondrial fission process protein 1 OS=Homo sapiens OX=9606 GN=MTFP1 PE=1 SV=1;tr|B5MC22|B5MC22_HUMAN Mitochondrial 18 kDa protein OS=Homo sapiens OX=9606 GN=MTFP1 PE=1 SV=1;tr|H7C417|H7C417_HUMAN Mitochondrial 18 kDa protein (Fra	5	3	3	3	0	0	3	0	0	0	0	0	0	0	0	0	0	0	3	0	0	0	0	0	0	0	0	0	0	0	3	0	0	0	0	0	0	0	0	0	27.1
696	Q6NXT4;B5MCR8;Q6NXT4-4;Q6NXT4-2;Q6NXT4-3;C9JZR9	Q6NXT4;B5MCR8;Q6NXT4-4;Q6NXT4-2;Q6NXT4-3	10;10;10;10;8;3	10;10;10;10;8;3	10;10;10;10;8;3	Zinc transporter 6	SLC30A6	sp|Q6NXT4|ZNT6_HUMAN Zinc transporter 6 OS=Homo sapiens OX=9606 GN=SLC30A6 PE=1 SV=2;tr|B5MCR8|B5MCR8_HUMAN Solute carrier family 30 (Zinc transporter), member 6, isoform CRA_b OS=Homo sapiens OX=9606 GN=SLC30A6 PE=1 SV=1;sp|Q6NXT4-4|ZNT6_HUMAN Isoform 4 o	6	10	10	10	0	0	10	0	0	0	0	0	0	0	0	0	0	0	10	0	0	0	0	0	0	0	0	0	0	0	10	0	0	0	0	0	0	0	0	0	37.7
697	Q6ZWJ1;B5MCT9;E7EPP7;Q6ZWJ1-2	Q6ZWJ1;B5MCT9;E7EPP7;Q6ZWJ1-2	2;2;2;2	2;2;2;2	2;2;2;2	Syntaxin-binding protein 4	STXBP4	sp|Q6ZWJ1|STXB4_HUMAN Syntaxin-binding protein 4 OS=Homo sapiens OX=9606 GN=STXBP4 PE=1 SV=2;tr|B5MCT9|B5MCT9_HUMAN Syntaxin-binding protein 4 OS=Homo sapiens OX=9606 GN=STXBP4 PE=1 SV=1;tr|E7EPP7|E7EPP7_HUMAN Syntaxin-binding protein 4 OS=Homo sapiens OX=	4	2	2	2	0	0	0	0	0	0	0	0	0	0	2	0	0	0	0	0	0	0	0	0	0	0	2	0	0	0	0	0	0	0	0	0	0	0	2	0	4.5
698	B5MCU0;Q9Y2K5;A0A0U1RRA6;B5MCG9;H7C0E9;Q9Y2K5-2;H0YIX9;Q9Y2K5-3	B5MCU0;Q9Y2K5;A0A0U1RRA6;B5MCG9;H7C0E9;Q9Y2K5-2;H0YIX9;Q9Y2K5-3	12;11;11;11;8;7;6;6	10;10;10;10;7;7;5;6	10;10;10;10;7;7;5;6	R3H domain-containing protein 2	R3HDM2	tr|B5MCU0|B5MCU0_HUMAN R3H domain-containing protein 2 OS=Homo sapiens OX=9606 GN=R3HDM2 PE=1 SV=1;sp|Q9Y2K5|R3HD2_HUMAN R3H domain-containing protein 2 OS=Homo sapiens OX=9606 GN=R3HDM2 PE=1 SV=3;tr|A0A0U1RRA6|A0A0U1RRA6_HUMAN R3H domain-containing protei	8	12	10	10	6	0	1	0	5	0	11	0	1	1	7	1	4	0	1	0	3	0	10	0	1	0	5	0	4	0	1	0	3	0	10	0	1	0	5	0	20.4
699	Q96AA3;B5MDE0;C9JP01	Q96AA3;B5MDE0;C9JP01	3;3;2	3;3;2	3;3;2	Protein RFT1 homolog	RFT1	sp|Q96AA3|RFT1_HUMAN Protein RFT1 homolog OS=Homo sapiens OX=9606 GN=RFT1 PE=1 SV=1;tr|B5MDE0|B5MDE0_HUMAN Protein RFT1 homolog OS=Homo sapiens OX=9606 GN=RFT1 PE=1 SV=1;tr|C9JP01|C9JP01_HUMAN Protein RFT1 homolog (Fragment) OS=Homo sapiens OX=9606 GN=RFT1	3	3	3	3	0	0	3	0	0	0	0	0	2	0	0	0	0	0	3	0	0	0	0	0	2	0	0	0	0	0	3	0	0	0	0	0	2	0	0	0	6.1
700	P62826;B5MDF5;J3KQE5;F5H018;B4DV51;H0YFC6;A0A087X0W0	P62826;B5MDF5;J3KQE5;F5H018;B4DV51	17;17;16;14;9;7;1	17;17;16;14;9;7;1	17;17;16;14;9;7;1	GTP-binding nuclear protein Ran	RAN	sp|P62826|RAN_HUMAN GTP-binding nuclear protein Ran OS=Homo sapiens OX=9606 GN=RAN PE=1 SV=3;tr|B5MDF5|B5MDF5_HUMAN GTP-binding nuclear protein Ran OS=Homo sapiens OX=9606 GN=RAN PE=1 SV=1;tr|J3KQE5|J3KQE5_HUMAN GTP-binding nuclear protein Ran (Fragment) O	7	17	17	17	10	9	7	11	10	9	7	7	6	13	6	7	10	9	7	11	10	9	7	7	6	13	6	7	10	9	7	11	10	9	7	7	6	13	6	7	75.9
701	Q2NKX8;B5MDQ0	Q2NKX8;B5MDQ0	5;5	5;5	5;5	DNA excision repair protein ERCC-6-like	ERCC6L	sp|Q2NKX8|ERC6L_HUMAN DNA excision repair protein ERCC-6-like OS=Homo sapiens OX=9606 GN=ERCC6L PE=1 SV=1;tr|B5MDQ0|B5MDQ0_HUMAN DNA excision repair protein ERCC-6-like OS=Homo sapiens OX=9606 GN=ERCC6L PE=1 SV=1	2	5	5	5	0	0	5	0	0	0	0	0	0	0	0	0	0	0	5	0	0	0	0	0	0	0	0	0	0	0	5	0	0	0	0	0	0	0	0	0	6.4
702	Q9P0V9;E7EW69;E7EX04;B5ME97;Q9P0V9-3;Q9P0V9-2	Q9P0V9;E7EW69;E7EX04;B5ME97;Q9P0V9-3;Q9P0V9-2	1;1;1;1;1;1	1;1;1;1;1;1	1;1;1;1;1;1	Septin-10	SEPTIN10	sp|Q9P0V9|SEP10_HUMAN Septin-10 OS=Homo sapiens OX=9606 GN=SEPTIN10 PE=1 SV=2;tr|E7EW69|E7EW69_HUMAN Septin-10 OS=Homo sapiens OX=9606 GN=SEPTIN10 PE=1 SV=1;tr|E7EX04|E7EX04_HUMAN Septin-10 OS=Homo sapiens OX=9606 GN=SEPTIN10 PE=1 SV=1;tr|B5ME97|B5ME97_HUM	6	1	1	1	0	0	0	0	0	0	0	0	1	0	0	0	0	0	0	0	0	0	0	0	1	0	0	0	0	0	0	0	0	0	0	0	1	0	0	0	2.4
703	Q8WVV9;B7WPG3;C9IYN3;V9GYK2;Q8WVV9-5;Q8WVV9-4;Q8WVV9-3;Q8WVV9-2;H7BXH8;H7C464;C9JJZ7	Q8WVV9;B7WPG3;C9IYN3;V9GYK2;Q8WVV9-5;Q8WVV9-4	10;10;10;10;10;10;4;4;3;2;2	9;9;9;9;9;9;4;4;3;1;2	9;9;9;9;9;9;4;4;3;1;2	Heterogeneous nuclear ribonucleoprotein L-like	HNRNPLL	sp|Q8WVV9|HNRLL_HUMAN Heterogeneous nuclear ribonucleoprotein L-like OS=Homo sapiens OX=9606 GN=HNRNPLL PE=1 SV=1;tr|B7WPG3|B7WPG3_HUMAN Heterogeneous nuclear ribonucleoprotein L-like OS=Homo sapiens OX=9606 GN=HNRNPLL PE=1 SV=1;tr|C9IYN3|C9IYN3_HUMAN Hete	11	10	9	9	0	1	3	1	0	1	0	6	4	1	0	4	0	0	3	0	0	0	0	5	4	0	0	3	0	0	3	0	0	0	0	5	4	0	0	3	29.7
704	Q5T8D3;Q5T8D3-3;B7Z2R7;Q5T8D3-2;Q5T8D3-4;X6RDD7;Q5T8E0	Q5T8D3;Q5T8D3-3;B7Z2R7;Q5T8D3-2;Q5T8D3-4;X6RDD7;Q5T8E0	9;9;9;9;7;5;5	9;9;9;9;7;5;5	9;9;9;9;7;5;5	Acyl-CoA-binding domain-containing protein 5	ACBD5	sp|Q5T8D3|ACBD5_HUMAN Acyl-CoA-binding domain-containing protein 5 OS=Homo sapiens OX=9606 GN=ACBD5 PE=1 SV=1;sp|Q5T8D3-3|ACBD5_HUMAN Isoform 3 of Acyl-CoA-binding domain-containing protein 5 OS=Homo sapiens OX=9606 GN=ACBD5;tr|B7Z2R7|B7Z2R7_HUMAN Acyl-CoA	7	9	9	9	0	0	9	0	0	0	0	0	1	0	0	0	0	0	9	0	0	0	0	0	1	0	0	0	0	0	9	0	0	0	0	0	1	0	0	0	22.8
705	Q9UKB1;Q9Y297;Q9UKB1-3;B7Z3H4;Q9UKB1-2;Q9Y297-2	Q9UKB1;Q9Y297;Q9UKB1-3;B7Z3H4;Q9UKB1-2;Q9Y297-2	1;1;1;1;1;1	1;1;1;1;1;1	1;1;1;1;1;1	F-box/WD repeat-containing protein 11;F-box/WD repeat-containing protein 1A	FBXW11;BTRC	sp|Q9UKB1|FBW1B_HUMAN F-box/WD repeat-containing protein 11 OS=Homo sapiens OX=9606 GN=FBXW11 PE=1 SV=1;sp|Q9Y297|FBW1A_HUMAN F-box/WD repeat-containing protein 1A OS=Homo sapiens OX=9606 GN=BTRC PE=1 SV=1;sp|Q9UKB1-3|FBW1B_HUMAN Isoform B of F-box/WD repe	6	1	1	1	0	1	0	0	0	1	0	0	0	0	0	0	0	1	0	0	0	1	0	0	0	0	0	0	0	1	0	0	0	1	0	0	0	0	0	0	1.8
706	Q96M96;F8W1R0;B7Z493;E9PJX4;F8VWL3;Q96M96-2	Q96M96;F8W1R0;B7Z493;E9PJX4;F8VWL3;Q96M96-2	2;2;2;2;2;1	2;2;2;2;2;1	2;2;2;2;2;1	FYVE, RhoGEF and PH domain-containing protein 4	FGD4	sp|Q96M96|FGD4_HUMAN FYVE, RhoGEF and PH domain-containing protein 4 OS=Homo sapiens OX=9606 GN=FGD4 PE=1 SV=2;tr|F8W1R0|F8W1R0_HUMAN FYVE, RhoGEF and PH domain-containing protein 4 OS=Homo sapiens OX=9606 GN=FGD4 PE=1 SV=1;tr|B7Z493|B7Z493_HUMAN FYVE, Rho	6	2	2	2	0	0	0	0	0	0	0	0	1	0	1	0	0	0	0	0	0	0	0	0	1	0	1	0	0	0	0	0	0	0	0	0	1	0	1	0	5.9
707	Q15796;B7Z5N5;Q15796-2;O15198;O15198-2;P84022-2;P84022-3;H3BVD1;K7EJX0;H0YKE2;H0YNV1;K7ERC7;H0YMP2;K7EL92;H3BP09;Q15797;P84022-4;H0YL71;K7ESI8	Q15796;B7Z5N5;Q15796-2;O15198;O15198-2;P84022-2;P84022-3;H3BVD1;K7EJX0	4;4;4;2;2;2;2;2;2;1;1;1;1;1;1;1;1;1;1	4;4;4;2;2;2;2;2;2;1;1;1;1;1;1;1;1;1;1	2;2;2;0;0;0;0;0;1;0;0;1;0;1;0;0;0;0;1	Mothers against decapentaplegic homolog 2;Mothers against decapentaplegic homolog;Mothers against decapentaplegic homolog 9;Mothers against decapentaplegic homolog 3	SMAD2;SMAD9;SMAD3	sp|Q15796|SMAD2_HUMAN Mothers against decapentaplegic homolog 2 OS=Homo sapiens OX=9606 GN=SMAD2 PE=1 SV=1;tr|B7Z5N5|B7Z5N5_HUMAN Mothers against decapentaplegic homolog OS=Homo sapiens OX=9606 GN=SMAD2 PE=1 SV=1;sp|Q15796-2|SMAD2_HUMAN Isoform Short of Mo	19	4	4	2	0	0	1	0	0	0	0	0	1	0	2	0	0	0	1	0	0	0	0	0	1	0	2	0	0	0	0	0	0	0	0	0	1	0	1	0	13.1
708	B7Z5R0	B7Z5R0	5	3	3		ZNF747	tr|B7Z5R0|B7Z5R0_HUMAN KRAB domain-containing protein ZNF747 OS=Homo sapiens OX=9606 GN=ZNF747 PE=1 SV=1	1	5	3	3	0	0	0	0	0	1	0	2	0	2	0	5	0	0	0	0	0	0	0	1	0	2	0	3	0	0	0	0	0	0	0	1	0	2	0	3	24.5
709	Q8NDZ6;B7Z6A5;B7Z6T3	Q8NDZ6;B7Z6A5;B7Z6T3	2;2;2	2;2;2	2;2;2	Transmembrane protein 161B	TMEM161B	sp|Q8NDZ6|T161B_HUMAN Transmembrane protein 161B OS=Homo sapiens OX=9606 GN=TMEM161B PE=2 SV=1;tr|B7Z6A5|B7Z6A5_HUMAN Transmembrane protein 161B OS=Homo sapiens OX=9606 GN=TMEM161B PE=1 SV=1;tr|B7Z6T3|B7Z6T3_HUMAN Transmembrane protein 161B OS=Homo sapiens	3	2	2	2	0	0	2	0	0	0	0	0	0	0	0	0	0	0	2	0	0	0	0	0	0	0	0	0	0	0	2	0	0	0	0	0	0	0	0	0	4.7
710	Q96GQ7;B7Z6D5;A0A087X059;A0A087WYH5	Q96GQ7;B7Z6D5	24;24;9;3	24;24;9;3	24;24;9;3	Probable ATP-dependent RNA helicase DDX27	DDX27	sp|Q96GQ7|DDX27_HUMAN Probable ATP-dependent RNA helicase DDX27 OS=Homo sapiens OX=9606 GN=DDX27 PE=1 SV=2;tr|B7Z6D5|B7Z6D5_HUMAN RNA helicase OS=Homo sapiens OX=9606 GN=DDX27 PE=1 SV=1	4	24	24	24	1	6	16	15	0	7	0	0	4	0	0	0	1	6	16	15	0	7	0	0	4	0	0	0	1	6	16	15	0	7	0	0	4	0	0	0	35.4
711	P62495;B7Z7P8;P62495-2;I3L492;D6RCB3;D6RJE8	P62495;B7Z7P8;P62495-2;I3L492	3;3;3;2;1;1	3;3;3;2;1;1	3;3;3;2;1;1	Eukaryotic peptide chain release factor subunit 1	ETF1	sp|P62495|ERF1_HUMAN Eukaryotic peptide chain release factor subunit 1 OS=Homo sapiens OX=9606 GN=ETF1 PE=1 SV=3;tr|B7Z7P8|B7Z7P8_HUMAN Eukaryotic peptide chain release factor subunit 1 OS=Homo sapiens OX=9606 GN=ETF1 PE=1 SV=1;sp|P62495-2|ERF1_HUMAN Isofo	6	3	3	3	1	0	3	0	0	0	0	0	1	0	0	0	1	0	3	0	0	0	0	0	1	0	0	0	1	0	3	0	0	0	0	0	1	0	0	0	6.9
712	Q9BVG8;B7Z896;F5H3M2;Q9BVG8-5;Q9BVG8-2;Q9BVG8-6;H3BTL6;A0A0C4DGM9;Q9BVG8-4;H3BUC0;Q9P2E2;A0A0A0MRS8;Q9P2E2-3	Q9BVG8;B7Z896;F5H3M2;Q9BVG8-5;Q9BVG8-2;Q9BVG8-6;H3BTL6;A0A0C4DGM9;Q9BVG8-4	8;8;8;8;8;8;5;4;4;2;1;1;1	8;8;8;8;8;8;5;4;4;2;1;1;1	7;7;7;7;7;7;4;4;4;2;0;0;0	Kinesin-like protein KIFC3;Kinesin-like protein	KIFC3	sp|Q9BVG8|KIFC3_HUMAN Kinesin-like protein KIFC3 OS=Homo sapiens OX=9606 GN=KIFC3 PE=1 SV=4;tr|B7Z896|B7Z896_HUMAN Kinesin-like protein OS=Homo sapiens OX=9606 GN=KIFC3 PE=1 SV=1;tr|F5H3M2|F5H3M2_HUMAN Kinesin-like protein OS=Homo sapiens OX=9606 GN=KIFC3	13	8	8	7	0	0	4	0	0	1	0	0	4	0	0	0	0	0	4	0	0	1	0	0	4	0	0	0	0	0	4	0	0	1	0	0	3	0	0	0	12.1
713	P11310;B7Z9I1;Q5T4U5;P11310-2;E9PJM9	P11310;B7Z9I1;Q5T4U5;P11310-2	3;3;3;3;1	3;3;3;3;1	3;3;3;3;1	Medium-chain specific acyl-CoA dehydrogenase, mitochondrial	ACADM	sp|P11310|ACADM_HUMAN Medium-chain specific acyl-CoA dehydrogenase, mitochondrial OS=Homo sapiens OX=9606 GN=ACADM PE=1 SV=1;tr|B7Z9I1|B7Z9I1_HUMAN Medium-chain specific acyl-CoA dehydrogenase, mitochondrial OS=Homo sapiens OX=9606 GN=ACADM PE=1 SV=1;tr|Q5	5	3	3	3	1	0	0	0	0	0	0	0	2	0	0	0	1	0	0	0	0	0	0	0	2	0	0	0	1	0	0	0	0	0	0	0	2	0	0	0	7.6
714	P0CG08;B7ZAQ6;B7ZAQ6-2;B7ZAQ6-3;A0A087WW82;U3KPV2;E9PKY3;A0A087WW78	P0CG08;B7ZAQ6;B7ZAQ6-2;B7ZAQ6-3	7;7;7;7;3;3;3;2	7;7;7;7;3;3;3;2	7;7;7;7;3;3;3;2	Golgi pH regulator B;Golgi pH regulator A	GPR89B;GPR89A	sp|P0CG08|GPHRB_HUMAN Golgi pH regulator B OS=Homo sapiens OX=9606 GN=GPR89B PE=1 SV=1;sp|B7ZAQ6|GPHRA_HUMAN Golgi pH regulator A OS=Homo sapiens OX=9606 GN=GPR89A PE=1 SV=2;sp|B7ZAQ6-2|GPHRA_HUMAN Isoform 2 of Golgi pH regulator A OS=Homo sapiens OX=9606	8	7	7	7	0	0	6	0	0	0	0	0	4	0	0	0	0	0	6	0	0	0	0	0	4	0	0	0	0	0	6	0	0	0	0	0	4	0	0	0	23.1
715	Q9H9S4;B7ZBJ5;B7ZBJ4;Q5TAW7	Q9H9S4;B7ZBJ5;B7ZBJ4;Q5TAW7	1;1;1;1	1;1;1;1	1;1;1;1	Calcium-binding protein 39-like	CAB39L	sp|Q9H9S4|CB39L_HUMAN Calcium-binding protein 39-like OS=Homo sapiens OX=9606 GN=CAB39L PE=1 SV=3;tr|B7ZBJ5|B7ZBJ5_HUMAN Calcium-binding protein 39-like (Fragment) OS=Homo sapiens OX=9606 GN=CAB39L PE=1 SV=1;tr|B7ZBJ4|B7ZBJ4_HUMAN Calcium-binding protein 3	4	1	1	1	0	0	0	1	1	1	0	0	1	1	1	1	0	0	0	1	1	1	0	0	1	1	1	1	0	0	0	1	1	1	0	0	1	1	1	1	2.7
716	Q8IVH2;B7ZBM3;Q8IVH2-3;Q8IVH2-2;A0A590UJX7	Q8IVH2;B7ZBM3;Q8IVH2-3;Q8IVH2-2	5;5;5;5;1	5;5;5;5;1	5;5;5;5;1	Forkhead box protein P4	FOXP4	sp|Q8IVH2|FOXP4_HUMAN Forkhead box protein P4 OS=Homo sapiens OX=9606 GN=FOXP4 PE=1 SV=1;tr|B7ZBM3|B7ZBM3_HUMAN Forkhead box protein P4 OS=Homo sapiens OX=9606 GN=FOXP4 PE=1 SV=1;sp|Q8IVH2-3|FOXP4_HUMAN Isoform 3 of Forkhead box protein P4 OS=Homo sapiens	5	5	5	5	0	0	0	0	0	0	0	0	0	5	0	0	0	0	0	0	0	0	0	0	0	5	0	0	0	0	0	0	0	0	0	0	0	5	0	0	16.3
717	P28370;B7ZLQ5	P28370;B7ZLQ5	43;43	43;43	2;2	Probable global transcription activator SNF2L1	SMARCA1	sp|P28370|SMCA1_HUMAN Probable global transcription activator SNF2L1 OS=Homo sapiens OX=9606 GN=SMARCA1 PE=1 SV=2;tr|B7ZLQ5|B7ZLQ5_HUMAN Probable global transcription activator SNF2L1 OS=Homo sapiens OX=9606 GN=SMARCA1 PE=1 SV=1	2	43	43	2	1	23	17	28	0	28	0	7	15	12	0	7	1	23	17	28	0	28	0	7	15	12	0	7	0	1	0	2	0	1	0	1	2	1	0	0	42.3
718	Q17RY0;B7ZLQ8;Q17RY0-2;E5RJM0;A0A590UJI5;E5RFP2;Q17RY0-3;H0YBG1;A0A590UJN2	Q17RY0;B7ZLQ8;Q17RY0-2;E5RJM0;A0A590UJI5;E5RFP2;Q17RY0-3	16;16;16;15;9;9;9;3;1	16;16;16;15;9;9;9;3;1	10;10;10;9;3;3;3;3;1	Cytoplasmic polyadenylation element-binding protein 4	CPEB4	sp|Q17RY0|CPEB4_HUMAN Cytoplasmic polyadenylation element-binding protein 4 OS=Homo sapiens OX=9606 GN=CPEB4 PE=1 SV=1;tr|B7ZLQ8|B7ZLQ8_HUMAN CPEB4 protein OS=Homo sapiens OX=9606 GN=CPEB4 PE=1 SV=1;sp|Q17RY0-2|CPEB4_HUMAN Isoform 2 of Cytoplasmic polyaden	9	16	16	10	11	4	5	2	10	5	9	6	6	1	9	3	11	4	5	2	10	5	9	6	6	1	9	3	7	2	4	2	6	3	6	3	3	1	5	1	31.3
719	B8ZZ50;B9A044;O60573-2;C9JEL3;B4E1E4;B9A023	B8ZZ50;B9A044;O60573-2;C9JEL3;B4E1E4;B9A023	14;13;13;11;8;8	1;0;0;0;0;0	1;0;0;0;0;0	Eukaryotic translation initiation factor 4E type 2	EIF4E2	tr|B8ZZ50|B8ZZ50_HUMAN Eukaryotic translation initiation factor 4E type 2 OS=Homo sapiens OX=9606 GN=EIF4E2 PE=1 SV=1;tr|B9A044|B9A044_HUMAN Eukaryotic translation initiation factor 4E type 2 OS=Homo sapiens OX=9606 GN=EIF4E2 PE=1 SV=1;sp|O60573-2|IF4E2_HU	6	14	1	1	6	1	9	2	8	2	9	4	8	3	11	5	0	0	0	0	0	0	0	0	1	0	0	0	0	0	0	0	0	0	0	0	1	0	0	0	63.6
720	Q86VP1;Q86VP1-2;B8ZZD4;Q86VP1-3;Q86VP1-4;H7C3L5;F8WBU9;C9JBZ7;C9J7J4;V9GZ06	Q86VP1;Q86VP1-2;B8ZZD4;Q86VP1-3;Q86VP1-4	12;12;12;10;10;5;2;2;2;1	12;12;12;10;10;5;2;2;2;1	12;12;12;10;10;5;2;2;2;1	Tax1-binding protein 1	TAX1BP1	sp|Q86VP1|TAXB1_HUMAN Tax1-binding protein 1 OS=Homo sapiens OX=9606 GN=TAX1BP1 PE=1 SV=2;sp|Q86VP1-2|TAXB1_HUMAN Isoform 2 of Tax1-binding protein 1 OS=Homo sapiens OX=9606 GN=TAX1BP1;tr|B8ZZD4|B8ZZD4_HUMAN Tax1-binding protein 1 OS=Homo sapiens OX=9606 G	10	12	12	12	0	0	1	0	11	0	0	0	1	0	3	0	0	0	1	0	11	0	0	0	1	0	3	0	0	0	1	0	11	0	0	0	1	0	3	0	23.3
721	O75223;M0QZK8;H7BZK5;B8ZZK2	O75223;M0QZK8;H7BZK5;B8ZZK2	1;1;1;1	1;1;1;1	1;1;1;1	Gamma-glutamylcyclotransferase	GGCT	sp|O75223|GGCT_HUMAN Gamma-glutamylcyclotransferase OS=Homo sapiens OX=9606 GN=GGCT PE=1 SV=1;tr|M0QZK8|M0QZK8_HUMAN Gamma-glutamylcyclotransferase OS=Homo sapiens OX=9606 PE=4 SV=1;tr|H7BZK5|H7BZK5_HUMAN Gamma-glutamylcyclotransferase (Fragment) OS=Homo s	4	1	1	1	1	0	0	0	0	0	0	0	0	0	0	0	1	0	0	0	0	0	0	0	0	0	0	0	1	0	0	0	0	0	0	0	0	0	0	0	6.9
722	B8ZZQ4;F8WE76	B8ZZQ4	5;1	1;0	1;0		PTCD3	tr|B8ZZQ4|B8ZZQ4_HUMAN Pentatricopeptide repeat domain-containing protein 3, mitochondrial (Fragment) OS=Homo sapiens OX=9606 GN=PTCD3 PE=1 SV=3	2	5	1	1	2	1	4	1	0	0	1	1	3	0	0	0	1	1	0	0	0	0	1	1	0	0	0	0	1	1	0	0	0	0	1	1	0	0	0	0	38
723	Q96G21;B9A008;E7ENR5;H0Y714;B8ZZ47	Q96G21;B9A008;E7ENR5;H0Y714;B8ZZ47	3;3;3;3;2	3;3;3;3;2	3;3;3;3;2	U3 small nucleolar ribonucleoprotein protein IMP4	IMP4	sp|Q96G21|IMP4_HUMAN U3 small nucleolar ribonucleoprotein protein IMP4 OS=Homo sapiens OX=9606 GN=IMP4 PE=1 SV=1;tr|B9A008|B9A008_HUMAN U3 small nucleolar ribonucleoprotein protein IMP4 (Fragment) OS=Homo sapiens OX=9606 GN=IMP4 PE=1 SV=1;tr|E7ENR5|E7ENR5_	5	3	3	3	0	0	1	1	0	1	0	0	2	1	0	0	0	0	1	1	0	1	0	0	2	1	0	0	0	0	1	1	0	1	0	0	2	1	0	0	16.5
724	Q92925;J3KMX2;B9EGA3;Q92925-3;Q92925-2;J3QWB6;C9JYI7	Q92925;J3KMX2;B9EGA3;Q92925-3;Q92925-2	11;11;11;11;11;5;2	9;9;9;9;9;5;0	8;8;8;8;8;5;0	SWI/SNF-related matrix-associated actin-dependent regulator of chromatin subfamily D member 2	SMARCD2	sp|Q92925|SMRD2_HUMAN SWI/SNF-related matrix-associated actin-dependent regulator of chromatin subfamily D member 2 OS=Homo sapiens OX=9606 GN=SMARCD2 PE=1 SV=3;tr|J3KMX2|J3KMX2_HUMAN SWI/SNF-related matrix-associated actin-dependent regulator of chromatin	7	11	9	8	0	5	0	7	0	8	0	6	0	8	0	6	0	4	0	6	0	7	0	4	0	6	0	4	0	4	0	5	0	6	0	4	0	5	0	4	28.8
725	O95602;B9ZVN9	O95602;B9ZVN9	6;6	6;6	6;6	DNA-directed RNA polymerase I subunit RPA1;DNA-directed RNA polymerase	POLR1A	sp|O95602|RPA1_HUMAN DNA-directed RNA polymerase I subunit RPA1 OS=Homo sapiens OX=9606 GN=POLR1A PE=1 SV=2;tr|B9ZVN9|B9ZVN9_HUMAN DNA-directed RNA polymerase subunit OS=Homo sapiens OX=9606 GN=POLR1A PE=1 SV=1	2	6	6	6	0	0	2	1	0	0	0	0	0	4	0	0	0	0	2	1	0	0	0	0	0	4	0	0	0	0	2	1	0	0	0	0	0	4	0	0	6.2
726	CON__tr|C_H6VRG2|H6VRG2_HUMAN;C_H6VRG2	CON__tr|C_H6VRG2|H6VRG2_HUMAN;C_H6VRG2	50;50	1;1	0;0			;tr|C_H6VRG2|H6VRG2_HUMAN __CONT Keratin 1 OS=Homo sapiens OX=9606 GN=KRT1 PE=3 SV=1	2	50	1	0	41	42	16	37	37	36	38	42	21	44	41	40	1	1	1	1	1	1	1	1	1	1	1	1	0	0	0	0	0	0	0	0	0	0	0	0	68.9
727	O43790;CON__sp|C_O43790|KRT86_HUMAN;C_O43790;Q14533;P78385;A0A087X106;CON__sp|C_P78385|KRT83_HUMAN;C_P78385;CON__sp|C_Q14533|KRT81_HUMAN;C_Q14533;A6NCN2;U3KPR1;CON__sp|C_P02539|K2M1_SHEEP;C_P02539	O43790;CON__sp|C_O43790|KRT86_HUMAN;C_O43790;Q14533;P78385;A0A087X106;CON__sp|C_P78385|KRT83_HUMAN;C_P78385;CON__sp|C_Q14533|KRT81_HUMAN;C_Q14533;A6NCN2	14;14;14;12;12;12;12;12;12;12;8;2;1;1	11;11;11;9;9;9;9;9;9;9;8;1;1;1	4;4;4;3;2;3;2;2;3;3;2;0;0;0	Keratin, type II cuticular Hb6;Keratin, type II cuticular Hb1;Keratin, type II cuticular Hb3;Putative keratin-87 protein	KRT86;KRT81;KRT83;KRT87P	sp|O43790|KRT86_HUMAN Keratin, type II cuticular Hb6 OS=Homo sapiens OX=9606 GN=KRT86 PE=1 SV=1;;sp|C_O43790|KRT86_HUMAN __CONT Keratin, type II cuticular Hb6 OS=Homo sapiens OX=9606 GN=KRT86 PE=1 SV=1;sp|Q14533|KRT81_HUMAN Keratin, type II cuticular Hb1 O	14	14	11	4	1	12	1	1	1	1	1	1	1	5	2	1	0	10	0	0	0	0	0	0	0	2	0	0	0	3	0	0	0	0	0	0	0	2	0	0	26.3
728	O76013;CON__sp|C_O76013|KRT36_HUMAN;C_O76013;CON__sp|C_O76013-2|KRT36_HUMAN;C_O76013-2;O76013-2;O76015;CON__sp|C_O76015|KRT38_HUMAN;C_O76015	O76013;CON__sp|C_O76013|KRT36_HUMAN;C_O76013;CON__sp|C_O76013-2|KRT36_HUMAN;C_O76013-2;O76013-2	5;5;5;4;4;4;2;2;2	3;3;3;2;2;2;0;0;0	3;3;3;2;2;2;0;0;0	Keratin, type I cuticular Ha6	KRT36	sp|O76013|KRT36_HUMAN Keratin, type I cuticular Ha6 OS=Homo sapiens OX=9606 GN=KRT36 PE=1 SV=1;;sp|C_O76013|KRT36_HUMAN __CONT Keratin, type I cuticular Ha6 OS=Homo sapiens OX=9606 GN=KRT36 PE=2 SV=1;;sp|C_O76013-2|KRT36_HUMAN __CONT Isoform 2 of Keratin,	9	5	3	3	1	1	1	1	1	1	1	1	1	4	2	1	0	0	0	0	0	0	0	0	0	2	1	0	0	0	0	0	0	0	0	0	0	2	1	0	11.8
729	CON__sp|C_O77727|K1C15_SHEEP;C_O77727	CON__sp|C_O77727|K1C15_SHEEP;C_O77727	11;11	1;1	1;1			;sp|C_O77727|K1C15_SHEEP __CONT Keratin, type I cytoskeletal 15 OS=Ovis aries OX=9940 GN=KRT15 PE=2 SV=1	2	11	1	1	8	8	4	7	7	5	8	8	4	6	7	5	0	0	0	0	0	0	0	1	0	0	0	0	0	0	0	0	0	0	0	1	0	0	0	0	17.2
730	CON__sp|C_P00761|TRYP_PIG;C_P00761	CON__sp|C_P00761|TRYP_PIG;C_P00761	8;8	8;8	8;8			;sp|C_P00761|TRYP_PIG __CONT Trypsin OS=Sus scrofa GN=Trypsin PE=1 SV=1	2	8	8	8	7	7	2	7	8	8	6	7	6	6	7	6	7	7	2	7	8	8	6	7	6	6	7	6	7	7	2	7	8	8	6	7	6	6	7	6	33.3
731	P02533;CON__sp|C_P02533|K1C14_HUMAN;C_P02533;CON__sp|C_Q9D312|K1C20_MOUSE;C_Q9D312;K7ENV3	P02533;CON__sp|C_P02533|K1C14_HUMAN;C_P02533	36;36;36;3;3;2	26;26;26;2;2;2	7;7;7;0;0;0	Keratin, type I cytoskeletal 14	KRT14	sp|P02533|K1C14_HUMAN Keratin, type I cytoskeletal 14 OS=Homo sapiens OX=9606 GN=KRT14 PE=1 SV=4;;sp|C_P02533|K1C14_HUMAN __CONT Keratin, type I cytoskeletal 14 OS=Homo sapiens OX=9606 GN=KRT14 PE=1 SV=4	6	36	26	7	22	21	5	16	12	9	25	21	7	28	25	16	14	14	1	10	8	5	17	12	2	18	16	9	3	3	0	1	1	0	3	4	0	4	3	1	68.4
732	CON__sp|C_P02534|K1M1_SHEEP;C_P02534;Q14532;CON__sp|C_Q14532|K1H2_HUMAN;C_Q14532;Q6A162;G3V1C2;CON__sp|C_Q6A162|K1C40_HUMAN;C_Q6A162	CON__sp|C_P02534|K1M1_SHEEP;C_P02534;Q14532;CON__sp|C_Q14532|K1H2_HUMAN;C_Q14532	6;6;3;3;3;2;2;2;2	1;1;0;0;0;0;0;0;0	0;0;0;0;0;0;0;0;0	Keratin, type I cuticular Ha2	KRT32	;sp|C_P02534|K1M1_SHEEP __CONT Keratin, type I microfibrillar 48 kDa, component 8C-1 OS=Ovis aries OX=9940 PE=1 SV=2;sp|Q14532|K1H2_HUMAN Keratin, type I cuticular Ha2 OS=Homo sapiens OX=9606 GN=KRT32 PE=1 SV=3;;sp|C_Q14532|K1H2_HUMAN __CONT Keratin, type	9	6	1	0	1	3	1	1	1	1	2	2	1	3	1	3	0	0	0	0	0	0	0	0	0	0	0	1	0	0	0	0	0	0	0	0	0	0	0	0	13.8
733	P02538;C_P02538;CON__sp|C_P02538|K2C6A_HUMAN	P02538;C_P02538;CON__sp|C_P02538|K2C6A_HUMAN	37;37;37	1;1;1	1;1;1	Keratin, type II cytoskeletal 6A	KRT6A	sp|P02538|K2C6A_HUMAN Keratin, type II cytoskeletal 6A OS=Homo sapiens OX=9606 GN=KRT6A PE=1 SV=3;sp|C_P02538|K2C6A_HUMAN __CONT Keratin, type II cytoskeletal 6A OS=Homo sapiens OX=9606 GN=KRT6A PE=1 SV=3;	3	37	1	1	25	25	7	18	16	15	23	26	7	30	17	17	1	1	0	0	0	0	1	1	0	1	1	1	1	1	0	0	0	0	1	1	0	1	1	1	53
[truncated: 4,477 more rows]
[truncated: 84 more columns]

## Sheet: Filtered Proteins
id	Protein IDs	Majority protein IDs	Peptide counts (all)	Peptide counts (razor+unique)	Peptide counts (unique)	Protein names	Gene names	Fasta headers	Peptides 1-UIgGC	Peptides 1-UIgGN	Peptides 1-UIPAC	Peptides 1-UIPAN	Peptides 1-UIPC	Peptides 1-UIPN	Peptides 2-BIgGC	Peptides 2-BIgGN	Peptides 2-BIPAC	Peptides 2-BIPAN	Peptides 2-BIPC	Peptides 2-BIPN	Razor + unique peptides 1-UIgGC	Razor + unique peptides 1-UIgGN	Razor + unique peptides 1-UIPC	Razor + unique peptides 1-UIPN	Razor + unique peptides 2-BIgGC	Razor + unique peptides 2-BIgGN	Razor + unique peptides 2-BIPC	Razor + unique peptides 2-BIPN	Unique peptides 1-UIgGC	Unique peptides 1-UIgGN	Unique peptides 1-UIPAC	Unique peptides 1-UIPAN	Unique peptides 1-UIPC	Unique peptides 1-UIPN	Unique peptides 2-BIgGC	Unique peptides 2-BIgGN	Unique peptides 2-BIPAC	Unique peptides 2-BIPAN	Unique peptides 2-BIPC	Mol. weight [kDa]	Q-value	Score	Sequence coverage 1-UIgGC [%]	Sequence coverage 1-UIgGN [%]	Sequence coverage 1-UIPAC [%]	Sequence coverage 1-UIPAN [%]	Sequence coverage 1-UIPC [%]	Sequence coverage 1-UIPN [%]	Sequence coverage 2-BIgGC [%]
[truncated: 4,881 more rows]
[truncated: 42 more columns]

[truncated: 1 more sheets: Nuclear]
