# Supplementary material for: Phase separation of NELFE modulates chromatin accessibility to promote dichotomous signaling pathways in hepatocellular carcinoma
Source: Research Square preprint supplement (doi:10.21203/rs.3.rs-5843408/v1), 2025-04-25
Supplement: Supplementary file 6 [file bb1673b04cba2e5a2443685b.docx]

**SUPPLEMENTAL FIGURES**

**Supplemental Figure S1**. NELFE undergoes phase separation independent of NELF. Model verification and immunofluorescence analyses of various nuclear organelles.

**Supplemental Figure S2**. NELFE modulates chromatin accessibility.

**Supplemental Figure S3**. NELFE depletion affects both paused and non-paused genes.

**Supplemental Figure S4**. NELFE undergoes phase separation to promote HCC progression.

**Supplemental Figure S5**. Immunoblotting of NELFC, NELFA and NELFB in Hep3B and HLE eNELFE-GFP after deleting ΔLCS1 region

**Supplemental Figure S6**. NELFE LLPS with SMARCB1 to modulate the chromatin.

**SUPPLEMENTAL MATERIALS AND METHODS**

**Table S3.** Oligonucleotides

**SUPPLEMENTAL TABLES**

**Table S1.** Group I and Group II genes regulated by NELFE.

**Table S2.** 134 proteins identified from mass spectrometry.
